# Supplementary material for: Transcriptomic Profiling Reveals a Role for TREM-1 Activation in Enterovirus D68 Infection-Induced Proinflammatory Responses
Source: Front Immunol. 2021 Nov 23;12:749618. doi: 10.3389/fimmu.2021.749618 (PMC8650217; doi:10.3389/fimmu.2021.749618)
Supplement: Supplementary Data Sheet 4 — DEGs list at 24 hpi. [file DataSheet_4.xlsx]

## Sheet: DEGs at 24 hpi
Gene_id	24 hpi	Mock	log2FoldChange	pvalue	padj	gene_name	gene_chr	gene_start	gene_end	gene_strand	gene_length	gene_biotype	gene_description	tf_family
ENSG00000155090	3478.43	341.663	3.34916	3.82e-220	8.23e-216	KLF10	8	102648779	102655902	-	4003	protein_coding	Kruppel like factor 10 [Source:HGNC Symbol;Acc:HGNC:11810]	zf-C2H2
ENSG00000168334	319.633	22.7752	3.8069	1.29e-80	1.39e-76	XIRP1	3	39183210	39192596	-	6467	protein_coding	xin actin binding repeat containing 1 [Source:HGNC Symbol;Acc:HGNC:14301]	-
ENSG00000137331	1562.3	74.6122	4.38853	3.65e-74	2.62e-70	IER3	6	30743199	30744554	-	1356	protein_coding	immediate early response 3 [Source:HGNC Symbol;Acc:HGNC:5392]	-
ENSG00000164442	2947.11	372.371	2.98524	3.51e-71	1.89e-67	CITED2	6	139371807	139374620	-	2535	protein_coding	Cbp/p300 interacting transactivator with Glu/Asp rich carboxy-terminal domain 2 [Source:HGNC Symbol;Acc:HGNC:1987]	-
ENSG00000053438	1836.21	5333.59	-1.53824	5.57e-68	2.4e-64	NNAT	20	37521206	37523693	+	1332	protein_coding	neuronatin [Source:HGNC Symbol;Acc:HGNC:7860]	-
ENSG00000142871	2894.82	151.685	4.25395	7.27e-67	2.61e-63	CYR61	1	85580761	85583962	+	2455	protein_coding	cysteine rich angiogenic inducer 61 [Source:HGNC Symbol;Acc:HGNC:2654]	-
ENSG00000118523	906.242	67.7651	3.7396	2.61e-65	8.02e-62	CTGF	6	131948176	131951373	-	2339	protein_coding	connective tissue growth factor [Source:HGNC Symbol;Acc:HGNC:2500]	-
ENSG00000102554	432.064	81.5003	2.40971	3.5e-58	9.41e-55	KLF5	13	73054976	73077542	+	3893	protein_coding	Kruppel like factor 5 [Source:HGNC Symbol;Acc:HGNC:6349]	zf-C2H2
ENSG00000099917	1640.61	516.445	1.6682	1.22e-57	2.92e-54	MED15	22	20495913	20587632	+	10374	protein_coding	mediator complex subunit 15 [Source:HGNC Symbol;Acc:HGNC:14248]	-
ENSG00000125740	341.694	27.4245	3.64202	4.48e-56	9.64e-53	FOSB	19	45467995	45475179	+	5553	protein_coding	FosB proto-oncogene, AP-1 transcription factor subunit [Source:HGNC Symbol;Acc:HGNC:3797]	TF_bZIP
ENSG00000148154	3881.59	1196.92	1.69794	8.83e-55	1.73e-51	UGCG	9	111896766	111935369	+	4615	protein_coding	UDP-glucose ceramide glucosyltransferase [Source:HGNC Symbol;Acc:HGNC:12524]	-
ENSG00000175592	1454.72	152.7	3.25041	1.37e-54	2.45e-51	FOSL1	11	65892049	65900573	-	1887	protein_coding	FOS like 1, AP-1 transcription factor subunit [Source:HGNC Symbol;Acc:HGNC:13718]	TF_bZIP
ENSG00000144655	2219.79	326.295	2.76533	6.3e-53	1.04e-49	CSRNP1	3	39141855	39154562	-	3214	protein_coding	cysteine and serine rich nuclear protein 1 [Source:HGNC Symbol;Acc:HGNC:14300]	-
ENSG00000068615	464.431	1812.17	-1.96184	3.51e-48	5.4e-45	REEP1	2	86213993	86338083	-	5846	protein_coding	receptor accessory protein 1 [Source:HGNC Symbol;Acc:HGNC:25786]	-
ENSG00000134686	4979.93	1712.87	1.53918	1.31e-46	1.88e-43	PHC2	1	33323623	33431052	-	4975	protein_coding	polyhomeotic homolog 2 [Source:HGNC Symbol;Acc:HGNC:3183]	-
ENSG00000196227	295.746	1030.9	-1.8058	3.3e-46	4.44e-43	FAM217B	20	59933764	59948680	+	5323	protein_coding	family with sequence similarity 217 member B [Source:HGNC Symbol;Acc:HGNC:16170]	-
ENSG00000265972	4075.92	247.879	4.03959	1e-44	1.27e-41	TXNIP	1	145992435	145996600	-	3625	protein_coding	thioredoxin interacting protein [Source:HGNC Symbol;Acc:HGNC:16952]	-
ENSG00000087074	3382.35	525.037	2.68677	1.57e-44	1.87e-41	PPP1R15A	19	48872392	48876057	+	3093	protein_coding	protein phosphatase 1 regulatory subunit 15A [Source:HGNC Symbol;Acc:HGNC:14375]	-
ENSG00000145901	1221.01	304.541	2.00165	1.65e-44	1.87e-41	TNIP1	5	151029945	151093577	-	5793	protein_coding	TNFAIP3 interacting protein 1 [Source:HGNC Symbol;Acc:HGNC:16903]	-
ENSG00000125733	694.132	220.084	1.65761	2.37e-44	2.56e-41	TRIP10	19	6737925	6751526	+	3982	protein_coding	thyroid hormone receptor interactor 10 [Source:HGNC Symbol;Acc:HGNC:12304]	-
ENSG00000088826	1014.86	236.65	2.10108	6.59e-42	6.76e-39	SMOX	20	4120980	4187747	+	2946	protein_coding	spermine oxidase [Source:HGNC Symbol;Acc:HGNC:15862]	-
ENSG00000171617	868.694	318.624	1.4488	1.89e-40	1.85e-37	ENC1	5	74627406	74641424	-	5858	protein_coding	ectodermal-neural cortex 1 [Source:HGNC Symbol;Acc:HGNC:3345]	-
ENSG00000173917	587.158	146.664	2.0002	2.24e-40	2.1e-37	HOXB2	17	48540894	48544989	-	2336	protein_coding	homeobox B2 [Source:HGNC Symbol;Acc:HGNC:5113]	Homeobox
ENSG00000111057	2377.22	786.103	1.59691	6.17e-40	5.54e-37	KRT18	12	52948871	52952901	+	3218	protein_coding	keratin 18 [Source:HGNC Symbol;Acc:HGNC:6430]	-
ENSG00000108854	839.702	224.681	1.90479	1.82e-38	1.57e-35	SMURF2	17	64542295	64662068	-	6961	protein_coding	SMAD specific E3 ubiquitin protein ligase 2 [Source:HGNC Symbol;Acc:HGNC:16809]	-
ENSG00000185022	995.918	115.742	3.10332	3.67e-38	3.04e-35	MAFF	22	38200767	38216511	+	5615	protein_coding	MAF bZIP transcription factor F [Source:HGNC Symbol;Acc:HGNC:6780]	TF_bZIP
ENSG00000162745	609.805	1699.25	-1.47827	4.45e-38	3.55e-35	OLFML2B	1	161983192	162023854	-	3415	protein_coding	olfactomedin like 2B [Source:HGNC Symbol;Acc:HGNC:24558]	-
ENSG00000264112	20.6141	199.972	-3.28699	2.12e-36	1.63e-33	AC015813.1	17	57989039	57994850	-	5812	lincRNA	novel transcript	-
ENSG00000215417	61.9602	357.818	-2.55281	2.15e-35	1.6e-32	MIR17HG	13	91347820	91354579	+	3492	processed_transcript	miR-17-92a-1 cluster host gene [Source:HGNC Symbol;Acc:HGNC:23564]	-
ENSG00000171766	206.288	744.848	-1.85518	2.96e-35	2.13e-32	GATM	15	45361124	45402327	-	6644	protein_coding	glycine amidinotransferase [Source:HGNC Symbol;Acc:HGNC:4175]	-
ENSG00000187955	2081.64	5393.21	-1.37257	5.8e-35	4.03e-32	COL14A1	8	120059780	120372036	+	8647	protein_coding	collagen type XIV alpha 1 chain [Source:HGNC Symbol;Acc:HGNC:2191]	-
ENSG00000120738	13332.2	281.023	5.56799	1.63e-34	1.09e-31	EGR1	5	138465490	138469315	+	3138	protein_coding	early growth response 1 [Source:HGNC Symbol;Acc:HGNC:3238]	zf-C2H2
ENSG00000171223	3399.92	261.849	3.69891	5.49e-33	3.58e-30	JUNB	19	12791496	12793315	+	1820	protein_coding	JunB proto-oncogene, AP-1 transcription factor subunit [Source:HGNC Symbol;Acc:HGNC:6205]	TF_bZIP
ENSG00000138166	1614.76	121.422	3.73408	3.38e-32	2.14e-29	DUSP5	10	110497838	110511544	+	2615	protein_coding	dual specificity phosphatase 5 [Source:HGNC Symbol;Acc:HGNC:3071]	-
ENSG00000171365	415.055	1253.32	-1.59239	4.91e-32	3.02e-29	CLCN5	X	49922615	50099235	+	11438	protein_coding	chloride voltage-gated channel 5 [Source:HGNC Symbol;Acc:HGNC:2023]	-
ENSG00000115844	434.676	115.872	1.90624	7.65e-32	4.58e-29	DLX2	2	172099439	172102900	-	2970	protein_coding	distal-less homeobox 2 [Source:HGNC Symbol;Acc:HGNC:2915]	Homeobox
ENSG00000075426	2983.52	1021.01	1.54719	1.58e-31	9.21e-29	FOSL2	2	28392448	28417312	+	7157	protein_coding	FOS like 2, AP-1 transcription factor subunit [Source:HGNC Symbol;Acc:HGNC:3798]	TF_bZIP
ENSG00000153976	386.798	82.5435	2.22902	5.54e-31	3.14e-28	HS3ST3A1	17	13495689	13601927	-	2628	protein_coding	heparan sulfate-glucosamine 3-sulfotransferase 3A1 [Source:HGNC Symbol;Acc:HGNC:5196]	-
ENSG00000106366	756.208	61.0626	3.63243	7.76e-31	4.28e-28	SERPINE1	7	101127089	101139266	+	3190	protein_coding	serpin family E member 1 [Source:HGNC Symbol;Acc:HGNC:8583]	-
ENSG00000159128	703.685	287.801	1.28897	8.25e-31	4.44e-28	IFNGR2	21	33402896	33479348	+	2960	protein_coding	interferon gamma receptor 2 [Source:HGNC Symbol;Acc:HGNC:5440]	-
ENSG00000135318	149.827	23.1728	2.68313	1.27e-30	6.69e-28	NT5E	6	85449584	85495791	+	4533	protein_coding	5'-nucleotidase ecto [Source:HGNC Symbol;Acc:HGNC:8021]	-
ENSG00000111077	988.946	316.858	1.64297	2.64e-30	1.36e-27	TNS2	12	53046969	53064372	+	8093	protein_coding	tensin 2 [Source:HGNC Symbol;Acc:HGNC:19737]	-
ENSG00000160999	666.157	174.304	1.93332	3.08e-30	1.54e-27	SH2B2	7	102285091	102321711	+	2384	protein_coding	SH2B adaptor protein 2 [Source:HGNC Symbol;Acc:HGNC:17381]	-
ENSG00000128564	7924.28	498.872	3.98948	3.33e-30	1.63e-27	VGF	7	101162509	101165593	-	2704	protein_coding	VGF nerve growth factor inducible [Source:HGNC Symbol;Acc:HGNC:12684]	-
ENSG00000249859	405.829	139.452	1.54072	6.57e-30	3.14e-27	PVT1	8	127794533	128101253	+	5493	lincRNA	Pvt1 oncogene [Source:HGNC Symbol;Acc:HGNC:9709]	-
ENSG00000185950	223.845	50.1104	2.16743	8.9e-30	4.17e-27	IRS2	13	109752698	109786568	-	8138	protein_coding	insulin receptor substrate 2 [Source:HGNC Symbol;Acc:HGNC:6126]	-
ENSG00000105373	3812.7	1729.66	1.14016	2.52e-29	1.15e-26	NOP53	19	47745522	47757058	+	5341	protein_coding	NOP53 ribosome biogenesis factor [Source:HGNC Symbol;Acc:HGNC:4333]	-
ENSG00000089327	866.192	380.813	1.18664	4.14e-29	1.85e-26	FXYD5	19	35154730	35169883	+	2993	protein_coding	FXYD domain containing ion transport regulator 5 [Source:HGNC Symbol;Acc:HGNC:4029]	-
ENSG00000160888	1734.49	243.803	2.831	4.21e-29	1.85e-26	IER2	19	13150415	13154908	+	3072	protein_coding	immediate early response 2 [Source:HGNC Symbol;Acc:HGNC:28871]	-
ENSG00000101665	290.979	48.4064	2.59217	1.17e-28	5.03e-26	SMAD7	18	48919853	48952052	-	5033	protein_coding	SMAD family member 7 [Source:HGNC Symbol;Acc:HGNC:6773]	MH1
ENSG00000166886	1001.9	170.378	2.55592	5.7e-28	2.41e-25	NAB2	12	57088894	57095476	+	3010	protein_coding	NGFI-A binding protein 2 [Source:HGNC Symbol;Acc:HGNC:7627]	-
ENSG00000187678	3025.87	1171.38	1.36896	6.7e-28	2.78e-25	SPRY4	5	142310427	142326455	-	6565	protein_coding	sprouty RTK signaling antagonist 4 [Source:HGNC Symbol;Acc:HGNC:15533]	-
ENSG00000113369	2118.57	106.891	4.30943	1.08e-27	4.4e-25	ARRDC3	5	91368724	91383359	-	4934	protein_coding	arrestin domain containing 3 [Source:HGNC Symbol;Acc:HGNC:29263]	-
ENSG00000153234	205.657	40.2321	2.34812	1.23e-27	4.91e-25	NR4A2	2	156324432	156342348	-	3967	protein_coding	nuclear receptor subfamily 4 group A member 2 [Source:HGNC Symbol;Acc:HGNC:7981]	NGFIB-like
ENSG00000169242	347.717	119.472	1.53947	1.55e-27	6.07e-25	EFNA1	1	155127460	155134857	+	2539	protein_coding	ephrin A1 [Source:HGNC Symbol;Acc:HGNC:3221]	-
ENSG00000179456	774.23	1683.31	-1.12076	3.72e-27	1.43e-24	ZBTB18	1	244048939	244057476	+	3906	protein_coding	zinc finger and BTB domain containing 18 [Source:HGNC Symbol;Acc:HGNC:13030]	ZBTB
ENSG00000108107	10695	3987.84	1.42338	4.87e-27	1.84e-24	RPL28	19	55385345	55403250	+	6933	protein_coding	ribosomal protein L28 [Source:HGNC Symbol;Acc:HGNC:10330]	-
ENSG00000139219	1366.74	3813.85	-1.48054	5.83e-27	2.16e-24	COL2A1	12	47972965	48004554	-	6664	protein_coding	collagen type II alpha 1 chain [Source:HGNC Symbol;Acc:HGNC:2200]	-
ENSG00000168062	168.923	48.3839	1.80414	6.04e-27	2.2e-24	BATF2	11	64987943	64997045	-	2844	protein_coding	basic leucine zipper ATF-like transcription factor 2 [Source:HGNC Symbol;Acc:HGNC:25163]	TF_bZIP
ENSG00000111252	1836.33	645.405	1.50939	6.85e-27	2.46e-24	SH2B3	12	111405948	111451623	+	5682	protein_coding	SH2B adaptor protein 3 [Source:HGNC Symbol;Acc:HGNC:29605]	-
ENSG00000101384	1259.98	430.157	1.55081	9.08e-26	3.21e-23	JAG1	20	10637684	10673999	-	9298	protein_coding	jagged 1 [Source:HGNC Symbol;Acc:HGNC:6188]	-
ENSG00000214517	1756.29	874.486	1.00563	1.97e-25	6.86e-23	PPME1	11	74171099	74254703	+	7917	protein_coding	protein phosphatase methylesterase 1 [Source:HGNC Symbol;Acc:HGNC:30178]	-
ENSG00000149256	157.283	593.415	-1.91642	3.02e-25	1.03e-22	TENM4	11	78652831	79440948	-	16330	protein_coding	teneurin transmembrane protein 4 [Source:HGNC Symbol;Acc:HGNC:29945]	-
ENSG00000123240	863.378	350.953	1.30013	3.51e-25	1.18e-22	OPTN	10	13099449	13138308	+	5138	protein_coding	optineurin [Source:HGNC Symbol;Acc:HGNC:17142]	-
ENSG00000253729	5567.16	11313.6	-1.02291	6.35e-25	2.1e-22	PRKDC	8	47773108	47960183	-	15417	protein_coding	protein kinase, DNA-activated, catalytic subunit [Source:HGNC Symbol;Acc:HGNC:9413]	-
ENSG00000101210	13988.4	5711.12	1.29226	7.21e-25	2.35e-22	EEF1A2	20	63488012	63499322	-	4910	protein_coding	eukaryotic translation elongation factor 1 alpha 2 [Source:HGNC Symbol;Acc:HGNC:3192]	-
ENSG00000177426	891.763	405.074	1.13942	9.57e-25	3.08e-22	TGIF1	18	3411608	3459978	+	8222	protein_coding	TGFB induced factor homeobox 1 [Source:HGNC Symbol;Acc:HGNC:11776]	Homeobox
ENSG00000166949	1283.58	528.587	1.27914	1.28e-24	4.06e-22	SMAD3	15	67063763	67195195	+	9113	protein_coding	SMAD family member 3 [Source:HGNC Symbol;Acc:HGNC:6769]	MH1
ENSG00000211459	44927.5	11062.5	2.02189	1.35e-24	4.21e-22	MT-RNR1	MT	648	1601	+	954	Mt_rRNA	mitochondrially encoded 12S RNA [Source:HGNC Symbol;Acc:HGNC:7470]	-
ENSG00000166173	654.205	267.223	1.29319	1.84e-24	5.65e-22	LARP6	15	70829130	70854159	-	5554	protein_coding	La ribonucleoprotein domain family member 6 [Source:HGNC Symbol;Acc:HGNC:24012]	-
ENSG00000132510	2126.8	667.106	1.67237	2.98e-24	9.04e-22	KDM6B	17	7839904	7854796	+	7258	protein_coding	lysine demethylase 6B [Source:HGNC Symbol;Acc:HGNC:29012]	-
ENSG00000170684	269.901	53.874	2.32082	3.06e-24	9.16e-22	ZNF296	19	45071500	45076588	-	1744	protein_coding	zinc finger protein 296 [Source:HGNC Symbol;Acc:HGNC:15981]	zf-C2H2
ENSG00000068028	963.05	319.65	1.58918	5.74e-24	1.69e-21	RASSF1	3	50329782	50340980	-	3683	protein_coding	Ras association domain family member 1 [Source:HGNC Symbol;Acc:HGNC:9882]	-
ENSG00000116717	4174.41	984.08	2.08493	5.79e-24	1.69e-21	GADD45A	1	67685061	67688338	+	2069	protein_coding	growth arrest and DNA damage inducible alpha [Source:HGNC Symbol;Acc:HGNC:4095]	-
ENSG00000177508	743.688	233.394	1.67015	7.52e-24	2.16e-21	IRX3	16	54283304	54286763	-	2911	protein_coding	iroquois homeobox 3 [Source:HGNC Symbol;Acc:HGNC:14360]	Homeobox
ENSG00000127528	177.945	34.0599	2.38101	9.17e-24	2.6e-21	KLF2	19	16324817	16327874	+	2018	protein_coding	Kruppel like factor 2 [Source:HGNC Symbol;Acc:HGNC:6347]	zf-C2H2
ENSG00000116670	1504.81	813.713	0.885872	1.56e-23	4.35e-21	MAD2L2	1	11674480	11691650	-	3324	protein_coding	mitotic arrest deficient 2 like 2 [Source:HGNC Symbol;Acc:HGNC:6764]	-
ENSG00000169116	106.227	329.603	-1.6251	2.91e-23	8.03e-21	PARM1	4	74933095	75050115	+	5034	protein_coding	prostate androgen-regulated mucin-like protein 1 [Source:HGNC Symbol;Acc:HGNC:24536]	-
ENSG00000138449	127.331	383.32	-1.57993	3.09e-23	8.43e-21	SLC40A1	2	189560579	189583758	-	4330	protein_coding	solute carrier family 40 member 1 [Source:HGNC Symbol;Acc:HGNC:10909]	-
ENSG00000094916	1328.3	2631.43	-0.985498	4.61e-23	1.24e-20	CBX5	12	54230940	54280133	-	15040	protein_coding	chromobox 5 [Source:HGNC Symbol;Acc:HGNC:1555]	-
ENSG00000116285	8072.93	847.227	3.25243	5.24e-23	1.39e-20	ERRFI1	1	8004404	8026308	-	4186	protein_coding	ERBB receptor feedback inhibitor 1 [Source:HGNC Symbol;Acc:HGNC:18185]	-
ENSG00000159753	632.991	250.71	1.33502	9.23e-23	2.42e-20	CARMIL2	16	67644919	67657569	+	7699	protein_coding	capping protein regulator and myosin 1 linker 2 [Source:HGNC Symbol;Acc:HGNC:27089]	-
ENSG00000105246	114.789	18.7092	2.6168	9.98e-23	2.59e-20	EBI3	19	4229498	4237531	+	1284	protein_coding	Epstein-Barr virus induced 3 [Source:HGNC Symbol;Acc:HGNC:3129]	-
ENSG00000175467	1176.62	485.607	1.27509	1.45e-22	3.72e-20	SART1	11	65961689	65979828	+	4323	protein_coding	SART1, U4/U6.U5 tri-snRNP-associated protein 1 [Source:HGNC Symbol;Acc:HGNC:10538]	-
ENSG00000168298	193.931	7.03129	4.78633	1.54e-22	3.86e-20	HIST1H1E	6	26156354	26157107	+	754	protein_coding	histone cluster 1 H1 family member e [Source:HGNC Symbol;Acc:HGNC:4718]	-
ENSG00000067082	1622	533.244	1.6037	1.54e-22	3.86e-20	KLF6	10	3775996	3785281	-	6139	protein_coding	Kruppel like factor 6 [Source:HGNC Symbol;Acc:HGNC:2235]	zf-C2H2
ENSG00000136826	254.57	60.9468	2.06344	1.93e-22	4.78e-20	KLF4	9	107484852	107490482	-	3659	protein_coding	Kruppel like factor 4 [Source:HGNC Symbol;Acc:HGNC:6348]	zf-C2H2
ENSG00000003096	200.133	617.781	-1.62079	2.02e-22	4.95e-20	KLHL13	X	117897813	118117340	-	6983	protein_coding	kelch like family member 13 [Source:HGNC Symbol;Acc:HGNC:22931]	-
ENSG00000069399	249.766	46.9675	2.40297	2.24e-22	5.41e-20	BCL3	19	44747705	44760044	+	3242	protein_coding	B cell CLL/lymphoma 3 [Source:HGNC Symbol;Acc:HGNC:998]	-
ENSG00000148773	1135.06	2732.03	-1.26554	4e-22	9.56e-20	MKI67	10	128096659	128126385	-	12807	protein_coding	marker of proliferation Ki-67 [Source:HGNC Symbol;Acc:HGNC:7107]	-
ENSG00000197647	156.439	41.1624	1.92583	5.81e-22	1.37e-19	ZNF433	19	12014732	12035741	-	3079	protein_coding	zinc finger protein 433 [Source:HGNC Symbol;Acc:HGNC:20811]	zf-C2H2
ENSG00000099860	714.352	72.5339	3.30198	6.29e-22	1.47e-19	GADD45B	19	2476122	2478259	+	2138	protein_coding	growth arrest and DNA damage inducible beta [Source:HGNC Symbol;Acc:HGNC:4096]	-
ENSG00000168310	337.176	87.8062	1.94693	7.86e-22	1.82e-19	IRF2	4	184387713	184474580	-	3116	protein_coding	interferon regulatory factor 2 [Source:HGNC Symbol;Acc:HGNC:6117]	IRF
ENSG00000122877	156.179	9.1378	4.10104	8.31e-22	1.9e-19	EGR2	10	62811996	62919900	-	3689	protein_coding	early growth response 2 [Source:HGNC Symbol;Acc:HGNC:3239]	zf-C2H2
ENSG00000179361	890.453	414.004	1.10601	1.01e-21	2.3e-19	ARID3B	15	74541177	74598131	+	6212	protein_coding	AT-rich interaction domain 3B [Source:HGNC Symbol;Acc:HGNC:14350]	ARID
ENSG00000127863	144.836	423.056	-1.55087	1.05e-21	2.35e-19	TNFRSF19	13	23570370	23676104	+	5113	protein_coding	TNF receptor superfamily member 19 [Source:HGNC Symbol;Acc:HGNC:11915]	-
ENSG00000148926	2363.58	103.717	4.51077	1.2e-21	2.66e-19	ADM	11	10304680	10307397	+	2718	protein_coding	adrenomedullin [Source:HGNC Symbol;Acc:HGNC:259]	-
ENSG00000183160	388.795	993.182	-1.35343	1.21e-21	2.66e-19	TMEM119	12	108589846	108598320	-	3189	protein_coding	transmembrane protein 119 [Source:HGNC Symbol;Acc:HGNC:27884]	-
ENSG00000198576	2702.13	211.617	3.67476	1.83e-21	3.99e-19	ARC	8	142611044	142614472	-	2991	protein_coding	activity regulated cytoskeleton associated protein [Source:HGNC Symbol;Acc:HGNC:648]	-
ENSG00000197747	2203.64	647.935	1.76664	3.39e-21	7.3e-19	S100A10	1	151982915	151994390	-	1543	protein_coding	S100 calcium binding protein A10 [Source:HGNC Symbol;Acc:HGNC:10487]	-
ENSG00000135547	596.13	76.3034	2.9685	5.08e-21	1.08e-18	HEY2	6	125747664	125761269	+	2741	protein_coding	hes related family bHLH transcription factor with YRPW motif 2 [Source:HGNC Symbol;Acc:HGNC:4881]	bHLH
ENSG00000138379	729.419	6384.98	-3.13151	6.62e-21	1.4e-18	MSTN	2	190055697	190062729	-	2822	protein_coding	myostatin [Source:HGNC Symbol;Acc:HGNC:4223]	-
ENSG00000225613	8.57785	92.2745	-3.46537	9.05e-21	1.89e-18	LINCMD1	6	52146814	52151119	-	462	lincRNA	long intergenic non-protein coding RNA, muscle differentiation 1 [Source:HGNC Symbol;Acc:HGNC:49089]	-
ENSG00000164692	1592.59	3696.03	-1.21538	1.07e-20	2.22e-18	COL1A2	7	94394561	94431232	+	11156	protein_coding	collagen type I alpha 2 chain [Source:HGNC Symbol;Acc:HGNC:2198]	-
ENSG00000105643	466.146	180.57	1.37074	1.21e-20	2.48e-18	ARRDC2	19	18001132	18014102	+	4637	protein_coding	arrestin domain containing 2 [Source:HGNC Symbol;Acc:HGNC:25225]	-
ENSG00000134531	1552.03	143.796	3.43277	1.49e-20	3.03e-18	EMP1	12	13196716	13219939	+	7838	protein_coding	epithelial membrane protein 1 [Source:HGNC Symbol;Acc:HGNC:3333]	-
ENSG00000255690	90.5751	298.928	-1.7214	1.56e-20	3.13e-18	TRIL	7	28953358	28958292	-	4935	protein_coding	TLR4 interactor with leucine rich repeats [Source:HGNC Symbol;Acc:HGNC:22200]	-
ENSG00000160741	1023.04	366.063	1.48052	1.6e-20	3.17e-18	CRTC2	1	153947669	153958625	-	3612	protein_coding	CREB regulated transcription coactivator 2 [Source:HGNC Symbol;Acc:HGNC:27301]	-
ENSG00000137193	627.544	110.691	2.4997	1.61e-20	3.17e-18	PIM1	6	37170203	37175426	+	2977	protein_coding	Pim-1 proto-oncogene, serine/threonine kinase [Source:HGNC Symbol;Acc:HGNC:8986]	-
ENSG00000128342	761.448	48.8293	3.96072	1.78e-20	3.49e-18	LIF	22	30240447	30246851	-	3969	protein_coding	LIF, interleukin 6 family cytokine [Source:HGNC Symbol;Acc:HGNC:6596]	-
ENSG00000261786	40.3425	182.079	-2.18054	2.23e-20	4.33e-18	AC006058.1	3	44117299	44122365	+	5067	lincRNA	novel transcript	-
ENSG00000162734	3388.39	1676.68	1.01441	2.83e-20	5.44e-18	PEA15	1	160205337	160215376	+	2806	protein_coding	proliferation and apoptosis adaptor protein 15 [Source:HGNC Symbol;Acc:HGNC:8822]	-
ENSG00000117016	395.641	1487.93	-1.90942	3.48e-20	6.64e-18	RIMS3	1	40620679	40665657	-	7235	protein_coding	regulating synaptic membrane exocytosis 3 [Source:HGNC Symbol;Acc:HGNC:21292]	-
ENSG00000166484	452.775	173.999	1.38181	4.02e-20	7.59e-18	MAPK7	17	19377721	19383544	+	5196	protein_coding	mitogen-activated protein kinase 7 [Source:HGNC Symbol;Acc:HGNC:6880]	-
ENSG00000123243	88.6237	292.515	-1.71694	8.28e-20	1.55e-17	ITIH5	10	7559270	7666998	-	14628	protein_coding	inter-alpha-trypsin inhibitor heavy chain family member 5 [Source:HGNC Symbol;Acc:HGNC:21449]	-
ENSG00000284946	25.7498	133.526	-2.37649	1.25e-19	2.31e-17	AC068831.7	15	90966190	91022566	-	7148	protein_coding	novel transcript	-
ENSG00000223547	423.342	151.916	1.47689	1.43e-19	2.63e-17	ZNF844	19	12064699	12081565	+	6620	protein_coding	zinc finger protein 844 [Source:HGNC Symbol;Acc:HGNC:25932]	zf-C2H2
ENSG00000126878	410.831	1002.49	-1.2845	1.71e-19	3.13e-17	AIF1L	9	131096476	131123152	+	5299	protein_coding	allograft inflammatory factor 1 like [Source:HGNC Symbol;Acc:HGNC:28904]	-
ENSG00000011243	1111.32	588.396	0.917651	1.81e-19	3.27e-17	AKAP8L	19	15380048	15419141	-	5081	protein_coding	A-kinase anchoring protein 8 like [Source:HGNC Symbol;Acc:HGNC:29857]	-
ENSG00000105327	170.935	30.218	2.49046	1.9e-19	3.41e-17	BBC3	19	47220822	47232766	-	3180	protein_coding	BCL2 binding component 3 [Source:HGNC Symbol;Acc:HGNC:17868]	-
ENSG00000179388	125.952	14.5836	3.11735	2.41e-19	4.29e-17	EGR3	8	22687659	22693302	-	4855	protein_coding	early growth response 3 [Source:HGNC Symbol;Acc:HGNC:3240]	zf-C2H2
ENSG00000156232	248.59	94.7315	1.39058	3.38e-19	5.96e-17	WHAMM	15	82809628	82836108	+	5123	protein_coding	WAS protein homolog associated with actin, golgi membranes and microtubules [Source:HGNC Symbol;Acc:HGNC:30493]	-
ENSG00000067066	209.77	69.1991	1.60701	3.56e-19	6.24e-17	SP100	2	230415942	230544090	+	12618	protein_coding	SP100 nuclear antigen [Source:HGNC Symbol;Acc:HGNC:11206]	SAND
ENSG00000123485	1601.11	836.581	0.937544	4.27e-19	7.41e-17	HJURP	2	233833416	233854566	-	3821	protein_coding	Holliday junction recognition protein [Source:HGNC Symbol;Acc:HGNC:25444]	-
ENSG00000170345	2245.85	103.347	4.44179	5.52e-19	9.51e-17	FOS	14	75278774	75282230	+	3238	protein_coding	Fos proto-oncogene, AP-1 transcription factor subunit [Source:HGNC Symbol;Acc:HGNC:3796]	TF_bZIP
ENSG00000104979	1078.36	581.539	0.89098	6.65e-19	1.14e-16	C19orf53	19	13774168	13778462	+	1174	protein_coding	chromosome 19 open reading frame 53 [Source:HGNC Symbol;Acc:HGNC:24991]	-
ENSG00000115738	610.358	175.173	1.80409	7.25e-19	1.23e-16	ID2	2	8678845	8684453	+	2205	protein_coding	inhibitor of DNA binding 2 [Source:HGNC Symbol;Acc:HGNC:5361]	bHLH
ENSG00000166619	1133.03	3075.13	-1.44242	8.18e-19	1.37e-16	BLCAP	20	37492472	37527931	-	7869	protein_coding	BLCAP, apoptosis inducing factor [Source:HGNC Symbol;Acc:HGNC:1055]	-
ENSG00000126368	350.673	61.6178	2.51211	8.21e-19	1.37e-16	NR1D1	17	40092787	40100725	-	2772	protein_coding	nuclear receptor subfamily 1 group D member 1 [Source:HGNC Symbol;Acc:HGNC:7962]	THR-like
ENSG00000186340	314.642	650.212	-1.04442	1.28e-18	2.12e-16	THBS2	6	169215780	169254044	-	6412	protein_coding	thrombospondin 2 [Source:HGNC Symbol;Acc:HGNC:11786]	-
ENSG00000241343	30.9062	150.497	-2.30451	1.76e-18	2.89e-16	RPL36A	X	101390824	101396154	+	3964	protein_coding	ribosomal protein L36a [Source:HGNC Symbol;Acc:HGNC:10359]	-
ENSG00000215301	1392.14	3525.53	-1.34175	1.83e-18	2.98e-16	DDX3X	X	41333284	41364472	+	15892	protein_coding	DEAD-box helicase 3 X-linked [Source:HGNC Symbol;Acc:HGNC:2745]	-
ENSG00000170312	582.008	1705.86	-1.54816	2.14e-18	3.46e-16	CDK1	10	60778331	60794852	+	3931	protein_coding	cyclin dependent kinase 1 [Source:HGNC Symbol;Acc:HGNC:1722]	-
ENSG00000138944	131.561	363.398	-1.46254	2.32e-18	3.74e-16	SHISAL1	22	44243667	44312851	-	6751	protein_coding	shisa like 1 [Source:HGNC Symbol;Acc:HGNC:29335]	-
ENSG00000071859	1264.94	601.131	1.07477	3.19e-18	5.09e-16	FAM50A	X	154444126	154450654	+	2567	protein_coding	family with sequence similarity 50 member A [Source:HGNC Symbol;Acc:HGNC:18786]	-
ENSG00000135631	813.515	276.08	1.55927	4.9e-18	7.76e-16	RAB11FIP5	2	73073382	73156721	-	7058	protein_coding	RAB11 family interacting protein 5 [Source:HGNC Symbol;Acc:HGNC:24845]	-
ENSG00000145391	954.88	2004.7	-1.06987	5.48e-18	8.61e-16	SETD7	4	139495941	139606699	-	13916	protein_coding	SET domain containing lysine methyltransferase 7 [Source:HGNC Symbol;Acc:HGNC:30412]	-
ENSG00000089159	2866.11	1297.32	1.14394	5.68e-18	8.86e-16	PXN	12	120210439	120265771	-	7460	protein_coding	paxillin [Source:HGNC Symbol;Acc:HGNC:9718]	-
ENSG00000105997	198.249	68.2612	1.53635	6.71e-18	1.04e-15	HOXA3	7	27106184	27152581	-	4306	protein_coding	homeobox A3 [Source:HGNC Symbol;Acc:HGNC:5104]	Homeobox
ENSG00000006327	1450.46	229.716	2.65729	6.74e-18	1.04e-15	TNFRSF12A	16	3018445	3022383	+	1848	protein_coding	TNF receptor superfamily member 12A [Source:HGNC Symbol;Acc:HGNC:18152]	-
ENSG00000183696	818.454	264.215	1.63291	7.27e-18	1.11e-15	UPP1	7	48088628	48108733	+	4577	protein_coding	uridine phosphorylase 1 [Source:HGNC Symbol;Acc:HGNC:12576]	-
ENSG00000121310	62.5955	273.136	-2.1402	8.79e-18	1.33e-15	ECHDC2	1	52895910	52927212	-	11572	protein_coding	enoyl-CoA hydratase domain containing 2 [Source:HGNC Symbol;Acc:HGNC:23408]	-
ENSG00000120885	496.908	184.779	1.42913	9.1e-18	1.37e-15	CLU	8	27596917	27615031	-	6616	protein_coding	clusterin [Source:HGNC Symbol;Acc:HGNC:2095]	-
ENSG00000158406	217.054	71.1109	1.61787	1.09e-17	1.63e-15	HIST1H4H	6	26277609	26285638	-	2163	protein_coding	histone cluster 1 H4 family member h [Source:HGNC Symbol;Acc:HGNC:4788]	-
ENSG00000276672	25.1776	114.982	-2.18269	1.39e-17	2.07e-15	AL161891.1	13	33846190	33850825	+	4636	sense_intronic	novel transcript, sense intronic to RFC3	-
ENSG00000132535	1266.26	335.593	1.91647	1.48e-17	2.18e-15	DLG4	17	7187169	7219841	-	10317	protein_coding	discs large MAGUK scaffold protein 4 [Source:HGNC Symbol;Acc:HGNC:2903]	-
ENSG00000113070	460.424	120.073	1.94229	1.64e-17	2.4e-15	HBEGF	5	140332843	140346631	-	3018	protein_coding	heparin binding EGF like growth factor [Source:HGNC Symbol;Acc:HGNC:3059]	-
ENSG00000100281	349.702	762.464	-1.12419	1.91e-17	2.77e-15	HMGXB4	22	35257452	35295807	+	6006	protein_coding	HMG-box containing 4 [Source:HGNC Symbol;Acc:HGNC:5003]	HMG
ENSG00000204262	5791.92	10323.4	-0.833646	2.13e-17	3.08e-15	COL5A2	2	189031896	189225312	-	7453	protein_coding	collagen type V alpha 2 chain [Source:HGNC Symbol;Acc:HGNC:2210]	-
ENSG00000128016	640.156	52.2208	3.61645	2.26e-17	3.25e-15	ZFP36	19	39406813	39409412	+	2010	protein_coding	ZFP36 ring finger protein [Source:HGNC Symbol;Acc:HGNC:12862]	-
ENSG00000135048	477.499	966.745	-1.01442	2.56e-17	3.65e-15	CEMIP2	9	71683366	71816690	-	9625	protein_coding	cell migration inducing hyaluronidase 2 [Source:HGNC Symbol;Acc:HGNC:11869]	-
ENSG00000138496	298.413	700.701	-1.23176	2.73e-17	3.86e-15	PARP9	3	122527924	122564577	-	8938	protein_coding	poly(ADP-ribose) polymerase family member 9 [Source:HGNC Symbol;Acc:HGNC:24118]	-
ENSG00000164758	618.939	277.348	1.15557	3.09e-17	4.35e-15	MED30	8	117520713	117540262	+	1440	protein_coding	mediator complex subunit 30 [Source:HGNC Symbol;Acc:HGNC:23032]	-
ENSG00000133083	186.106	426.002	-1.19058	3.12e-17	4.36e-15	DCLK1	13	35768652	36131306	-	14375	protein_coding	doublecortin like kinase 1 [Source:HGNC Symbol;Acc:HGNC:2700]	-
ENSG00000140450	436.486	75.8927	2.52719	3.24e-17	4.5e-15	ARRDC4	15	97960698	97973838	+	4072	protein_coding	arrestin domain containing 4 [Source:HGNC Symbol;Acc:HGNC:28087]	-
ENSG00000077279	70.1748	244.833	-1.7939	3.89e-17	5.37e-15	DCX	X	111293779	111412429	-	10203	protein_coding	doublecortin [Source:HGNC Symbol;Acc:HGNC:2714]	-
ENSG00000198863	401.271	176.565	1.1881	3.95e-17	5.4e-15	RUNDC1	17	42980565	42993690	+	4757	protein_coding	RUN domain containing 1 [Source:HGNC Symbol;Acc:HGNC:25418]	-
ENSG00000150893	255.2	1343.01	-2.39058	3.96e-17	5.4e-15	FREM2	13	38687129	38887131	+	16223	protein_coding	FRAS1 related extracellular matrix protein 2 [Source:HGNC Symbol;Acc:HGNC:25396]	-
ENSG00000164949	778.555	113.811	2.77633	4.45e-17	6.02e-15	GEM	8	94249253	94262350	-	2648	protein_coding	GTP binding protein overexpressed in skeletal muscle [Source:HGNC Symbol;Acc:HGNC:4234]	-
ENSG00000077044	1932.3	862.173	1.16342	4.81e-17	6.47e-15	DGKD	2	233354507	233472104	+	9771	protein_coding	diacylglycerol kinase delta [Source:HGNC Symbol;Acc:HGNC:2851]	-
ENSG00000273802	118.369	17.2056	2.77004	5.11e-17	6.84e-15	HIST1H2BG	6	26215159	26216692	-	1534	protein_coding	histone cluster 1 H2B family member g [Source:HGNC Symbol;Acc:HGNC:4746]	-
ENSG00000175550	1863.83	541.752	1.78163	5.33e-17	7.09e-15	DRAP1	11	65919257	65921561	+	1737	protein_coding	DR1 associated protein 1 [Source:HGNC Symbol;Acc:HGNC:3019]	-
ENSG00000125827	355.301	875.454	-1.30501	5.54e-17	7.32e-15	TMX4	20	7977348	8019829	-	6579	protein_coding	thioredoxin related transmembrane protein 4 [Source:HGNC Symbol;Acc:HGNC:25237]	-
ENSG00000183255	2866.05	1487.83	0.946353	6.13e-17	8.05e-15	PTTG1IP	21	44849585	44873903	-	3537	protein_coding	PTTG1 interacting protein [Source:HGNC Symbol;Acc:HGNC:13524]	-
ENSG00000187840	1901.51	989.304	0.942444	6.24e-17	8.14e-15	EIF4EBP1	8	38030341	38060365	+	1073	protein_coding	eukaryotic translation initiation factor 4E binding protein 1 [Source:HGNC Symbol;Acc:HGNC:3288]	-
ENSG00000120129	676.424	244.049	1.4728	6.36e-17	8.2e-15	DUSP1	5	172768090	172771195	-	2019	protein_coding	dual specificity phosphatase 1 [Source:HGNC Symbol;Acc:HGNC:3064]	-
ENSG00000151929	942.426	434.581	1.11789	6.37e-17	8.2e-15	BAG3	10	119651370	119677819	+	2747	protein_coding	BCL2 associated athanogene 3 [Source:HGNC Symbol;Acc:HGNC:939]	-
ENSG00000115009	214.633	7.30409	4.87232	6.4e-17	8.2e-15	CCL20	2	227805739	227817564	+	1594	protein_coding	C-C motif chemokine ligand 20 [Source:HGNC Symbol;Acc:HGNC:10619]	-
ENSG00000080031	405.757	93.0416	2.12759	7.13e-17	9.09e-15	PTPRH	19	55181248	55209506	-	4344	protein_coding	protein tyrosine phosphatase, receptor type H [Source:HGNC Symbol;Acc:HGNC:9672]	-
ENSG00000139289	4474.22	1502.54	1.57378	8.62e-17	1.09e-14	PHLDA1	12	76025447	76033932	-	8069	protein_coding	pleckstrin homology like domain family A member 1 [Source:HGNC Symbol;Acc:HGNC:8933]	-
ENSG00000197588	106.028	0	10.0304	8.97e-17	1.13e-14	KLKP1	19	50882096	50896398	-	1912	transcribed_unprocessed_pseudogene	kallikrein pseudogene 1 [Source:HGNC Symbol;Acc:HGNC:21260]	-
ENSG00000187720	308.315	659.583	-1.09317	1.1e-16	1.38e-14	THSD4	15	71096952	71783383	+	15837	protein_coding	thrombospondin type 1 domain containing 4 [Source:HGNC Symbol;Acc:HGNC:25835]	-
ENSG00000176542	100.372	334.631	-1.72505	1.11e-16	1.38e-14	USF3	3	113648385	113696646	-	13738	protein_coding	upstream transcription factor family member 3 [Source:HGNC Symbol;Acc:HGNC:30494]	bHLH
ENSG00000056558	103.788	10.6172	3.27546	1.12e-16	1.38e-14	TRAF1	9	120902393	120929173	-	6449	protein_coding	TNF receptor associated factor 1 [Source:HGNC Symbol;Acc:HGNC:12031]	-
ENSG00000144815	396.223	804.699	-1.02309	1.16e-16	1.43e-14	NXPE3	3	101779202	101827392	+	8635	protein_coding	neurexophilin and PC-esterase domain family member 3 [Source:HGNC Symbol;Acc:HGNC:28238]	-
ENSG00000080839	156.015	374.233	-1.25973	1.2e-16	1.47e-14	RBL1	20	36996349	37095995	-	5954	protein_coding	RB transcriptional corepressor like 1 [Source:HGNC Symbol;Acc:HGNC:9893]	-
ENSG00000158220	4.59293	88.0485	-4.2399	1.26e-16	1.53e-14	ESYT3	3	138434586	138481686	+	9816	protein_coding	extended synaptotagmin 3 [Source:HGNC Symbol;Acc:HGNC:24295]	-
ENSG00000165568	147.058	47.5849	1.61806	1.31e-16	1.58e-14	AKR1E2	10	4786629	4848062	+	2417	protein_coding	aldo-keto reductase family 1 member E2 [Source:HGNC Symbol;Acc:HGNC:23437]	-
ENSG00000244879	86.2688	291.492	-1.74264	1.4e-16	1.69e-14	GABPB1-AS1	15	50354959	50372202	+	17179	antisense	GABPB1 antisense RNA 1 [Source:HGNC Symbol;Acc:HGNC:44157]	-
ENSG00000104490	452.474	1011.21	-1.15853	1.48e-16	1.77e-14	NCALD	8	101686543	102124907	-	8042	protein_coding	neurocalcin delta [Source:HGNC Symbol;Acc:HGNC:7655]	-
ENSG00000181649	1483.84	353.44	2.07039	1.64e-16	1.95e-14	PHLDA2	11	2928273	2929455	-	955	protein_coding	pleckstrin homology like domain family A member 2 [Source:HGNC Symbol;Acc:HGNC:12385]	-
ENSG00000183386	551.251	214.936	1.36015	1.72e-16	2.03e-14	FHL3	1	37996770	38005606	-	2004	protein_coding	four and a half LIM domains 3 [Source:HGNC Symbol;Acc:HGNC:3704]	-
ENSG00000167779	294.939	103.743	1.50681	2.28e-16	2.69e-14	IGFBP6	12	53097436	53102345	+	1346	protein_coding	insulin like growth factor binding protein 6 [Source:HGNC Symbol;Acc:HGNC:5475]	-
ENSG00000137726	313.56	680.154	-1.11213	2.38e-16	2.79e-14	FXYD6	11	117836976	117877486	-	5137	protein_coding	FXYD domain containing ion transport regulator 6 [Source:HGNC Symbol;Acc:HGNC:4030]	-
ENSG00000177374	99.0291	16.5688	2.56741	2.73e-16	3.17e-14	HIC1	17	2054154	2063241	+	8108	protein_coding	HIC ZBTB transcriptional repressor 1 [Source:HGNC Symbol;Acc:HGNC:4909]	ZBTB
ENSG00000086544	202.342	71.3883	1.49774	3.06e-16	3.54e-14	ITPKC	19	40717103	40740860	+	3385	protein_coding	inositol-trisphosphate 3-kinase C [Source:HGNC Symbol;Acc:HGNC:14897]	-
ENSG00000275993	305.003	96.8623	1.65196	3.43e-16	3.95e-14	SIK1B	21	6111134	6123739	+	4806	protein_coding	salt inducible kinase 1B (putative) [Source:HGNC Symbol;Acc:HGNC:52389]	-
ENSG00000177606	4357.55	943.958	2.207	3.98e-16	4.56e-14	JUN	1	58780788	58784327	-	3540	protein_coding	Jun proto-oncogene, AP-1 transcription factor subunit [Source:HGNC Symbol;Acc:HGNC:6204]	TF_bZIP
ENSG00000100325	907.144	425.917	1.08874	4.75e-16	5.41e-14	ASCC2	22	29788608	29838304	-	5416	protein_coding	activating signal cointegrator 1 complex subunit 2 [Source:HGNC Symbol;Acc:HGNC:24103]	-
ENSG00000118503	237.376	24.7244	3.25753	5.14e-16	5.82e-14	TNFAIP3	6	137867188	137883312	+	5051	protein_coding	TNF alpha induced protein 3 [Source:HGNC Symbol;Acc:HGNC:11896]	-
ENSG00000114978	853.355	1574	-0.882649	5.26e-16	5.93e-14	MOB1A	2	74152528	74178898	-	6440	protein_coding	MOB kinase activator 1A [Source:HGNC Symbol;Acc:HGNC:16015]	-
ENSG00000171425	451.569	130.805	1.78307	5.33e-16	5.98e-14	ZNF581	19	55635459	55645622	+	1736	protein_coding	zinc finger protein 581 [Source:HGNC Symbol;Acc:HGNC:25017]	zf-C2H2
ENSG00000169045	4064.92	7096.47	-0.803699	5.41e-16	6.03e-14	HNRNPH1	5	179614178	179634784	-	9480	protein_coding	heterogeneous nuclear ribonucleoprotein H1 [Source:HGNC Symbol;Acc:HGNC:5041]	-
ENSG00000066697	948.16	421.276	1.17225	5.91e-16	6.56e-14	MSANTD3	9	100427156	100451711	+	3253	protein_coding	Myb/SANT DNA binding domain containing 3 [Source:HGNC Symbol;Acc:HGNC:23370]	-
ENSG00000138835	1655.21	796.321	1.05536	6.17e-16	6.81e-14	RGS3	9	113444731	113597743	+	13793	protein_coding	regulator of G protein signaling 3 [Source:HGNC Symbol;Acc:HGNC:9999]	-
ENSG00000148019	278.599	634.817	-1.18937	6.24e-16	6.85e-14	CEP78	9	78236062	78279690	+	14355	protein_coding	centrosomal protein 78 [Source:HGNC Symbol;Acc:HGNC:25740]	-
ENSG00000168811	94.1509	28.1301	1.74511	6.26e-16	6.85e-14	IL12A	3	159988750	159996019	+	2040	protein_coding	interleukin 12A [Source:HGNC Symbol;Acc:HGNC:5969]	-
ENSG00000160584	948.003	467.468	1.01861	7.2e-16	7.83e-14	SIK3	11	116843402	117098437	-	10920	protein_coding	SIK family kinase 3 [Source:HGNC Symbol;Acc:HGNC:29165]	-
ENSG00000124098	255.74	637.433	-1.31133	7.28e-16	7.88e-14	FAM210B	20	56358915	56368663	+	3577	protein_coding	family with sequence similarity 210 member B [Source:HGNC Symbol;Acc:HGNC:16102]	-
ENSG00000012660	522.352	1143.98	-1.12753	7.34e-16	7.91e-14	ELOVL5	6	53267398	53349179	-	3813	protein_coding	ELOVL fatty acid elongase 5 [Source:HGNC Symbol;Acc:HGNC:21308]	-
ENSG00000115289	565.84	205.876	1.46213	7.57e-16	8.11e-14	PCGF1	2	74505043	74508580	-	2629	protein_coding	polycomb group ring finger 1 [Source:HGNC Symbol;Acc:HGNC:17615]	-
ENSG00000226210	324.754	139.544	1.21543	8.39e-16	8.95e-14	WASH8P	12	14522	32015	-	1817	unprocessed_pseudogene	WAS protein family homolog 8, pseudogene [Source:HGNC Symbol;Acc:HGNC:53913]	-
ENSG00000105656	517.508	199.818	1.36996	8.6e-16	9.13e-14	ELL	19	18442663	18522127	-	4929	protein_coding	elongation factor for RNA polymerase II [Source:HGNC Symbol;Acc:HGNC:23114]	-
ENSG00000197019	434.999	93.4224	2.22085	8.85e-16	9.35e-14	SERTAD1	19	40421592	40426025	-	2114	protein_coding	SERTA domain containing 1 [Source:HGNC Symbol;Acc:HGNC:17932]	-
ENSG00000166317	166.923	410.7	-1.29633	9.31e-16	9.79e-14	SYNPO2L	10	73644881	73663803	-	5147	protein_coding	synaptopodin 2 like [Source:HGNC Symbol;Acc:HGNC:23532]	-
ENSG00000156970	321.404	730.149	-1.18174	1.06e-15	1.1e-13	BUB1B	15	40161023	40221136	+	4476	protein_coding	BUB1 mitotic checkpoint serine/threonine kinase B [Source:HGNC Symbol;Acc:HGNC:1149]	-
ENSG00000095752	425.135	45.7064	3.21822	1.14e-15	1.19e-13	IL11	19	55364389	55370463	-	2671	protein_coding	interleukin 11 [Source:HGNC Symbol;Acc:HGNC:5966]	-
ENSG00000113916	191.079	36.6781	2.38595	1.43e-15	1.48e-13	BCL6	3	187721377	187745727	-	5938	protein_coding	B cell CLL/lymphoma 6 [Source:HGNC Symbol;Acc:HGNC:1001]	ZBTB
ENSG00000161133	28.8364	115.421	-2.00553	1.72e-15	1.77e-13	USP41	22	20350578	20390758	-	1592	protein_coding	ubiquitin specific peptidase 41 [Source:HGNC Symbol;Acc:HGNC:20070]	-
ENSG00000148677	475.046	27.1123	4.12926	1.74e-15	1.78e-13	ANKRD1	10	90912096	90921276	-	1979	protein_coding	ankyrin repeat domain 1 [Source:HGNC Symbol;Acc:HGNC:15819]	-
ENSG00000175305	110.537	276.615	-1.32927	1.75e-15	1.78e-13	CCNE2	8	94879770	94896678	-	4397	protein_coding	cyclin E2 [Source:HGNC Symbol;Acc:HGNC:1590]	-
ENSG00000170037	1177.48	630.33	0.900381	1.78e-15	1.81e-13	CNTROB	17	7932101	7949918	+	6234	protein_coding	centrobin, centriole duplication and spindle assembly protein [Source:HGNC Symbol;Acc:HGNC:29616]	-
ENSG00000183943	158.227	387.265	-1.29825	1.96e-15	1.98e-13	PRKX	X	3604370	3713608	-	6452	protein_coding	protein kinase X-linked [Source:HGNC Symbol;Acc:HGNC:9441]	-
ENSG00000197461	1863.91	483.661	1.94714	2.28e-15	2.3e-13	PDGFA	7	497258	520296	-	4151	protein_coding	platelet derived growth factor subunit A [Source:HGNC Symbol;Acc:HGNC:8799]	-
ENSG00000112208	341.605	687.54	-1.00805	2.49e-15	2.5e-13	BAG2	6	57172326	57189833	+	6651	protein_coding	BCL2 associated athanogene 2 [Source:HGNC Symbol;Acc:HGNC:938]	-
ENSG00000177463	360.626	776.247	-1.10753	2.79e-15	2.78e-13	NR2C2	3	14947584	15053600	+	11821	protein_coding	nuclear receptor subfamily 2 group C member 2 [Source:HGNC Symbol;Acc:HGNC:7972]	RXR-like
ENSG00000172932	641.49	286.351	1.16249	2.89e-15	2.87e-13	ANKRD13D	11	67288547	67302485	+	6643	protein_coding	ankyrin repeat domain 13D [Source:HGNC Symbol;Acc:HGNC:27880]	-
ENSG00000109736	1284.11	543.99	1.23936	3.46e-15	3.42e-13	MFSD10	4	2930561	2934859	-	3159	protein_coding	major facilitator superfamily domain containing 10 [Source:HGNC Symbol;Acc:HGNC:16894]	-
ENSG00000225733	514.357	972.341	-0.917502	3.55e-15	3.49e-13	FGD5-AS1	3	14920347	14948424	-	5131	antisense	FGD5 antisense RNA 1 [Source:HGNC Symbol;Acc:HGNC:40410]	-
ENSG00000125398	1796	475.158	1.91927	3.57e-15	3.49e-13	SOX9	17	72121020	72126420	+	3935	protein_coding	SRY-box 9 [Source:HGNC Symbol;Acc:HGNC:11204]	HMG
ENSG00000169249	252.924	81.6399	1.63027	3.85e-15	3.75e-13	ZRSR2	X	15790472	15823260	+	2077	protein_coding	zinc finger CCCH-type, RNA binding motif and serine/arginine rich 2 [Source:HGNC Symbol;Acc:HGNC:23019]	-
ENSG00000144868	668.153	355.825	0.90868	4.15e-15	4.02e-13	TMEM108	3	133038391	133397792	+	8425	protein_coding	transmembrane protein 108 [Source:HGNC Symbol;Acc:HGNC:28451]	-
ENSG00000160972	924.538	397.009	1.21876	4.46e-15	4.31e-13	PPP1R16A	8	144477969	144502121	+	5414	protein_coding	protein phosphatase 1 regulatory subunit 16A [Source:HGNC Symbol;Acc:HGNC:14941]	-
ENSG00000261889	55.312	2.0007	4.7739	4.66e-15	4.48e-13	AC108134.2	16	3156736	3157483	-	748	lincRNA	novel transcript	-
ENSG00000198022	4.56818	52.0658	-3.4771	4.68e-15	4.48e-13	SAGE2P	X	135673591	135686151	-	2126	unprocessed_pseudogene	sarcoma antigen 2, pseudogene [Source:HGNC Symbol;Acc:HGNC:51337]	-
ENSG00000168906	2241.83	4370.11	-0.962704	4.74e-15	4.52e-13	MAT2A	2	85539165	85545280	+	4487	protein_coding	methionine adenosyltransferase 2A [Source:HGNC Symbol;Acc:HGNC:6904]	-
ENSG00000159216	1553.04	794.978	0.965737	5.13e-15	4.87e-13	RUNX1	21	34787801	36004667	-	15574	protein_coding	runt related transcription factor 1 [Source:HGNC Symbol;Acc:HGNC:10471]	Runt
ENSG00000196584	150.378	430.762	-1.52235	5.58e-15	5.27e-13	XRCC2	7	152644779	152676165	-	4853	protein_coding	X-ray repair cross complementing 2 [Source:HGNC Symbol;Acc:HGNC:12829]	-
ENSG00000070495	1059.91	411.247	1.36756	6.08e-15	5.72e-13	JMJD6	17	76712832	76726799	-	5969	protein_coding	jumonji domain containing 6, arginine demethylase and lysine hydroxylase [Source:HGNC Symbol;Acc:HGNC:19355]	-
ENSG00000122378	968.017	2069.09	-1.09383	6.41e-15	5.99e-13	PRXL2A	10	80407829	80437115	+	6520	protein_coding	peroxiredoxin like 2A [Source:HGNC Symbol;Acc:HGNC:28651]	-
ENSG00000125148	2148.43	376.864	2.51193	6.42e-15	5.99e-13	MT2A	16	56608199	56609497	+	1299	protein_coding	metallothionein 2A [Source:HGNC Symbol;Acc:HGNC:7406]	-
ENSG00000240476	89.1217	12.4851	2.84038	6.66e-15	6.19e-13	LINC00973	3	98981058	98983096	+	962	lincRNA	long intergenic non-protein coding RNA 973 [Source:HGNC Symbol;Acc:HGNC:48868]	-
ENSG00000007384	679.787	252.8	1.42926	6.96e-15	6.44e-13	RHBDF1	16	58059	76355	-	4914	protein_coding	rhomboid 5 homolog 1 [Source:HGNC Symbol;Acc:HGNC:20561]	-
ENSG00000276966	71.6344	7.08076	3.3196	7.27e-15	6.69e-13	HIST1H4E	6	26204552	26206038	+	1487	protein_coding	histone cluster 1 H4 family member e [Source:HGNC Symbol;Acc:HGNC:4790]	-
ENSG00000150459	1045.58	601.403	0.796422	1.06e-14	9.72e-13	SAP18	13	21140514	21149084	+	3396	protein_coding	Sin3A associated protein 18 [Source:HGNC Symbol;Acc:HGNC:10530]	-
ENSG00000185432	36.3518	200.958	-2.44257	1.13e-14	1.03e-12	METTL7A	12	50923472	50932517	+	4083	protein_coding	methyltransferase like 7A [Source:HGNC Symbol;Acc:HGNC:24550]	-
ENSG00000116514	393.309	178.32	1.13973	1.16e-14	1.06e-12	RNF19B	1	32936445	32964685	-	2610	protein_coding	ring finger protein 19B [Source:HGNC Symbol;Acc:HGNC:26886]	-
ENSG00000097007	2332.48	1295.04	0.848192	1.25e-14	1.13e-12	ABL1	9	130713946	130887675	+	6276	protein_coding	ABL proto-oncogene 1, non-receptor tyrosine kinase [Source:HGNC Symbol;Acc:HGNC:76]	-
ENSG00000099991	1924.07	977.203	0.976839	1.25e-14	1.13e-12	CABIN1	22	24011192	24178628	+	9388	protein_coding	calcineurin binding protein 1 [Source:HGNC Symbol;Acc:HGNC:24187]	-
ENSG00000224957	31.3971	161.864	-2.33737	1.36e-14	1.22e-12	LINC01266	3	536231	846015	+	4075	lincRNA	long intergenic non-protein coding RNA 1266 [Source:HGNC Symbol;Acc:HGNC:50309]	-
ENSG00000148841	439.527	172.827	1.34819	1.49e-14	1.33e-12	ITPRIP	10	104309698	104338448	-	7279	protein_coding	inositol 1,4,5-trisphosphate receptor interacting protein [Source:HGNC Symbol;Acc:HGNC:29370]	-
ENSG00000100065	260.57	90.697	1.51863	1.74e-14	1.55e-12	CARD10	22	37490362	37519542	-	5652	protein_coding	caspase recruitment domain family member 10 [Source:HGNC Symbol;Acc:HGNC:16422]	-
ENSG00000185262	895.778	244.159	1.87321	1.79e-14	1.59e-12	UBALD2	17	76265202	76271299	+	1797	protein_coding	UBA like domain containing 2 [Source:HGNC Symbol;Acc:HGNC:28438]	-
ENSG00000176788	693.897	307.793	1.17505	1.83e-14	1.62e-12	BASP1	5	17065598	17276843	+	2217	protein_coding	brain abundant membrane attached signal protein 1 [Source:HGNC Symbol;Acc:HGNC:957]	-
ENSG00000228716	563.721	1418.08	-1.32854	1.84e-14	1.62e-12	DHFR	5	80626228	80654983	-	4409	protein_coding	dihydrofolate reductase [Source:HGNC Symbol;Acc:HGNC:2861]	-
ENSG00000105700	788.139	424.175	0.895386	1.93e-14	1.69e-12	KXD1	19	18557762	18569387	+	4112	protein_coding	KxDL motif containing 1 [Source:HGNC Symbol;Acc:HGNC:28420]	-
ENSG00000165861	353.898	134.087	1.39864	2.16e-14	1.88e-12	ZFYVE1	14	72969451	73027212	-	5306	protein_coding	zinc finger FYVE-type containing 1 [Source:HGNC Symbol;Acc:HGNC:13180]	-
ENSG00000003989	441.411	996.377	-1.17862	2.22e-14	1.92e-12	SLC7A2	8	17497088	17570573	+	7905	protein_coding	solute carrier family 7 member 2 [Source:HGNC Symbol;Acc:HGNC:11060]	-
ENSG00000087206	797.196	435.181	0.872716	2.34e-14	2.03e-12	UIMC1	5	176905005	177022633	-	4739	protein_coding	ubiquitin interaction motif containing 1 [Source:HGNC Symbol;Acc:HGNC:30298]	-
ENSG00000229563	42.2099	6.88401	2.63249	2.48e-14	2.13e-12	LINC01204	X	45505388	45630202	+	5260	lincRNA	long intergenic non-protein coding RNA 1204 [Source:HGNC Symbol;Acc:HGNC:49635]	-
ENSG00000135333	299.689	615.355	-1.03535	2.83e-14	2.43e-12	EPHA7	6	93240020	93419547	-	7456	protein_coding	EPH receptor A7 [Source:HGNC Symbol;Acc:HGNC:3390]	-
ENSG00000196378	154.025	61.9849	1.31498	3.29e-14	2.81e-12	ZNF34	8	144773114	144787345	-	2222	protein_coding	zinc finger protein 34 [Source:HGNC Symbol;Acc:HGNC:13098]	zf-C2H2
ENSG00000167674	2291.3	1041.12	1.13748	3.35e-14	2.85e-12	HDGFL2	19	4472287	4502211	+	4299	protein_coding	HDGF like 2 [Source:HGNC Symbol;Acc:HGNC:14680]	-
ENSG00000181444	407.811	176.408	1.20823	3.86e-14	3.27e-12	ZNF467	7	149764182	149773479	-	2734	protein_coding	zinc finger protein 467 [Source:HGNC Symbol;Acc:HGNC:23154]	zf-C2H2
ENSG00000198517	1087.28	310.197	1.80828	3.98e-14	3.36e-12	MAFK	7	1530714	1543043	+	4458	protein_coding	MAF bZIP transcription factor K [Source:HGNC Symbol;Acc:HGNC:6782]	TF_bZIP
ENSG00000270332	25.8057	113.083	-2.10973	4.02e-14	3.38e-12	SMC2-AS1	9	104080024	104093073	-	7619	lincRNA	SMC2 antisense RNA 1 (head to head) [Source:HGNC Symbol;Acc:HGNC:50827]	-
ENSG00000173039	1184.19	564.749	1.0685	4.05e-14	3.39e-12	RELA	11	65653596	65663094	-	5464	protein_coding	RELA proto-oncogene, NF-kB subunit [Source:HGNC Symbol;Acc:HGNC:9955]	RHD
ENSG00000223638	38.4125	2.67656	3.88035	4.22e-14	3.52e-12	RFPL4A	19	55759014	55763175	+	1035	protein_coding	ret finger protein like 4A [Source:HGNC Symbol;Acc:HGNC:16449]	-
ENSG00000227232	92.1748	30.9774	1.57067	4.35e-14	3.62e-12	WASH7P	1	14404	29570	-	1351	unprocessed_pseudogene	WAS protein family homolog 7, pseudogene [Source:HGNC Symbol;Acc:HGNC:38034]	-
ENSG00000151014	380.133	79.9137	2.24725	4.68e-14	3.88e-12	NOCT	4	139015789	139045939	+	2504	protein_coding	nocturnin [Source:HGNC Symbol;Acc:HGNC:14254]	Others
ENSG00000105270	446.3	143.058	1.64464	4.88e-14	4.03e-12	CLIP3	19	36014660	36033343	-	3772	protein_coding	CAP-Gly domain containing linker protein 3 [Source:HGNC Symbol;Acc:HGNC:24314]	-
ENSG00000182013	504.231	1086.87	-1.10955	5.08e-14	4.17e-12	PNMA8A	19	46466491	46471563	-	3696	protein_coding	PNMA family member 8A [Source:HGNC Symbol;Acc:HGNC:25578]	-
ENSG00000132326	263.999	114.991	1.20273	5.25e-14	4.3e-12	PER2	2	238244038	238290102	-	6877	protein_coding	period circadian regulator 2 [Source:HGNC Symbol;Acc:HGNC:8846]	-
ENSG00000111859	103.175	20.2542	2.33514	6.04e-14	4.92e-12	NEDD9	6	11183298	11382348	-	10359	protein_coding	neural precursor cell expressed, developmentally down-regulated 9 [Source:HGNC Symbol;Acc:HGNC:7733]	-
ENSG00000214357	153.044	446.813	-1.53987	6.53e-14	5.31e-12	NEURL1B	5	172641266	172691540	+	6424	protein_coding	neuralized E3 ubiquitin protein ligase 1B [Source:HGNC Symbol;Acc:HGNC:35422]	-
ENSG00000135924	968.883	356.532	1.44274	6.82e-14	5.53e-12	DNAJB2	2	219279267	219286900	+	5886	protein_coding	DnaJ heat shock protein family (Hsp40) member B2 [Source:HGNC Symbol;Acc:HGNC:5228]	-
ENSG00000261039	47.6849	155.571	-1.72087	7.58e-14	6.12e-12	LINC02544	6	169175304	169182740	-	544	lincRNA	long intergenic non-protein coding RNA 2544 [Source:HGNC Symbol;Acc:HGNC:53578]	-
ENSG00000230630	52.4314	172.188	-1.70386	8.61e-14	6.92e-12	DNM3OS	1	172138397	172144840	-	3195	antisense	DNM3 opposite strand/antisense RNA [Source:HGNC Symbol;Acc:HGNC:41228]	-
ENSG00000272888	582.236	265.085	1.13259	8.68e-14	6.95e-12	LINC01578	15	92882707	92899701	+	5394	processed_transcript	long intergenic non-protein coding RNA 1578 [Source:HGNC Symbol;Acc:HGNC:48626]	-
ENSG00000205763	220.629	95.7295	1.21018	8.74e-14	6.97e-12	RP9P	7	32916815	32943176	-	1433	transcribed_unprocessed_pseudogene	RP9 pseudogene [Source:HGNC Symbol;Acc:HGNC:33969]	-
ENSG00000046653	685.861	1528.02	-1.15394	9.02e-14	7.17e-12	GPM6B	X	13771031	13938638	-	5675	protein_coding	glycoprotein M6B [Source:HGNC Symbol;Acc:HGNC:4461]	-
ENSG00000159556	158.36	51.8049	1.61091	9.36e-14	7.4e-12	ISL2	15	76336724	76342476	+	2221	protein_coding	ISL LIM homeobox 2 [Source:HGNC Symbol;Acc:HGNC:18524]	Homeobox
ENSG00000134954	333.374	103.955	1.67576	9.38e-14	7.4e-12	ETS1	11	128458761	128587558	-	7149	protein_coding	ETS proto-oncogene 1, transcription factor [Source:HGNC Symbol;Acc:HGNC:3488]	ETS
ENSG00000138119	707.288	330.203	1.09687	1.02e-13	8.04e-12	MYOF	10	93306429	93482317	-	8473	protein_coding	myoferlin [Source:HGNC Symbol;Acc:HGNC:3656]	-
ENSG00000185920	670.81	318.349	1.07716	1.06e-13	8.27e-12	PTCH1	9	95442980	95517057	-	16591	protein_coding	patched 1 [Source:HGNC Symbol;Acc:HGNC:9585]	-
ENSG00000198535	47.2865	6.40071	2.89662	1.16e-13	9.08e-12	C2CD4A	15	62066977	62070917	+	3445	protein_coding	C2 calcium dependent domain containing 4A [Source:HGNC Symbol;Acc:HGNC:33627]	-
ENSG00000146918	746.159	1262.71	-0.75785	1.24e-13	9.61e-12	NCAPG2	7	158631311	158704829	-	6988	protein_coding	non-SMC condensin II complex subunit G2 [Source:HGNC Symbol;Acc:HGNC:21904]	-
ENSG00000188215	232.705	96.5613	1.2733	1.29e-13	9.99e-12	DCUN1D3	16	20854925	20900384	-	6248	protein_coding	defective in cullin neddylation 1 domain containing 3 [Source:HGNC Symbol;Acc:HGNC:28734]	-
ENSG00000022840	2500.9	1648.92	0.600501	1.38e-13	1.07e-11	RNF10	12	120533480	120577594	+	5911	protein_coding	ring finger protein 10 [Source:HGNC Symbol;Acc:HGNC:10055]	-
ENSG00000104957	735.011	280.53	1.38714	1.39e-13	1.07e-11	CCDC130	19	13731760	13763296	+	3307	protein_coding	coiled-coil domain containing 130 [Source:HGNC Symbol;Acc:HGNC:28118]	-
ENSG00000182481	2064.09	3823.79	-0.890041	1.4e-13	1.07e-11	KPNA2	17	68035519	68046842	+	3140	protein_coding	karyopherin subunit alpha 2 [Source:HGNC Symbol;Acc:HGNC:6395]	-
ENSG00000165572	162.32	363.575	-1.15664	1.45e-13	1.11e-11	KBTBD6	13	41127569	41132746	-	5178	protein_coding	kelch repeat and BTB domain containing 6 [Source:HGNC Symbol;Acc:HGNC:25340]	-
ENSG00000153531	132.593	50.3393	1.39828	1.57e-13	1.2e-11	ADPRHL1	13	113399610	113453524	-	10924	protein_coding	ADP-ribosylhydrolase like 1 [Source:HGNC Symbol;Acc:HGNC:21303]	-
ENSG00000087903	396.488	206.954	0.938403	1.9e-13	1.44e-11	RFX2	19	5993164	6199572	-	9094	protein_coding	regulatory factor X2 [Source:HGNC Symbol;Acc:HGNC:9983]	RFX
ENSG00000100890	24.9806	89.1252	-1.86131	2.07e-13	1.56e-11	KIAA0391	14	35121846	35277614	+	6982	protein_coding	KIAA0391 [Source:HGNC Symbol;Acc:HGNC:19958]	-
ENSG00000143252	922.896	1474.61	-0.677043	2.19e-13	1.65e-11	SDHC	1	161314257	161375340	+	14160	protein_coding	succinate dehydrogenase complex subunit C [Source:HGNC Symbol;Acc:HGNC:10682]	-
ENSG00000013588	409.173	80.626	2.34613	2.62e-13	1.96e-11	GPRC5A	12	12890782	12917937	+	8440	protein_coding	G protein-coupled receptor class C group 5 member A [Source:HGNC Symbol;Acc:HGNC:9836]	-
ENSG00000265763	33.1868	161.967	-2.32302	2.89e-13	2.16e-11	ZNF488	10	47365496	47384273	-	3496	protein_coding	zinc finger protein 488 [Source:HGNC Symbol;Acc:HGNC:23535]	zf-C2H2
ENSG00000119669	1391.22	620.806	1.16424	2.9e-13	2.16e-11	IRF2BPL	14	77024543	77028699	-	4157	protein_coding	interferon regulatory factor 2 binding protein like [Source:HGNC Symbol;Acc:HGNC:14282]	-
ENSG00000149257	3399.96	2074.33	0.71234	3.29e-13	2.45e-11	SERPINH1	11	75562056	75572783	+	6281	protein_coding	serpin family H member 1 [Source:HGNC Symbol;Acc:HGNC:1546]	-
ENSG00000104976	622.569	245.897	1.33691	3.36e-13	2.49e-11	SNAPC2	19	7920316	7923250	+	2000	protein_coding	small nuclear RNA activating complex polypeptide 2 [Source:HGNC Symbol;Acc:HGNC:11135]	-
ENSG00000158373	299.046	83.7983	1.83996	3.59e-13	2.64e-11	HIST1H2BD	6	26158146	26171349	+	871	protein_coding	histone cluster 1 H2B family member d [Source:HGNC Symbol;Acc:HGNC:4747]	-
ENSG00000159263	395.159	182.08	1.11668	3.73e-13	2.74e-11	SIM2	21	36699133	36749917	+	7652	protein_coding	SIM bHLH transcription factor 2 [Source:HGNC Symbol;Acc:HGNC:10883]	Others
ENSG00000109220	319.411	130.71	1.29147	3.98e-13	2.91e-11	CHIC2	4	54009789	54064690	-	1318	protein_coding	cysteine rich hydrophobic domain 2 [Source:HGNC Symbol;Acc:HGNC:1935]	-
ENSG00000124126	618.321	1060.29	-0.779835	4.31e-13	3.14e-11	PREX1	20	48624252	48827883	-	7393	protein_coding	phosphatidylinositol-3,4,5-trisphosphate dependent Rac exchange factor 1 [Source:HGNC Symbol;Acc:HGNC:32594]	-
ENSG00000135362	214.947	85.647	1.33062	4.83e-13	3.51e-11	PRR5L	11	36296288	36465204	+	6616	protein_coding	proline rich 5 like [Source:HGNC Symbol;Acc:HGNC:25878]	-
ENSG00000124733	645.692	309.386	1.05793	4.84e-13	3.51e-11	MEA1	6	43011143	43016868	-	3017	protein_coding	male-enhanced antigen 1 [Source:HGNC Symbol;Acc:HGNC:6986]	-
ENSG00000213160	293.538	685.368	-1.221	5.15e-13	3.73e-11	KLHL23	2	169694488	169776989	+	5509	protein_coding	kelch like family member 23 [Source:HGNC Symbol;Acc:HGNC:27506]	-
ENSG00000023608	162.052	64.5986	1.33457	5.42e-13	3.9e-11	SNAPC1	14	61762357	61796428	+	2656	protein_coding	small nuclear RNA activating complex polypeptide 1 [Source:HGNC Symbol;Acc:HGNC:11134]	-
ENSG00000135604	113.353	22.2248	2.36177	5.78e-13	4.15e-11	STX11	6	144150526	144188370	+	1926	protein_coding	syntaxin 11 [Source:HGNC Symbol;Acc:HGNC:11429]	-
ENSG00000162775	913.6	454.034	1.00689	5.88e-13	4.21e-11	RBM15	1	110338506	110346681	+	4670	protein_coding	RNA binding motif protein 15 [Source:HGNC Symbol;Acc:HGNC:14959]	-
ENSG00000054356	175.617	41.2437	2.09635	6.02e-13	4.29e-11	PTPRN	2	219289623	219309648	-	8261	protein_coding	protein tyrosine phosphatase, receptor type N [Source:HGNC Symbol;Acc:HGNC:9676]	-
ENSG00000100320	1171.52	1889.51	-0.688349	6.77e-13	4.81e-11	RBFOX2	22	35738736	36028425	-	10014	protein_coding	RNA binding fox-1 homolog 2 [Source:HGNC Symbol;Acc:HGNC:9906]	-
ENSG00000089199	36.5904	5.63494	2.7094	7.55e-13	5.35e-11	CHGB	20	5911430	5925361	+	4535	protein_coding	chromogranin B [Source:HGNC Symbol;Acc:HGNC:1930]	-
ENSG00000072110	1978.89	1277.98	0.63005	7.99e-13	5.64e-11	ACTN1	14	68874143	68979440	-	10626	protein_coding	actinin alpha 1 [Source:HGNC Symbol;Acc:HGNC:163]	-
ENSG00000130508	973.478	1630.11	-0.743116	8.2e-13	5.77e-11	PXDN	2	1631887	1744852	-	11257	protein_coding	peroxidasin [Source:HGNC Symbol;Acc:HGNC:14966]	-
ENSG00000167257	509.769	277.594	0.873496	8.31e-13	5.83e-11	RNF214	11	117232625	117286445	+	4398	protein_coding	ring finger protein 214 [Source:HGNC Symbol;Acc:HGNC:25335]	-
ENSG00000146112	1195.32	494.196	1.27244	8.64e-13	6.04e-11	PPP1R18	6	30676389	30687895	-	4599	protein_coding	protein phosphatase 1 regulatory subunit 18 [Source:HGNC Symbol;Acc:HGNC:29413]	-
ENSG00000164684	497.445	937.915	-0.911502	9.39e-13	6.54e-11	ZNF704	8	80628451	80874781	-	15008	protein_coding	zinc finger protein 704 [Source:HGNC Symbol;Acc:HGNC:32291]	-
ENSG00000140905	61.3122	235.409	-1.94672	9.68e-13	6.73e-11	GCSH	16	81081938	81096425	-	3677	protein_coding	glycine cleavage system protein H [Source:HGNC Symbol;Acc:HGNC:4208]	-
ENSG00000114948	159.096	371.589	-1.21578	1.01e-12	7.01e-11	ADAM23	2	206443539	206621130	+	6421	protein_coding	ADAM metallopeptidase domain 23 [Source:HGNC Symbol;Acc:HGNC:202]	-
ENSG00000174943	233.342	112.62	1.05075	1.06e-12	7.34e-11	KCTD13	16	29905012	29927035	-	7260	protein_coding	potassium channel tetramerization domain containing 13 [Source:HGNC Symbol;Acc:HGNC:22234]	-
ENSG00000187951	41.9395	134.037	-1.65149	1.08e-12	7.41e-11	AC091057.1	15	30658717	30772993	+	5637	processed_transcript	OTU deubiquitinase 7A pseudogene [Source:NCBI gene;Acc:100288637]	-
ENSG00000170485	1699.34	792.554	1.10155	1.08e-12	7.41e-11	NPAS2	2	100820152	100996829	+	12491	protein_coding	neuronal PAS domain protein 2 [Source:HGNC Symbol;Acc:HGNC:7895]	bHLH
ENSG00000139292	448.816	1501.64	-1.73925	1.13e-12	7.72e-11	LGR5	12	71439770	71586310	+	5251	protein_coding	leucine rich repeat containing G protein-coupled receptor 5 [Source:HGNC Symbol;Acc:HGNC:4504]	-
ENSG00000256771	101.804	225.948	-1.1475	1.21e-12	8.28e-11	ZNF253	19	19865886	19894674	+	3626	protein_coding	zinc finger protein 253 [Source:HGNC Symbol;Acc:HGNC:13497]	zf-C2H2
ENSG00000258441	56.4434	184.074	-1.69476	1.26e-12	8.57e-11	LINC00641	14	21200079	21206900	-	5715	processed_transcript	long intergenic non-protein coding RNA 641 [Source:HGNC Symbol;Acc:HGNC:27511]	-
ENSG00000005238	223.781	72.1161	1.63757	1.31e-12	8.85e-11	FAM214B	9	35104112	35116341	-	6409	protein_coding	family with sequence similarity 214 member B [Source:HGNC Symbol;Acc:HGNC:25666]	-
ENSG00000196428	624.867	299.767	1.05669	1.39e-12	9.42e-11	TSC22D2	3	150408335	150466431	+	11676	protein_coding	TSC22 domain family member 2 [Source:HGNC Symbol;Acc:HGNC:29095]	TSC22
ENSG00000143256	1977.05	949.161	1.05964	1.43e-12	9.66e-11	PFDN2	1	161100556	161118111	-	677	protein_coding	prefoldin subunit 2 [Source:HGNC Symbol;Acc:HGNC:8867]	-
ENSG00000168994	122.932	49.4442	1.31821	1.47e-12	9.89e-11	PXDC1	6	3722614	3752026	-	2474	protein_coding	PX domain containing 1 [Source:HGNC Symbol;Acc:HGNC:21361]	-
ENSG00000164109	886.418	1342.47	-0.599785	1.63e-12	1.09e-10	MAD2L1	4	120055608	120067074	-	5748	protein_coding	mitotic arrest deficient 2 like 1 [Source:HGNC Symbol;Acc:HGNC:6763]	-
ENSG00000053770	278.015	671.245	-1.27017	1.75e-12	1.16e-10	AP5M1	14	57268909	57298742	+	13034	protein_coding	adaptor related protein complex 5 subunit mu 1 [Source:HGNC Symbol;Acc:HGNC:20192]	-
ENSG00000143858	251.593	653.131	-1.37453	1.75e-12	1.17e-10	SYT2	1	202590596	202710417	-	7774	protein_coding	synaptotagmin 2 [Source:HGNC Symbol;Acc:HGNC:11510]	-
ENSG00000114315	386.806	34.5225	3.48751	1.8e-12	1.19e-10	HES1	3	194136145	194138732	+	2062	protein_coding	hes family bHLH transcription factor 1 [Source:HGNC Symbol;Acc:HGNC:5192]	bHLH
ENSG00000120802	2001.69	3963.92	-0.986224	2.09e-12	1.38e-10	TMPO	12	98515512	98550379	+	8593	protein_coding	thymopoietin [Source:HGNC Symbol;Acc:HGNC:11875]	-
ENSG00000157613	125.58	42.4666	1.56423	2.14e-12	1.41e-10	CREB3L1	11	46277661	46321422	+	4037	protein_coding	cAMP responsive element binding protein 3 like 1 [Source:HGNC Symbol;Acc:HGNC:18856]	TF_bZIP
ENSG00000164056	1516.37	708.672	1.09872	2.21e-12	1.45e-10	SPRY1	4	123396795	123403760	+	3963	protein_coding	sprouty RTK signaling antagonist 1 [Source:HGNC Symbol;Acc:HGNC:11269]	-
ENSG00000213719	4685.24	2357.82	0.990299	2.24e-12	1.47e-10	CLIC1	6	31730581	31739763	-	1942	protein_coding	chloride intracellular channel 1 [Source:HGNC Symbol;Acc:HGNC:2062]	-
ENSG00000110711	701.262	379.342	0.88479	2.25e-12	1.47e-10	AIP	11	67483041	67491103	+	1640	protein_coding	aryl hydrocarbon receptor interacting protein [Source:HGNC Symbol;Acc:HGNC:358]	-
ENSG00000182533	57.5175	166.913	-1.53198	2.34e-12	1.52e-10	CAV3	3	8733800	8841808	+	1956	protein_coding	caveolin 3 [Source:HGNC Symbol;Acc:HGNC:1529]	-
ENSG00000160469	436.917	207.152	1.07358	2.35e-12	1.52e-10	BRSK1	19	55282072	55312533	+	3841	protein_coding	BR serine/threonine kinase 1 [Source:HGNC Symbol;Acc:HGNC:18994]	-
ENSG00000141985	3002.97	1400.89	1.09983	2.35e-12	1.52e-10	SH3GL1	19	4360370	4400547	-	3685	protein_coding	SH3 domain containing GRB2 like 1, endophilin A2 [Source:HGNC Symbol;Acc:HGNC:10830]	-
ENSG00000167470	1506.9	643.924	1.22561	2.55e-12	1.64e-10	MIDN	19	1248553	1259140	+	4492	protein_coding	midnolin [Source:HGNC Symbol;Acc:HGNC:16298]	-
ENSG00000106723	1028.59	1775.49	-0.787206	2.69e-12	1.73e-10	SPIN1	9	88388419	88478694	+	4914	protein_coding	spindlin 1 [Source:HGNC Symbol;Acc:HGNC:11243]	-
ENSG00000185650	2690.91	850.394	1.66245	2.79e-12	1.79e-10	ZFP36L1	14	68787660	68796253	-	5160	protein_coding	ZFP36 ring finger protein like 1 [Source:HGNC Symbol;Acc:HGNC:1107]	Others
ENSG00000225530	44.5402	159.618	-1.81968	3.04e-12	1.95e-10	SP3P	13	89361160	89363224	-	2065	processed_pseudogene	Sp3 transcription factor pseudogene [Source:HGNC Symbol;Acc:HGNC:35430]	-
ENSG00000087365	4222.64	2718.29	0.635692	3.19e-12	2.03e-10	SF3B2	11	66050729	66069308	+	9795	protein_coding	splicing factor 3b subunit 2 [Source:HGNC Symbol;Acc:HGNC:10769]	-
ENSG00000263753	184.058	398.186	-1.10869	3.3e-12	2.1e-10	LINC00667	18	5237826	5246508	+	6652	lincRNA	long intergenic non-protein coding RNA 667 [Source:HGNC Symbol;Acc:HGNC:27906]	-
ENSG00000153443	853.946	337.521	1.33726	3.37e-12	2.13e-10	UBALD1	16	4608883	4615027	-	3619	protein_coding	UBA like domain containing 1 [Source:HGNC Symbol;Acc:HGNC:29576]	-
ENSG00000198563	555.483	1183.58	-1.09131	3.45e-12	2.18e-10	DDX39B	6	31530219	31542448	-	7007	protein_coding	DExD-box helicase 39B [Source:HGNC Symbol;Acc:HGNC:13917]	-
ENSG00000143842	243.955	484.981	-0.986607	3.57e-12	2.25e-10	SOX13	1	204073115	204127743	+	7420	protein_coding	SRY-box 13 [Source:HGNC Symbol;Acc:HGNC:11192]	HMG
ENSG00000166848	1127.36	663.719	0.763027	3.98e-12	2.5e-10	TERF2IP	16	75647786	75761872	+	3379	protein_coding	TERF2 interacting protein [Source:HGNC Symbol;Acc:HGNC:19246]	-
ENSG00000082146	411.59	1002.71	-1.28258	4.31e-12	2.7e-10	STRADB	2	201387858	201480846	+	3242	protein_coding	STE20-related kinase adaptor beta [Source:HGNC Symbol;Acc:HGNC:13205]	-
ENSG00000115593	594.21	1242.05	-1.06646	4.42e-12	2.76e-10	SMYD1	2	88067780	88113387	+	4600	protein_coding	SET and MYND domain containing 1 [Source:HGNC Symbol;Acc:HGNC:20986]	-
ENSG00000196730	709.288	1162.64	-0.714576	4.44e-12	2.76e-10	DAPK1	9	87497228	87708633	+	8907	protein_coding	death associated protein kinase 1 [Source:HGNC Symbol;Acc:HGNC:2674]	-
ENSG00000167526	16267.7	9615.53	0.758496	4.48e-12	2.78e-10	RPL13	16	89560657	89566828	+	6172	protein_coding	ribosomal protein L13 [Source:HGNC Symbol;Acc:HGNC:10303]	-
ENSG00000184428	1850.16	1012.89	0.86828	4.51e-12	2.79e-10	TOP1MT	8	143304384	143359979	-	6441	protein_coding	DNA topoisomerase I mitochondrial [Source:HGNC Symbol;Acc:HGNC:29787]	-
ENSG00000137573	303.566	634.657	-1.06767	5e-12	3.09e-10	SULF1	8	69466624	69660915	+	9404	protein_coding	sulfatase 1 [Source:HGNC Symbol;Acc:HGNC:20391]	-
ENSG00000143643	68.2095	232.283	-1.78361	5.63e-12	3.45e-10	TTC13	1	230906243	230978875	-	4212	protein_coding	tetratricopeptide repeat domain 13 [Source:HGNC Symbol;Acc:HGNC:26204]	-
ENSG00000164574	235.683	656.056	-1.48248	5.63e-12	3.45e-10	GALNT10	5	154190730	154420984	+	10496	protein_coding	polypeptide N-acetylgalactosaminyltransferase 10 [Source:HGNC Symbol;Acc:HGNC:19873]	-
ENSG00000271533	3.85827	41.0062	-3.40712	5.64e-12	3.45e-10	Z83843.1	X	74209976	74213660	-	3685	sense_intronic	novel transcript, sense intronic FTX	-
ENSG00000087085	383.872	164.805	1.21738	5.87e-12	3.57e-10	ACHE	7	100889994	100896974	-	3783	protein_coding	acetylcholinesterase (Cartwright blood group) [Source:HGNC Symbol;Acc:HGNC:108]	-
ENSG00000243716	970.533	359.899	1.43237	5.87e-12	3.57e-10	NPIPB5	16	22479121	22536521	+	10005	protein_coding	nuclear pore complex interacting protein family member B5 [Source:HGNC Symbol;Acc:HGNC:37233]	-
ENSG00000138796	297.095	569.819	-0.944164	5.92e-12	3.59e-10	HADH	4	107989714	108035175	+	12086	protein_coding	hydroxyacyl-CoA dehydrogenase [Source:HGNC Symbol;Acc:HGNC:4799]	-
ENSG00000109606	2257.46	3766.48	-0.738558	6e-12	3.63e-10	DHX15	4	24517441	24584550	-	8162	protein_coding	DEAH-box helicase 15 [Source:HGNC Symbol;Acc:HGNC:2738]	-
ENSG00000182809	1850.63	836.89	1.14369	6.03e-12	3.64e-10	CRIP2	14	105472962	105480170	+	4837	protein_coding	cysteine rich protein 2 [Source:HGNC Symbol;Acc:HGNC:2361]	-
ENSG00000168264	807.587	275.268	1.55457	6.92e-12	4.16e-10	IRF2BP2	1	234604269	234609525	-	4724	protein_coding	interferon regulatory factor 2 binding protein 2 [Source:HGNC Symbol;Acc:HGNC:21729]	-
ENSG00000108840	871.528	371.41	1.23217	6.94e-12	4.16e-10	HDAC5	17	44076746	44123702	-	7618	protein_coding	histone deacetylase 5 [Source:HGNC Symbol;Acc:HGNC:14068]	-
ENSG00000164070	411.593	1206.77	-1.54833	6.97e-12	4.17e-10	HSPA4L	4	127781821	127840733	+	11621	protein_coding	heat shock protein family A (Hsp70) member 4 like [Source:HGNC Symbol;Acc:HGNC:17041]	-
ENSG00000202111	57.2574	1.88141	4.93502	7.55e-12	4.49e-10	VTRNA1-2	5	140718925	140719013	+	89	misc_RNA	vault RNA 1-2 [Source:HGNC Symbol;Acc:HGNC:12655]	-
ENSG00000263934	31.1535	0.733969	5.41711	7.55e-12	4.49e-10	SNORD3A	17	19188016	19188714	+	699	snoRNA	small nucleolar RNA, C/D box 3A [Source:HGNC Symbol;Acc:HGNC:33189]	-
ENSG00000148604	57.0521	169.465	-1.5822	7.73e-12	4.59e-10	RGR	10	84245053	84259960	+	4256	protein_coding	retinal G protein coupled receptor [Source:HGNC Symbol;Acc:HGNC:9990]	-
ENSG00000072182	33.946	129.029	-1.92192	8.01e-12	4.73e-10	ASIC4	2	219514170	219538772	+	5250	protein_coding	acid sensing ion channel subunit family member 4 [Source:HGNC Symbol;Acc:HGNC:21263]	-
ENSG00000143494	188.856	453.801	-1.25725	8.02e-12	4.73e-10	VASH2	1	212950520	212992037	+	9086	protein_coding	vasohibin 2 [Source:HGNC Symbol;Acc:HGNC:25723]	-
ENSG00000175197	390.436	98.1954	1.99442	8.53e-12	5.02e-10	DDIT3	12	57516588	57521737	-	1307	protein_coding	DNA damage inducible transcript 3 [Source:HGNC Symbol;Acc:HGNC:2726]	TF_bZIP
ENSG00000140332	1041.18	485.988	1.09803	8.61e-12	5.05e-10	TLE3	15	70047790	70098176	-	12634	protein_coding	transducin like enhancer of split 3 [Source:HGNC Symbol;Acc:HGNC:11839]	-
ENSG00000112992	386.076	787.266	-1.03177	8.91e-12	5.21e-10	NNT	5	43602692	43707405	+	8245	protein_coding	nicotinamide nucleotide transhydrogenase [Source:HGNC Symbol;Acc:HGNC:7863]	-
ENSG00000170545	222.431	104.89	1.08731	1.02e-11	5.98e-10	SMAGP	12	51244558	51270890	-	3558	protein_coding	small cell adhesion glycoprotein [Source:HGNC Symbol;Acc:HGNC:26918]	-
ENSG00000147883	661.727	125.758	2.39718	1.04e-11	6.04e-10	CDKN2B	9	22002903	22009363	-	4058	protein_coding	cyclin dependent kinase inhibitor 2B [Source:HGNC Symbol;Acc:HGNC:1788]	-
ENSG00000116977	20.125	82.9322	-2.05242	1.04e-11	6.05e-10	LGALS8	1	236518000	236552981	+	9710	protein_coding	galectin 8 [Source:HGNC Symbol;Acc:HGNC:6569]	-
ENSG00000148082	118.077	322.271	-1.4389	1.05e-11	6.05e-10	SHC3	9	89005771	89178767	-	9929	protein_coding	SHC adaptor protein 3 [Source:HGNC Symbol;Acc:HGNC:18181]	-
ENSG00000139291	104.3	244.553	-1.23891	1.15e-11	6.65e-10	TMEM19	12	71686087	71705046	+	6488	protein_coding	transmembrane protein 19 [Source:HGNC Symbol;Acc:HGNC:25605]	-
ENSG00000167601	644.505	127.179	2.33879	1.18e-11	6.82e-10	AXL	19	41219203	41261766	+	5154	protein_coding	AXL receptor tyrosine kinase [Source:HGNC Symbol;Acc:HGNC:905]	-
ENSG00000166402	235.167	533.614	-1.18229	1.21e-11	6.92e-10	TUB	11	8019244	8106112	+	6722	protein_coding	tubby bipartite transcription factor [Source:HGNC Symbol;Acc:HGNC:12406]	Tub
ENSG00000152284	649.678	337.914	0.941223	1.28e-11	7.35e-10	TCF7L1	2	85133410	85310388	+	4414	protein_coding	transcription factor 7 like 1 [Source:HGNC Symbol;Acc:HGNC:11640]	HMG
ENSG00000164951	2412.42	1301.46	0.89079	1.32e-11	7.55e-10	PDP1	8	93857807	93926066	+	5603	protein_coding	pyruvate dehyrogenase phosphatase catalytic subunit 1 [Source:HGNC Symbol;Acc:HGNC:9279]	-
ENSG00000176624	460.013	256.552	0.846021	1.43e-11	8.17e-10	MEX3C	18	51174550	51218304	-	7481	protein_coding	mex-3 RNA binding family member C [Source:HGNC Symbol;Acc:HGNC:28040]	-
ENSG00000142669	1101.5	517.351	1.0907	1.45e-11	8.22e-10	SH3BGRL3	1	26279176	26281522	+	1786	protein_coding	SH3 domain binding glutamate rich protein like 3 [Source:HGNC Symbol;Acc:HGNC:15568]	-
ENSG00000196811	84.5133	210.105	-1.32599	1.47e-11	8.31e-10	CHRNG	2	232539727	232546403	+	2615	protein_coding	cholinergic receptor nicotinic gamma subunit [Source:HGNC Symbol;Acc:HGNC:1967]	-
ENSG00000197905	1194.49	645.4	0.886436	1.53e-11	8.67e-10	TEAD4	12	2959330	3040673	+	2272	protein_coding	TEA domain transcription factor 4 [Source:HGNC Symbol;Acc:HGNC:11717]	TEA
ENSG00000169083	145.387	337.901	-1.22795	1.7e-11	9.58e-10	AR	X	67544032	67730619	+	12775	protein_coding	androgen receptor [Source:HGNC Symbol;Acc:HGNC:644]	ESR-like
ENSG00000130540	353.335	175.51	1.01327	1.76e-11	9.9e-10	SULT4A1	22	43824509	43862503	-	2849	protein_coding	sulfotransferase family 4A member 1 [Source:HGNC Symbol;Acc:HGNC:14903]	-
ENSG00000023445	50.8059	6.5611	2.96171	1.77e-11	9.92e-10	BIRC3	11	102317450	102339403	+	7518	protein_coding	baculoviral IAP repeat containing 3 [Source:HGNC Symbol;Acc:HGNC:591]	-
ENSG00000152784	178.793	26.3644	2.7684	1.78e-11	9.95e-10	PRDM8	4	80183879	80204329	+	4588	protein_coding	PR/SET domain 8 [Source:HGNC Symbol;Acc:HGNC:13993]	zf-C2H2
ENSG00000089351	740.866	352.99	1.06976	1.88e-11	1.05e-09	GRAMD1A	19	34994784	35026471	+	5942	protein_coding	GRAM domain containing 1A [Source:HGNC Symbol;Acc:HGNC:29305]	-
ENSG00000250899	201.495	465.432	-1.20848	1.88e-11	1.05e-09	AC125807.2	12	3041437	3044950	+	3514	lincRNA	novel transcript	-
ENSG00000174500	41.7759	131.013	-1.63583	1.9e-11	1.05e-09	GCSAM	3	112120841	112133305	-	3783	protein_coding	germinal center associated signaling and motility [Source:HGNC Symbol;Acc:HGNC:20253]	-
ENSG00000124145	826.727	388.506	1.08848	2.15e-11	1.19e-09	SDC4	20	45325288	45348424	-	2613	protein_coding	syndecan 4 [Source:HGNC Symbol;Acc:HGNC:10661]	-
ENSG00000185630	153.611	378.105	-1.28945	2.19e-11	1.21e-09	PBX1	1	164555584	164899296	+	21249	protein_coding	PBX homeobox 1 [Source:HGNC Symbol;Acc:HGNC:8632]	Homeobox
ENSG00000277258	703.721	315.92	1.15516	2.32e-11	1.28e-09	PCGF2	17	38733897	38749817	-	3511	protein_coding	polycomb group ring finger 2 [Source:HGNC Symbol;Acc:HGNC:12929]	-
ENSG00000205056	18.4832	79.9085	-2.1371	2.35e-11	1.29e-09	LINC02397	12	92466451	92492091	+	10626	lincRNA	long intergenic non-protein coding RNA 2397 [Source:HGNC Symbol;Acc:HGNC:53323]	-
ENSG00000114923	479.311	198.03	1.27676	2.4e-11	1.32e-09	SLC4A3	2	219627327	219641980	+	5091	protein_coding	solute carrier family 4 member 3 [Source:HGNC Symbol;Acc:HGNC:11029]	-
ENSG00000280119	2.89825	65.0826	-4.35336	2.42e-11	1.32e-09	AC093642.2	2	242001209	242006013	+	4805	TEC	TEC	-
ENSG00000160298	105.173	250.417	-1.26071	2.61e-11	1.42e-09	C21orf58	21	46300181	46323875	-	5315	protein_coding	chromosome 21 open reading frame 58 [Source:HGNC Symbol;Acc:HGNC:1300]	-
ENSG00000162521	2763.15	4479.39	-0.696386	2.69e-11	1.46e-09	RBBP4	1	32651142	32686211	+	9470	protein_coding	RB binding protein 4, chromatin remodeling factor [Source:HGNC Symbol;Acc:HGNC:9887]	-
ENSG00000128285	117.364	279.591	-1.25731	2.82e-11	1.53e-09	MCHR1	22	40678750	40682814	+	2961	protein_coding	melanin concentrating hormone receptor 1 [Source:HGNC Symbol;Acc:HGNC:4479]	-
ENSG00000177469	1571.48	694.011	1.17811	2.87e-11	1.55e-09	CAVIN1	17	42402452	42423517	-	3828	protein_coding	caveolae associated protein 1 [Source:HGNC Symbol;Acc:HGNC:9688]	-
ENSG00000198342	95.3545	30.4143	1.6502	2.93e-11	1.58e-09	ZNF442	19	12345949	12365905	-	6569	protein_coding	zinc finger protein 442 [Source:HGNC Symbol;Acc:HGNC:20877]	zf-C2H2
ENSG00000112394	61.1469	142.921	-1.2189	3.15e-11	1.69e-09	SLC16A10	6	111087503	111231194	+	11237	protein_coding	solute carrier family 16 member 10 [Source:HGNC Symbol;Acc:HGNC:17027]	-
ENSG00000270127	3.95205	41.5358	-3.33818	3.21e-11	1.72e-09	AC027020.2	15	100547765	100550153	-	2389	lincRNA	novel transcript	-
ENSG00000175106	120.174	44.0313	1.45364	3.29e-11	1.76e-09	TVP23C	17	15502264	15563595	-	5435	protein_coding	trans-golgi network vesicle protein 23 homolog C [Source:HGNC Symbol;Acc:HGNC:30453]	-
ENSG00000124228	1740.37	1073.15	0.696583	3.29e-11	1.76e-09	DDX27	20	49219295	49244077	+	5457	protein_coding	DEAD-box helicase 27 [Source:HGNC Symbol;Acc:HGNC:15837]	-
ENSG00000105825	357.019	188.702	0.919876	3.31e-11	1.77e-09	TFPI2	7	93885396	93890991	-	2682	protein_coding	tissue factor pathway inhibitor 2 [Source:HGNC Symbol;Acc:HGNC:11761]	-
ENSG00000116830	608.14	1139.36	-0.908681	3.32e-11	1.77e-09	TTF2	1	117060303	117107453	+	10181	protein_coding	transcription termination factor 2 [Source:HGNC Symbol;Acc:HGNC:12398]	-
ENSG00000186834	507.547	868.323	-0.774771	3.53e-11	1.87e-09	HEXIM1	17	45148502	45152101	+	3600	protein_coding	hexamethylene bisacetamide inducible 1 [Source:HGNC Symbol;Acc:HGNC:24953]	-
ENSG00000203814	111.629	7.22524	3.94614	3.56e-11	1.89e-09	HIST2H2BF	1	149782689	149812373	-	3196	protein_coding	histone cluster 2 H2B family member f [Source:HGNC Symbol;Acc:HGNC:24700]	-
ENSG00000185158	141.227	55.4144	1.35347	3.65e-11	1.93e-09	LRRC37B	17	32007872	32053504	+	6281	protein_coding	leucine rich repeat containing 37B [Source:HGNC Symbol;Acc:HGNC:29070]	-
ENSG00000144644	160.156	333.25	-1.04958	3.71e-11	1.95e-09	GADL1	3	30726200	30894765	-	7330	protein_coding	glutamate decarboxylase like 1 [Source:HGNC Symbol;Acc:HGNC:27949]	-
ENSG00000012061	1120.35	666.619	0.747401	3.71e-11	1.95e-09	ERCC1	19	45407333	45478828	-	5576	protein_coding	ERCC excision repair 1, endonuclease non-catalytic subunit [Source:HGNC Symbol;Acc:HGNC:3433]	-
ENSG00000188522	684.834	230.962	1.56521	3.78e-11	1.98e-09	FAM83G	17	18968789	19004804	-	7876	protein_coding	family with sequence similarity 83 member G [Source:HGNC Symbol;Acc:HGNC:32554]	-
ENSG00000182718	4788.2	2592.13	0.885349	3.81e-11	1.99e-09	ANXA2	15	60347134	60402883	-	8824	protein_coding	annexin A2 [Source:HGNC Symbol;Acc:HGNC:537]	-
ENSG00000138413	363.89	940.573	-1.36639	3.89e-11	2.03e-09	IDH1	2	208236227	208266074	-	4721	protein_coding	isocitrate dehydrogenase (NADP(+)) 1, cytosolic [Source:HGNC Symbol;Acc:HGNC:5382]	-
ENSG00000144381	5387.58	9369.94	-0.798157	4.25e-11	2.21e-09	HSPD1	2	197486581	197516737	-	4245	protein_coding	heat shock protein family D (Hsp60) member 1 [Source:HGNC Symbol;Acc:HGNC:5261]	-
ENSG00000169429	1654.57	71.9085	4.52393	4.51e-11	2.34e-09	CXCL8	4	73740506	73743716	+	2274	protein_coding	C-X-C motif chemokine ligand 8 [Source:HGNC Symbol;Acc:HGNC:6025]	-
ENSG00000143878	1347.04	716.561	0.909577	4.68e-11	2.42e-09	RHOB	2	20447074	20449445	+	2372	protein_coding	ras homolog family member B [Source:HGNC Symbol;Acc:HGNC:668]	-
ENSG00000237187	181.894	72.7417	1.3207	4.72e-11	2.44e-09	NR2F1-AS1	5	93409359	93585648	-	7720	antisense	NR2F1 antisense RNA 1 [Source:HGNC Symbol;Acc:HGNC:48622]	-
ENSG00000155380	1927.67	3177.67	-0.720662	4.79e-11	2.47e-09	SLC16A1	1	112911847	112957013	-	5312	protein_coding	solute carrier family 16 member 1 [Source:HGNC Symbol;Acc:HGNC:10922]	-
ENSG00000196628	680.338	1202.29	-0.819979	4.95e-11	2.54e-09	TCF4	18	55222331	55664787	-	27828	protein_coding	transcription factor 4 [Source:HGNC Symbol;Acc:HGNC:11634]	bHLH
ENSG00000103994	671.13	1168.33	-0.800745	4.99e-11	2.56e-09	ZNF106	15	42412823	42491141	-	12226	protein_coding	zinc finger protein 106 [Source:HGNC Symbol;Acc:HGNC:12886]	-
ENSG00000174791	510.444	189.131	1.43408	5.12e-11	2.62e-09	RIN1	11	66330242	66336840	-	5469	protein_coding	Ras and Rab interactor 1 [Source:HGNC Symbol;Acc:HGNC:18749]	-
ENSG00000138759	97.6283	419.662	-2.09175	5.49e-11	2.8e-09	FRAS1	4	78057570	78544269	+	18960	protein_coding	Fraser extracellular matrix complex subunit 1 [Source:HGNC Symbol;Acc:HGNC:19185]	-
ENSG00000121297	252.345	116.828	1.11549	5.5e-11	2.8e-09	TSHZ3	19	31274945	31349547	-	5817	protein_coding	teashirt zinc finger homeobox 3 [Source:HGNC Symbol;Acc:HGNC:30700]	zf-C2H2
ENSG00000070061	711.815	1189.62	-0.739188	5.52e-11	2.8e-09	ELP1	9	108867517	108934116	-	6048	protein_coding	elongator complex protein 1 [Source:HGNC Symbol;Acc:HGNC:5959]	-
ENSG00000173065	359.767	181.211	0.99477	5.79e-11	2.94e-09	FAM222B	17	28755978	28855232	-	5514	protein_coding	family with sequence similarity 222 member B [Source:HGNC Symbol;Acc:HGNC:25563]	-
ENSG00000163395	68.7711	5.19692	3.72702	5.98e-11	3.02e-09	IGFN1	1	201190825	201228952	+	12116	protein_coding	immunoglobulin-like and fibronectin type III domain containing 1 [Source:HGNC Symbol;Acc:HGNC:24607]	-
ENSG00000100234	332.847	643.26	-0.95564	6.13e-11	3.09e-09	TIMP3	22	32801701	32863043	+	4603	protein_coding	TIMP metallopeptidase inhibitor 3 [Source:HGNC Symbol;Acc:HGNC:11822]	-
ENSG00000142731	313.124	746.753	-1.24969	6.28e-11	3.16e-09	PLK4	4	127880861	127899195	+	4482	protein_coding	polo like kinase 4 [Source:HGNC Symbol;Acc:HGNC:11397]	-
ENSG00000124216	212.24	108.945	0.962154	6.29e-11	3.16e-09	SNAI1	20	49982999	49988886	+	1686	protein_coding	snail family transcriptional repressor 1 [Source:HGNC Symbol;Acc:HGNC:11128]	zf-C2H2
ENSG00000134247	929.358	1490.48	-0.683344	6.48e-11	3.25e-09	PTGFRN	1	116910057	116990358	+	6352	protein_coding	prostaglandin F2 receptor inhibitor [Source:HGNC Symbol;Acc:HGNC:9601]	-
ENSG00000145216	470.995	280.026	0.749617	6.71e-11	3.35e-09	FIP1L1	4	53377643	53460861	+	5636	protein_coding	factor interacting with PAPOLA and CPSF1 [Source:HGNC Symbol;Acc:HGNC:19124]	-
ENSG00000012211	232.77	90.6458	1.35258	7.04e-11	3.51e-09	PRICKLE3	X	49175264	49186528	-	3194	protein_coding	prickle planar cell polarity protein 3 [Source:HGNC Symbol;Acc:HGNC:6645]	-
ENSG00000125826	638.312	347.6	0.874403	7.28e-11	3.62e-09	RBCK1	20	407498	430966	+	4024	protein_coding	RANBP2-type and C3HC4-type zinc finger containing 1 [Source:HGNC Symbol;Acc:HGNC:15864]	-
ENSG00000105287	454.72	193.347	1.2366	7.36e-11	3.65e-09	PRKD2	19	46674275	46717127	-	5446	protein_coding	protein kinase D2 [Source:HGNC Symbol;Acc:HGNC:17293]	-
ENSG00000159164	374.956	634.301	-0.759359	7.54e-11	3.73e-09	SV2A	1	149903318	149917882	-	4824	protein_coding	synaptic vesicle glycoprotein 2A [Source:HGNC Symbol;Acc:HGNC:20566]	-
ENSG00000177301	139.517	370.505	-1.41295	7.58e-11	3.75e-09	KCNA2	1	110519837	110631474	-	17379	protein_coding	potassium voltage-gated channel subfamily A member 2 [Source:HGNC Symbol;Acc:HGNC:6220]	-
ENSG00000143079	769.883	326.753	1.23868	7.67e-11	3.78e-09	CTTNBP2NL	1	112396181	112463456	+	7404	protein_coding	CTTNBP2 N-terminal like [Source:HGNC Symbol;Acc:HGNC:25330]	-
ENSG00000123600	205.962	409.802	-0.999325	7.89e-11	3.87e-09	METTL8	2	171317405	171434802	-	10074	protein_coding	methyltransferase like 8 [Source:HGNC Symbol;Acc:HGNC:25856]	-
ENSG00000146674	1618.01	82.4337	4.29536	7.89e-11	3.87e-09	IGFBP3	7	45912245	45921874	-	4571	protein_coding	insulin like growth factor binding protein 3 [Source:HGNC Symbol;Acc:HGNC:5472]	-
ENSG00000134243	728.49	1376.35	-0.920659	7.92e-11	3.88e-09	SORT1	1	109309568	109397951	-	9160	protein_coding	sortilin 1 [Source:HGNC Symbol;Acc:HGNC:11186]	-
ENSG00000234585	134.485	41.5382	1.68858	8.02e-11	3.92e-09	CCT6P3	7	65038354	65074713	+	3920	transcribed_unprocessed_pseudogene	chaperonin containing TCP1 subunit 6 pseudogene 3 [Source:HGNC Symbol;Acc:HGNC:35137]	-
ENSG00000012048	300.722	672.341	-1.15842	8.09e-11	3.94e-09	BRCA1	17	43044295	43170245	-	9187	protein_coding	BRCA1, DNA repair associated [Source:HGNC Symbol;Acc:HGNC:1100]	-
ENSG00000176641	499.767	849.559	-0.764822	8.72e-11	4.24e-09	RNF152	18	61808063	61894247	-	10632	protein_coding	ring finger protein 152 [Source:HGNC Symbol;Acc:HGNC:26811]	-
ENSG00000221963	152.689	360.175	-1.22906	8.73e-11	4.24e-09	APOL6	22	35648395	35668409	+	10121	protein_coding	apolipoprotein L6 [Source:HGNC Symbol;Acc:HGNC:14870]	-
ENSG00000055332	763.161	1327.98	-0.797576	9.11e-11	4.41e-09	EIF2AK2	2	37099210	37157065	-	10753	protein_coding	eukaryotic translation initiation factor 2 alpha kinase 2 [Source:HGNC Symbol;Acc:HGNC:9437]	-
ENSG00000116741	1677.15	568.422	1.56209	9.15e-11	4.42e-09	RGS2	1	192809039	192812283	+	2096	protein_coding	regulator of G protein signaling 2 [Source:HGNC Symbol;Acc:HGNC:9998]	-
ENSG00000144824	773.303	1492.37	-0.946016	9.56e-11	4.61e-09	PHLDB2	3	111732497	111976517	+	12309	protein_coding	pleckstrin homology like domain family B member 2 [Source:HGNC Symbol;Acc:HGNC:29573]	-
ENSG00000072501	1171.44	1975.76	-0.754	9.83e-11	4.73e-09	SMC1A	X	53374149	53422728	-	10484	protein_coding	structural maintenance of chromosomes 1A [Source:HGNC Symbol;Acc:HGNC:11111]	-
ENSG00000105085	171.44	69.9207	1.28909	1.05e-10	5.03e-09	MED26	19	16574907	16629062	-	5330	protein_coding	mediator complex subunit 26 [Source:HGNC Symbol;Acc:HGNC:2376]	-
ENSG00000149218	294.224	616.308	-1.06398	1.07e-10	5.13e-09	ENDOD1	11	95089810	95132645	+	4687	protein_coding	endonuclease domain containing 1 [Source:HGNC Symbol;Acc:HGNC:29129]	-
ENSG00000241852	127.88	56.2481	1.1799	1.09e-10	5.23e-09	C8orf58	8	22599601	22604150	+	3317	protein_coding	chromosome 8 open reading frame 58 [Source:HGNC Symbol;Acc:HGNC:32233]	-
ENSG00000188529	1673.74	2907.07	-0.796674	1.15e-10	5.49e-09	SRSF10	1	23964804	23980927	-	10277	protein_coding	serine and arginine rich splicing factor 10 [Source:HGNC Symbol;Acc:HGNC:16713]	-
ENSG00000196890	43.1371	8.28873	2.36132	1.16e-10	5.5e-09	HIST3H2BB	1	228458107	228460470	+	2364	protein_coding	histone cluster 3 H2B family member b [Source:HGNC Symbol;Acc:HGNC:20514]	-
ENSG00000164610	564.389	266.171	1.08329	1.3e-10	6.17e-09	RP9	7	33094797	33109401	-	1898	protein_coding	RP9, pre-mRNA splicing factor [Source:HGNC Symbol;Acc:HGNC:10288]	-
ENSG00000176102	641.59	1096.89	-0.770818	1.34e-10	6.35e-09	CSTF3	11	33077188	33162371	-	4513	protein_coding	cleavage stimulation factor subunit 3 [Source:HGNC Symbol;Acc:HGNC:2485]	-
ENSG00000068323	834.77	420.758	0.986302	1.36e-10	6.42e-09	TFE3	X	49028726	49043486	-	4283	protein_coding	transcription factor binding to IGHM enhancer 3 [Source:HGNC Symbol;Acc:HGNC:11752]	bHLH
ENSG00000157193	523.911	1126.14	-1.10682	1.41e-10	6.64e-09	LRP8	1	53242364	53328070	-	10263	protein_coding	LDL receptor related protein 8 [Source:HGNC Symbol;Acc:HGNC:6700]	-
ENSG00000163132	284.063	151.408	0.904699	1.57e-10	7.4e-09	MSX1	4	4859666	4863936	+	2120	protein_coding	msh homeobox 1 [Source:HGNC Symbol;Acc:HGNC:7391]	Homeobox
ENSG00000271503	28.12	0.900957	4.94532	1.59e-10	7.47e-09	CCL5	17	35871491	35880793	-	1512	protein_coding	C-C motif chemokine ligand 5 [Source:HGNC Symbol;Acc:HGNC:10632]	-
ENSG00000101255	397.297	173.023	1.19517	1.61e-10	7.51e-09	TRIB3	20	362835	397559	+	3434	protein_coding	tribbles pseudokinase 3 [Source:HGNC Symbol;Acc:HGNC:16228]	-
ENSG00000272645	144.341	52.7251	1.4552	1.61e-10	7.51e-09	GTF2IP20	1	223951394	223992594	-	4145	transcribed_unprocessed_pseudogene	general transcription factor IIi pseudogene 20 [Source:HGNC Symbol;Acc:HGNC:51732]	-
ENSG00000144354	556.989	1096.73	-0.980148	1.62e-10	7.55e-09	CDCA7	2	173354820	173368997	+	3934	protein_coding	cell division cycle associated 7 [Source:HGNC Symbol;Acc:HGNC:14628]	-
ENSG00000260398	6.30859	59.8241	-3.28218	1.72e-10	7.98e-09	AC068700.1	8	78605952	78609705	+	3754	sense_overlapping	novel transcript, overlapping to PKIA	-
ENSG00000170624	158.131	469.315	-1.56059	1.72e-10	8e-09	SGCD	5	155870344	156767788	+	10584	protein_coding	sarcoglycan delta [Source:HGNC Symbol;Acc:HGNC:10807]	-
ENSG00000163257	239.544	520.414	-1.11273	1.75e-10	8.11e-09	DCAF16	4	17800655	17810758	-	4816	protein_coding	DDB1 and CUL4 associated factor 16 [Source:HGNC Symbol;Acc:HGNC:25987]	-
ENSG00000186660	455.568	969.221	-1.08986	1.76e-10	8.14e-09	ZFP91	11	58579111	58621042	+	5220	protein_coding	ZFP91 zinc finger protein [Source:HGNC Symbol;Acc:HGNC:14983]	zf-C2H2
ENSG00000081842	58.6337	156.633	-1.41682	1.82e-10	8.4e-09	PCDHA6	5	140827958	141012344	+	6133	protein_coding	protocadherin alpha 6 [Source:HGNC Symbol;Acc:HGNC:8672]	-
ENSG00000080845	938.66	521.339	0.850244	1.83e-10	8.43e-09	DLGAP4	20	36306336	36528637	+	8789	protein_coding	DLG associated protein 4 [Source:HGNC Symbol;Acc:HGNC:24476]	-
ENSG00000095587	225.724	404.334	-0.837553	1.85e-10	8.49e-09	TLL2	10	96364606	96513918	-	8151	protein_coding	tolloid like 2 [Source:HGNC Symbol;Acc:HGNC:11844]	-
ENSG00000281344	39.984	123.197	-1.61805	1.86e-10	8.52e-09	HELLPAR	12	102197585	102402596	+	205012	macro_lncRNA	HELLP associated long non-coding RNA [Source:HGNC Symbol;Acc:HGNC:43984]	-
ENSG00000083857	1779.01	2770.44	-0.639425	1.92e-10	8.8e-09	FAT1	4	186587783	186726722	-	16177	protein_coding	FAT atypical cadherin 1 [Source:HGNC Symbol;Acc:HGNC:3595]	-
ENSG00000177570	76.5073	207.738	-1.42521	1.95e-10	8.91e-09	SAMD12	8	118189455	118622112	-	15378	protein_coding	sterile alpha motif domain containing 12 [Source:HGNC Symbol;Acc:HGNC:31750]	-
ENSG00000117036	894.85	416.437	1.10544	2e-10	9.11e-09	ETV3	1	157121191	157138474	-	6707	protein_coding	ETS variant 3 [Source:HGNC Symbol;Acc:HGNC:3492]	ETS
ENSG00000102384	111.983	236.441	-1.0819	2.2e-10	1e-08	CENPI	X	101098218	101163681	+	4321	protein_coding	centromere protein I [Source:HGNC Symbol;Acc:HGNC:3968]	-
ENSG00000257270	5.56017	41.436	-2.90777	2.29e-10	1.04e-08	AL928654.2	14	105467793	105470617	-	445	antisense	novel transcript, antisense to MTA1	-
ENSG00000035499	294.495	508.507	-0.78651	2.39e-10	1.08e-08	DEPDC1B	5	60596912	60700190	-	3806	protein_coding	DEP domain containing 1B [Source:HGNC Symbol;Acc:HGNC:24902]	-
ENSG00000142867	958.165	296.498	1.69397	2.39e-10	1.08e-08	BCL10	1	85265776	85276904	-	4618	protein_coding	B cell CLL/lymphoma 10 [Source:HGNC Symbol;Acc:HGNC:989]	-
ENSG00000101126	794.251	1480.52	-0.897128	2.41e-10	1.09e-08	ADNP	20	50888916	50931421	-	8423	protein_coding	activity dependent neuroprotector homeobox [Source:HGNC Symbol;Acc:HGNC:15766]	Homeobox
ENSG00000176845	455.55	212.585	1.09785	2.49e-10	1.12e-08	METRNL	17	83079691	83095119	+	2626	protein_coding	meteorin like, glial cell differentiation regulator [Source:HGNC Symbol;Acc:HGNC:27584]	-
ENSG00000110046	685.121	286.833	1.25493	2.53e-10	1.14e-08	ATG2A	11	64894546	64917248	-	7870	protein_coding	autophagy related 2A [Source:HGNC Symbol;Acc:HGNC:29028]	-
ENSG00000142534	14420	7508.98	0.941523	2.54e-10	1.14e-08	RPS11	19	49496365	49499689	+	1390	protein_coding	ribosomal protein S11 [Source:HGNC Symbol;Acc:HGNC:10384]	-
ENSG00000188662	27.4812	96.3301	-1.83764	2.55e-10	1.14e-08	HILS1	17	50171428	50181178	-	1219	transcribed_unitary_pseudogene	histone linker H1 domain, spermatid-specific 1 (pseudogene) [Source:HGNC Symbol;Acc:HGNC:30616]	-
ENSG00000150457	294.484	116.052	1.33775	2.57e-10	1.15e-08	LATS2	13	20973032	21061547	-	5578	protein_coding	large tumor suppressor kinase 2 [Source:HGNC Symbol;Acc:HGNC:6515]	-
ENSG00000241839	278.579	128.863	1.10714	2.63e-10	1.17e-08	PLEKHO2	15	64841883	64868007	+	3726	protein_coding	pleckstrin homology domain containing O2 [Source:HGNC Symbol;Acc:HGNC:30026]	-
ENSG00000170871	347.161	624.971	-0.845138	2.66e-10	1.18e-08	KIAA0232	4	6781375	6884170	+	8499	protein_coding	KIAA0232 [Source:HGNC Symbol;Acc:HGNC:28992]	-
ENSG00000215883	75.9651	183.682	-1.28722	2.68e-10	1.19e-08	CYB5RL	1	54169651	54200036	-	8926	protein_coding	cytochrome b5 reductase like [Source:HGNC Symbol;Acc:HGNC:32220]	-
ENSG00000198930	576.071	304.036	0.918582	2.84e-10	1.25e-08	CSAG1	X	152727484	152733735	-	1092	protein_coding	chondrosarcoma associated gene 1 [Source:HGNC Symbol;Acc:HGNC:24294]	-
ENSG00000104783	42.9401	5.43132	2.98656	2.87e-10	1.27e-08	KCNN4	19	43766533	43781261	-	3408	protein_coding	potassium calcium-activated channel subfamily N member 4 [Source:HGNC Symbol;Acc:HGNC:6293]	-
ENSG00000073050	507.716	255.811	0.98493	2.96e-10	1.3e-08	XRCC1	19	43543040	43580473	-	3459	protein_coding	X-ray repair cross complementing 1 [Source:HGNC Symbol;Acc:HGNC:12828]	-
ENSG00000198521	229.572	541.868	-1.23567	3e-10	1.32e-08	ZNF43	19	21804949	21852125	-	8649	protein_coding	zinc finger protein 43 [Source:HGNC Symbol;Acc:HGNC:13109]	zf-C2H2
ENSG00000279457	257.607	120.187	1.09406	3e-10	1.32e-08	FO538757.1	1	185217	195411	-	1397	unprocessed_pseudogene	WAS protein family homolog 2-like [Source:NCBI gene;Acc:102723897]	-
ENSG00000152990	641.643	1399.88	-1.12828	3.05e-10	1.33e-08	ADGRA3	4	22345071	22516054	-	9250	protein_coding	adhesion G protein-coupled receptor A3 [Source:HGNC Symbol;Acc:HGNC:13839]	-
ENSG00000132109	220.198	102.472	1.10054	3.14e-10	1.37e-08	TRIM21	11	4384897	4393696	-	1929	protein_coding	tripartite motif containing 21 [Source:HGNC Symbol;Acc:HGNC:11312]	-
ENSG00000106089	581.089	168.555	1.78816	3.71e-10	1.62e-08	STX1A	7	73699206	73719672	-	3693	protein_coding	syntaxin 1A [Source:HGNC Symbol;Acc:HGNC:11433]	-
ENSG00000101457	1017.58	541.519	0.910171	3.86e-10	1.68e-08	DNTTIP1	20	45791937	45811427	+	1883	protein_coding	deoxynucleotidyltransferase terminal interacting protein 1 [Source:HGNC Symbol;Acc:HGNC:16160]	-
ENSG00000154781	476.261	236.796	1.00749	3.9e-10	1.69e-08	CCDC174	3	14651746	14672659	+	3556	protein_coding	coiled-coil domain containing 174 [Source:HGNC Symbol;Acc:HGNC:28033]	-
ENSG00000189403	3608.17	6226.67	-0.786855	3.94e-10	1.71e-08	HMGB1	13	30456704	30617597	-	7723	protein_coding	high mobility group box 1 [Source:HGNC Symbol;Acc:HGNC:4983]	HMG
ENSG00000171388	88.6336	13.2744	2.74562	4.13e-10	1.79e-08	APLN	X	129645259	129654937	-	3205	protein_coding	apelin [Source:HGNC Symbol;Acc:HGNC:16665]	-
ENSG00000213976	8.85145	77.8306	-3.06836	4.25e-10	1.83e-08	AC010615.1	19	21382865	21387177	+	1764	unprocessed_pseudogene	zinc finger protein pseudogene	-
ENSG00000105722	1116.71	376.979	1.5652	4.38e-10	1.89e-08	ERF	19	42247572	42255157	-	3295	protein_coding	ETS2 repressor factor [Source:HGNC Symbol;Acc:HGNC:3444]	ETS
ENSG00000112984	868.856	1737.12	-1.0012	4.43e-10	1.9e-08	KIF20A	5	138178719	138187715	+	3958	protein_coding	kinesin family member 20A [Source:HGNC Symbol;Acc:HGNC:9787]	-
ENSG00000185009	644.586	1175.08	-0.864733	4.51e-10	1.93e-08	AP3M1	10	74120255	74151063	-	5912	protein_coding	adaptor related protein complex 3 subunit mu 1 [Source:HGNC Symbol;Acc:HGNC:569]	-
ENSG00000174695	1016.87	1949.7	-0.937252	4.56e-10	1.95e-08	TMEM167A	5	83052846	83077863	-	4908	protein_coding	transmembrane protein 167A [Source:HGNC Symbol;Acc:HGNC:28330]	-
ENSG00000104897	1820.16	578.667	1.65228	4.56e-10	1.95e-08	SF3A2	19	2236504	2248679	+	3134	protein_coding	splicing factor 3a subunit 2 [Source:HGNC Symbol;Acc:HGNC:10766]	-
ENSG00000172927	212.065	91.7618	1.20531	4.61e-10	1.97e-08	MYEOV	11	69294138	69367726	+	3760	protein_coding	myeloma overexpressed [Source:HGNC Symbol;Acc:HGNC:7563]	-
ENSG00000148848	609.872	1293.74	-1.0878	4.77e-10	2.03e-08	ADAM12	10	126012381	126388455	-	9860	protein_coding	ADAM metallopeptidase domain 12 [Source:HGNC Symbol;Acc:HGNC:190]	-
ENSG00000169016	238.681	470.728	-0.98769	4.78e-10	2.03e-08	E2F6	2	11444375	11466177	-	4067	protein_coding	E2F transcription factor 6 [Source:HGNC Symbol;Acc:HGNC:3120]	E2F
ENSG00000152684	588.445	373.287	0.655384	4.79e-10	2.03e-08	PELO	5	52787940	52804046	+	4349	protein_coding	pelota mRNA surveillance and ribosome rescue factor [Source:HGNC Symbol;Acc:HGNC:8829]	-
ENSG00000132300	920.411	1680.54	-0.867141	4.84e-10	2.05e-08	PTCD3	2	86106182	86142157	+	10164	protein_coding	pentatricopeptide repeat domain 3 [Source:HGNC Symbol;Acc:HGNC:24717]	-
ENSG00000150756	107.974	222.463	-1.03918	5.04e-10	2.13e-08	FAM173B	5	10226330	10249897	-	2462	protein_coding	family with sequence similarity 173 member B [Source:HGNC Symbol;Acc:HGNC:27029]	-
ENSG00000185615	77.5753	23.4338	1.72271	5.07e-10	2.13e-08	PDIA2	16	283152	287215	+	2248	protein_coding	protein disulfide isomerase family A member 2 [Source:HGNC Symbol;Acc:HGNC:14180]	-
ENSG00000140093	2.19374	33.3999	-3.91851	5.19e-10	2.18e-08	SERPINA10	14	94280455	94293271	-	5472	protein_coding	serpin family A member 10 [Source:HGNC Symbol;Acc:HGNC:15996]	-
ENSG00000198858	854.899	427.926	0.996569	5.47e-10	2.3e-08	R3HDM4	19	896503	913245	-	2957	protein_coding	R3H domain containing 4 [Source:HGNC Symbol;Acc:HGNC:28270]	-
ENSG00000199080	1.79044	35.1176	-4.3947	5.6e-10	2.35e-08	MIR133B	6	52148923	52149041	+	119	miRNA	microRNA 133b [Source:HGNC Symbol;Acc:HGNC:31759]	-
ENSG00000122778	410.628	721.911	-0.814959	5.68e-10	2.38e-08	KIAA1549	7	138831381	138981318	-	12427	protein_coding	KIAA1549 [Source:HGNC Symbol;Acc:HGNC:22219]	-
ENSG00000231991	277.295	138.931	0.997474	5.85e-10	2.44e-08	ANXA2P2	9	33624274	33625293	+	1020	processed_pseudogene	annexin A2 pseudogene 2 [Source:HGNC Symbol;Acc:HGNC:539]	-
ENSG00000175130	2338.61	4387.25	-0.908502	5.93e-10	2.47e-08	MARCKSL1	1	32333832	32336379	-	1699	protein_coding	MARCKS like 1 [Source:HGNC Symbol;Acc:HGNC:7142]	-
ENSG00000104549	1157.56	2169.57	-0.90461	6.14e-10	2.55e-08	SQLE	8	124998497	125022283	+	4305	protein_coding	squalene epoxidase [Source:HGNC Symbol;Acc:HGNC:11279]	-
ENSG00000069020	57.0688	16.7918	1.77463	6.21e-10	2.58e-08	MAST4	5	66596361	67169595	+	14675	protein_coding	microtubule associated serine/threonine kinase family member 4 [Source:HGNC Symbol;Acc:HGNC:19037]	-
ENSG00000132823	1220.8	504.18	1.27477	6.4e-10	2.65e-08	OSER1	20	44196496	44210791	-	1712	protein_coding	oxidative stress responsive serine rich 1 [Source:HGNC Symbol;Acc:HGNC:16105]	-
ENSG00000184205	647.417	403.556	0.681532	6.63e-10	2.74e-08	TSPYL2	X	53082367	53088540	+	4948	protein_coding	TSPY like 2 [Source:HGNC Symbol;Acc:HGNC:24358]	-
ENSG00000112062	380.225	714.98	-0.912544	6.65e-10	2.75e-08	MAPK14	6	36027677	36111236	+	6860	protein_coding	mitogen-activated protein kinase 14 [Source:HGNC Symbol;Acc:HGNC:6876]	-
ENSG00000175573	379.928	147.09	1.36376	7.21e-10	2.97e-08	C11orf68	11	65916808	65919117	-	1761	protein_coding	chromosome 11 open reading frame 68 [Source:HGNC Symbol;Acc:HGNC:28801]	-
ENSG00000158246	192.208	81.4855	1.23101	7.32e-10	3.01e-08	TENT5B	1	27005020	27012836	-	2368	protein_coding	terminal nucleotidyltransferase 5B [Source:HGNC Symbol;Acc:HGNC:28273]	-
ENSG00000177943	313.618	90.8827	1.78232	7.35e-10	3.01e-08	MAMDC4	9	136850943	136860799	+	5469	protein_coding	MAM domain containing 4 [Source:HGNC Symbol;Acc:HGNC:24083]	-
ENSG00000132716	171.704	340.061	-0.987609	7.36e-10	3.01e-08	DCAF8	1	160215715	160262531	-	7587	protein_coding	DDB1 and CUL4 associated factor 8 [Source:HGNC Symbol;Acc:HGNC:24891]	-
ENSG00000083828	217.404	98.3465	1.14758	7.39e-10	3.02e-08	ZNF586	19	57769655	57819939	+	3261	protein_coding	zinc finger protein 586 [Source:HGNC Symbol;Acc:HGNC:25949]	zf-C2H2
ENSG00000088387	227.323	514.947	-1.17265	7.44e-10	3.03e-08	DOCK9	13	98793429	99086625	-	14816	protein_coding	dedicator of cytokinesis 9 [Source:HGNC Symbol;Acc:HGNC:14132]	-
ENSG00000103485	1417.83	2185.33	-0.624628	7.44e-10	3.03e-08	QPRT	16	29679008	29698699	+	3642	protein_coding	quinolinate phosphoribosyltransferase [Source:HGNC Symbol;Acc:HGNC:9755]	-
ENSG00000158560	102.676	195.611	-0.926059	7.62e-10	3.1e-08	DYNC1I1	7	95772506	96110322	+	4568	protein_coding	dynein cytoplasmic 1 intermediate chain 1 [Source:HGNC Symbol;Acc:HGNC:2963]	-
ENSG00000160131	260.802	519.115	-0.987544	7.64e-10	3.1e-08	VMA21	X	151396515	151409364	+	5109	protein_coding	VMA21, vacuolar ATPase assembly factor [Source:HGNC Symbol;Acc:HGNC:22082]	-
ENSG00000146676	632.856	1345.68	-1.09111	7.67e-10	3.1e-08	PURB	7	44876293	44885361	-	9069	protein_coding	purine rich element binding protein B [Source:HGNC Symbol;Acc:HGNC:9702]	Others
ENSG00000230590	53.4569	201.183	-1.89655	7.95e-10	3.21e-08	FTX	X	73946555	74293574	-	28487	lincRNA	FTX transcript, XIST regulator [Source:HGNC Symbol;Acc:HGNC:37190]	-
ENSG00000112276	709.944	1247.19	-0.810629	8.41e-10	3.39e-08	BVES	6	105096822	105137174	-	5808	protein_coding	blood vessel epicardial substance [Source:HGNC Symbol;Acc:HGNC:1152]	-
ENSG00000065361	287.246	584.865	-1.02571	8.48e-10	3.41e-08	ERBB3	12	56076799	56103505	+	9039	protein_coding	erb-b2 receptor tyrosine kinase 3 [Source:HGNC Symbol;Acc:HGNC:3431]	-
ENSG00000183530	342.908	644.714	-0.908562	8.76e-10	3.52e-08	PRR14L	22	31676256	31750140	-	11809	protein_coding	proline rich 14 like [Source:HGNC Symbol;Acc:HGNC:28738]	-
ENSG00000160908	297.811	132.852	1.16002	8.96e-10	3.59e-08	ZNF394	7	99486519	99500324	-	3505	protein_coding	zinc finger protein 394 [Source:HGNC Symbol;Acc:HGNC:18832]	zf-C2H2
ENSG00000141404	109.151	261.857	-1.24998	8.98e-10	3.59e-08	GNAL	18	11688956	11885685	+	8445	protein_coding	G protein subunit alpha L [Source:HGNC Symbol;Acc:HGNC:4388]	-
ENSG00000133818	562.367	368.06	0.611154	9.05e-10	3.62e-08	RRAS2	11	14277926	14364506	-	3453	protein_coding	RAS related 2 [Source:HGNC Symbol;Acc:HGNC:17271]	-
ENSG00000179406	227.708	87.4029	1.38012	9.19e-10	3.67e-08	LINC00174	7	66376044	66493566	-	11354	processed_transcript	long intergenic non-protein coding RNA 174 [Source:HGNC Symbol;Acc:HGNC:27788]	-
ENSG00000162783	1080.27	529.386	1.02851	9.34e-10	3.72e-08	IER5	1	181088712	181092899	+	4188	protein_coding	immediate early response 5 [Source:HGNC Symbol;Acc:HGNC:5393]	-
ENSG00000100209	129.689	51.8595	1.32739	9.48e-10	3.77e-08	HSCB	22	28742031	28757515	+	1462	protein_coding	HscB mitochondrial iron-sulfur cluster cochaperone [Source:HGNC Symbol;Acc:HGNC:28913]	-
ENSG00000167552	3132.38	8111.7	-1.37309	9.82e-10	3.9e-08	TUBA1A	12	49184796	49189324	-	3421	protein_coding	tubulin alpha 1a [Source:HGNC Symbol;Acc:HGNC:20766]	-
ENSG00000125734	434.205	259.68	0.739579	9.93e-10	3.93e-08	GPR108	19	6729914	6737603	-	3213	protein_coding	G protein-coupled receptor 108 [Source:HGNC Symbol;Acc:HGNC:17829]	-
ENSG00000143067	503.568	228.535	1.14219	1.01e-09	4e-08	ZNF697	1	119619422	119647773	-	5041	protein_coding	zinc finger protein 697 [Source:HGNC Symbol;Acc:HGNC:32034]	zf-C2H2
ENSG00000134058	488.347	233.887	1.06575	1.02e-09	4e-08	CDK7	5	69234795	69277430	+	2416	protein_coding	cyclin dependent kinase 7 [Source:HGNC Symbol;Acc:HGNC:1778]	-
ENSG00000172403	512.877	1062.06	-1.05314	1.02e-09	4e-08	SYNPO2	4	118850688	119061247	+	14034	protein_coding	synaptopodin 2 [Source:HGNC Symbol;Acc:HGNC:17732]	-
ENSG00000103507	640.194	315.082	1.02408	1.1e-09	4.33e-08	BCKDK	16	31106107	31112791	+	3873	protein_coding	branched chain ketoacid dehydrogenase kinase [Source:HGNC Symbol;Acc:HGNC:16902]	-
ENSG00000104859	1344.38	533.315	1.33261	1.13e-09	4.44e-08	CLASRP	19	45039040	45070956	+	4931	protein_coding	CLK4 associating serine/arginine rich protein [Source:HGNC Symbol;Acc:HGNC:17731]	-
ENSG00000213516	221.89	468.949	-1.07254	1.17e-09	4.58e-08	RBMXL1	1	88979456	88992960	-	5087	protein_coding	RBMX like 1 [Source:HGNC Symbol;Acc:HGNC:25073]	-
ENSG00000182168	463.972	834.672	-0.850552	1.21e-09	4.72e-08	UNC5C	4	95162504	95549206	-	10685	protein_coding	unc-5 netrin receptor C [Source:HGNC Symbol;Acc:HGNC:12569]	-
ENSG00000181404	122.318	47.1635	1.3679	1.34e-09	5.24e-08	WASHC1	9	14521	73865	-	2270	protein_coding	WASH complex subunit 1 [Source:HGNC Symbol;Acc:HGNC:24361]	-
ENSG00000183207	2330.63	1456.13	0.677685	1.35e-09	5.26e-08	RUVBL2	19	48993448	49015995	+	3670	protein_coding	RuvB like AAA ATPase 2 [Source:HGNC Symbol;Acc:HGNC:10475]	-
ENSG00000135052	990.02	1583.24	-0.675673	1.36e-09	5.29e-08	GOLM1	9	86026146	86100173	-	4233	protein_coding	golgi membrane protein 1 [Source:HGNC Symbol;Acc:HGNC:15451]	-
ENSG00000204967	27.1502	83.3029	-1.62027	1.39e-09	5.4e-08	PCDHA4	5	140806929	141012344	+	13440	protein_coding	protocadherin alpha 4 [Source:HGNC Symbol;Acc:HGNC:8670]	-
ENSG00000121579	1517.76	2331.07	-0.618313	1.4e-09	5.4e-08	NAA50	3	113716460	113746300	-	6436	protein_coding	N(alpha)-acetyltransferase 50, NatE catalytic subunit [Source:HGNC Symbol;Acc:HGNC:29533]	-
ENSG00000104885	1557.82	689.407	1.17548	1.4e-09	5.4e-08	DOT1L	19	2164149	2232578	+	11272	protein_coding	DOT1 like histone lysine methyltransferase [Source:HGNC Symbol;Acc:HGNC:24948]	-
ENSG00000213654	108.21	36.5133	1.56497	1.42e-09	5.46e-08	GPSM3	6	32190766	32195523	-	1854	protein_coding	G protein signaling modulator 3 [Source:HGNC Symbol;Acc:HGNC:13945]	-
ENSG00000223749	70.354	212.578	-1.61178	1.44e-09	5.56e-08	MIR503HG	X	134543337	134546632	-	1678	lincRNA	MIR503 host gene [Source:HGNC Symbol;Acc:HGNC:28258]	-
ENSG00000157557	657.775	262.466	1.3284	1.45e-09	5.58e-08	ETS2	21	38805307	38824955	+	4595	protein_coding	ETS proto-oncogene 2, transcription factor [Source:HGNC Symbol;Acc:HGNC:3489]	ETS
ENSG00000121152	613.728	1026.84	-0.743865	1.47e-09	5.62e-08	NCAPH	2	96335787	96373845	+	3278	protein_coding	non-SMC condensin I complex subunit H [Source:HGNC Symbol;Acc:HGNC:1112]	-
ENSG00000240356	163.027	73.5798	1.13865	1.47e-09	5.62e-08	RPL23AP7	2	113610502	113627090	-	2128	transcribed_processed_pseudogene	ribosomal protein L23a pseudogene 7 [Source:HGNC Symbol;Acc:HGNC:17336]	-
ENSG00000184678	266.314	89.9691	1.57127	1.47e-09	5.62e-08	HIST2H2BE	1	149884459	149886652	-	2194	protein_coding	histone cluster 2 H2B family member e [Source:HGNC Symbol;Acc:HGNC:4760]	-
ENSG00000197857	222.122	105.525	1.07599	1.48e-09	5.66e-08	ZNF44	19	12224686	12294887	-	6061	protein_coding	zinc finger protein 44 [Source:HGNC Symbol;Acc:HGNC:13110]	zf-C2H2
ENSG00000132846	14.1335	52.5405	-1.91765	1.5e-09	5.74e-08	ZBED3	5	77072072	77087323	-	6514	protein_coding	zinc finger BED-type containing 3 [Source:HGNC Symbol;Acc:HGNC:20711]	zf-BED
ENSG00000155657	1620.95	5777.58	-1.8328	1.53e-09	5.81e-08	TTN	2	178525989	178830802	-	118976	protein_coding	titin [Source:HGNC Symbol;Acc:HGNC:12403]	-
ENSG00000163156	941.233	390.993	1.26527	1.55e-09	5.89e-08	SCNM1	1	151156664	151170297	+	3265	protein_coding	sodium channel modifier 1 [Source:HGNC Symbol;Acc:HGNC:23136]	-
ENSG00000006062	309.03	98.8108	1.63993	1.55e-09	5.89e-08	MAP3K14	17	45263119	45317145	-	5784	protein_coding	mitogen-activated protein kinase kinase kinase 14 [Source:HGNC Symbol;Acc:HGNC:6853]	-
ENSG00000145416	10.6031	97.9056	-3.15233	1.62e-09	6.14e-08	2021-03-01	4	163524298	164384050	-	10421	protein_coding	membrane associated ring-CH-type finger 1 [Source:HGNC Symbol;Acc:HGNC:26077]	-
ENSG00000164032	2528.9	4087.6	-0.693195	1.63e-09	6.17e-08	H2AFZ	4	99948086	99950388	-	2303	protein_coding	H2A histone family member Z [Source:HGNC Symbol;Acc:HGNC:4741]	-
ENSG00000117834	3.48733	35.4951	-3.23149	1.67e-09	6.31e-08	SLC5A9	1	48222685	48248644	+	4535	protein_coding	solute carrier family 5 member 9 [Source:HGNC Symbol;Acc:HGNC:22146]	-
ENSG00000073584	42.4066	132.238	-1.61875	1.69e-09	6.37e-08	SMARCE1	17	40624962	40648864	-	18680	protein_coding	SWI/SNF related, matrix associated, actin dependent regulator of chromatin, subfamily e, member 1 [Source:HGNC Symbol;Acc:HGNC:11109]	HMG
ENSG00000164904	456.252	712.604	-0.645439	1.7e-09	6.4e-08	ALDH7A1	5	126531200	126595418	-	17970	protein_coding	aldehyde dehydrogenase 7 family member A1 [Source:HGNC Symbol;Acc:HGNC:877]	-
ENSG00000125798	59.0562	14.4208	2.03793	1.73e-09	6.48e-08	FOXA2	20	22581005	22585455	-	2603	protein_coding	forkhead box A2 [Source:HGNC Symbol;Acc:HGNC:5022]	Fork
ENSG00000179094	2245.03	734.777	1.6119	1.76e-09	6.61e-08	PER1	17	8140472	8156506	-	7002	protein_coding	period circadian regulator 1 [Source:HGNC Symbol;Acc:HGNC:8845]	-
ENSG00000253719	492.1	868.165	-0.820382	1.81e-09	6.76e-08	ATXN7L3B	12	74537827	74545430	+	7604	protein_coding	ataxin 7 like 3B [Source:HGNC Symbol;Acc:HGNC:37931]	-
ENSG00000162642	855.478	422.852	1.01882	1.81e-09	6.76e-08	C1orf52	1	85249953	85259672	-	3420	protein_coding	chromosome 1 open reading frame 52 [Source:HGNC Symbol;Acc:HGNC:24871]	-
ENSG00000210082	230021	89975.7	1.35416	1.81e-09	6.76e-08	MT-RNR2	MT	1671	3229	+	1559	Mt_rRNA	mitochondrially encoded 16S RNA [Source:HGNC Symbol;Acc:HGNC:7471]	-
ENSG00000117114	1363.92	2334.55	-0.774976	1.89e-09	7.04e-08	ADGRL2	1	81306160	81992436	+	7754	protein_coding	adhesion G protein-coupled receptor L2 [Source:HGNC Symbol;Acc:HGNC:18582]	-
ENSG00000137207	638.289	392.549	0.700663	1.93e-09	7.17e-08	YIPF3	6	43511827	43516990	-	3053	protein_coding	Yip1 domain family member 3 [Source:HGNC Symbol;Acc:HGNC:21023]	-
ENSG00000182253	211.036	388.435	-0.877516	2.08e-09	7.69e-08	SYNM	15	99098217	99135593	+	7819	protein_coding	synemin [Source:HGNC Symbol;Acc:HGNC:24466]	-
ENSG00000102096	209.108	87.1453	1.26825	2.09e-09	7.74e-08	PIM2	X	48913182	48919024	-	2761	protein_coding	Pim-2 proto-oncogene, serine/threonine kinase [Source:HGNC Symbol;Acc:HGNC:8987]	-
ENSG00000188280	5.16879	34.4333	-2.779	2.12e-09	7.83e-08	AC007731.1	22	20338805	20354372	+	2256	antisense	uncharacterized LOC101927859 [Source:NCBI gene;Acc:101927859]	-
ENSG00000110851	812.213	412.195	0.977182	2.17e-09	8e-08	PRDM4	12	107732866	107761272	-	4777	protein_coding	PR/SET domain 4 [Source:HGNC Symbol;Acc:HGNC:9348]	zf-C2H2
ENSG00000102265	1576.14	731.473	1.10867	2.25e-09	8.29e-08	TIMP1	X	47582313	47586789	+	1541	protein_coding	TIMP metallopeptidase inhibitor 1 [Source:HGNC Symbol;Acc:HGNC:11820]	-
ENSG00000137563	565.425	953.128	-0.750617	2.3e-09	8.45e-08	GGH	8	63015079	63039171	-	3130	protein_coding	gamma-glutamyl hydrolase [Source:HGNC Symbol;Acc:HGNC:4248]	-
ENSG00000100077	439.118	831.898	-0.918552	2.34e-09	8.59e-08	GRK3	22	25564849	25729294	+	9303	protein_coding	G protein-coupled receptor kinase 3 [Source:HGNC Symbol;Acc:HGNC:290]	-
ENSG00000076826	147.152	71.4903	1.03782	2.39e-09	8.74e-08	CAMSAP3	19	7595902	7618304	+	4845	protein_coding	calmodulin regulated spectrin associated protein family member 3 [Source:HGNC Symbol;Acc:HGNC:29307]	-
ENSG00000221869	1022.4	383.472	1.41332	2.41e-09	8.8e-08	CEBPD	8	47736909	47739086	-	2178	protein_coding	CCAAT enhancer binding protein delta [Source:HGNC Symbol;Acc:HGNC:1835]	C/EBP
ENSG00000200087	8.46669	66.2838	-3.06608	2.54e-09	9.27e-08	SNORA73B	1	28508559	28508762	+	204	snoRNA	small nucleolar RNA, H/ACA box 73B [Source:HGNC Symbol;Acc:HGNC:10116]	-
ENSG00000105669	1574.54	993.495	0.66317	2.6e-09	9.48e-08	COPE	19	18899514	18919397	-	2885	protein_coding	coatomer protein complex subunit epsilon [Source:HGNC Symbol;Acc:HGNC:2234]	-
ENSG00000176476	296.746	108.428	1.44688	2.64e-09	9.61e-08	SGF29	16	28553915	28591790	+	2124	protein_coding	SAGA complex associated factor 29 [Source:HGNC Symbol;Acc:HGNC:25156]	-
ENSG00000186162	261.935	118.759	1.1349	2.67e-09	9.71e-08	CIDECP	3	10014238	10026365	-	3017	transcribed_unprocessed_pseudogene	cell death-inducing DFFA-like effector c pseudogene [Source:HGNC Symbol;Acc:HGNC:24230]	-
ENSG00000157766	97.0782	301.45	-1.62377	2.76e-09	1e-07	ACAN	15	88803442	88875354	+	10909	protein_coding	aggrecan [Source:HGNC Symbol;Acc:HGNC:319]	-
ENSG00000107338	274.585	128.89	1.08525	2.76e-09	1e-07	SHB	9	37919134	38069211	-	2783	protein_coding	SH2 domain containing adaptor protein B [Source:HGNC Symbol;Acc:HGNC:10838]	-
ENSG00000128595	1179.6	2004.19	-0.76346	2.81e-09	1.02e-07	CALU	7	128739292	128771807	+	4537	protein_coding	calumenin [Source:HGNC Symbol;Acc:HGNC:1458]	-
ENSG00000130294	2477.44	4678.62	-0.917564	2.86e-09	1.03e-07	KIF1A	2	240713761	240821036	-	16695	protein_coding	kinesin family member 1A [Source:HGNC Symbol;Acc:HGNC:888]	-
ENSG00000136114	165.922	78.1234	1.08089	3.19e-09	1.15e-07	THSD1	13	52377167	52416373	-	3705	protein_coding	thrombospondin type 1 domain containing 1 [Source:HGNC Symbol;Acc:HGNC:17754]	-
ENSG00000101935	176.443	425.652	-1.26318	3.21e-09	1.15e-07	AMMECR1	X	110194186	110440233	-	6516	protein_coding	Alport syndrome, mental retardation, midface hypoplasia and elliptocytosis chromosomal region gene 1 [Source:HGNC Symbol;Acc:HGNC:467]	-
ENSG00000139914	212.749	486.216	-1.19567	3.26e-09	1.17e-07	FITM1	14	24131275	24132849	+	1355	protein_coding	fat storage inducing transmembrane protein 1 [Source:HGNC Symbol;Acc:HGNC:33714]	-
ENSG00000100867	50.1715	7.29302	2.76388	3.51e-09	1.26e-07	DHRS2	14	23630115	23645639	+	7556	protein_coding	dehydrogenase/reductase 2 [Source:HGNC Symbol;Acc:HGNC:18349]	-
ENSG00000242498	122.822	247.305	-1.01104	3.63e-09	1.3e-07	ARPIN	15	89895006	89912956	-	8594	protein_coding	actin related protein 2/3 complex inhibitor [Source:HGNC Symbol;Acc:HGNC:28782]	-
ENSG00000158863	556.163	291.099	0.932229	3.64e-09	1.3e-07	FAM160B2	8	22089159	22104898	+	8278	protein_coding	family with sequence similarity 160 member B2 [Source:HGNC Symbol;Acc:HGNC:16492]	-
ENSG00000245522	110.15	18.2559	2.58295	3.79e-09	1.35e-07	AC026250.1	11	9754770	9759533	-	2632	lincRNA	uncharacterized LOC440028 [Source:NCBI gene;Acc:440028]	-
ENSG00000108306	211.375	93.2269	1.18696	3.8e-09	1.35e-07	FBXL20	17	39252644	39402523	-	11079	protein_coding	F-box and leucine rich repeat protein 20 [Source:HGNC Symbol;Acc:HGNC:24679]	-
ENSG00000102119	732.725	410.614	0.833655	4.05e-09	1.44e-07	EMD	X	154379197	154381523	+	2020	protein_coding	emerin [Source:HGNC Symbol;Acc:HGNC:3331]	-
ENSG00000188290	471.521	172.09	1.45368	4.24e-09	1.5e-07	HES4	1	998962	1000172	-	1118	protein_coding	hes family bHLH transcription factor 4 [Source:HGNC Symbol;Acc:HGNC:24149]	bHLH
ENSG00000172273	376.688	212.89	0.820308	4.3e-09	1.52e-07	HINFP	11	119121587	119136044	+	9836	protein_coding	histone H4 transcription factor [Source:HGNC Symbol;Acc:HGNC:17850]	zf-C2H2
ENSG00000225383	160.376	50.977	1.64974	4.33e-09	1.53e-07	SFTA1P	10	10784437	10794980	-	824	lincRNA	surfactant associated 1, pseudogene [Source:HGNC Symbol;Acc:HGNC:18383]	-
ENSG00000124813	396.874	122.998	1.69359	4.35e-09	1.54e-07	RUNX2	6	45328157	45664349	+	8192	protein_coding	runt related transcription factor 2 [Source:HGNC Symbol;Acc:HGNC:10472]	Runt
ENSG00000112972	1023.14	2035.16	-0.99033	4.41e-09	1.56e-07	HMGCS1	5	43289395	43313512	-	4702	protein_coding	3-hydroxy-3-methylglutaryl-CoA synthase 1 [Source:HGNC Symbol;Acc:HGNC:5007]	-
ENSG00000105438	2287.62	1567.84	0.544288	4.98e-09	1.75e-07	KDELR1	19	48382570	48391553	-	2251	protein_coding	KDEL endoplasmic reticulum protein retention receptor 1 [Source:HGNC Symbol;Acc:HGNC:6304]	-
ENSG00000140391	2220.22	3727.12	-0.746886	5.05e-09	1.77e-07	TSPAN3	15	77041404	77083984	-	8506	protein_coding	tetraspanin 3 [Source:HGNC Symbol;Acc:HGNC:17752]	-
ENSG00000067182	851.283	523.307	0.702259	5.06e-09	1.77e-07	TNFRSF1A	12	6328757	6342114	-	4005	protein_coding	TNF receptor superfamily member 1A [Source:HGNC Symbol;Acc:HGNC:11916]	-
ENSG00000108465	40.1031	108.422	-1.41142	5.09e-09	1.78e-07	CDK5RAP3	17	47967810	47981774	+	6070	protein_coding	CDK5 regulatory subunit associated protein 3 [Source:HGNC Symbol;Acc:HGNC:18673]	-
ENSG00000176055	68.3123	166.344	-1.27752	5.1e-09	1.78e-07	MBLAC2	5	90458203	90474768	-	5676	protein_coding	metallo-beta-lactamase domain containing 2 [Source:HGNC Symbol;Acc:HGNC:33711]	-
ENSG00000248713	141.786	486.054	-1.76821	5.11e-09	1.78e-07	C4orf54	4	99636529	99654648	-	10086	protein_coding	chromosome 4 open reading frame 54 [Source:HGNC Symbol;Acc:HGNC:27741]	-
ENSG00000101367	3118.39	4368.88	-0.486805	5.35e-09	1.86e-07	MAPRE1	20	32819893	32850405	+	2623	protein_coding	microtubule associated protein RP/EB family member 1 [Source:HGNC Symbol;Acc:HGNC:6890]	-
ENSG00000272077	9.71457	46.9992	-2.27821	5.39e-09	1.87e-07	AC124045.1	3	44667412	44669364	+	1953	lincRNA	novel transcript	-
ENSG00000077157	320.944	598.588	-0.901194	5.4e-09	1.87e-07	PPP1R12B	1	202348699	202592706	+	21069	protein_coding	protein phosphatase 1 regulatory subunit 12B [Source:HGNC Symbol;Acc:HGNC:7619]	-
ENSG00000147274	2150.35	3605.12	-0.745988	5.4e-09	1.87e-07	RBMX	X	136848004	136880764	-	5882	protein_coding	RNA binding motif protein X-linked [Source:HGNC Symbol;Acc:HGNC:9910]	-
ENSG00000107186	166.796	305.654	-0.870292	5.8e-09	2.01e-07	MPDZ	9	13105704	13279590	-	11273	protein_coding	multiple PDZ domain crumbs cell polarity complex component [Source:HGNC Symbol;Acc:HGNC:7208]	-
ENSG00000164117	190.517	92.7061	1.04501	5.84e-09	2.02e-07	FBXO8	4	174236658	174284264	-	2810	protein_coding	F-box protein 8 [Source:HGNC Symbol;Acc:HGNC:13587]	-
ENSG00000165527	1515.22	910.92	0.735262	5.85e-09	2.02e-07	ARF6	14	49893092	49897054	+	3865	protein_coding	ADP ribosylation factor 6 [Source:HGNC Symbol;Acc:HGNC:659]	-
ENSG00000100167	367.506	737.975	-1.00094	5.95e-09	2.05e-07	2021-09-03	22	41969475	41998221	+	7153	protein_coding	septin 3 [Source:HGNC Symbol;Acc:HGNC:10750]	-
ENSG00000101189	1453.18	937.912	0.630442	5.98e-09	2.06e-07	MRGBP	20	62796453	62801738	+	2781	protein_coding	MRG domain binding protein [Source:HGNC Symbol;Acc:HGNC:15866]	-
ENSG00000135974	638.656	358.5	0.833815	6.03e-09	2.07e-07	C2orf49	2	105337359	105349211	+	4768	protein_coding	chromosome 2 open reading frame 49 [Source:HGNC Symbol;Acc:HGNC:28772]	-
ENSG00000166398	470.7	264.493	0.827974	6.14e-09	2.11e-07	KIAA0355	19	34254537	34355586	+	7459	protein_coding	KIAA0355 [Source:HGNC Symbol;Acc:HGNC:29016]	-
ENSG00000168826	103.62	37.4314	1.45896	6.18e-09	2.12e-07	ZBTB49	4	4290251	4321786	+	2889	protein_coding	zinc finger and BTB domain containing 49 [Source:HGNC Symbol;Acc:HGNC:19883]	ZBTB
ENSG00000113739	8649.64	4329.13	0.998306	6.27e-09	2.14e-07	STC2	5	173314713	173329503	-	6128	protein_coding	stanniocalcin 2 [Source:HGNC Symbol;Acc:HGNC:11374]	-
ENSG00000205312	74.1306	268.859	-1.8445	6.49e-09	2.21e-07	KRT17P4	17	16847635	16852777	-	2964	transcribed_unprocessed_pseudogene	keratin 17 pseudogene 4 [Source:HGNC Symbol;Acc:HGNC:50722]	-
ENSG00000115649	606.33	353.506	0.775605	6.68e-09	2.28e-07	CNPPD1	2	219171897	219178106	-	2760	protein_coding	cyclin Pas1/PHO80 domain containing 1 [Source:HGNC Symbol;Acc:HGNC:25220]	-
ENSG00000167658	32286.3	20547.1	0.65192	6.72e-09	2.29e-07	EEF2	19	3976056	3985469	-	4027	protein_coding	eukaryotic translation elongation factor 2 [Source:HGNC Symbol;Acc:HGNC:3214]	-
ENSG00000089050	138.794	273.525	-0.978744	6.95e-09	2.36e-07	RBBP9	20	18486540	18497243	-	3861	protein_coding	RB binding protein 9, serine hydrolase [Source:HGNC Symbol;Acc:HGNC:9892]	-
ENSG00000114784	704.816	381.493	0.886148	7.09e-09	2.41e-07	EIF1B	3	40309684	40312424	+	1912	protein_coding	eukaryotic translation initiation factor 1B [Source:HGNC Symbol;Acc:HGNC:30792]	-
ENSG00000204842	817.103	469.242	0.800828	7.2e-09	2.43e-07	ATXN2	12	111443485	111599676	-	16504	protein_coding	ataxin 2 [Source:HGNC Symbol;Acc:HGNC:10555]	-
ENSG00000229180	355.648	207.817	0.776402	7.2e-09	2.43e-07	AC006001.3	7	66526088	66592397	-	10101	transcribed_unprocessed_pseudogene	RAB guanine nucleotide exchange factor (GEF) 1 (RABGEF1) pseudogene	-
ENSG00000011422	758.922	163.018	2.22036	7.23e-09	2.44e-07	PLAUR	19	43646095	43670547	-	4457	protein_coding	plasminogen activator, urokinase receptor [Source:HGNC Symbol;Acc:HGNC:9053]	-
ENSG00000157978	317.386	556.532	-0.807478	7.37e-09	2.49e-07	LDLRAP1	1	25543580	25568886	+	5397	protein_coding	low density lipoprotein receptor adaptor protein 1 [Source:HGNC Symbol;Acc:HGNC:18640]	-
ENSG00000106771	870.472	1279.14	-0.555071	7.59e-09	2.56e-07	TMEM245	9	109015152	109119945	-	9484	protein_coding	transmembrane protein 245 [Source:HGNC Symbol;Acc:HGNC:1363]	-
ENSG00000185033	889.19	83.9715	3.40537	7.83e-09	2.63e-07	SEMA4B	15	90160604	90229679	+	7006	protein_coding	semaphorin 4B [Source:HGNC Symbol;Acc:HGNC:10730]	-
ENSG00000116962	827.536	1404.83	-0.763408	8.22e-09	2.76e-07	NID1	1	235975830	236065162	-	5864	protein_coding	nidogen 1 [Source:HGNC Symbol;Acc:HGNC:7821]	-
ENSG00000162975	166.908	327.508	-0.964431	8.38e-09	2.81e-07	KCNF1	2	10911937	10914225	+	2289	protein_coding	potassium voltage-gated channel modifier subfamily F member 1 [Source:HGNC Symbol;Acc:HGNC:6246]	-
ENSG00000125534	2451.18	770.847	1.66831	8.5e-09	2.84e-07	PPDPF	20	63520724	63522206	+	1094	protein_coding	pancreatic progenitor cell differentiation and proliferation factor [Source:HGNC Symbol;Acc:HGNC:16142]	-
ENSG00000213390	264.475	469.994	-0.82455	8.64e-09	2.88e-07	ARHGAP19	10	97222173	97292673	-	6167	protein_coding	Rho GTPase activating protein 19 [Source:HGNC Symbol;Acc:HGNC:23724]	-
ENSG00000228794	213.378	362.793	-0.76661	8.75e-09	2.92e-07	LINC01128	1	825138	859446	+	9470	processed_transcript	long intergenic non-protein coding RNA 1128 [Source:HGNC Symbol;Acc:HGNC:49377]	-
ENSG00000140612	1078.98	727.422	0.569678	8.78e-09	2.92e-07	SEC11A	15	84669538	84716716	-	5748	protein_coding	SEC11 homolog A, signal peptidase complex subunit [Source:HGNC Symbol;Acc:HGNC:17718]	-
ENSG00000237441	543.509	238.061	1.19016	8.97e-09	2.98e-07	RGL2	6	33291654	33299324	-	4541	protein_coding	ral guanine nucleotide dissociation stimulator like 2 [Source:HGNC Symbol;Acc:HGNC:9769]	-
ENSG00000277128	8.95587	49.5573	-2.3976	9.04e-09	3e-07	AL589743.4	14	19124807	19175530	-	7344	lincRNA	novel transcript	-
ENSG00000058056	283.616	604.114	-1.09734	9.07e-09	3e-07	USP13	3	179652755	179789401	+	8440	protein_coding	ubiquitin specific peptidase 13 [Source:HGNC Symbol;Acc:HGNC:12611]	-
ENSG00000177600	7350.35	4314.39	0.768915	9.08e-09	3e-07	RPLP2	11	809647	812880	+	1955	protein_coding	ribosomal protein lateral stalk subunit P2 [Source:HGNC Symbol;Acc:HGNC:10377]	-
ENSG00000196639	246.528	90.2212	1.45548	9.41e-09	3.11e-07	HRH1	3	11137093	11263557	+	5546	protein_coding	histamine receptor H1 [Source:HGNC Symbol;Acc:HGNC:5182]	-
ENSG00000124575	65.9749	3.79221	4.12565	9.59e-09	3.16e-07	HIST1H1D	6	26234268	26234933	-	666	protein_coding	histone cluster 1 H1 family member d [Source:HGNC Symbol;Acc:HGNC:4717]	-
ENSG00000253106	3.93183	29.9614	-2.86931	9.65e-09	3.18e-07	AC090198.1	8	124488510	124491643	+	2355	antisense	novel transcript, antisense to TATDN1	-
ENSG00000162772	912.607	440.305	1.05326	9.75e-09	3.21e-07	ATF3	1	212565334	212620777	+	4040	protein_coding	activating transcription factor 3 [Source:HGNC Symbol;Acc:HGNC:785]	TF_bZIP
ENSG00000140464	680.194	402.535	0.757495	9.8e-09	3.22e-07	PML	15	73994673	74047812	+	12657	protein_coding	promyelocytic leukemia [Source:HGNC Symbol;Acc:HGNC:9113]	-
ENSG00000084676	480.46	919.154	-0.935523	9.81e-09	3.22e-07	NCOA1	2	24491914	24770702	+	8633	protein_coding	nuclear receptor coactivator 1 [Source:HGNC Symbol;Acc:HGNC:7668]	-
ENSG00000231205	212.688	400.792	-0.910101	9.92e-09	3.25e-07	ZNF826P	19	20340269	20424969	-	6008	transcribed_unprocessed_pseudogene	zinc finger protein 826, pseudogene [Source:HGNC Symbol;Acc:HGNC:33875]	-
ENSG00000198920	596.692	305.049	0.970548	1.03e-08	3.35e-07	KIAA0753	17	6578148	6640927	-	6299	protein_coding	KIAA0753 [Source:HGNC Symbol;Acc:HGNC:29110]	-
ENSG00000152270	93.6902	256.111	-1.43539	1.03e-08	3.37e-07	PDE3B	11	14643723	14872044	+	11707	protein_coding	phosphodiesterase 3B [Source:HGNC Symbol;Acc:HGNC:8779]	-
ENSG00000112306	8186.3	4996.52	0.712032	1.03e-08	3.37e-07	RPS12	6	132814441	132817564	+	767	protein_coding	ribosomal protein S12 [Source:HGNC Symbol;Acc:HGNC:10385]	-
ENSG00000160685	809.158	395.85	1.0303	1.05e-08	3.4e-07	ZBTB7B	1	155002630	155018522	+	4303	protein_coding	zinc finger and BTB domain containing 7B [Source:HGNC Symbol;Acc:HGNC:18668]	ZBTB
ENSG00000236453	140.168	33.5047	2.07272	1.06e-08	3.45e-07	AC003092.1	7	94022833	94066661	+	1064	lincRNA	novel transcript	-
ENSG00000105072	151.79	69.0172	1.13398	1.07e-08	3.47e-07	C19orf44	19	16496311	16521352	+	4421	protein_coding	chromosome 19 open reading frame 44 [Source:HGNC Symbol;Acc:HGNC:26141]	-
ENSG00000064666	1709.12	740.396	1.2057	1.13e-08	3.67e-07	CNN2	19	1026581	1039068	+	3645	protein_coding	calponin 2 [Source:HGNC Symbol;Acc:HGNC:2156]	-
ENSG00000213020	66.6034	144.34	-1.12159	1.16e-08	3.76e-07	ZNF611	19	52702813	52735073	-	7148	protein_coding	zinc finger protein 611 [Source:HGNC Symbol;Acc:HGNC:28766]	zf-C2H2
ENSG00000087842	151.885	292.19	-0.950566	1.17e-08	3.78e-07	PIR	X	15384799	15493564	-	2512	protein_coding	pirin [Source:HGNC Symbol;Acc:HGNC:30048]	-
ENSG00000247556	178.102	423.593	-1.24196	1.21e-08	3.91e-07	OIP5-AS1	15	41283990	41309737	+	12673	processed_transcript	OIP5 antisense RNA 1 [Source:HGNC Symbol;Acc:HGNC:43563]	-
ENSG00000135114	182.602	78.8167	1.21944	1.22e-08	3.94e-07	OASL	12	121019111	121039242	-	3517	protein_coding	2'-5'-oligoadenylate synthetase like [Source:HGNC Symbol;Acc:HGNC:8090]	-
ENSG00000188766	557.841	206.952	1.42751	1.22e-08	3.94e-07	SPRED3	19	38388421	38399587	+	5864	protein_coding	sprouty related EVH1 domain containing 3 [Source:HGNC Symbol;Acc:HGNC:31041]	-
ENSG00000164011	198.223	105.321	0.908307	1.23e-08	3.94e-07	ZNF691	1	42846573	42852477	+	2036	protein_coding	zinc finger protein 691 [Source:HGNC Symbol;Acc:HGNC:28028]	zf-C2H2
ENSG00000171940	735.407	372.079	0.985595	1.29e-08	4.12e-07	ZNF217	20	53567065	53609907	-	6181	protein_coding	zinc finger protein 217 [Source:HGNC Symbol;Acc:HGNC:13009]	zf-C2H2
ENSG00000103522	27.3967	79.3701	-1.52163	1.31e-08	4.19e-07	IL21R	16	27402162	27452042	+	5467	protein_coding	interleukin 21 receptor [Source:HGNC Symbol;Acc:HGNC:6006]	-
ENSG00000165424	264.054	543.745	-1.03843	1.32e-08	4.21e-07	ZCCHC24	10	79382325	79445627	-	5051	protein_coding	zinc finger CCHC-type containing 24 [Source:HGNC Symbol;Acc:HGNC:26911]	-
ENSG00000140525	743.549	1317.45	-0.823179	1.33e-08	4.26e-07	FANCI	15	89243949	89317261	+	7766	protein_coding	FA complementation group I [Source:HGNC Symbol;Acc:HGNC:25568]	-
ENSG00000159882	107.591	48.2463	1.15905	1.37e-08	4.36e-07	ZNF230	19	44002948	44013926	+	6298	protein_coding	zinc finger protein 230 [Source:HGNC Symbol;Acc:HGNC:13024]	zf-C2H2
ENSG00000224239	3.49415	31.5417	-3.23553	1.4e-08	4.45e-07	AC090044.1	3	857124	858091	+	497	lincRNA	novel transcript	-
ENSG00000099822	134.095	60.5817	1.14921	1.41e-08	4.48e-07	HCN2	19	589893	617159	+	3408	protein_coding	hyperpolarization activated cyclic nucleotide gated potassium and sodium channel 2 [Source:HGNC Symbol;Acc:HGNC:4846]	-
ENSG00000130158	782.954	404.355	0.955228	1.42e-08	4.52e-07	DOCK6	19	11199295	11262481	-	12435	protein_coding	dedicator of cytokinesis 6 [Source:HGNC Symbol;Acc:HGNC:19189]	-
ENSG00000178202	464.469	805.132	-0.7954	1.44e-08	4.54e-07	KDELC2	11	108472105	108498432	-	4993	protein_coding	KDEL motif containing 2 [Source:HGNC Symbol;Acc:HGNC:28496]	-
ENSG00000125743	2763.76	1627.78	0.764094	1.44e-08	4.54e-07	SNRPD2	19	45687454	45692569	-	1608	protein_coding	small nuclear ribonucleoprotein D2 polypeptide [Source:HGNC Symbol;Acc:HGNC:11159]	-
ENSG00000145808	46.3292	113.872	-1.28316	1.44e-08	4.55e-07	ADAMTS19	5	129460265	129738683	+	5408	protein_coding	ADAM metallopeptidase with thrombospondin type 1 motif 19 [Source:HGNC Symbol;Acc:HGNC:17111]	-
ENSG00000100968	521.455	244.616	1.09241	1.46e-08	4.59e-07	NFATC4	14	24365673	24379604	+	8437	protein_coding	nuclear factor of activated T cells 4 [Source:HGNC Symbol;Acc:HGNC:7778]	RHD
ENSG00000162407	149.448	257.329	-0.785143	1.47e-08	4.62e-07	PLPP3	1	56494747	56645301	-	5286	protein_coding	phospholipid phosphatase 3 [Source:HGNC Symbol;Acc:HGNC:9229]	-
ENSG00000115268	12382.3	6944.29	0.834495	1.47e-08	4.63e-07	RPS15	19	1438358	1440494	+	2137	protein_coding	ribosomal protein S15 [Source:HGNC Symbol;Acc:HGNC:10388]	-
ENSG00000136982	455.18	853.811	-0.905682	1.47e-08	4.63e-07	DSCC1	8	119833976	119856010	-	2603	protein_coding	DNA replication and sister chromatid cohesion 1 [Source:HGNC Symbol;Acc:HGNC:24453]	-
ENSG00000205213	228.617	699.883	-1.6081	1.48e-08	4.64e-07	LGR4	11	27365961	27472775	-	6340	protein_coding	leucine rich repeat containing G protein-coupled receptor 4 [Source:HGNC Symbol;Acc:HGNC:13299]	-
ENSG00000071246	151.734	376.282	-1.30764	1.52e-08	4.75e-07	VASH1	14	76762189	76783015	+	6502	protein_coding	vasohibin 1 [Source:HGNC Symbol;Acc:HGNC:19964]	-
ENSG00000114626	240.616	96.4364	1.3224	1.52e-08	4.75e-07	ABTB1	3	127672935	127680920	+	6149	protein_coding	ankyrin repeat and BTB domain containing 1 [Source:HGNC Symbol;Acc:HGNC:18275]	-
ENSG00000123684	477.726	765.093	-0.676663	1.56e-08	4.88e-07	LPGAT1	1	211743457	211830772	-	8799	protein_coding	lysophosphatidylglycerol acyltransferase 1 [Source:HGNC Symbol;Acc:HGNC:28985]	-
ENSG00000177410	952.474	496.511	0.941208	1.59e-08	4.95e-07	ZFAS1	20	49278178	49295738	+	2243	antisense	ZNFX1 antisense RNA 1 [Source:HGNC Symbol;Acc:HGNC:33101]	-
ENSG00000173812	6677.17	3579.9	0.899557	1.6e-08	4.99e-07	EIF1	17	41688885	41692668	+	3623	protein_coding	eukaryotic translation initiation factor 1 [Source:HGNC Symbol;Acc:HGNC:3249]	-
ENSG00000164236	358.559	208.002	0.78446	1.61e-08	5.01e-07	ANKRD33B	5	10564330	10657816	+	9783	protein_coding	ankyrin repeat domain 33B [Source:HGNC Symbol;Acc:HGNC:35240]	-
ENSG00000109519	1061.36	682.478	0.637219	1.64e-08	5.08e-07	GRPEL1	4	7058906	7068197	-	4177	protein_coding	GrpE like 1, mitochondrial [Source:HGNC Symbol;Acc:HGNC:19696]	-
ENSG00000197816	4.20951	34.7576	-3.13491	1.68e-08	5.21e-07	CCDC180	9	97307304	97378524	+	14155	protein_coding	coiled-coil domain containing 180 [Source:HGNC Symbol;Acc:HGNC:29303]	-
ENSG00000127957	151.499	62.2858	1.27269	1.68e-08	5.21e-07	PMS2P3	7	75502930	75528148	-	1727	transcribed_unprocessed_pseudogene	PMS1 homolog 2, mismatch repair system component pseudogene 3 [Source:HGNC Symbol;Acc:HGNC:9128]	-
ENSG00000170365	197.085	369.467	-0.902533	1.7e-08	5.24e-07	SMAD1	4	145481194	145558079	+	6058	protein_coding	SMAD family member 1 [Source:HGNC Symbol;Acc:HGNC:6767]	MH1
ENSG00000127946	866.622	1421.78	-0.715849	1.71e-08	5.26e-07	HIP1	7	75533300	75738962	-	8953	protein_coding	huntingtin interacting protein 1 [Source:HGNC Symbol;Acc:HGNC:4913]	-
ENSG00000151692	307.656	474.325	-0.621329	1.74e-08	5.35e-07	RNF144A	2	6917392	7068286	+	6473	protein_coding	ring finger protein 144A [Source:HGNC Symbol;Acc:HGNC:20457]	-
ENSG00000228409	206.646	118.106	0.811826	1.79e-08	5.5e-07	CCT6P1	7	65751142	65763354	+	1670	transcribed_unprocessed_pseudogene	chaperonin containing TCP1 subunit 6 pseudogene 1 [Source:HGNC Symbol;Acc:HGNC:33094]	-
ENSG00000083720	353.379	625.017	-0.822674	1.85e-08	5.68e-07	OXCT1	5	41730065	41870519	-	4194	protein_coding	3-oxoacid CoA-transferase 1 [Source:HGNC Symbol;Acc:HGNC:8527]	-
ENSG00000130175	2470.7	1463.37	0.755652	1.87e-08	5.72e-07	PRKCSH	19	11435288	11450968	+	5166	protein_coding	protein kinase C substrate 80K-H [Source:HGNC Symbol;Acc:HGNC:9411]	-
ENSG00000163739	1328.57	2.51376	9.04322	1.87e-08	5.72e-07	CXCL1	4	73869393	73871242	+	1296	protein_coding	C-X-C motif chemokine ligand 1 [Source:HGNC Symbol;Acc:HGNC:4602]	-
ENSG00000135903	151.931	78.6201	0.951639	1.9e-08	5.81e-07	PAX3	2	222199888	222298996	-	7939	protein_coding	paired box 3 [Source:HGNC Symbol;Acc:HGNC:8617]	PAX
ENSG00000260947	17.5498	70.3465	-1.97192	1.9e-08	5.81e-07	AL356489.2	9	33697459	33700986	+	3528	lincRNA	novel transcript	-
ENSG00000156453	326.897	159.441	1.03846	2.01e-08	6.14e-07	PCDH1	5	141853111	141879246	-	5903	protein_coding	protocadherin 1 [Source:HGNC Symbol;Acc:HGNC:8655]	-
ENSG00000267510	32.5415	7.20246	2.16022	2.05e-08	6.25e-07	AC011451.1	19	9291515	9294482	+	405	antisense	novel transcript, antisense to ZNF699	-
ENSG00000266173	22.6534	72.2101	-1.69321	2.16e-08	6.58e-07	STRADA	17	63682336	63741986	-	10860	protein_coding	STE20-related kinase adaptor alpha [Source:HGNC Symbol;Acc:HGNC:30172]	-
ENSG00000069275	2148.73	5035.46	-1.22787	2.19e-08	6.65e-07	NUCKS1	1	205712819	205750276	-	6546	protein_coding	nuclear casein kinase and cyclin dependent kinase substrate 1 [Source:HGNC Symbol;Acc:HGNC:29923]	-
ENSG00000146433	533.794	1010.07	-0.916427	2.22e-08	6.74e-07	TMEM181	6	158536436	158635428	+	5390	protein_coding	transmembrane protein 181 [Source:HGNC Symbol;Acc:HGNC:20958]	-
ENSG00000246859	5.61331	34.7921	-2.54581	2.4e-08	7.28e-07	STARD4-AS1	5	111512226	111739726	+	5647	antisense	STARD4 antisense RNA 1 [Source:HGNC Symbol;Acc:HGNC:44117]	-
ENSG00000099194	4288.91	6641.61	-0.630755	2.44e-08	7.4e-07	SCD	10	100347124	100364834	+	5362	protein_coding	stearoyl-CoA desaturase [Source:HGNC Symbol;Acc:HGNC:10571]	-
ENSG00000105617	293.276	86.3584	1.7589	2.45e-08	7.4e-07	LENG1	19	54155161	54159882	-	1542	protein_coding	leukocyte receptor cluster member 1 [Source:HGNC Symbol;Acc:HGNC:15502]	-
ENSG00000109971	7619.25	19339.6	-1.34404	2.45e-08	7.4e-07	HSPA8	11	123057489	123063230	-	4849	protein_coding	heat shock protein family A (Hsp70) member 8 [Source:HGNC Symbol;Acc:HGNC:5241]	-
ENSG00000125753	1676	821.053	1.02915	2.49e-08	7.49e-07	VASP	19	45506579	45526983	+	3601	protein_coding	vasodilator stimulated phosphoprotein [Source:HGNC Symbol;Acc:HGNC:12652]	-
ENSG00000142945	1706.46	2572.11	-0.592787	2.53e-08	7.62e-07	KIF2C	1	44739818	44767767	+	3646	protein_coding	kinesin family member 2C [Source:HGNC Symbol;Acc:HGNC:6393]	-
ENSG00000142089	880.848	422.66	1.06128	2.55e-08	7.65e-07	IFITM3	11	319669	327537	-	1348	protein_coding	interferon induced transmembrane protein 3 [Source:HGNC Symbol;Acc:HGNC:5414]	-
ENSG00000169918	130.727	289.885	-1.16013	2.58e-08	7.73e-07	OTUD7A	15	31475398	31870789	-	14331	protein_coding	OTU deubiquitinase 7A [Source:HGNC Symbol;Acc:HGNC:20718]	-
ENSG00000173110	96.6498	17.5182	2.46452	2.61e-08	7.83e-07	HSPA6	1	161524540	161526910	+	2371	protein_coding	heat shock protein family A (Hsp70) member 6 [Source:HGNC Symbol;Acc:HGNC:5239]	-
ENSG00000122203	1927.7	1297.16	0.571619	2.69e-08	8.05e-07	KIAA1191	5	176346061	176361968	-	3973	protein_coding	KIAA1191 [Source:HGNC Symbol;Acc:HGNC:29209]	-
ENSG00000224271	77.1777	20.1031	1.95158	2.78e-08	8.31e-07	AL117329.1	22	47631674	47855600	+	2276	lincRNA	uncharacterized LOC284930 [Source:NCBI gene;Acc:284930]	-
ENSG00000233117	35.0438	8.38412	2.06532	2.82e-08	8.42e-07	LINC00702	10	4201141	4243912	-	6785	lincRNA	long intergenic non-protein coding RNA 702 [Source:HGNC Symbol;Acc:HGNC:44676]	-
ENSG00000125089	184.719	65.3254	1.50435	2.91e-08	8.67e-07	SH3TC1	4	8182072	8241803	+	10593	protein_coding	SH3 domain and tetratricopeptide repeats 1 [Source:HGNC Symbol;Acc:HGNC:26009]	-
ENSG00000105443	813.436	468.103	0.795403	2.97e-08	8.84e-07	CYTH2	19	48469032	48482314	+	9509	protein_coding	cytohesin 2 [Source:HGNC Symbol;Acc:HGNC:9502]	-
ENSG00000164808	810.695	1339.77	-0.727032	3.08e-08	9.15e-07	SPIDR	8	47260575	47736306	+	7477	protein_coding	scaffold protein involved in DNA repair [Source:HGNC Symbol;Acc:HGNC:28971]	-
ENSG00000196922	171.391	339.357	-0.977929	3.1e-08	9.2e-07	ZNF252P	8	144973589	145002895	-	9148	transcribed_unprocessed_pseudogene	zinc finger protein 252, pseudogene [Source:HGNC Symbol;Acc:HGNC:13046]	-
ENSG00000135111	281.311	154.035	0.864342	3.14e-08	9.29e-07	TBX3	12	114670254	114684164	-	5950	protein_coding	T-box 3 [Source:HGNC Symbol;Acc:HGNC:11602]	T-box
ENSG00000160055	133.752	63.2369	1.08506	3.14e-08	9.29e-07	TMEM234	1	32214472	32222359	-	3571	protein_coding	transmembrane protein 234 [Source:HGNC Symbol;Acc:HGNC:28837]	-
ENSG00000112852	179.905	365.327	-1.02985	3.2e-08	9.44e-07	PCDHB2	5	141094578	141098703	+	4126	protein_coding	protocadherin beta 2 [Source:HGNC Symbol;Acc:HGNC:8687]	-
ENSG00000188786	437.939	220.984	0.982479	3.21e-08	9.47e-07	MTF1	1	37809567	37859620	-	8024	protein_coding	metal regulatory transcription factor 1 [Source:HGNC Symbol;Acc:HGNC:7428]	zf-C2H2
ENSG00000007080	1906.16	731.657	1.3805	3.22e-08	9.5e-07	CCDC124	19	17933016	17943991	+	1660	protein_coding	coiled-coil domain containing 124 [Source:HGNC Symbol;Acc:HGNC:25171]	-
ENSG00000041988	332.905	129.09	1.36114	3.24e-08	9.53e-07	THAP3	1	6624866	6635586	+	4072	protein_coding	THAP domain containing 3 [Source:HGNC Symbol;Acc:HGNC:20855]	THAP
ENSG00000126787	465.254	1227.98	-1.39722	3.24e-08	9.53e-07	DLGAP5	14	55148112	55191678	-	3667	protein_coding	DLG associated protein 5 [Source:HGNC Symbol;Acc:HGNC:16864]	-
ENSG00000104894	16.3984	59.7981	-1.90368	3.3e-08	9.67e-07	CD37	19	49335171	49343335	+	4161	protein_coding	CD37 molecule [Source:HGNC Symbol;Acc:HGNC:1666]	-
ENSG00000169245	26.773	1.68504	4.00248	3.51e-08	1.03e-06	CXCL10	4	76021117	76023497	-	1176	protein_coding	C-X-C motif chemokine ligand 10 [Source:HGNC Symbol;Acc:HGNC:10637]	-
ENSG00000042753	2443.13	1467.93	0.734298	3.62e-08	1.06e-06	AP2S1	19	46838136	46850992	-	1704	protein_coding	adaptor related protein complex 2 subunit sigma 1 [Source:HGNC Symbol;Acc:HGNC:565]	-
ENSG00000185049	1028.63	458.268	1.16462	3.64e-08	1.06e-06	NELFA	4	1982714	2041903	-	5935	protein_coding	negative elongation factor complex member A [Source:HGNC Symbol;Acc:HGNC:12768]	-
ENSG00000163545	697.579	73.2282	3.25066	3.73e-08	1.09e-06	NUAK2	1	205302059	205321791	-	3441	protein_coding	NUAK family kinase 2 [Source:HGNC Symbol;Acc:HGNC:29558]	-
ENSG00000166924	167.88	49.1046	1.77355	3.81e-08	1.11e-06	NYAP1	7	100483927	100494799	+	3586	protein_coding	neuronal tyrosine phosphorylated phosphoinositide-3-kinase adaptor 1 [Source:HGNC Symbol;Acc:HGNC:22009]	-
ENSG00000125846	184.36	105.093	0.815451	3.94e-08	1.15e-06	ZNF133	20	18288283	18316996	+	5426	protein_coding	zinc finger protein 133 [Source:HGNC Symbol;Acc:HGNC:12917]	zf-C2H2
ENSG00000205266	20.9524	68.2778	-1.67008	3.94e-08	1.15e-06	KRT17P5	17	18415728	18425097	+	3157	transcribed_unprocessed_pseudogene	keratin 17 pseudogene 5 [Source:HGNC Symbol;Acc:HGNC:50723]	-
ENSG00000135720	718.039	1122.23	-0.644953	3.95e-08	1.15e-06	DYNC1LI2	16	66720893	66751798	-	8278	protein_coding	dynein cytoplasmic 1 light intermediate chain 2 [Source:HGNC Symbol;Acc:HGNC:2966]	-
ENSG00000105640	12247.7	6363.33	0.944573	4e-08	1.16e-06	RPL18A	19	17859876	17864153	+	3527	protein_coding	ribosomal protein L18a [Source:HGNC Symbol;Acc:HGNC:10311]	-
ENSG00000037749	200.367	407.4	-1.0285	4.24e-08	1.23e-06	MFAP3	5	154038906	154220478	+	7795	protein_coding	microfibril associated protein 3 [Source:HGNC Symbol;Acc:HGNC:7034]	-
ENSG00000184792	257.671	150.086	0.785096	4.37e-08	1.26e-06	OSBP2	22	30693782	30907824	+	6700	protein_coding	oxysterol binding protein 2 [Source:HGNC Symbol;Acc:HGNC:8504]	-
ENSG00000166033	116.387	223.581	-0.937679	4.43e-08	1.28e-06	HTRA1	10	122458551	122514908	+	2279	protein_coding	HtrA serine peptidase 1 [Source:HGNC Symbol;Acc:HGNC:9476]	-
ENSG00000213398	86.0462	39.059	1.14973	4.46e-08	1.29e-06	LCAT	16	67939750	67944131	-	2625	protein_coding	lecithin-cholesterol acyltransferase [Source:HGNC Symbol;Acc:HGNC:6522]	-
ENSG00000120149	256.093	140.837	0.864863	4.51e-08	1.3e-06	MSX2	5	174724533	174730893	+	2270	protein_coding	msh homeobox 2 [Source:HGNC Symbol;Acc:HGNC:7392]	Homeobox
ENSG00000135046	2778.08	1376.19	1.01405	4.6e-08	1.32e-06	ANXA1	9	73151757	73170393	+	4561	protein_coding	annexin A1 [Source:HGNC Symbol;Acc:HGNC:533]	-
ENSG00000187699	109.348	267.393	-1.29653	4.61e-08	1.32e-06	C2orf88	2	189879609	190203484	+	5997	protein_coding	chromosome 2 open reading frame 88 [Source:HGNC Symbol;Acc:HGNC:28191]	-
ENSG00000280435	14.3532	56.3994	-2.00811	4.63e-08	1.33e-06	AC006058.4	3	44115818	44117487	-	1670	TEC	TEC	-
ENSG00000108021	612.767	1267.72	-1.04679	4.76e-08	1.36e-06	FAM208B	10	5684838	5763740	+	10960	protein_coding	family with sequence similarity 208 member B [Source:HGNC Symbol;Acc:HGNC:23484]	-
ENSG00000115318	2214.64	1210.3	0.872379	4.78e-08	1.37e-06	LOXL3	2	74532414	74555690	-	4363	protein_coding	lysyl oxidase like 3 [Source:HGNC Symbol;Acc:HGNC:13869]	-
ENSG00000233927	2210.98	1195.63	0.88754	4.8e-08	1.37e-06	RPS28	19	8321158	8323340	+	2119	protein_coding	ribosomal protein S28 [Source:HGNC Symbol;Acc:HGNC:10418]	-
ENSG00000236956	61.9001	18.0295	1.7643	4.91e-08	1.4e-06	NF1P8	2	131189834	131198007	-	1596	unprocessed_pseudogene	neurofibromin 1 pseudogene 8 [Source:HGNC Symbol;Acc:HGNC:7767]	-
ENSG00000139625	344.996	214.3	0.689662	5.04e-08	1.44e-06	MAP3K12	12	53479669	53500063	-	7971	protein_coding	mitogen-activated protein kinase kinase kinase 12 [Source:HGNC Symbol;Acc:HGNC:6851]	-
ENSG00000105855	205.422	94.6035	1.12254	5.06e-08	1.44e-06	ITGB8	7	20330702	20415754	+	15156	protein_coding	integrin subunit beta 8 [Source:HGNC Symbol;Acc:HGNC:6163]	-
ENSG00000164733	2128.99	1141.24	0.900109	5.32e-08	1.51e-06	CTSB	8	11842524	11869448	-	7428	protein_coding	cathepsin B [Source:HGNC Symbol;Acc:HGNC:2527]	-
ENSG00000140262	936.015	1994.88	-1.09005	5.33e-08	1.51e-06	TCF12	15	56918623	57299281	+	9446	protein_coding	transcription factor 12 [Source:HGNC Symbol;Acc:HGNC:11623]	bHLH
ENSG00000234444	283.712	515.358	-0.857425	5.49e-08	1.55e-06	ZNF736	7	64307459	64354860	+	9409	protein_coding	zinc finger protein 736 [Source:HGNC Symbol;Acc:HGNC:32467]	zf-C2H2
ENSG00000142396	54.397	125.526	-1.22367	5.54e-08	1.57e-06	ERVK3-1	19	58305319	58315663	+	5023	protein_coding	endogenous retrovirus group K3 member 1 [Source:HGNC Symbol;Acc:HGNC:30466]	-
ENSG00000231731	6.1559	34.4565	-2.45284	5.67e-08	1.6e-06	AC010976.1	2	127455394	127514623	+	5510	antisense	novel transcript, antisense to IWS1	-
ENSG00000111530	1047.47	2138.69	-1.02803	5.74e-08	1.62e-06	CAND1	12	67269281	67319951	+	13655	protein_coding	cullin associated and neddylation dissociated 1 [Source:HGNC Symbol;Acc:HGNC:30688]	-
ENSG00000058804	1172.41	2066.1	-0.81588	5.75e-08	1.62e-06	NDC1	1	53765460	53838860	-	5135	protein_coding	NDC1 transmembrane nucleoporin [Source:HGNC Symbol;Acc:HGNC:25525]	-
ENSG00000026652	313.979	567.619	-0.849012	5.8e-08	1.63e-06	AGPAT4	6	161129979	161274061	-	8769	protein_coding	1-acylglycerol-3-phosphate O-acyltransferase 4 [Source:HGNC Symbol;Acc:HGNC:20885]	-
ENSG00000136731	1153.19	1909.46	-0.729524	5.82e-08	1.64e-06	UGGT1	2	128091200	128195677	+	11349	protein_coding	UDP-glucose glycoprotein glucosyltransferase 1 [Source:HGNC Symbol;Acc:HGNC:15663]	-
ENSG00000161653	66.8386	23.049	1.54162	5.89e-08	1.65e-06	NAGS	17	44004546	44009063	+	2822	protein_coding	N-acetylglutamate synthase [Source:HGNC Symbol;Acc:HGNC:17996]	-
ENSG00000131981	807.778	417.248	0.954363	5.95e-08	1.67e-06	LGALS3	14	55124110	55145413	+	2397	protein_coding	galectin 3 [Source:HGNC Symbol;Acc:HGNC:6563]	-
ENSG00000251615	11.4897	48.0755	-2.0118	5.98e-08	1.68e-06	AC104825.1	4	8355090	8358338	-	3249	lincRNA	novel transcript	-
ENSG00000245970	11.0872	43.9316	-2.01304	6.01e-08	1.68e-06	AP003352.1	8	98041726	98044121	+	1989	antisense	novel transcript	-
ENSG00000138463	188.389	105.136	0.836721	6.25e-08	1.75e-06	DIRC2	3	122794795	122881139	+	3596	protein_coding	disrupted in renal carcinoma 2 [Source:HGNC Symbol;Acc:HGNC:16628]	-
ENSG00000135097	627.075	297.192	1.07451	6.31e-08	1.76e-06	MSI1	12	120341330	120369180	-	3090	protein_coding	musashi RNA binding protein 1 [Source:HGNC Symbol;Acc:HGNC:7330]	-
ENSG00000126456	753.479	404.474	0.89539	6.33e-08	1.76e-06	IRF3	19	49659569	49665875	-	3794	protein_coding	interferon regulatory factor 3 [Source:HGNC Symbol;Acc:HGNC:6118]	IRF
ENSG00000168477	65.2836	22.7399	1.52003	6.38e-08	1.78e-06	TNXB	6	32041153	32115334	-	15909	protein_coding	tenascin XB [Source:HGNC Symbol;Acc:HGNC:11976]	-
ENSG00000179743	18.0107	58.2779	-1.69841	6.62e-08	1.84e-06	FLJ37453	1	15834474	15848147	-	2473	antisense	uncharacterized LOC729614 [Source:NCBI gene;Acc:729614]	-
ENSG00000100201	2586.78	3544.12	-0.454555	6.63e-08	1.84e-06	DDX17	22	38483440	38507660	-	9995	protein_coding	DEAD-box helicase 17 [Source:HGNC Symbol;Acc:HGNC:2740]	-
ENSG00000257151	30.8528	208.866	-2.7342	6.84e-08	1.89e-06	PWAR6	15	25031873	25036490	+	4618	lincRNA	Prader Willi/Angelman region RNA 6 [Source:HGNC Symbol;Acc:HGNC:49129]	-
ENSG00000148143	559.971	320.813	0.801708	6.85e-08	1.89e-06	ZNF462	9	106863097	107013634	+	12259	protein_coding	zinc finger protein 462 [Source:HGNC Symbol;Acc:HGNC:21684]	-
ENSG00000119508	142.618	29.5922	2.27515	6.85e-08	1.89e-06	NR4A3	9	99821855	99866891	+	6314	protein_coding	nuclear receptor subfamily 4 group A member 3 [Source:HGNC Symbol;Acc:HGNC:7982]	NGFIB-like
ENSG00000132383	638.175	981.094	-0.621579	6.91e-08	1.91e-06	RPA1	17	1829702	1900082	+	5492	protein_coding	replication protein A1 [Source:HGNC Symbol;Acc:HGNC:10289]	-
ENSG00000188176	159.35	345.152	-1.10774	6.97e-08	1.92e-06	SMTNL2	17	4583999	4608319	+	2470	protein_coding	smoothelin like 2 [Source:HGNC Symbol;Acc:HGNC:24764]	-
ENSG00000133606	573.062	305.161	0.910967	7.09e-08	1.95e-06	MKRN1	7	140453040	140479569	-	5869	protein_coding	makorin ring finger protein 1 [Source:HGNC Symbol;Acc:HGNC:7112]	-
ENSG00000107798	324.647	637.05	-0.967739	7.12e-08	1.96e-06	LIPA	10	89213569	89414557	-	4910	protein_coding	lipase A, lysosomal acid type [Source:HGNC Symbol;Acc:HGNC:6617]	-
ENSG00000057294	72.3987	161.079	-1.14217	7.17e-08	1.97e-06	PKP2	12	32790745	32896840	-	7043	protein_coding	plakophilin 2 [Source:HGNC Symbol;Acc:HGNC:9024]	-
ENSG00000103496	494.026	274.281	0.846774	7.25e-08	1.99e-06	STX4	16	31032889	31042975	+	4078	protein_coding	syntaxin 4 [Source:HGNC Symbol;Acc:HGNC:11439]	-
ENSG00000147100	114.821	254.364	-1.14917	7.5e-08	2.06e-06	SLC16A2	X	74421461	74533917	+	4324	protein_coding	solute carrier family 16 member 2 [Source:HGNC Symbol;Acc:HGNC:10923]	-
ENSG00000183580	141.518	303.993	-1.09916	7.67e-08	2.1e-06	FBXL7	5	15500196	15939795	+	4854	protein_coding	F-box and leucine rich repeat protein 7 [Source:HGNC Symbol;Acc:HGNC:13604]	-
ENSG00000105854	447.692	783.691	-0.806737	7.69e-08	2.1e-06	PON2	7	95404863	95435329	-	3843	protein_coding	paraoxonase 2 [Source:HGNC Symbol;Acc:HGNC:9205]	-
ENSG00000137218	138.893	62.9738	1.12995	7.7e-08	2.1e-06	FRS3	6	41770176	41786542	-	2858	protein_coding	fibroblast growth factor receptor substrate 3 [Source:HGNC Symbol;Acc:HGNC:16970]	-
ENSG00000163520	331.627	594.574	-0.846356	7.72e-08	2.11e-06	FBLN2	3	13549131	13638422	+	4812	protein_coding	fibulin 2 [Source:HGNC Symbol;Acc:HGNC:3601]	-
ENSG00000225921	1264.94	822.499	0.619652	8.13e-08	2.21e-06	NOL7	6	13615327	13632739	+	1865	protein_coding	nucleolar protein 7 [Source:HGNC Symbol;Acc:HGNC:21040]	-
ENSG00000144713	17035.4	9364.4	0.863395	8.18e-08	2.23e-06	RPL32	3	12834485	12841588	-	3720	protein_coding	ribosomal protein L32 [Source:HGNC Symbol;Acc:HGNC:10336]	-
ENSG00000130222	304.881	116.128	1.38828	8.23e-08	2.23e-06	GADD45G	9	89605013	89606555	+	1322	protein_coding	growth arrest and DNA damage inducible gamma [Source:HGNC Symbol;Acc:HGNC:4097]	-
ENSG00000117069	102.179	234.709	-1.21405	8.23e-08	2.23e-06	ST6GALNAC5	1	76867441	77065711	+	4263	protein_coding	ST6 N-acetylgalactosaminide alpha-2,6-sialyltransferase 5 [Source:HGNC Symbol;Acc:HGNC:19342]	-
ENSG00000167325	1332.18	2498.93	-0.908074	8.48e-08	2.3e-06	RRM1	11	4094707	4138876	+	4177	protein_coding	ribonucleotide reductase catalytic subunit M1 [Source:HGNC Symbol;Acc:HGNC:10451]	-
ENSG00000205060	92.8229	217.639	-1.239	8.68e-08	2.35e-06	SLC35B4	7	134289332	134317051	-	7109	protein_coding	solute carrier family 35 member B4 [Source:HGNC Symbol;Acc:HGNC:20584]	-
ENSG00000172731	102.565	189.287	-0.880337	8.74e-08	2.36e-06	LRRC20	10	70298970	70382650	-	3625	protein_coding	leucine rich repeat containing 20 [Source:HGNC Symbol;Acc:HGNC:23421]	-
ENSG00000127666	260.927	97.5707	1.41323	9.19e-08	2.48e-06	TICAM1	19	4815932	4831704	-	2676	protein_coding	toll like receptor adaptor molecule 1 [Source:HGNC Symbol;Acc:HGNC:18348]	-
ENSG00000159885	93.4075	42.1429	1.15437	9.2e-08	2.48e-06	ZNF222	19	44025342	44033112	+	2003	protein_coding	zinc finger protein 222 [Source:HGNC Symbol;Acc:HGNC:13015]	zf-C2H2
ENSG00000134070	223.983	76.2606	1.54786	9.23e-08	2.49e-06	IRAK2	3	10164865	10243743	+	3483	protein_coding	interleukin 1 receptor associated kinase 2 [Source:HGNC Symbol;Acc:HGNC:6113]	-
ENSG00000130479	1172.4	422.256	1.47195	9.41e-08	2.53e-06	MAP1S	19	17719242	17734516	+	5040	protein_coding	microtubule associated protein 1S [Source:HGNC Symbol;Acc:HGNC:15715]	-
ENSG00000155008	145.675	270.468	-0.894044	9.42e-08	2.53e-06	APOOL	X	85003826	85093316	+	6548	protein_coding	apolipoprotein O like [Source:HGNC Symbol;Acc:HGNC:24009]	-
ENSG00000134986	149.901	389.859	-1.36966	9.65e-08	2.59e-06	NREP	5	111662621	111997464	-	9337	protein_coding	neuronal regeneration related protein [Source:HGNC Symbol;Acc:HGNC:16834]	-
ENSG00000105372	13984	8340.13	0.745475	9.76e-08	2.61e-06	RPS19	19	41859918	41872926	+	3799	protein_coding	ribosomal protein S19 [Source:HGNC Symbol;Acc:HGNC:10402]	-
ENSG00000082397	1221.81	2021.37	-0.724814	9.84e-08	2.63e-06	EPB41L3	18	5392381	5630700	-	12203	protein_coding	erythrocyte membrane protein band 4.1 like 3 [Source:HGNC Symbol;Acc:HGNC:3380]	-
ENSG00000127527	600.813	347.044	0.788598	9.89e-08	2.64e-06	EPS15L1	19	16355239	16472085	-	8431	protein_coding	epidermal growth factor receptor pathway substrate 15 like 1 [Source:HGNC Symbol;Acc:HGNC:24634]	-
ENSG00000204267	212.599	363.204	-0.773946	1.02e-07	2.71e-06	TAP2	6	32821833	32838780	-	6390	protein_coding	transporter 2, ATP binding cassette subfamily B member [Source:HGNC Symbol;Acc:HGNC:44]	-
ENSG00000268055	0.239773	20.9535	-5.76518	1.02e-07	2.71e-06	AC067969.1	19	38535517	38537128	-	552	antisense	novel transcript, antisense to RYR1	-
ENSG00000076003	1370.2	2741.99	-1.00218	1.02e-07	2.72e-06	MCM6	2	135839626	135876426	-	4118	protein_coding	minichromosome maintenance complex component 6 [Source:HGNC Symbol;Acc:HGNC:6949]	-
ENSG00000172466	901.736	1638.87	-0.859924	1.02e-07	2.72e-06	ZNF24	18	35332212	35345482	-	8257	protein_coding	zinc finger protein 24 [Source:HGNC Symbol;Acc:HGNC:13032]	zf-C2H2
ENSG00000186577	150.526	52.5924	1.52141	1.02e-07	2.72e-06	SMIM29	6	34246380	34249470	-	2229	protein_coding	small integral membrane protein 29 [Source:HGNC Symbol;Acc:HGNC:1340]	-
ENSG00000255455	14.5911	64.3817	-2.09761	1.06e-07	2.81e-06	AP003486.1	11	130866254	130870247	-	3994	lincRNA	uncharacterized LOC103611081 [Source:NCBI gene;Acc:103611081]	-
ENSG00000123505	748.216	1342.17	-0.842999	1.08e-07	2.85e-06	AMD1	6	110874770	110895713	+	7027	protein_coding	adenosylmethionine decarboxylase 1 [Source:HGNC Symbol;Acc:HGNC:457]	-
ENSG00000259848	64.9118	24.5433	1.39776	1.11e-07	2.94e-06	AC097374.1	2	94867486	94947341	-	7136	transcribed_unprocessed_pseudogene	uncharacterized LOC442028 [Source:NCBI gene;Acc:442028]	-
ENSG00000109436	360.434	216.927	0.733192	1.12e-07	2.97e-06	TBC1D9	4	140620765	140756120	-	5603	protein_coding	TBC1 domain family member 9 [Source:HGNC Symbol;Acc:HGNC:21710]	-
ENSG00000149743	379.39	213.945	0.829335	1.13e-07	2.97e-06	TRPT1	11	64223799	64226254	-	2210	protein_coding	tRNA phosphotransferase 1 [Source:HGNC Symbol;Acc:HGNC:20316]	-
ENSG00000060138	4759.4	3202.74	0.571434	1.13e-07	2.97e-06	YBX3	12	10699089	10723312	-	8610	protein_coding	Y-box binding protein 3 [Source:HGNC Symbol;Acc:HGNC:2428]	CSD
ENSG00000065534	193.127	320.172	-0.729537	1.14e-07	2.99e-06	MYLK	3	123610049	123884331	-	22167	protein_coding	myosin light chain kinase [Source:HGNC Symbol;Acc:HGNC:7590]	-
ENSG00000124207	2267.34	5114.13	-1.17294	1.14e-07	3.01e-06	CSE1L	20	49046246	49096960	+	3800	protein_coding	chromosome segregation 1 like [Source:HGNC Symbol;Acc:HGNC:2431]	-
ENSG00000005884	803.822	224.061	1.84408	1.15e-07	3.01e-06	ITGA3	17	50055968	50090481	+	9802	protein_coding	integrin subunit alpha 3 [Source:HGNC Symbol;Acc:HGNC:6139]	-
ENSG00000148737	271.177	163.495	0.727422	1.15e-07	3.01e-06	TCF7L2	10	112950250	113167678	+	6736	protein_coding	transcription factor 7 like 2 [Source:HGNC Symbol;Acc:HGNC:11641]	HMG
ENSG00000155368	1369.92	1916.93	-0.483899	1.17e-07	3.05e-06	DBI	2	119366921	119372560	+	2509	protein_coding	diazepam binding inhibitor, acyl-CoA binding protein [Source:HGNC Symbol;Acc:HGNC:2690]	-
ENSG00000197757	210.373	107.497	0.960451	1.17e-07	3.07e-06	HOXC6	12	53990624	54030823	+	3540	protein_coding	homeobox C6 [Source:HGNC Symbol;Acc:HGNC:5128]	Homeobox
ENSG00000104946	291.228	155.279	0.908321	1.19e-07	3.1e-06	TBC1D17	19	49877425	49888749	+	4745	protein_coding	TBC1 domain family member 17 [Source:HGNC Symbol;Acc:HGNC:25699]	-
ENSG00000176428	250.812	69.589	1.85146	1.2e-07	3.12e-06	VPS37D	7	73667825	73672112	+	1626	protein_coding	VPS37D, ESCRT-I subunit [Source:HGNC Symbol;Acc:HGNC:18287]	-
ENSG00000109189	261.738	501.639	-0.933156	1.2e-07	3.13e-06	USP46	4	52590972	52659335	-	8917	protein_coding	ubiquitin specific peptidase 46 [Source:HGNC Symbol;Acc:HGNC:20075]	-
ENSG00000197406	54.2513	115.32	-1.08291	1.21e-07	3.15e-06	DIO3	14	101561351	101563452	+	2102	protein_coding	iodothyronine deiodinase 3 [Source:HGNC Symbol;Acc:HGNC:2885]	-
ENSG00000054967	348.104	184.981	0.912551	1.21e-07	3.15e-06	RELT	11	73376264	73397474	+	6322	protein_coding	RELT, TNF receptor [Source:HGNC Symbol;Acc:HGNC:13764]	-
ENSG00000279278	12.6589	44.2768	-1.80543	1.22e-07	3.17e-06	AC245060.6	22	22264601	22273020	+	8420	lincRNA	novel transcript	-
ENSG00000105185	559.185	342.187	0.707039	1.22e-07	3.17e-06	PDCD5	19	32581068	32587452	+	2253	protein_coding	programmed cell death 5 [Source:HGNC Symbol;Acc:HGNC:8764]	-
ENSG00000139722	1099.54	540.873	1.02172	1.23e-07	3.18e-06	VPS37B	12	122865328	122896444	-	5953	protein_coding	VPS37B, ESCRT-I subunit [Source:HGNC Symbol;Acc:HGNC:25754]	-
ENSG00000124191	641.93	210.418	1.61114	1.24e-07	3.2e-06	TOX2	20	43914864	44069616	+	3223	protein_coding	TOX high mobility group box family member 2 [Source:HGNC Symbol;Acc:HGNC:16095]	HMG
ENSG00000138785	545.997	298.319	0.873506	1.26e-07	3.26e-06	INTS12	4	105682627	105895986	-	3897	protein_coding	integrator complex subunit 12 [Source:HGNC Symbol;Acc:HGNC:25067]	-
ENSG00000171723	248.939	399.025	-0.681912	1.28e-07	3.29e-06	GPHN	14	66507407	67181803	+	6007	protein_coding	gephyrin [Source:HGNC Symbol;Acc:HGNC:15465]	-
ENSG00000162076	434.79	239.751	0.858397	1.28e-07	3.31e-06	FLYWCH2	16	2883186	2899382	+	1365	protein_coding	FLYWCH family member 2 [Source:HGNC Symbol;Acc:HGNC:25178]	-
ENSG00000107249	164.001	66.1077	1.30297	1.29e-07	3.32e-06	GLIS3	9	3824127	4348392	-	11826	protein_coding	GLIS family zinc finger 3 [Source:HGNC Symbol;Acc:HGNC:28510]	zf-C2H2
ENSG00000160813	225.347	106.107	1.08376	1.3e-07	3.34e-06	PPP1R35	7	100435282	100436565	-	1187	protein_coding	protein phosphatase 1 regulatory subunit 35 [Source:HGNC Symbol;Acc:HGNC:28320]	-
ENSG00000185596	335.728	157.224	1.08966	1.31e-07	3.35e-06	WASH3P	15	101961603	101976543	+	2351	transcribed_unprocessed_pseudogene	WAS protein family homolog 3, pseudogene [Source:HGNC Symbol;Acc:HGNC:24362]	-
ENSG00000108654	4951.95	7676.5	-0.632908	1.32e-07	3.38e-06	DDX5	17	64499616	64508199	-	7388	protein_coding	DEAD-box helicase 5 [Source:HGNC Symbol;Acc:HGNC:2746]	-
ENSG00000105983	350.915	623.739	-0.825253	1.33e-07	3.41e-06	LMBR1	7	156668946	156893230	-	11819	protein_coding	limb development membrane protein 1 [Source:HGNC Symbol;Acc:HGNC:13243]	-
ENSG00000151835	424.91	1815.55	-2.09263	1.34e-07	3.42e-06	SACS	13	23328826	23433740	-	15918	protein_coding	sacsin molecular chaperone [Source:HGNC Symbol;Acc:HGNC:10519]	-
ENSG00000167981	88.8263	39.6668	1.15856	1.34e-07	3.44e-06	ZNF597	16	3432422	3443553	-	5524	protein_coding	zinc finger protein 597 [Source:HGNC Symbol;Acc:HGNC:26573]	zf-C2H2
ENSG00000163661	31.5371	0.182888	7.30825	1.35e-07	3.44e-06	PTX3	3	157436789	157443628	+	1940	protein_coding	pentraxin 3 [Source:HGNC Symbol;Acc:HGNC:9692]	-
ENSG00000024422	798.951	458.746	0.798263	1.35e-07	3.44e-06	EHD2	19	47713343	47743134	+	3923	protein_coding	EH domain containing 2 [Source:HGNC Symbol;Acc:HGNC:3243]	-
ENSG00000000457	95.7763	170.578	-0.837637	1.37e-07	3.5e-06	SCYL3	1	169849631	169894267	-	6883	protein_coding	SCY1 like pseudokinase 3 [Source:HGNC Symbol;Acc:HGNC:19285]	-
ENSG00000213442	1139.46	502.267	1.18066	1.4e-07	3.56e-06	RPL18AP3	12	104265309	104265836	+	528	processed_pseudogene	ribosomal protein L18a pseudogene 3 [Source:HGNC Symbol;Acc:HGNC:31387]	-
ENSG00000197976	557.734	279.011	0.996222	1.45e-07	3.68e-06	AKAP17A	X	1591593	1602514	+	4075	protein_coding	A-kinase anchoring protein 17A [Source:HGNC Symbol;Acc:HGNC:18783]	-
ENSG00000175768	17.8802	68.7047	-1.90665	1.46e-07	3.7e-06	TOMM5	9	37582646	37592642	-	3644	protein_coding	translocase of outer mitochondrial membrane 5 [Source:HGNC Symbol;Acc:HGNC:31369]	-
ENSG00000175931	1084.13	706.236	0.617064	1.52e-07	3.85e-06	UBE2O	17	76389451	76453206	-	6472	protein_coding	ubiquitin conjugating enzyme E2 O [Source:HGNC Symbol;Acc:HGNC:29554]	-
ENSG00000196611	18.4858	0.198787	6.5443	1.52e-07	3.85e-06	MMP1	11	102789920	102798160	-	1970	protein_coding	matrix metallopeptidase 1 [Source:HGNC Symbol;Acc:HGNC:7155]	-
ENSG00000133687	597.62	1150.05	-0.947635	1.57e-07	3.96e-06	TMTC1	12	29500840	29784759	-	14636	protein_coding	transmembrane and tetratricopeptide repeat containing 1 [Source:HGNC Symbol;Acc:HGNC:24099]	-
ENSG00000178567	160.994	382.851	-1.24085	1.57e-07	3.97e-06	EPM2AIP1	3	36985043	36993168	-	8126	protein_coding	EPM2A interacting protein 1 [Source:HGNC Symbol;Acc:HGNC:19735]	-
ENSG00000183762	327.722	621.521	-0.924604	1.58e-07	3.98e-06	KREMEN1	22	29073078	29168333	+	7977	protein_coding	kringle containing transmembrane protein 1 [Source:HGNC Symbol;Acc:HGNC:17550]	-
ENSG00000022976	212.118	115.329	0.873211	1.59e-07	4.01e-06	ZNF839	14	102317377	102342702	+	5590	protein_coding	zinc finger protein 839 [Source:HGNC Symbol;Acc:HGNC:20345]	-
ENSG00000197714	135.161	44.7189	1.58696	1.59e-07	4.01e-06	ZNF460	19	57280051	57293569	+	3505	protein_coding	zinc finger protein 460 [Source:HGNC Symbol;Acc:HGNC:21628]	zf-C2H2
ENSG00000105717	152.081	71.5909	1.09155	1.61e-07	4.06e-06	PBX4	19	19561707	19618916	-	2554	protein_coding	PBX homeobox 4 [Source:HGNC Symbol;Acc:HGNC:13403]	Homeobox
ENSG00000184557	167.755	56.7308	1.56761	1.63e-07	4.08e-06	SOCS3	17	78356778	78360077	-	2734	protein_coding	suppressor of cytokine signaling 3 [Source:HGNC Symbol;Acc:HGNC:19391]	-
ENSG00000274267	75.7589	5.62592	3.74985	1.63e-07	4.1e-06	HIST1H3B	6	26031650	26032060	-	411	protein_coding	histone cluster 1 H3 family member b [Source:HGNC Symbol;Acc:HGNC:4776]	-
ENSG00000076770	75.3759	236.999	-1.63659	1.65e-07	4.13e-06	MBNL3	X	132369317	132489968	-	12199	protein_coding	muscleblind like splicing regulator 3 [Source:HGNC Symbol;Acc:HGNC:20564]	-
ENSG00000131773	343.173	206.029	0.735485	1.69e-07	4.23e-06	KHDRBS3	8	135457457	135656722	+	8645	protein_coding	KH RNA binding domain containing, signal transduction associated 3 [Source:HGNC Symbol;Acc:HGNC:18117]	-
ENSG00000085433	473.895	207.867	1.19238	1.7e-07	4.25e-06	WDR47	1	108970214	109042113	-	4423	protein_coding	WD repeat domain 47 [Source:HGNC Symbol;Acc:HGNC:29141]	-
ENSG00000163009	18.8778	58.5046	-1.67384	1.72e-07	4.29e-06	C2orf48	2	10141382	10211725	+	2502	lincRNA	chromosome 2 open reading frame 48 [Source:HGNC Symbol;Acc:HGNC:26322]	-
ENSG00000279347	2.05553	23.0939	-3.40263	1.77e-07	4.41e-06	AC021945.1	8	119838736	119840385	-	1650	TEC	TEC	-
ENSG00000081913	274.238	168.317	0.70513	1.8e-07	4.5e-06	PHLPP1	18	62715450	62980433	+	9142	protein_coding	PH domain and leucine rich repeat protein phosphatase 1 [Source:HGNC Symbol;Acc:HGNC:20610]	-
ENSG00000278129	121.072	265.174	-1.13638	1.81e-07	4.5e-06	ZNF8	19	58278951	58302805	+	9128	protein_coding	zinc finger protein 8 [Source:HGNC Symbol;Acc:HGNC:13154]	-
ENSG00000277149	95.9329	40.9857	1.22512	1.85e-07	4.61e-06	TYW1B	7	72558744	72828198	-	3258	protein_coding	tRNA-yW synthesizing protein 1 homolog B [Source:HGNC Symbol;Acc:HGNC:33908]	-
ENSG00000164076	278.719	448.96	-0.688958	1.86e-07	4.62e-06	CAMKV	3	49857988	49870222	-	3900	protein_coding	CaM kinase like vesicle associated [Source:HGNC Symbol;Acc:HGNC:28788]	-
ENSG00000138653	21.2293	75.28	-1.80719	1.88e-07	4.67e-06	NDST4	4	114827763	115113876	-	3719	protein_coding	N-deacetylase and N-sulfotransferase 4 [Source:HGNC Symbol;Acc:HGNC:20779]	-
ENSG00000168916	277.696	142.716	0.960767	1.98e-07	4.9e-06	ZNF608	5	124636913	124748807	-	6922	protein_coding	zinc finger protein 608 [Source:HGNC Symbol;Acc:HGNC:29238]	-
ENSG00000099992	233.825	76.7272	1.60423	2.04e-07	5.04e-06	TBC1D10A	22	30291990	30327046	-	7047	protein_coding	TBC1 domain family member 10A [Source:HGNC Symbol;Acc:HGNC:23609]	-
ENSG00000166925	809.87	367.252	1.13872	2.07e-07	5.11e-06	TSC22D4	7	100463359	100479279	-	3715	protein_coding	TSC22 domain family member 4 [Source:HGNC Symbol;Acc:HGNC:21696]	TSC22
ENSG00000163623	79.6252	24.7867	1.67363	2.08e-07	5.14e-06	NKX6-1	4	84491987	84498450	-	3086	protein_coding	NK6 homeobox 1 [Source:HGNC Symbol;Acc:HGNC:7839]	Homeobox
ENSG00000139410	134.764	70.2885	0.933657	2.09e-07	5.16e-06	SDSL	12	113422237	113438276	+	2216	protein_coding	serine dehydratase like [Source:HGNC Symbol;Acc:HGNC:30404]	-
ENSG00000234797	340.459	202.751	0.745043	2.11e-07	5.2e-06	RPS3AP6	15	59768352	59769146	+	795	processed_pseudogene	ribosomal protein S3A pseudogene 6 [Source:HGNC Symbol;Acc:HGNC:18630]	-
ENSG00000271254	41.6063	110.617	-1.40995	2.14e-07	5.28e-06	AC240274.1	KI270711.1	4612	29626	-	4520	protein_coding	neuroblastoma breakpoint family member 1 [Source:NCBI gene;Acc:102724250]	-
ENSG00000008517	241.579	46.0959	2.38588	2.19e-07	5.38e-06	IL32	16	3065297	3082192	+	3209	protein_coding	interleukin 32 [Source:HGNC Symbol;Acc:HGNC:16830]	-
ENSG00000186625	416.763	253.893	0.718871	2.2e-07	5.39e-06	KATNA1	6	149594873	149648972	-	2308	protein_coding	katanin catalytic subunit A1 [Source:HGNC Symbol;Acc:HGNC:6216]	-
ENSG00000163359	20.6324	3.60002	2.48893	2.2e-07	5.39e-06	COL6A3	2	237324003	237414375	-	19633	protein_coding	collagen type VI alpha 3 chain [Source:HGNC Symbol;Acc:HGNC:2213]	-
ENSG00000136830	2795.72	1343.35	1.05703	2.23e-07	5.47e-06	FAM129B	9	127505339	127578989	-	4629	protein_coding	family with sequence similarity 129 member B [Source:HGNC Symbol;Acc:HGNC:25282]	-
ENSG00000014164	982.057	327.456	1.58286	2.31e-07	5.65e-06	ZC3H3	8	143437655	143541453	-	3731	protein_coding	zinc finger CCCH-type containing 3 [Source:HGNC Symbol;Acc:HGNC:28972]	-
ENSG00000139926	542.138	306.077	0.822939	2.32e-07	5.66e-06	FRMD6	14	51489100	51730727	+	9416	protein_coding	FERM domain containing 6 [Source:HGNC Symbol;Acc:HGNC:19839]	-
ENSG00000168140	95.7372	47.6454	1.00032	2.32e-07	5.67e-06	VASN	16	4371848	4383528	+	2806	protein_coding	vasorin [Source:HGNC Symbol;Acc:HGNC:18517]	-
ENSG00000185761	161.97	76.6354	1.08226	2.33e-07	5.69e-06	ADAMTSL5	19	1505018	1513604	-	3625	protein_coding	ADAMTS like 5 [Source:HGNC Symbol;Acc:HGNC:27912]	-
ENSG00000182831	813.041	560.011	0.535704	2.4e-07	5.85e-06	C16orf72	16	9091648	9121640	+	15875	protein_coding	chromosome 16 open reading frame 72 [Source:HGNC Symbol;Acc:HGNC:30103]	-
ENSG00000198467	6606.15	3039.65	1.12003	2.41e-07	5.86e-06	TPM2	9	35681992	35690121	-	3248	protein_coding	tropomyosin 2 [Source:HGNC Symbol;Acc:HGNC:12011]	-
ENSG00000100068	391.892	133.79	1.55375	2.43e-07	5.9e-06	LRP5L	22	25351418	25405377	-	4687	protein_coding	LDL receptor related protein 5 like [Source:HGNC Symbol;Acc:HGNC:25323]	-
ENSG00000198331	40.3311	94.4825	-1.24358	2.48e-07	6.01e-06	HYLS1	11	125883614	125900648	+	2999	protein_coding	HYLS1, centriolar and ciliogenesis associated [Source:HGNC Symbol;Acc:HGNC:26558]	-
ENSG00000104907	1496.99	667.857	1.16325	2.49e-07	6.04e-06	TRMT1	19	13104902	13117567	-	3364	protein_coding	tRNA methyltransferase 1 [Source:HGNC Symbol;Acc:HGNC:25980]	-
ENSG00000120910	182.879	98.5145	0.889994	2.51e-07	6.08e-06	PPP3CC	8	22440819	22541142	+	2899	protein_coding	protein phosphatase 3 catalytic subunit gamma [Source:HGNC Symbol;Acc:HGNC:9316]	-
ENSG00000115963	1875.04	995.127	0.914514	2.58e-07	6.24e-06	RND3	2	150468195	150539011	-	3594	protein_coding	Rho family GTPase 3 [Source:HGNC Symbol;Acc:HGNC:671]	-
ENSG00000161996	785.412	297.107	1.40113	2.6e-07	6.29e-06	WDR90	16	649311	667833	+	10534	protein_coding	WD repeat domain 90 [Source:HGNC Symbol;Acc:HGNC:26960]	-
ENSG00000120708	334.701	82.588	2.02194	2.7e-07	6.53e-06	TGFBI	5	136028895	136063818	+	7810	protein_coding	transforming growth factor beta induced [Source:HGNC Symbol;Acc:HGNC:11771]	-
ENSG00000168509	47.8444	107.89	-1.1869	2.72e-07	6.57e-06	HJV	1	146017468	146036746	-	2418	protein_coding	hemojuvelin BMP co-receptor [Source:HGNC Symbol;Acc:HGNC:4887]	-
ENSG00000159479	638.994	392.138	0.701973	2.76e-07	6.64e-06	MED8	1	43383917	43389808	-	2704	protein_coding	mediator complex subunit 8 [Source:HGNC Symbol;Acc:HGNC:19971]	-
ENSG00000242125	752.757	1896.86	-1.33541	2.79e-07	6.72e-06	SNHG3	1	28505980	28510892	+	4088	processed_transcript	small nucleolar RNA host gene 3 [Source:HGNC Symbol;Acc:HGNC:10118]	-
ENSG00000163659	665.114	311.569	1.09683	2.8e-07	6.73e-06	TIPARP	3	156673235	156706770	+	5048	protein_coding	TCDD inducible poly(ADP-ribose) polymerase [Source:HGNC Symbol;Acc:HGNC:23696]	-
ENSG00000100345	4214.02	2489.62	0.758823	2.81e-07	6.73e-06	MYH9	22	36281277	36388067	-	9012	protein_coding	myosin heavy chain 9 [Source:HGNC Symbol;Acc:HGNC:7579]	-
ENSG00000079335	218.908	122.361	0.837451	2.81e-07	6.73e-06	CDC14A	1	100345001	100520278	+	6511	protein_coding	cell division cycle 14A [Source:HGNC Symbol;Acc:HGNC:1718]	-
ENSG00000248333	1221.43	803.379	0.602773	2.84e-07	6.8e-06	CDK11B	1	1635227	1659012	-	3488	protein_coding	cyclin dependent kinase 11B [Source:HGNC Symbol;Acc:HGNC:1729]	-
ENSG00000152795	2698.93	3673.02	-0.443798	2.85e-07	6.82e-06	HNRNPDL	4	82422564	82430408	-	5476	protein_coding	heterogeneous nuclear ribonucleoprotein D like [Source:HGNC Symbol;Acc:HGNC:5037]	-
ENSG00000147509	142.946	60.596	1.23682	2.89e-07	6.91e-06	RGS20	8	53851808	53959303	+	3192	protein_coding	regulator of G protein signaling 20 [Source:HGNC Symbol;Acc:HGNC:14600]	-
ENSG00000248008	184.782	94.7687	0.957915	2.93e-07	6.99e-06	NRAV	12	120490328	120495940	-	1901	antisense	negative regulator of antiviral response [Source:HGNC Symbol;Acc:HGNC:48588]	-
ENSG00000047315	1868.73	2972.96	-0.668807	2.93e-07	6.99e-06	POLR2B	4	56977722	57031168	+	5901	protein_coding	RNA polymerase II subunit B [Source:HGNC Symbol;Acc:HGNC:9188]	-
ENSG00000123191	188.84	382.309	-1.01249	2.99e-07	7.12e-06	ATP7B	13	51930436	52012125	-	9671	protein_coding	ATPase copper transporting beta [Source:HGNC Symbol;Acc:HGNC:870]	-
ENSG00000163481	588.099	253.76	1.21	3.01e-07	7.17e-06	RNF25	2	218663864	218672411	-	2323	protein_coding	ring finger protein 25 [Source:HGNC Symbol;Acc:HGNC:14662]	-
ENSG00000139083	230.411	124.854	0.88188	3.02e-07	7.19e-06	ETV6	12	11649854	11895402	+	7075	protein_coding	ETS variant 6 [Source:HGNC Symbol;Acc:HGNC:3495]	ETS
ENSG00000054523	936.896	1425.02	-0.603633	3.03e-07	7.2e-06	KIF1B	1	10210805	10381603	+	17720	protein_coding	kinesin family member 1B [Source:HGNC Symbol;Acc:HGNC:16636]	-
ENSG00000120832	93.1958	184.833	-0.979556	3.07e-07	7.29e-06	MTERF2	12	106977291	106987166	-	3626	protein_coding	mitochondrial transcription termination factor 2 [Source:HGNC Symbol;Acc:HGNC:30779]	-
ENSG00000010318	39.0369	95.4711	-1.27372	3.1e-07	7.36e-06	PHF7	3	52410657	52423641	+	3367	protein_coding	PHD finger protein 7 [Source:HGNC Symbol;Acc:HGNC:18458]	-
ENSG00000232573	1024.67	489.721	1.06655	3.14e-07	7.44e-06	RPL3P4	14	98972879	98973301	-	423	processed_pseudogene	ribosomal protein L3 pseudogene 4 [Source:HGNC Symbol;Acc:HGNC:19805]	-
ENSG00000267279	58.6196	21.8818	1.42088	3.15e-07	7.44e-06	AC090409.1	18	61585746	61606916	-	1199	lincRNA	novel transcript	-
ENSG00000006432	501.51	307.126	0.710515	3.15e-07	7.44e-06	MAP3K9	14	70722526	70809534	-	12386	protein_coding	mitogen-activated protein kinase kinase kinase 9 [Source:HGNC Symbol;Acc:HGNC:6861]	-
ENSG00000196878	197.29	81.4922	1.27438	3.16e-07	7.45e-06	LAMB3	1	209614870	209652466	-	4688	protein_coding	laminin subunit beta 3 [Source:HGNC Symbol;Acc:HGNC:6490]	-
ENSG00000187772	152.137	495.565	-1.69632	3.18e-07	7.48e-06	LIN28B	6	104936616	105083332	+	6002	protein_coding	lin-28 homolog B [Source:HGNC Symbol;Acc:HGNC:32207]	CSD
ENSG00000132792	1198.5	839.272	0.514094	3.27e-07	7.69e-06	CTNNBL1	20	37693955	37872129	+	4148	protein_coding	catenin beta like 1 [Source:HGNC Symbol;Acc:HGNC:15879]	-
ENSG00000176407	1315.04	765.325	0.780365	3.35e-07	7.87e-06	KCMF1	2	84971093	85059472	+	7968	protein_coding	potassium channel modulatory factor 1 [Source:HGNC Symbol;Acc:HGNC:20589]	-
ENSG00000203867	441.266	267.917	0.7185	3.36e-07	7.9e-06	RBM20	10	110644397	110839469	+	8162	protein_coding	RNA binding motif protein 20 [Source:HGNC Symbol;Acc:HGNC:27424]	-
ENSG00000056487	224.568	90.5756	1.31373	3.4e-07	7.97e-06	PHF21B	22	44881162	45009999	-	5753	protein_coding	PHD finger protein 21B [Source:HGNC Symbol;Acc:HGNC:25161]	-
ENSG00000155906	423.849	247.365	0.773262	3.43e-07	8.04e-06	RMND1	6	151404762	151452181	-	4747	protein_coding	required for meiotic nuclear division 1 homolog [Source:HGNC Symbol;Acc:HGNC:21176]	-
ENSG00000172995	490.402	1376.03	-1.49139	3.49e-07	8.17e-06	ARPP21	3	35638945	35794496	+	10092	protein_coding	cAMP regulated phosphoprotein 21 [Source:HGNC Symbol;Acc:HGNC:16968]	-
ENSG00000275318	7.67586	33.8303	-2.12991	3.5e-07	8.19e-06	AL136981.2	9	92840955	92841688	-	734	unprocessed_pseudogene	novel zinc finger protein pseudogene	-
ENSG00000121454	17.4852	57.1777	-1.70068	3.53e-07	8.24e-06	LHX4	1	180230286	180278982	+	6061	protein_coding	LIM homeobox 4 [Source:HGNC Symbol;Acc:HGNC:21734]	Homeobox
ENSG00000073464	108.895	210.858	-0.959416	3.62e-07	8.46e-06	CLCN4	X	10156945	10237660	+	6789	protein_coding	chloride voltage-gated channel 4 [Source:HGNC Symbol;Acc:HGNC:2022]	-
ENSG00000175505	60.8562	19.328	1.63331	3.63e-07	8.47e-06	CLCF1	11	67364168	67374177	-	1975	protein_coding	cardiotrophin like cytokine factor 1 [Source:HGNC Symbol;Acc:HGNC:17412]	-
ENSG00000122257	487.888	1042.91	-1.09281	3.64e-07	8.48e-06	RBBP6	16	24537693	24572863	+	10475	protein_coding	RB binding protein 6, ubiquitin ligase [Source:HGNC Symbol;Acc:HGNC:9889]	-
ENSG00000108599	499.926	274.817	0.866524	3.66e-07	8.51e-06	AKAP10	17	19904302	19978343	-	4848	protein_coding	A-kinase anchoring protein 10 [Source:HGNC Symbol;Acc:HGNC:368]	-
ENSG00000088808	521.643	307.036	0.764825	3.66e-07	8.51e-06	PPP1R13B	14	103733195	103847590	-	9588	protein_coding	protein phosphatase 1 regulatory subunit 13B [Source:HGNC Symbol;Acc:HGNC:14950]	-
ENSG00000164961	548.512	907.437	-0.726159	3.7e-07	8.6e-06	WASHC5	8	125024260	125091840	-	4784	protein_coding	WASH complex subunit 5 [Source:HGNC Symbol;Acc:HGNC:28984]	-
ENSG00000156113	701.045	462.604	0.600811	3.71e-07	8.6e-06	KCNMA1	10	76869601	77638369	-	35644	protein_coding	potassium calcium-activated channel subfamily M alpha 1 [Source:HGNC Symbol;Acc:HGNC:6284]	-
ENSG00000117360	1309.97	727.746	0.846737	3.8e-07	8.8e-06	PRPF3	1	150321476	150353195	+	5373	protein_coding	pre-mRNA processing factor 3 [Source:HGNC Symbol;Acc:HGNC:17348]	-
ENSG00000127124	595.5	287.34	1.05437	3.81e-07	8.82e-06	HIVEP3	1	41506365	42035925	-	14410	protein_coding	human immunodeficiency virus type I enhancer binding protein 3 [Source:HGNC Symbol;Acc:HGNC:13561]	zf-C2H2
ENSG00000121005	193.425	385.599	-0.987686	3.88e-07	8.97e-06	CRISPLD1	8	74984515	75034558	+	4543	protein_coding	cysteine rich secretory protein LCCL domain containing 1 [Source:HGNC Symbol;Acc:HGNC:18206]	-
ENSG00000133111	35.2111	78.2585	-1.14301	3.9e-07	9.01e-06	RFXAP	13	36819224	36829104	+	2306	protein_coding	regulatory factor X associated protein [Source:HGNC Symbol;Acc:HGNC:9988]	-
ENSG00000242615	39.543	8.52201	2.24099	4.02e-07	9.28e-06	AC022415.1	19	12141806	12143322	-	1517	transcribed_processed_pseudogene	ribosomal protein L17 (RPL17) pseudogene	-
ENSG00000279443	5.46872	29.4891	-2.47453	4.08e-07	9.39e-06	AL513497.1	1	28544460	28546542	+	2083	TEC	TEC	-
ENSG00000106665	1144.77	627.812	0.865342	4.08e-07	9.4e-06	CLIP2	7	74289475	74405943	+	7315	protein_coding	CAP-Gly domain containing linker protein 2 [Source:HGNC Symbol;Acc:HGNC:2586]	-
ENSG00000164163	1587.77	2714.03	-0.77292	4.11e-07	9.45e-06	ABCE1	4	145097932	145129179	+	6265	protein_coding	ATP binding cassette subfamily E member 1 [Source:HGNC Symbol;Acc:HGNC:69]	-
ENSG00000174371	246.928	427.974	-0.793895	4.16e-07	9.56e-06	EXO1	1	241847967	241895148	+	4140	protein_coding	exonuclease 1 [Source:HGNC Symbol;Acc:HGNC:3511]	-
ENSG00000167291	412.975	872.099	-1.07916	4.25e-07	9.76e-06	TBC1D16	17	79932343	80035848	-	11555	protein_coding	TBC1 domain family member 16 [Source:HGNC Symbol;Acc:HGNC:28356]	-
ENSG00000268001	9.7491	38.3648	-1.92881	4.26e-07	9.76e-06	CARD8-AS1	19	48255675	48258199	+	1969	antisense	CARD8 antisense RNA 1 [Source:HGNC Symbol;Acc:HGNC:51408]	-
ENSG00000143061	707.065	1331.44	-0.9155	4.33e-07	9.9e-06	IGSF3	1	116574399	116667755	-	7400	protein_coding	immunoglobulin superfamily member 3 [Source:HGNC Symbol;Acc:HGNC:5950]	-
ENSG00000092201	1303.44	2082.37	-0.675159	4.35e-07	9.94e-06	SUPT16H	14	21351472	21384266	-	7151	protein_coding	SPT16 homolog, facilitates chromatin remodeling subunit [Source:HGNC Symbol;Acc:HGNC:11465]	-
ENSG00000279348	3.8937	29.0529	-2.83628	4.46e-07	1.02e-05	AC012513.3	2	216211404	216213519	+	2116	TEC	TEC	-
ENSG00000256537	161.345	347.68	-1.11346	4.47e-07	1.02e-05	SMIM10L1	12	11171222	11176016	+	4795	protein_coding	small integral membrane protein 10 like 1 [Source:HGNC Symbol;Acc:HGNC:49847]	-
ENSG00000171320	169.619	329.201	-0.953215	4.48e-07	1.02e-05	ESCO2	8	27771949	27812640	+	7973	protein_coding	establishment of sister chromatid cohesion N-acetyltransferase 2 [Source:HGNC Symbol;Acc:HGNC:27230]	-
ENSG00000174684	230.878	410.399	-0.830601	4.53e-07	1.03e-05	B4GAT1	11	66345372	66347692	-	2072	protein_coding	beta-1,4-glucuronyltransferase 1 [Source:HGNC Symbol;Acc:HGNC:15685]	-
ENSG00000160213	1137.92	600.081	0.924264	4.54e-07	1.03e-05	CSTB	21	43772511	43776445	-	3935	protein_coding	cystatin B [Source:HGNC Symbol;Acc:HGNC:2482]	-
ENSG00000181585	80.6573	28.8495	1.49407	4.59e-07	1.04e-05	TMIE	3	46694528	46710886	+	1936	protein_coding	transmembrane inner ear [Source:HGNC Symbol;Acc:HGNC:30800]	-
ENSG00000204525	1142.82	732.846	0.641949	4.63e-07	1.05e-05	HLA-C	6	31268749	31272130	-	2507	protein_coding	major histocompatibility complex, class I, C [Source:HGNC Symbol;Acc:HGNC:4933]	-
ENSG00000165072	105.223	233.18	-1.14292	4.64e-07	1.05e-05	MAMDC2	9	70043581	70226970	+	3854	protein_coding	MAM domain containing 2 [Source:HGNC Symbol;Acc:HGNC:23673]	-
ENSG00000139372	1051.83	1770.45	-0.750031	4.68e-07	1.06e-05	TDG	12	103965804	103988874	+	4903	protein_coding	thymine DNA glycosylase [Source:HGNC Symbol;Acc:HGNC:11700]	-
ENSG00000249884	21.0366	3.40365	2.61617	4.7e-07	1.06e-05	RNF103-CHMP3	2	86505668	86721122	-	1503	protein_coding	RNF103-CHMP3 readthrough [Source:HGNC Symbol;Acc:HGNC:38847]	-
ENSG00000186687	271.822	515.618	-0.918077	4.76e-07	1.08e-05	LYRM7	5	131170810	131205426	+	6351	protein_coding	LYR motif containing 7 [Source:HGNC Symbol;Acc:HGNC:28072]	-
ENSG00000137501	278.613	79.7644	1.80886	4.77e-07	1.08e-05	SYTL2	11	85694224	85811159	-	11258	protein_coding	synaptotagmin like 2 [Source:HGNC Symbol;Acc:HGNC:15585]	-
ENSG00000088876	201.972	116.994	0.787032	4.77e-07	1.08e-05	ZNF343	20	2481817	2524702	-	4643	protein_coding	zinc finger protein 343 [Source:HGNC Symbol;Acc:HGNC:16017]	zf-C2H2
ENSG00000128567	119.032	288.505	-1.2834	4.78e-07	1.08e-05	PODXL	7	131500262	131558217	-	6874	protein_coding	podocalyxin like [Source:HGNC Symbol;Acc:HGNC:9171]	-
ENSG00000117906	809.139	1359.81	-0.748329	4.81e-07	1.08e-05	RCN2	15	76931619	76954392	+	10019	protein_coding	reticulocalbin 2 [Source:HGNC Symbol;Acc:HGNC:9935]	-
ENSG00000137449	107.721	32.6417	1.7327	4.85e-07	1.09e-05	CPEB2	4	15002674	15070153	+	7177	protein_coding	cytoplasmic polyadenylation element binding protein 2 [Source:HGNC Symbol;Acc:HGNC:21745]	-
ENSG00000089163	131.662	70.7303	0.899062	4.85e-07	1.09e-05	SIRT4	12	120302316	120313249	+	1222	protein_coding	sirtuin 4 [Source:HGNC Symbol;Acc:HGNC:14932]	-
ENSG00000108309	77.7094	29.0189	1.42847	4.9e-07	1.1e-05	RUNDC3A	17	44308413	44318671	+	4905	protein_coding	RUN domain containing 3A [Source:HGNC Symbol;Acc:HGNC:16984]	-
ENSG00000223802	158.352	69.7905	1.17824	4.91e-07	1.1e-05	CERS1	19	18868545	18896727	-	3753	protein_coding	ceramide synthase 1 [Source:HGNC Symbol;Acc:HGNC:14253]	-
ENSG00000161547	987.281	2042.45	-1.05041	4.92e-07	1.1e-05	SRSF2	17	76734115	76737374	-	3017	protein_coding	serine and arginine rich splicing factor 2 [Source:HGNC Symbol;Acc:HGNC:10783]	-
ENSG00000171928	391.522	214.124	0.873791	4.97e-07	1.11e-05	TVP23B	17	18780995	18806714	+	5862	protein_coding	trans-golgi network vesicle protein 23 homolog B [Source:HGNC Symbol;Acc:HGNC:20399]	-
ENSG00000274641	36.0149	3.55958	3.30588	4.99e-07	1.12e-05	HIST1H2BO	6	27893463	27893843	+	381	protein_coding	histone cluster 1 H2B family member o [Source:HGNC Symbol;Acc:HGNC:4758]	-
ENSG00000090924	731.064	398.032	0.874679	5.08e-07	1.13e-05	PLEKHG2	19	39412585	39428415	+	9200	protein_coding	pleckstrin homology and RhoGEF domain containing G2 [Source:HGNC Symbol;Acc:HGNC:29515]	-
ENSG00000139174	87.5597	218.736	-1.33792	5.14e-07	1.15e-05	PRICKLE1	12	42456757	42590355	-	8247	protein_coding	prickle planar cell polarity protein 1 [Source:HGNC Symbol;Acc:HGNC:17019]	-
ENSG00000275088	8.08724	37.3765	-2.25059	5.25e-07	1.17e-05	AC026469.1	16	85142696	85146001	-	3306	lincRNA	novel transcript	-
ENSG00000147526	714.166	1029.37	-0.526662	5.4e-07	1.2e-05	TACC1	8	38728186	38853028	+	12609	protein_coding	transforming acidic coiled-coil containing protein 1 [Source:HGNC Symbol;Acc:HGNC:11522]	-
ENSG00000136104	503.407	732.223	-0.541694	5.47e-07	1.22e-05	RNASEH2B	13	50909678	51024120	+	26291	protein_coding	ribonuclease H2 subunit B [Source:HGNC Symbol;Acc:HGNC:25671]	-
ENSG00000130811	2658.24	1144.26	1.21535	5.73e-07	1.27e-05	EIF3G	19	10115017	10119918	-	3486	protein_coding	eukaryotic translation initiation factor 3 subunit G [Source:HGNC Symbol;Acc:HGNC:3274]	-
ENSG00000167657	953.42	463.793	1.03784	5.77e-07	1.28e-05	DAPK3	19	3958453	3971123	-	3549	protein_coding	death associated protein kinase 3 [Source:HGNC Symbol;Acc:HGNC:2676]	-
ENSG00000116885	72.4456	30.7095	1.24626	5.99e-07	1.33e-05	OSCP1	1	36415827	36450451	-	2788	protein_coding	organic solute carrier partner 1 [Source:HGNC Symbol;Acc:HGNC:29971]	-
ENSG00000119321	772.966	476.565	0.700101	6.03e-07	1.33e-05	FKBP15	9	113161006	113221361	-	11060	protein_coding	FK506 binding protein 15 [Source:HGNC Symbol;Acc:HGNC:23397]	-
ENSG00000023330	1061.96	641.735	0.72465	6.05e-07	1.34e-05	ALAS1	3	52198086	52214327	+	2536	protein_coding	5'-aminolevulinate synthase 1 [Source:HGNC Symbol;Acc:HGNC:396]	-
ENSG00000163872	1243.08	614.419	1.01785	6.08e-07	1.34e-05	YEATS2	3	183697818	183812625	+	10212	protein_coding	YEATS domain containing 2 [Source:HGNC Symbol;Acc:HGNC:25489]	-
ENSG00000183604	129.471	41.9092	1.62202	6.08e-07	1.34e-05	SMG1P5	16	30267553	30335374	-	4791	transcribed_unprocessed_pseudogene	SMG1 pseudogene 5 [Source:HGNC Symbol;Acc:HGNC:49862]	-
ENSG00000038427	453.264	1446.7	-1.67159	6.09e-07	1.34e-05	VCAN	5	83471465	83582303	+	14831	protein_coding	versican [Source:HGNC Symbol;Acc:HGNC:2464]	-
ENSG00000135525	26.5798	7.27712	1.88429	6.17e-07	1.36e-05	MAP7	6	136342281	136550819	-	5447	protein_coding	microtubule associated protein 7 [Source:HGNC Symbol;Acc:HGNC:6869]	-
ENSG00000148730	487.369	1142.61	-1.23279	6.26e-07	1.38e-05	EIF4EBP2	10	70404379	70428618	+	7257	protein_coding	eukaryotic translation initiation factor 4E binding protein 2 [Source:HGNC Symbol;Acc:HGNC:3289]	-
ENSG00000237424	114.555	51.8193	1.1557	6.28e-07	1.38e-05	FOXD2-AS1	1	47432133	47434641	-	2509	lincRNA	FOXD2 adjacent opposite strand RNA 1 [Source:HGNC Symbol;Acc:HGNC:44256]	-
ENSG00000090376	78.386	156.059	-0.982587	6.3e-07	1.38e-05	IRAK3	12	66188879	66254622	+	10004	protein_coding	interleukin 1 receptor associated kinase 3 [Source:HGNC Symbol;Acc:HGNC:17020]	-
ENSG00000171045	252.264	137.959	0.869013	6.46e-07	1.42e-05	TSNARE1	8	142212080	142403240	-	4070	protein_coding	t-SNARE domain containing 1 [Source:HGNC Symbol;Acc:HGNC:26437]	-
ENSG00000246363	1144.29	2320.46	-1.0187	6.48e-07	1.42e-05	LINC02458	12	89010681	89019679	-	2941	lincRNA	long intergenic non-protein coding RNA 2458 [Source:HGNC Symbol;Acc:HGNC:53394]	-
ENSG00000118369	266.386	126.979	1.07397	6.52e-07	1.43e-05	USP35	11	78188812	78214711	+	5233	protein_coding	ubiquitin specific peptidase 35 [Source:HGNC Symbol;Acc:HGNC:20061]	-
ENSG00000273343	0.489846	20.2988	-5.14675	6.64e-07	1.45e-05	AC007663.4	22	20318119	20318749	-	631	sense_intronic	novel transcript, sense intronic to DGCR6L	-
ENSG00000125952	315.83	199.867	0.656795	6.68e-07	1.46e-05	MAX	14	65006174	65102695	-	4430	protein_coding	MYC associated factor X [Source:HGNC Symbol;Acc:HGNC:6913]	bHLH
ENSG00000164741	81.8787	23.8072	1.79416	6.72e-07	1.47e-05	DLC1	8	13083361	13604610	-	12794	protein_coding	DLC1 Rho GTPase activating protein [Source:HGNC Symbol;Acc:HGNC:2897]	-
ENSG00000145794	1194.98	2518.24	-1.07401	6.78e-07	1.48e-05	MEGF10	5	127290831	127465737	+	9007	protein_coding	multiple EGF like domains 10 [Source:HGNC Symbol;Acc:HGNC:29634]	-
ENSG00000198826	164.344	325.919	-0.97845	6.87e-07	1.5e-05	ARHGAP11A	15	32615144	32639949	+	6428	protein_coding	Rho GTPase activating protein 11A [Source:HGNC Symbol;Acc:HGNC:15783]	-
ENSG00000085491	666.917	1153.14	-0.788787	6.9e-07	1.5e-05	SLC25A24	1	108134036	108200849	-	6733	protein_coding	solute carrier family 25 member 24 [Source:HGNC Symbol;Acc:HGNC:20662]	-
ENSG00000060491	1817.07	942.641	0.945995	6.91e-07	1.5e-05	OGFR	20	62804835	62814000	+	4702	protein_coding	opioid growth factor receptor [Source:HGNC Symbol;Acc:HGNC:15768]	-
ENSG00000179348	408.248	197.633	1.04527	6.91e-07	1.5e-05	GATA2	3	128479427	128493185	-	4459	protein_coding	GATA binding protein 2 [Source:HGNC Symbol;Acc:HGNC:4171]	zf-GATA
ENSG00000120696	70.4971	150.047	-1.07267	6.99e-07	1.52e-05	KBTBD7	13	41189833	41194566	-	4734	protein_coding	kelch repeat and BTB domain containing 7 [Source:HGNC Symbol;Acc:HGNC:25266]	-
ENSG00000215270	30.914	74.122	-1.25558	7.04e-07	1.53e-05	AP000523.1	22	15854195	15855243	-	1049	processed_pseudogene	translocase of outer mitochondrial membrane 40 homolog (TOMM40) pseudogene	-
ENSG00000122133	122.393	1.02992	6.86901	7.08e-07	1.53e-05	PAEP	9	135561756	135566955	+	1454	protein_coding	progestagen associated endometrial protein [Source:HGNC Symbol;Acc:HGNC:8573]	-
ENSG00000101347	214.984	395.581	-0.883004	7.12e-07	1.54e-05	SAMHD1	20	36889773	36951901	-	11261	protein_coding	SAM and HD domain containing deoxynucleoside triphosphate triphosphohydrolase 1 [Source:HGNC Symbol;Acc:HGNC:15925]	-
ENSG00000164303	21.5007	67.431	-1.68484	7.15e-07	1.54e-05	ENPP6	4	184088706	184221230	-	4703	protein_coding	ectonucleotide pyrophosphatase/phosphodiesterase 6 [Source:HGNC Symbol;Acc:HGNC:23409]	-
ENSG00000168884	572.697	292.138	0.968104	7.26e-07	1.57e-05	TNIP2	4	2741648	2756376	-	2686	protein_coding	TNFAIP3 interacting protein 2 [Source:HGNC Symbol;Acc:HGNC:19118]	-
ENSG00000163389	124.109	268.638	-1.12402	7.43e-07	1.6e-05	POGLUT1	3	119468938	119494708	+	7097	protein_coding	protein O-glucosyltransferase 1 [Source:HGNC Symbol;Acc:HGNC:22954]	-
ENSG00000007402	61.1279	123.554	-1.00636	7.59e-07	1.63e-05	CACNA2D2	3	50362799	50504244	-	6322	protein_coding	calcium voltage-gated channel auxiliary subunit alpha2delta 2 [Source:HGNC Symbol;Acc:HGNC:1400]	-
ENSG00000166670	10.1318	0	6.62232	7.6e-07	1.63e-05	MMP10	11	102770503	102780628	-	1758	protein_coding	matrix metallopeptidase 10 [Source:HGNC Symbol;Acc:HGNC:7156]	-
ENSG00000112561	193.402	96.2635	1.01004	7.61e-07	1.64e-05	TFEB	6	41683978	41736259	-	5648	protein_coding	transcription factor EB [Source:HGNC Symbol;Acc:HGNC:11753]	bHLH
ENSG00000171790	5.78204	33.2966	-2.57175	7.66e-07	1.64e-05	SLFNL1	1	41015597	41023237	-	4310	protein_coding	schlafen like 1 [Source:HGNC Symbol;Acc:HGNC:26313]	-
ENSG00000108387	193.205	300.959	-0.642452	7.66e-07	1.64e-05	2021-09-04	17	58520250	58540818	-	8012	protein_coding	septin 4 [Source:HGNC Symbol;Acc:HGNC:9165]	-
ENSG00000162989	49.0914	108.447	-1.14977	7.68e-07	1.65e-05	KCNJ3	2	154698299	154858352	+	5067	protein_coding	potassium voltage-gated channel subfamily J member 3 [Source:HGNC Symbol;Acc:HGNC:6264]	-
ENSG00000214655	852.761	364.604	1.22374	7.73e-07	1.66e-05	ZSWIM8	10	73785582	73801797	+	7953	protein_coding	zinc finger SWIM-type containing 8 [Source:HGNC Symbol;Acc:HGNC:23528]	-
ENSG00000145386	805.805	1409.51	-0.808076	7.77e-07	1.66e-05	CCNA2	4	121816444	121823933	-	2798	protein_coding	cyclin A2 [Source:HGNC Symbol;Acc:HGNC:1578]	-
ENSG00000166171	265.707	131.449	1.02124	7.79e-07	1.66e-05	DPCD	10	101570560	101609668	+	1718	protein_coding	deleted in primary ciliary dyskinesia homolog (mouse) [Source:HGNC Symbol;Acc:HGNC:24542]	-
ENSG00000277075	55.7557	11.6975	2.24183	7.83e-07	1.67e-05	HIST1H2AE	6	26216975	26217483	+	509	protein_coding	histone cluster 1 H2A family member e [Source:HGNC Symbol;Acc:HGNC:4724]	-
ENSG00000099625	416.478	130.628	1.66934	7.84e-07	1.67e-05	CBARP	19	1228287	1238027	-	4591	protein_coding	CACN subunit beta associated regulatory protein [Source:HGNC Symbol;Acc:HGNC:28617]	-
ENSG00000187479	276.444	86.1672	1.68617	7.88e-07	1.68e-05	C11orf96	11	43942505	43944338	+	1834	protein_coding	chromosome 11 open reading frame 96 [Source:HGNC Symbol;Acc:HGNC:38675]	-
ENSG00000225855	33.4481	94.3146	-1.47753	7.89e-07	1.68e-05	RUSC1-AS1	1	155316863	155324176	-	3516	antisense	RUSC1 antisense RNA 1 [Source:HGNC Symbol;Acc:HGNC:26680]	-
ENSG00000101421	1805.45	1129.58	0.677213	8.07e-07	1.72e-05	CHMP4B	20	33811304	33854366	+	1646	protein_coding	charged multivesicular body protein 4B [Source:HGNC Symbol;Acc:HGNC:16171]	-
ENSG00000140577	449.687	287.015	0.644762	8.32e-07	1.77e-05	CRTC3	15	90529925	90645345	+	10814	protein_coding	CREB regulated transcription coactivator 3 [Source:HGNC Symbol;Acc:HGNC:26148]	-
ENSG00000106692	297.866	533.408	-0.834936	8.35e-07	1.77e-05	FKTN	9	105558130	105641118	+	8747	protein_coding	fukutin [Source:HGNC Symbol;Acc:HGNC:3622]	-
ENSG00000179335	1342.21	402.822	1.73725	8.45e-07	1.79e-05	CLK3	15	74598500	74645414	+	20443	protein_coding	CDC like kinase 3 [Source:HGNC Symbol;Acc:HGNC:2071]	-
ENSG00000196814	222.038	464.32	-1.07161	8.56e-07	1.81e-05	MVB12B	9	126326849	126507041	+	7884	protein_coding	multivesicular body subunit 12B [Source:HGNC Symbol;Acc:HGNC:23368]	-
ENSG00000169220	215.682	106.979	1.01889	8.65e-07	1.83e-05	RGS14	5	177357837	177372601	+	3797	protein_coding	regulator of G protein signaling 14 [Source:HGNC Symbol;Acc:HGNC:9996]	-
ENSG00000172602	69.8094	20.8032	1.72945	8.75e-07	1.85e-05	RND1	12	48857145	48865898	-	3976	protein_coding	Rho family GTPase 1 [Source:HGNC Symbol;Acc:HGNC:18314]	-
ENSG00000140598	426.535	239.637	0.8358	8.79e-07	1.86e-05	EFL1	15	82130230	82262763	-	4740	protein_coding	elongation factor like GTPase 1 [Source:HGNC Symbol;Acc:HGNC:25789]	-
ENSG00000225980	40.0836	0.919276	5.43675	8.83e-07	1.86e-05	OR7E19P	19	9265440	9268819	-	968	transcribed_unprocessed_pseudogene	olfactory receptor family 7 subfamily E member 19 pseudogene [Source:HGNC Symbol;Acc:HGNC:8390]	-
ENSG00000105880	74.6018	22.7659	1.72119	9.01e-07	1.9e-05	DLX5	7	97020392	97024950	-	1748	protein_coding	distal-less homeobox 5 [Source:HGNC Symbol;Acc:HGNC:2918]	Homeobox
ENSG00000197780	575.847	392.82	0.552539	9.04e-07	1.9e-05	TAF13	1	109062486	109076002	-	1400	protein_coding	TATA-box binding protein associated factor 13 [Source:HGNC Symbol;Acc:HGNC:11546]	-
ENSG00000123870	24.7172	63.6119	-1.34968	9.12e-07	1.92e-05	ZNF137P	19	52588505	52597345	+	2029	transcribed_unprocessed_pseudogene	zinc finger protein 137, pseudogene [Source:HGNC Symbol;Acc:HGNC:12921]	-
ENSG00000188483	266.801	105.608	1.34137	9.28e-07	1.95e-05	IER5L	9	129175552	129178262	-	2711	protein_coding	immediate early response 5 like [Source:HGNC Symbol;Acc:HGNC:23679]	-
ENSG00000180596	68.2451	24.5125	1.46577	9.3e-07	1.95e-05	HIST1H2BC	6	26114873	26123926	-	834	protein_coding	histone cluster 1 H2B family member c [Source:HGNC Symbol;Acc:HGNC:4757]	-
ENSG00000254198	24.3044	66.0504	-1.4625	9.3e-07	1.95e-05	AC113191.1	8	43125995	43126397	-	403	processed_pseudogene	Family with sequence similarity 9, member C (FAM9C) pseudogene	-
ENSG00000172638	291.333	158.716	0.879234	9.31e-07	1.95e-05	EFEMP2	11	65866441	65873592	-	5397	protein_coding	EGF containing fibulin extracellular matrix protein 2 [Source:HGNC Symbol;Acc:HGNC:3219]	-
ENSG00000124116	19.4181	1.43614	3.75692	9.42e-07	1.97e-05	WFDC3	20	45747944	45791932	-	2405	protein_coding	WAP four-disulfide core domain 3 [Source:HGNC Symbol;Acc:HGNC:15957]	-
ENSG00000116584	4456.77	2418.1	0.881646	9.62e-07	2.01e-05	ARHGEF2	1	155946851	156007070	-	9135	protein_coding	Rho/Rac guanine nucleotide exchange factor 2 [Source:HGNC Symbol;Acc:HGNC:682]	-
ENSG00000029534	289.366	767.538	-1.41273	9.63e-07	2.01e-05	ANK1	8	41653220	41896762	-	10797	protein_coding	ankyrin 1 [Source:HGNC Symbol;Acc:HGNC:492]	-
ENSG00000149016	206.009	87.8396	1.22155	9.73e-07	2.03e-05	TUT1	11	62575045	62592177	-	4082	protein_coding	terminal uridylyl transferase 1, U6 snRNA-specific [Source:HGNC Symbol;Acc:HGNC:26184]	-
ENSG00000214176	230.592	116.946	0.974104	9.77e-07	2.04e-05	PLEKHM1P1	17	64779259	64837154	-	8469	transcribed_unprocessed_pseudogene	pleckstrin homology and RUN domain containing M1 pseudogene 1 [Source:HGNC Symbol;Acc:HGNC:35411]	-
ENSG00000166441	11355.2	7765.9	0.548026	9.78e-07	2.04e-05	RPL27A	11	8682411	8714759	+	7193	protein_coding	ribosomal protein L27a [Source:HGNC Symbol;Acc:HGNC:10329]	-
ENSG00000112425	11.3735	37.8733	-1.74107	9.8e-07	2.04e-05	EPM2A	6	145382535	145736023	-	18617	protein_coding	EPM2A, laforin glucan phosphatase [Source:HGNC Symbol;Acc:HGNC:3413]	-
ENSG00000104695	1212.65	776.118	0.642076	9.92e-07	2.06e-05	PPP2CB	8	30774457	30814314	-	4516	protein_coding	protein phosphatase 2 catalytic subunit beta [Source:HGNC Symbol;Acc:HGNC:9300]	-
ENSG00000071575	1698.45	994.636	0.773156	1.02e-06	2.13e-05	TRIB2	2	12716889	12742734	+	4588	protein_coding	tribbles pseudokinase 2 [Source:HGNC Symbol;Acc:HGNC:30809]	-
ENSG00000116194	25.1116	67.8511	-1.43126	1.03e-06	2.13e-05	ANGPTL1	1	178849705	178871052	-	3403	protein_coding	angiopoietin like 1 [Source:HGNC Symbol;Acc:HGNC:489]	-
ENSG00000261061	28.9692	70.8496	-1.30436	1.03e-06	2.14e-05	AC092718.4	16	81030770	81031485	+	716	sense_intronic	novel transcript	-
ENSG00000169203	67.7453	25.8175	1.40396	1.04e-06	2.15e-05	NPIPB12	16	29483642	29505999	-	4331	protein_coding	nuclear pore complex interacting protein family, member B12 [Source:HGNC Symbol;Acc:HGNC:37491]	-
ENSG00000100479	151.877	312.699	-1.03611	1.04e-06	2.16e-05	POLE2	14	49643555	49688422	-	2955	protein_coding	DNA polymerase epsilon 2, accessory subunit [Source:HGNC Symbol;Acc:HGNC:9178]	-
ENSG00000068489	319.462	669.453	-1.07238	1.04e-06	2.16e-05	PRR11	17	59155499	59204705	+	4080	protein_coding	proline rich 11 [Source:HGNC Symbol;Acc:HGNC:25619]	-
ENSG00000116539	690.803	1075.23	-0.636883	1.06e-06	2.18e-05	ASH1L	1	155335268	155562807	-	13296	protein_coding	ASH1 like histone lysine methyltransferase [Source:HGNC Symbol;Acc:HGNC:19088]	Others
ENSG00000198551	225.575	110.378	1.03838	1.09e-06	2.24e-05	ZNF627	19	11559374	11619135	+	3827	protein_coding	zinc finger protein 627 [Source:HGNC Symbol;Acc:HGNC:30570]	zf-C2H2
ENSG00000108924	87.1535	188.194	-1.09801	1.12e-06	2.3e-05	HLF	17	55265012	55325065	+	6602	protein_coding	HLF, PAR bZIP transcription factor [Source:HGNC Symbol;Acc:HGNC:4977]	TF_bZIP
ENSG00000160229	10.4583	42.9709	-2.01386	1.12e-06	2.31e-05	ZNF66	19	20776304	20807322	+	3009	protein_coding	zinc finger protein 66 [Source:HGNC Symbol;Acc:HGNC:13135]	zf-C2H2
ENSG00000253276	338.218	159.718	1.07813	1.14e-06	2.35e-05	CCDC71L	7	106656765	106660996	-	4232	protein_coding	coiled-coil domain containing 71 like [Source:HGNC Symbol;Acc:HGNC:26685]	-
ENSG00000204103	30.3763	8.12796	1.89855	1.14e-06	2.35e-05	MAFB	20	40685848	40689240	-	3393	protein_coding	MAF bZIP transcription factor B [Source:HGNC Symbol;Acc:HGNC:6408]	TF_bZIP
ENSG00000110011	218.821	87.4459	1.32773	1.14e-06	2.35e-05	DNAJC4	11	64230278	64234286	+	2807	protein_coding	DnaJ heat shock protein family (Hsp40) member C4 [Source:HGNC Symbol;Acc:HGNC:5271]	-
ENSG00000196544	110.396	42.2112	1.3801	1.15e-06	2.36e-05	BORCS6	17	8188333	8190907	-	2575	protein_coding	BLOC-1 related complex subunit 6 [Source:HGNC Symbol;Acc:HGNC:25939]	-
ENSG00000024862	236.411	100.586	1.23924	1.16e-06	2.38e-05	CCDC28A	6	138773509	138793319	+	1507	protein_coding	coiled-coil domain containing 28A [Source:HGNC Symbol;Acc:HGNC:21098]	-
ENSG00000224032	354.039	226.701	0.644312	1.17e-06	2.39e-05	EPB41L4A-AS1	5	112160526	112164276	+	3344	lincRNA	EPB41L4A antisense RNA 1 [Source:HGNC Symbol;Acc:HGNC:30749]	-
ENSG00000075975	988.516	652.365	0.597418	1.18e-06	2.42e-05	MKRN2	3	12557014	12583713	+	2848	protein_coding	makorin ring finger protein 2 [Source:HGNC Symbol;Acc:HGNC:7113]	-
ENSG00000155629	129.055	234.134	-0.849901	1.19e-06	2.43e-05	PIK3AP1	10	96593312	96720514	-	5691	protein_coding	phosphoinositide-3-kinase adaptor protein 1 [Source:HGNC Symbol;Acc:HGNC:30034]	-
ENSG00000065491	253.849	153.611	0.719765	1.19e-06	2.43e-05	TBC1D22B	6	37257772	37332970	+	3462	protein_coding	TBC1 domain family member 22B [Source:HGNC Symbol;Acc:HGNC:21602]	-
ENSG00000205542	15082.4	9450.62	0.674541	1.19e-06	2.43e-05	TMSB4X	X	12975108	12977227	+	1705	protein_coding	thymosin beta 4 X-linked [Source:HGNC Symbol;Acc:HGNC:11881]	-
ENSG00000160194	486.765	299.738	0.696551	1.2e-06	2.45e-05	NDUFV3	21	42879644	42913304	+	6345	protein_coding	NADH:ubiquinone oxidoreductase subunit V3 [Source:HGNC Symbol;Acc:HGNC:7719]	-
ENSG00000185104	1400.85	975.301	0.521554	1.24e-06	2.52e-05	FAF1	1	50437028	50960263	-	7545	protein_coding	Fas associated factor 1 [Source:HGNC Symbol;Acc:HGNC:3578]	-
ENSG00000279059	23.7977	68.1387	-1.49152	1.24e-06	2.53e-05	AC007485.2	17	54956760	54958426	-	1667	TEC	TEC	-
ENSG00000196312	245.312	404.58	-0.723982	1.25e-06	2.54e-05	MFSD14C	9	96887373	97013708	-	12153	protein_coding	major facilitator superfamily domain containing 14C [Source:HGNC Symbol;Acc:HGNC:23672]	-
ENSG00000131067	934.799	609.201	0.615889	1.25e-06	2.54e-05	GGT7	20	34844720	34872860	-	2966	protein_coding	gamma-glutamyltransferase 7 [Source:HGNC Symbol;Acc:HGNC:4259]	-
ENSG00000198732	160.507	398.733	-1.32224	1.25e-06	2.54e-05	SMOC1	14	69854131	70032366	+	4369	protein_coding	SPARC related modular calcium binding 1 [Source:HGNC Symbol;Acc:HGNC:20318]	-
ENSG00000151640	1054.34	482.005	1.13057	1.26e-06	2.55e-05	DPYSL4	10	132186900	132205776	+	3176	protein_coding	dihydropyrimidinase like 4 [Source:HGNC Symbol;Acc:HGNC:3016]	-
ENSG00000135625	87.4187	26.9118	1.68633	1.27e-06	2.57e-05	EGR4	2	73290929	73293705	-	2377	protein_coding	early growth response 4 [Source:HGNC Symbol;Acc:HGNC:3241]	zf-C2H2
ENSG00000131759	658.197	399.598	0.721642	1.28e-06	2.59e-05	RARA	17	40309192	40357643	+	4731	protein_coding	retinoic acid receptor alpha [Source:HGNC Symbol;Acc:HGNC:9864]	THR-like
ENSG00000148572	362.921	221.051	0.717652	1.29e-06	2.61e-05	NRBF2	10	63133247	63155031	+	1901	protein_coding	nuclear receptor binding factor 2 [Source:HGNC Symbol;Acc:HGNC:19692]	-
ENSG00000143126	282.968	650.762	-1.20684	1.3e-06	2.62e-05	CELSR2	1	109250019	109275750	+	12349	protein_coding	cadherin EGF LAG seven-pass G-type receptor 2 [Source:HGNC Symbol;Acc:HGNC:3231]	-
ENSG00000156219	24.5808	63.3371	-1.34661	1.33e-06	2.68e-05	ART3	4	76011184	76112802	+	3278	protein_coding	ADP-ribosyltransferase 3 [Source:HGNC Symbol;Acc:HGNC:725]	-
ENSG00000170454	60.8873	9.78121	2.62354	1.34e-06	2.7e-05	KRT75	12	52424070	52434525	-	2324	protein_coding	keratin 75 [Source:HGNC Symbol;Acc:HGNC:24431]	-
ENSG00000182040	88.1118	38.4804	1.19411	1.37e-06	2.75e-05	USH1G	17	74916084	74923256	-	3558	protein_coding	USH1 protein network component sans [Source:HGNC Symbol;Acc:HGNC:16356]	-
ENSG00000117385	958.503	615.293	0.641291	1.38e-06	2.77e-05	P3H1	1	42746335	42767084	-	6766	protein_coding	prolyl 3-hydroxylase 1 [Source:HGNC Symbol;Acc:HGNC:19316]	-
ENSG00000277161	119.202	315.68	-1.41679	1.38e-06	2.77e-05	PIGW	17	36535020	36539310	+	2799	protein_coding	phosphatidylinositol glycan anchor biosynthesis class W [Source:HGNC Symbol;Acc:HGNC:23213]	-
ENSG00000198794	238.64	423.833	-0.830327	1.4e-06	2.8e-05	SCAMP5	15	74957219	75021496	+	4873	protein_coding	secretory carrier membrane protein 5 [Source:HGNC Symbol;Acc:HGNC:30386]	-
ENSG00000147231	231.049	604.384	-1.38137	1.4e-06	2.8e-05	CXorf57	X	106611930	106679442	+	4853	protein_coding	chromosome X open reading frame 57 [Source:HGNC Symbol;Acc:HGNC:25486]	-
ENSG00000126775	421.187	248.123	0.761731	1.41e-06	2.82e-05	ATG14	14	55366392	55411858	-	5052	protein_coding	autophagy related 14 [Source:HGNC Symbol;Acc:HGNC:19962]	-
ENSG00000106683	763.091	451.43	0.759096	1.41e-06	2.82e-05	LIMK1	7	74082933	74122525	+	6902	protein_coding	LIM domain kinase 1 [Source:HGNC Symbol;Acc:HGNC:6613]	-
ENSG00000116212	1064.87	663.173	0.683211	1.42e-06	2.85e-05	LRRC42	1	53946077	53968168	+	2411	protein_coding	leucine rich repeat containing 42 [Source:HGNC Symbol;Acc:HGNC:28792]	-
ENSG00000137817	703.575	423.458	0.731756	1.44e-06	2.87e-05	PARP6	15	72241181	72272999	-	7696	protein_coding	poly(ADP-ribose) polymerase family member 6 [Source:HGNC Symbol;Acc:HGNC:26921]	-
ENSG00000143799	2867.4	5761.42	-1.00735	1.44e-06	2.88e-05	PARP1	1	226360691	226408079	-	7169	protein_coding	poly(ADP-ribose) polymerase 1 [Source:HGNC Symbol;Acc:HGNC:270]	Others
ENSG00000143862	464.213	265.369	0.805511	1.45e-06	2.89e-05	ARL8A	1	202133404	202144743	-	1975	protein_coding	ADP ribosylation factor like GTPase 8A [Source:HGNC Symbol;Acc:HGNC:25192]	-
ENSG00000102996	131.123	273.548	-1.06759	1.45e-06	2.9e-05	MMP15	16	58025566	58046901	+	4419	protein_coding	matrix metallopeptidase 15 [Source:HGNC Symbol;Acc:HGNC:7161]	-
ENSG00000165795	359.103	527.33	-0.557134	1.46e-06	2.91e-05	NDRG2	14	21016763	21070872	-	7550	protein_coding	NDRG family member 2 [Source:HGNC Symbol;Acc:HGNC:14460]	-
ENSG00000101144	802.09	1173.45	-0.550215	1.47e-06	2.92e-05	BMP7	20	57168748	57266629	-	5418	protein_coding	bone morphogenetic protein 7 [Source:HGNC Symbol;Acc:HGNC:1074]	-
ENSG00000136942	17606.3	9062.02	0.958169	1.49e-06	2.96e-05	RPL35	9	124857880	124861981	-	1535	protein_coding	ribosomal protein L35 [Source:HGNC Symbol;Acc:HGNC:10344]	-
ENSG00000185127	121.624	213.665	-0.810345	1.5e-06	2.98e-05	C6orf120	6	169702190	169704856	+	2667	protein_coding	chromosome 6 open reading frame 120 [Source:HGNC Symbol;Acc:HGNC:21247]	-
ENSG00000164850	122.485	203.512	-0.727539	1.53e-06	3.03e-05	GPER1	7	1082208	1093815	+	3149	protein_coding	G protein-coupled estrogen receptor 1 [Source:HGNC Symbol;Acc:HGNC:4485]	-
ENSG00000224660	37.2758	101.542	-1.43797	1.55e-06	3.08e-05	SH3BP5-AS1	3	15254184	15264493	+	5733	antisense	SH3BP5 antisense RNA 1 [Source:HGNC Symbol;Acc:HGNC:44501]	-
ENSG00000266651	10.5121	46.7545	-2.21857	1.56e-06	3.08e-05	AC093484.4	17	16440479	16440952	-	304	lincRNA	novel transcript	-
ENSG00000248445	3.46654	25.7881	-2.77897	1.56e-06	3.08e-05	SEMA6A-AS1	5	116447547	116508276	+	2829	antisense	SEMA6A antisense RNA 1 [Source:HGNC Symbol;Acc:HGNC:51110]	-
ENSG00000130227	1173.8	1946.14	-0.730416	1.6e-06	3.16e-05	XPO7	8	21919671	22006585	+	6909	protein_coding	exportin 7 [Source:HGNC Symbol;Acc:HGNC:14108]	-
ENSG00000280206	79.5225	33.8435	1.24311	1.61e-06	3.19e-05	AC026401.3	16	15701237	15702118	+	882	lincRNA	novel transcript	-
ENSG00000233527	77.9867	32.5072	1.25637	1.65e-06	3.26e-05	ZNF529-AS1	19	36573070	36594708	+	1868	antisense	ZNF529 antisense RNA 1 [Source:HGNC Symbol;Acc:HGNC:51275]	-
ENSG00000138160	507.337	1336.76	-1.39504	1.67e-06	3.3e-05	KIF11	10	92593286	92655395	+	4860	protein_coding	kinesin family member 11 [Source:HGNC Symbol;Acc:HGNC:6388]	-
ENSG00000152977	379.389	578.639	-0.607165	1.68e-06	3.31e-05	ZIC1	3	147393422	147510293	+	6806	protein_coding	Zic family member 1 [Source:HGNC Symbol;Acc:HGNC:12872]	zf-C2H2
ENSG00000243753	100.195	23.3716	2.10847	1.69e-06	3.33e-05	HLA-L	6	30259584	30293014	+	5505	transcribed_unprocessed_pseudogene	major histocompatibility complex, class I, L (pseudogene) [Source:HGNC Symbol;Acc:HGNC:4970]	-
ENSG00000196305	3114.55	4549.32	-0.546108	1.7e-06	3.33e-05	IARS	9	92210207	92293756	-	7401	protein_coding	isoleucyl-tRNA synthetase [Source:HGNC Symbol;Acc:HGNC:5330]	-
ENSG00000102226	1321.11	981.399	0.428257	1.72e-06	3.37e-05	USP11	X	47232690	47248328	+	5269	protein_coding	ubiquitin specific peptidase 11 [Source:HGNC Symbol;Acc:HGNC:12609]	-
ENSG00000113161	969.678	1948.24	-1.00491	1.74e-06	3.42e-05	HMGCR	5	75336329	75362104	+	6215	protein_coding	3-hydroxy-3-methylglutaryl-CoA reductase [Source:HGNC Symbol;Acc:HGNC:5006]	-
ENSG00000160097	1246.05	2752.51	-1.1447	1.75e-06	3.42e-05	FNDC5	1	32862268	32872482	-	3139	protein_coding	fibronectin type III domain containing 5 [Source:HGNC Symbol;Acc:HGNC:20240]	-
ENSG00000177614	333.804	696.028	-1.06531	1.75e-06	3.43e-05	PGBD5	1	230314482	230426371	-	11304	protein_coding	piggyBac transposable element derived 5 [Source:HGNC Symbol;Acc:HGNC:19405]	-
ENSG00000146067	567.479	319.055	0.83107	1.76e-06	3.44e-05	FAM193B	5	177519788	177554541	-	5804	protein_coding	family with sequence similarity 193 member B [Source:HGNC Symbol;Acc:HGNC:25524]	-
ENSG00000153989	692.599	977.422	-0.499512	1.77e-06	3.47e-05	NUS1	6	117675502	117710640	+	4676	protein_coding	NUS1, dehydrodolichyl diphosphate synthase subunit [Source:HGNC Symbol;Acc:HGNC:21042]	-
ENSG00000284606	26.0225	69.7571	-1.40787	1.78e-06	3.48e-05	AC105233.5	8	8059572	8199973	+	7317	processed_transcript	novel transcript	-
ENSG00000256915	55.3885	17.9599	1.64332	1.8e-06	3.5e-05	AC090023.2	12	65644334	65663299	+	701	lincRNA	novel transcript	-
ENSG00000277156	37.2944	89.162	-1.24344	1.83e-06	3.57e-05	AL589743.5	14	19267115	19268164	+	1050	processed_pseudogene	translocase of outer mitochondrial membrane 40 homolog (yeast) (TOMM40) pseudogene	-
ENSG00000171815	1.94186	20.1152	-3.38029	1.84e-06	3.58e-05	PCDHB1	5	141051135	141059344	+	8210	protein_coding	protocadherin beta 1 [Source:HGNC Symbol;Acc:HGNC:8680]	-
ENSG00000086200	296.449	481.701	-0.701755	1.87e-06	3.64e-05	IPO11	5	62403972	62628582	+	7540	protein_coding	importin 11 [Source:HGNC Symbol;Acc:HGNC:20628]	-
ENSG00000149150	255.074	150.042	0.769061	1.89e-06	3.68e-05	SLC43A1	11	57484534	57515786	-	3532	protein_coding	solute carrier family 43 member 1 [Source:HGNC Symbol;Acc:HGNC:9225]	-
ENSG00000178026	168.097	75.7412	1.15803	1.91e-06	3.7e-05	LRRC75B	22	24585620	24593208	-	3422	protein_coding	leucine rich repeat containing 75B [Source:HGNC Symbol;Acc:HGNC:33155]	-
ENSG00000173846	229.664	103.938	1.13719	1.93e-06	3.74e-05	PLK3	1	44800225	44805990	+	3479	protein_coding	polo like kinase 3 [Source:HGNC Symbol;Acc:HGNC:2154]	-
ENSG00000231345	42.2037	108.545	-1.37324	1.93e-06	3.75e-05	BEND3P1	10	50655967	50660472	+	2966	transcribed_processed_pseudogene	BEN domain containing 3 pseudogene 1 [Source:HGNC Symbol;Acc:HGNC:45014]	-
ENSG00000115902	326.574	603.878	-0.89083	1.94e-06	3.75e-05	SLC1A4	2	64988477	65023865	+	6939	protein_coding	solute carrier family 1 member 4 [Source:HGNC Symbol;Acc:HGNC:10942]	-
ENSG00000167842	431.558	780.202	-0.858376	1.95e-06	3.77e-05	MIS12	17	5486285	5490814	+	3157	protein_coding	MIS12, kinetochore complex component [Source:HGNC Symbol;Acc:HGNC:24967]	-
ENSG00000010072	169.698	313.047	-0.879916	1.95e-06	3.77e-05	SPRTN	1	231337104	231355023	+	5906	protein_coding	SprT-like N-terminal domain [Source:HGNC Symbol;Acc:HGNC:25356]	-
ENSG00000108932	42.0004	11.2999	1.91664	1.96e-06	3.77e-05	SLC16A6	17	68267026	68291267	-	4061	protein_coding	solute carrier family 16 member 6 [Source:HGNC Symbol;Acc:HGNC:10927]	-
ENSG00000261167	1.44932	18.8132	-3.53282	1.96e-06	3.77e-05	AC107027.3	3	131455126	131458598	-	3473	sense_overlapping	novel transcript, overlapping to MRPL3	-
ENSG00000280239	12.6283	47.5729	-1.96429	1.96e-06	3.77e-05	AC011498.7	19	4448810	4450836	+	2027	TEC	TEC	-
ENSG00000135334	977.467	621.325	0.652624	1.96e-06	3.77e-05	AKIRIN2	6	87675072	87702209	-	1999	protein_coding	akirin 2 [Source:HGNC Symbol;Acc:HGNC:21407]	-
ENSG00000175066	109.921	218.82	-0.980097	1.96e-06	3.77e-05	GK5	3	142157527	142225607	-	12158	protein_coding	glycerol kinase 5 [Source:HGNC Symbol;Acc:HGNC:28635]	-
ENSG00000106638	836.405	521.578	0.679848	1.96e-06	3.77e-05	TBL2	7	73567533	73578791	-	6466	protein_coding	transducin beta like 2 [Source:HGNC Symbol;Acc:HGNC:11586]	-
ENSG00000256053	384.349	141.59	1.4366	1.99e-06	3.83e-05	APOPT1	14	103562962	103607523	+	3932	protein_coding	apoptogenic 1, mitochondrial [Source:HGNC Symbol;Acc:HGNC:20492]	-
ENSG00000119042	364.944	232.434	0.655403	2e-06	3.83e-05	SATB2	2	199269500	199471266	-	10958	protein_coding	SATB homeobox 2 [Source:HGNC Symbol;Acc:HGNC:21637]	CUT
ENSG00000011638	233.09	119.875	0.953891	2.04e-06	3.91e-05	TMEM159	16	21158377	21180616	+	2558	protein_coding	transmembrane protein 159 [Source:HGNC Symbol;Acc:HGNC:30136]	-
ENSG00000171680	470.206	235.566	0.999082	2.05e-06	3.92e-05	PLEKHG5	1	6466092	6520061	-	7053	protein_coding	pleckstrin homology and RhoGEF domain containing G5 [Source:HGNC Symbol;Acc:HGNC:29105]	-
ENSG00000196754	1017.2	488.094	1.05762	2.05e-06	3.92e-05	S100A2	1	153561108	153567890	-	1567	protein_coding	S100 calcium binding protein A2 [Source:HGNC Symbol;Acc:HGNC:10492]	-
ENSG00000133619	325.023	173.084	0.906672	2.1e-06	4.02e-05	KRBA1	7	149714781	149734575	+	5337	protein_coding	KRAB-A domain containing 1 [Source:HGNC Symbol;Acc:HGNC:22228]	-
ENSG00000169679	1061.87	2009.99	-0.919189	2.11e-06	4.03e-05	BUB1	2	110637698	110678114	-	6032	protein_coding	BUB1 mitotic checkpoint serine/threonine kinase [Source:HGNC Symbol;Acc:HGNC:1148]	-
ENSG00000101298	83.6238	196.383	-1.23018	2.11e-06	4.04e-05	SNPH	20	1266280	1309328	+	5709	protein_coding	syntaphilin [Source:HGNC Symbol;Acc:HGNC:15931]	-
ENSG00000090020	588.317	278.549	1.08117	2.12e-06	4.05e-05	SLC9A1	1	27098815	27166981	-	5974	protein_coding	solute carrier family 9 member A1 [Source:HGNC Symbol;Acc:HGNC:11071]	-
ENSG00000179820	786.602	454.74	0.792252	2.14e-06	4.07e-05	MYADM	19	53866223	53876437	+	3675	protein_coding	myeloid associated differentiation marker [Source:HGNC Symbol;Acc:HGNC:7544]	-
ENSG00000171817	34.866	9.34039	1.89144	2.14e-06	4.07e-05	ZNF540	19	37551406	37614097	+	4304	protein_coding	zinc finger protein 540 [Source:HGNC Symbol;Acc:HGNC:25331]	zf-C2H2
ENSG00000101161	3089.24	2001.46	0.625411	2.15e-06	4.08e-05	PRPF6	20	63981135	64033100	+	3044	protein_coding	pre-mRNA processing factor 6 [Source:HGNC Symbol;Acc:HGNC:15860]	-
ENSG00000214389	119.557	66.6581	0.840125	2.15e-06	4.09e-05	RPS3AP26	7	98385801	98386584	-	784	processed_pseudogene	ribosomal protein S3a pseudogene 26 [Source:HGNC Symbol;Acc:HGNC:36513]	-
ENSG00000176593	146.115	369.899	-1.34812	2.17e-06	4.12e-05	AC008969.1	19	58002061	58011232	+	8787	processed_transcript	uncharacterized LOC100128398 [Source:NCBI gene;Acc:100128398]	-
ENSG00000144120	128.604	283.554	-1.15096	2.19e-06	4.16e-05	TMEM177	2	119679167	119686507	+	2588	protein_coding	transmembrane protein 177 [Source:HGNC Symbol;Acc:HGNC:28143]	-
ENSG00000110881	232.698	417.971	-0.838363	2.2e-06	4.17e-05	ASIC1	12	50057548	50083611	+	5745	protein_coding	acid sensing ion channel subunit 1 [Source:HGNC Symbol;Acc:HGNC:100]	-
ENSG00000140750	874.024	529.319	0.721258	2.25e-06	4.27e-05	ARHGAP17	16	24919385	25015666	-	9879	protein_coding	Rho GTPase activating protein 17 [Source:HGNC Symbol;Acc:HGNC:18239]	-
ENSG00000105856	498.644	235.443	1.08606	2.31e-06	4.37e-05	HBP1	7	107168961	107202529	+	6351	protein_coding	HMG-box transcription factor 1 [Source:HGNC Symbol;Acc:HGNC:23200]	HMG
ENSG00000130590	92.3384	46.1956	0.997315	2.31e-06	4.37e-05	SAMD10	20	63974113	63980008	-	2453	protein_coding	sterile alpha motif domain containing 10 [Source:HGNC Symbol;Acc:HGNC:16129]	-
ENSG00000101868	385.036	696.872	-0.852582	2.32e-06	4.39e-05	POLA1	X	24693919	24996986	+	6336	protein_coding	DNA polymerase alpha 1, catalytic subunit [Source:HGNC Symbol;Acc:HGNC:9173]	-
ENSG00000159208	342.021	70.6485	2.27776	2.32e-06	4.39e-05	CIART	1	150282543	150287093	+	2696	protein_coding	circadian associated repressor of transcription [Source:HGNC Symbol;Acc:HGNC:25200]	-
ENSG00000269821	85.6598	204.884	-1.24441	2.34e-06	4.4e-05	KCNQ1OT1	11	2608328	2699994	-	91667	antisense	KCNQ1 opposite strand/antisense transcript 1 [Source:HGNC Symbol;Acc:HGNC:6295]	-
ENSG00000161016	29932.9	15950	0.90812	2.36e-06	4.45e-05	RPL8	8	144789765	144792587	-	2159	protein_coding	ribosomal protein L8 [Source:HGNC Symbol;Acc:HGNC:10368]	-
ENSG00000131015	260.004	121.286	1.10651	2.38e-06	4.48e-05	ULBP2	6	149942000	149949235	+	1349	protein_coding	UL16 binding protein 2 [Source:HGNC Symbol;Acc:HGNC:14894]	-
ENSG00000128274	178.272	91.9748	0.957747	2.39e-06	4.5e-05	A4GALT	22	42692112	42721298	-	3407	protein_coding	alpha 1,4-galactosyltransferase (P blood group) [Source:HGNC Symbol;Acc:HGNC:18149]	-
ENSG00000188026	202.944	105.111	0.954353	2.4e-06	4.51e-05	RILPL1	12	123470054	123533718	-	8670	protein_coding	Rab interacting lysosomal protein like 1 [Source:HGNC Symbol;Acc:HGNC:26814]	-
ENSG00000198408	2194.09	1186.85	0.887376	2.44e-06	4.58e-05	OGA	10	101784443	101818465	-	7247	protein_coding	O-GlcNAcase [Source:HGNC Symbol;Acc:HGNC:7056]	-
ENSG00000163435	29.6687	1.76631	4.03381	2.44e-06	4.58e-05	ELF3	1	202007945	202017188	+	7191	protein_coding	E74 like ETS transcription factor 3 [Source:HGNC Symbol;Acc:HGNC:3318]	ETS
ENSG00000207547	0.959281	20.6915	-4.25773	2.45e-06	4.59e-05	MIR25	7	100093560	100093643	-	84	miRNA	microRNA 25 [Source:HGNC Symbol;Acc:HGNC:31609]	-
ENSG00000130827	564.31	296.693	0.929322	2.45e-06	4.59e-05	PLXNA3	X	154458281	154477779	+	11710	protein_coding	plexin A3 [Source:HGNC Symbol;Acc:HGNC:9101]	-
ENSG00000103264	569.793	277.192	1.03691	2.47e-06	4.62e-05	FBXO31	16	87326987	87392142	-	6897	protein_coding	F-box protein 31 [Source:HGNC Symbol;Acc:HGNC:16510]	-
ENSG00000176124	55.1572	115.812	-1.08699	2.53e-06	4.73e-05	DLEU1	13	50082171	50723236	+	12394	processed_transcript	deleted in lymphocytic leukemia 1 [Source:HGNC Symbol;Acc:HGNC:13747]	-
ENSG00000101574	99.289	215.204	-1.10487	2.53e-06	4.73e-05	METTL4	18	2537525	2571509	-	5724	protein_coding	methyltransferase like 4 [Source:HGNC Symbol;Acc:HGNC:24726]	-
ENSG00000183798	140.879	422.667	-1.59353	2.55e-06	4.76e-05	EMILIN3	20	41359966	41366827	-	3796	protein_coding	elastin microfibril interfacer 3 [Source:HGNC Symbol;Acc:HGNC:16123]	-
ENSG00000112511	431.593	260.722	0.726411	2.55e-06	4.76e-05	PHF1	6	33410399	33416453	+	3596	protein_coding	PHD finger protein 1 [Source:HGNC Symbol;Acc:HGNC:8919]	-
ENSG00000102934	54.4027	106.31	-0.958025	2.56e-06	4.76e-05	PLLP	16	57248547	57284687	-	8720	protein_coding	plasmolipin [Source:HGNC Symbol;Acc:HGNC:18553]	-
ENSG00000181004	63.9588	21.3753	1.59886	2.56e-06	4.77e-05	BBS12	4	122732702	122744943	+	3432	protein_coding	Bardet-Biedl syndrome 12 [Source:HGNC Symbol;Acc:HGNC:26648]	-
ENSG00000144559	446.063	277.954	0.679258	2.57e-06	4.78e-05	TAMM41	3	11790442	11846919	-	5925	protein_coding	TAM41 mitochondrial translocator assembly and maintenance homolog [Source:HGNC Symbol;Acc:HGNC:25187]	-
ENSG00000049249	63.1407	4.67726	3.75182	2.6e-06	4.84e-05	TNFRSF9	1	7915894	7943165	-	6331	protein_coding	TNF receptor superfamily member 9 [Source:HGNC Symbol;Acc:HGNC:11924]	-
ENSG00000158480	355.304	139.935	1.34031	2.61e-06	4.85e-05	SPATA2	20	49903391	49915508	-	4270	protein_coding	spermatogenesis associated 2 [Source:HGNC Symbol;Acc:HGNC:14681]	-
ENSG00000106245	736.307	437.249	0.753721	2.71e-06	5.02e-05	BUD31	7	99408641	99419616	+	2374	protein_coding	BUD31 homolog [Source:HGNC Symbol;Acc:HGNC:29629]	-
ENSG00000214106	8.53325	41.7682	-2.2397	2.71e-06	5.02e-05	PAXIP1-AS2	7	154928485	154952188	+	7553	antisense	PAXIP1 antisense RNA 2 [Source:HGNC Symbol;Acc:HGNC:48958]	-
ENSG00000205978	317.669	518.107	-0.708293	2.71e-06	5.02e-05	NYNRIN	14	24398786	24419288	+	7955	protein_coding	NYN domain and retroviral integrase containing [Source:HGNC Symbol;Acc:HGNC:20165]	-
ENSG00000083099	291.508	474.848	-0.706839	2.73e-06	5.06e-05	LYRM2	6	89568144	89638753	-	8679	protein_coding	LYR motif containing 2 [Source:HGNC Symbol;Acc:HGNC:25229]	-
ENSG00000214402	7.40571	58.9286	-2.94627	2.74e-06	5.06e-05	LCNL1	9	136981904	136986410	+	4052	protein_coding	lipocalin like 1 [Source:HGNC Symbol;Acc:HGNC:34436]	-
ENSG00000183092	194.327	92.7122	1.07239	2.74e-06	5.07e-05	BEGAIN	14	100537147	100587413	-	7878	protein_coding	brain enriched guanylate kinase associated [Source:HGNC Symbol;Acc:HGNC:24163]	-
ENSG00000159166	17.2238	57.1733	-1.78392	2.78e-06	5.12e-05	LAD1	1	201373244	201399915	-	3482	protein_coding	ladinin 1 [Source:HGNC Symbol;Acc:HGNC:6472]	-
ENSG00000115414	682.972	413.316	0.725367	2.79e-06	5.15e-05	FN1	2	215360440	215436172	-	17315	protein_coding	fibronectin 1 [Source:HGNC Symbol;Acc:HGNC:3778]	-
ENSG00000180834	46.1511	14.4675	1.68506	2.82e-06	5.19e-05	MAP6D1	3	183815876	183825594	-	2408	protein_coding	MAP6 domain containing 1 [Source:HGNC Symbol;Acc:HGNC:25753]	-
ENSG00000104419	5862.52	233.984	4.64704	2.82e-06	5.19e-05	NDRG1	8	133237171	133302022	-	9823	protein_coding	N-myc downstream regulated 1 [Source:HGNC Symbol;Acc:HGNC:7679]	-
ENSG00000034152	690.907	375.75	0.87699	2.82e-06	5.19e-05	MAP2K3	17	21284672	21315240	+	3783	protein_coding	mitogen-activated protein kinase kinase 3 [Source:HGNC Symbol;Acc:HGNC:6843]	-
ENSG00000240053	7.29949	28.9743	-1.96583	2.85e-06	5.24e-05	LY6G5B	6	31670167	31673776	+	3031	protein_coding	lymphocyte antigen 6 family member G5B [Source:HGNC Symbol;Acc:HGNC:13931]	-
ENSG00000121775	415.979	231.598	0.841749	2.87e-06	5.27e-05	TMEM39B	1	32072031	32102866	+	2820	protein_coding	transmembrane protein 39B [Source:HGNC Symbol;Acc:HGNC:25510]	-
ENSG00000198663	458.201	698.498	-0.610196	2.87e-06	5.27e-05	C6orf89	6	36871870	36928964	+	7340	protein_coding	chromosome 6 open reading frame 89 [Source:HGNC Symbol;Acc:HGNC:21114]	-
ENSG00000162909	2560.01	1622.73	0.658483	2.88e-06	5.27e-05	CAPN2	1	223701593	223776018	+	8792	protein_coding	calpain 2 [Source:HGNC Symbol;Acc:HGNC:1479]	-
ENSG00000172081	216.741	131.088	0.729166	2.88e-06	5.27e-05	MOB3A	19	2071038	2096673	-	4149	protein_coding	MOB kinase activator 3A [Source:HGNC Symbol;Acc:HGNC:29802]	-
ENSG00000156603	364.576	216.945	0.745877	2.89e-06	5.28e-05	MED19	11	57703714	57712323	-	1877	protein_coding	mediator complex subunit 19 [Source:HGNC Symbol;Acc:HGNC:29600]	-
ENSG00000217801	307.865	66.8464	2.20664	2.92e-06	5.34e-05	AL390719.1	1	1059734	1069355	+	2171	transcribed_unprocessed_pseudogene	uncharacterized LOC100288175 [Source:NCBI gene;Acc:100288175]	-
ENSG00000175155	127.254	32.2552	1.9875	2.93e-06	5.34e-05	YPEL2	17	59331689	59401729	+	8667	protein_coding	yippee like 2 [Source:HGNC Symbol;Acc:HGNC:18326]	-
ENSG00000173281	381.701	120.568	1.66567	2.96e-06	5.4e-05	PPP1R3B	8	9136255	9151574	-	5776	protein_coding	protein phosphatase 1 regulatory subunit 3B [Source:HGNC Symbol;Acc:HGNC:14942]	-
ENSG00000168621	30.7785	8.20504	1.87811	2.97e-06	5.41e-05	GDNF	5	37812677	37839686	-	4273	protein_coding	glial cell derived neurotrophic factor [Source:HGNC Symbol;Acc:HGNC:4232]	-
ENSG00000168917	250.538	148.173	0.759215	2.99e-06	5.45e-05	SLC35G2	3	136818647	136855892	+	4287	protein_coding	solute carrier family 35 member G2 [Source:HGNC Symbol;Acc:HGNC:28480]	-
ENSG00000280120	24.3709	83.9656	-1.74952	3.01e-06	5.49e-05	AC073857.1	12	123152324	123153377	-	1054	TEC	novel transcript	-
ENSG00000268916	305.575	173.977	0.811369	3.04e-06	5.54e-05	CSAG3	X	152753921	152760222	+	1083	protein_coding	CSAG family member 3 [Source:HGNC Symbol;Acc:HGNC:26237]	-
ENSG00000149809	107.593	191.64	-0.838525	3.06e-06	5.56e-05	TM7SF2	11	65111845	65116384	+	3408	protein_coding	transmembrane 7 superfamily member 2 [Source:HGNC Symbol;Acc:HGNC:11863]	-
ENSG00000139832	188.868	48.756	1.95745	3.07e-06	5.57e-05	RAB20	13	110523066	110561733	-	1518	protein_coding	RAB20, member RAS oncogene family [Source:HGNC Symbol;Acc:HGNC:18260]	-
ENSG00000213801	7.45631	30.9868	-2.09545	3.12e-06	5.66e-05	ZNF321P	19	52927135	52942601	-	2341	transcribed_processed_pseudogene	zinc finger protein 321, pseudogene [Source:HGNC Symbol;Acc:HGNC:13827]	-
ENSG00000177932	371.941	728.831	-0.966106	3.17e-06	5.74e-05	ZNF354C	5	179060415	179083537	+	5411	protein_coding	zinc finger protein 354C [Source:HGNC Symbol;Acc:HGNC:16736]	zf-C2H2
ENSG00000131196	309.594	186.793	0.724465	3.17e-06	5.74e-05	NFATC1	18	79395856	79529325	+	9068	protein_coding	nuclear factor of activated T cells 1 [Source:HGNC Symbol;Acc:HGNC:7775]	RHD
ENSG00000205208	279.128	725.626	-1.37341	3.19e-06	5.77e-05	C4orf46	4	158666679	158672255	-	3730	protein_coding	chromosome 4 open reading frame 46 [Source:HGNC Symbol;Acc:HGNC:27320]	-
ENSG00000088451	141.627	68.806	1.04876	3.21e-06	5.8e-05	TGDS	13	94574051	94596257	-	2589	protein_coding	TDP-glucose 4,6-dehydratase [Source:HGNC Symbol;Acc:HGNC:20324]	-
ENSG00000283122	6.29559	32.7004	-2.32757	3.21e-06	5.8e-05	HYMAI	6	144004916	144008262	-	3347	sense_overlapping	hydatidiform mole associated and imprinted [Source:HGNC Symbol;Acc:HGNC:5326]	-
ENSG00000173114	69.2812	173.403	-1.31161	3.26e-06	5.89e-05	LRRN3	7	111091006	111125454	+	3875	protein_coding	leucine rich repeat neuronal 3 [Source:HGNC Symbol;Acc:HGNC:17200]	-
ENSG00000089234	896.693	525.874	0.769103	3.3e-06	5.94e-05	BRAP	12	111642146	111685986	-	4686	protein_coding	BRCA1 associated protein [Source:HGNC Symbol;Acc:HGNC:1099]	-
ENSG00000277224	25.6643	1.22871	4.3373	3.31e-06	5.97e-05	HIST1H2BF	6	26199520	26200715	+	1196	protein_coding	histone cluster 1 H2B family member f [Source:HGNC Symbol;Acc:HGNC:4752]	-
ENSG00000215424	25.4127	65.8459	-1.39844	3.33e-06	5.99e-05	MCM3AP-AS1	21	46229217	46259390	+	7605	antisense	MCM3AP antisense RNA 1 [Source:HGNC Symbol;Acc:HGNC:16417]	-
ENSG00000184226	119.847	219.597	-0.861919	3.35e-06	6.03e-05	PCDH9	13	66302834	67230445	-	30944	protein_coding	protocadherin 9 [Source:HGNC Symbol;Acc:HGNC:8661]	-
ENSG00000138744	182.506	314.453	-0.792783	3.36e-06	6.04e-05	NAAA	4	75913657	75941051	-	4459	protein_coding	N-acylethanolamine acid amidase [Source:HGNC Symbol;Acc:HGNC:736]	-
ENSG00000196220	66.0856	134.059	-1.01514	3.37e-06	6.06e-05	SRGAP3	3	8980591	9363053	-	18924	protein_coding	SLIT-ROBO Rho GTPase activating protein 3 [Source:HGNC Symbol;Acc:HGNC:19744]	-
ENSG00000279088	59.0945	146.614	-1.29528	3.4e-06	6.11e-05	AC022400.7	10	73742995	73744230	-	1236	TEC	TEC	-
ENSG00000198142	521.005	236.772	1.14108	3.42e-06	6.14e-05	SOWAHC	2	109614334	109618990	+	4657	protein_coding	sosondowah ankyrin repeat domain family member C [Source:HGNC Symbol;Acc:HGNC:26149]	-
ENSG00000124067	498.254	233.028	1.09309	3.5e-06	6.27e-05	SLC12A4	16	67943474	67969601	-	8298	protein_coding	solute carrier family 12 member 4 [Source:HGNC Symbol;Acc:HGNC:10913]	-
ENSG00000131374	230.624	439.995	-0.926653	3.51e-06	6.28e-05	TBC1D5	3	17157162	18444817	-	11269	protein_coding	TBC1 domain family member 5 [Source:HGNC Symbol;Acc:HGNC:19166]	-
ENSG00000164294	230.441	533.79	-1.20602	3.52e-06	6.29e-05	GPX8	5	55160118	55167071	+	3868	protein_coding	glutathione peroxidase 8 (putative) [Source:HGNC Symbol;Acc:HGNC:33100]	-
ENSG00000114757	0.239773	12.2884	-4.99754	3.53e-06	6.31e-05	PEX5L	3	179794958	180037053	-	10236	protein_coding	peroxisomal biogenesis factor 5 like [Source:HGNC Symbol;Acc:HGNC:30024]	-
ENSG00000076706	1008.18	1560.87	-0.632447	3.56e-06	6.35e-05	MCAM	11	119308529	119321521	-	7422	protein_coding	melanoma cell adhesion molecule [Source:HGNC Symbol;Acc:HGNC:6934]	-
ENSG00000277283	9.92186	36.9329	-1.92041	3.56e-06	6.35e-05	AC004812.2	12	120116907	120119000	+	2094	antisense	novel transcript, antisense to RAB35	-
ENSG00000168078	464.574	743.649	-0.674891	3.61e-06	6.43e-05	PBK	8	27809620	27838095	-	2165	protein_coding	PDZ binding kinase [Source:HGNC Symbol;Acc:HGNC:18282]	-
ENSG00000197568	58.6046	27.6422	1.09394	3.61e-06	6.43e-05	HHLA3	1	70354805	70385339	+	1222	protein_coding	HERV-H LTR-associating 3 [Source:HGNC Symbol;Acc:HGNC:4906]	-
ENSG00000128563	572.825	316.225	0.853653	3.63e-06	6.46e-05	PRKRIP1	7	102363872	102426676	+	3696	protein_coding	PRKR interacting protein 1 [Source:HGNC Symbol;Acc:HGNC:21894]	-
ENSG00000196453	427.801	166.296	1.35979	3.64e-06	6.47e-05	ZNF777	7	149431363	149461123	-	3233	protein_coding	zinc finger protein 777 [Source:HGNC Symbol;Acc:HGNC:22213]	zf-C2H2
ENSG00000175084	8013.62	6044.32	0.406815	3.64e-06	6.47e-05	DES	2	219418377	219426739	+	2464	protein_coding	desmin [Source:HGNC Symbol;Acc:HGNC:2770]	-
ENSG00000114956	1011.72	663.8	0.608652	3.65e-06	6.47e-05	DGUOK	2	73926826	73958961	+	1455	protein_coding	deoxyguanosine kinase [Source:HGNC Symbol;Acc:HGNC:2858]	-
ENSG00000278828	36.2201	11.9208	1.61694	3.72e-06	6.59e-05	HIST1H3H	6	27810064	27811300	+	1237	protein_coding	histone cluster 1 H3 family member h [Source:HGNC Symbol;Acc:HGNC:4775]	-
ENSG00000154447	169.336	99.2421	0.768749	3.79e-06	6.72e-05	SH3RF1	4	169094256	169271105	-	5624	protein_coding	SH3 domain containing ring finger 1 [Source:HGNC Symbol;Acc:HGNC:17650]	-
ENSG00000080802	209.751	122.9	0.77011	3.79e-06	6.72e-05	CNOT4	7	135361795	135510127	-	6999	protein_coding	CCR4-NOT transcription complex subunit 4 [Source:HGNC Symbol;Acc:HGNC:7880]	-
ENSG00000131747	1736.88	6069.08	-1.80435	3.8e-06	6.73e-05	TOP2A	17	40388516	40417950	-	6437	protein_coding	DNA topoisomerase II alpha [Source:HGNC Symbol;Acc:HGNC:11989]	-
ENSG00000134884	510.198	754.655	-0.563203	3.82e-06	6.75e-05	ARGLU1	13	106541673	106568164	-	5810	protein_coding	arginine and glutamate rich 1 [Source:HGNC Symbol;Acc:HGNC:25482]	-
ENSG00000100036	181.593	96.9162	0.905962	3.85e-06	6.8e-05	SLC35E4	22	30635652	30669016	+	5531	protein_coding	solute carrier family 35 member E4 [Source:HGNC Symbol;Acc:HGNC:17058]	-
ENSG00000125885	420.512	882.562	-1.06572	3.85e-06	6.8e-05	MCM8	20	5950652	5998977	+	7691	protein_coding	minichromosome maintenance 8 homologous recombination repair factor [Source:HGNC Symbol;Acc:HGNC:16147]	-
ENSG00000026025	11795.8	4608.9	1.3559	3.89e-06	6.86e-05	VIM	10	17228259	17237593	+	5158	protein_coding	vimentin [Source:HGNC Symbol;Acc:HGNC:12692]	-
ENSG00000279838	0.250073	13.5475	-5.13851	3.9e-06	6.87e-05	AL356273.3	1	185292384	185294372	-	1989	TEC	TEC	-
ENSG00000110492	3543.72	2224.01	0.671421	3.92e-06	6.9e-05	MDK	11	46380756	46383837	+	2196	protein_coding	midkine [Source:HGNC Symbol;Acc:HGNC:6972]	-
ENSG00000180747	139.574	49.828	1.47751	3.94e-06	6.93e-05	SMG1P3	16	21446683	21520444	-	7107	transcribed_unprocessed_pseudogene	SMG1 pseudogene 3 [Source:HGNC Symbol;Acc:HGNC:49860]	-
ENSG00000136100	652.755	1020.14	-0.645494	3.95e-06	6.94e-05	VPS36	13	52412602	52450628	-	7293	protein_coding	vacuolar protein sorting 36 homolog [Source:HGNC Symbol;Acc:HGNC:20312]	-
ENSG00000182393	17.1116	0.566981	4.97494	4.02e-06	7.06e-05	IFNL1	19	39296325	39298673	+	857	protein_coding	interferon lambda 1 [Source:HGNC Symbol;Acc:HGNC:18363]	-
ENSG00000150630	16.6522	0.749869	4.46377	4.04e-06	7.09e-05	VEGFC	4	176683538	176792727	-	2420	protein_coding	vascular endothelial growth factor C [Source:HGNC Symbol;Acc:HGNC:12682]	-
ENSG00000063169	418.066	168.257	1.30965	4.06e-06	7.12e-05	BICRA	19	47608196	47703277	+	7507	protein_coding	BRD4 interacting chromatin remodeling complex associated protein [Source:HGNC Symbol;Acc:HGNC:4332]	-
ENSG00000169439	2955.94	4572.04	-0.628655	4.09e-06	7.16e-05	SDC2	8	96493351	96611780	+	4536	protein_coding	syndecan 2 [Source:HGNC Symbol;Acc:HGNC:10659]	-
ENSG00000197594	52.3942	110.039	-1.07604	4.13e-06	7.24e-05	ENPP1	6	131808016	131895155	+	9959	protein_coding	ectonucleotide pyrophosphatase/phosphodiesterase 1 [Source:HGNC Symbol;Acc:HGNC:3356]	-
ENSG00000134824	96.6767	192.553	-1.00075	4.16e-06	7.27e-05	FADS2	11	61792980	61867354	+	11026	protein_coding	fatty acid desaturase 2 [Source:HGNC Symbol;Acc:HGNC:3575]	-
ENSG00000184992	398.169	801.396	-1.01343	4.16e-06	7.27e-05	BRI3BP	12	124993700	125031231	+	6648	protein_coding	BRI3 binding protein [Source:HGNC Symbol;Acc:HGNC:14251]	-
ENSG00000134324	482.788	701.859	-0.536673	4.19e-06	7.32e-05	LPIN1	2	11677595	11827409	+	11861	protein_coding	lipin 1 [Source:HGNC Symbol;Acc:HGNC:13345]	-
ENSG00000196132	167.276	259.826	-0.629365	4.22e-06	7.36e-05	MYT1	20	64102394	64242253	+	6427	protein_coding	myelin transcription factor 1 [Source:HGNC Symbol;Acc:HGNC:7622]	zf-C2HC
ENSG00000149554	523.263	811.339	-0.631961	4.26e-06	7.42e-05	CHEK1	11	125625136	125676255	+	6558	protein_coding	checkpoint kinase 1 [Source:HGNC Symbol;Acc:HGNC:1925]	-
ENSG00000130584	459.587	282.714	0.699831	4.28e-06	7.46e-05	ZBTB46	20	63743666	63831244	-	6084	protein_coding	zinc finger and BTB domain containing 46 [Source:HGNC Symbol;Acc:HGNC:16094]	-
ENSG00000123395	349.759	190.996	0.867623	4.29e-06	7.48e-05	ATG101	12	52069246	52077494	+	3199	protein_coding	autophagy related 101 [Source:HGNC Symbol;Acc:HGNC:25679]	-
ENSG00000137807	436.007	804.065	-0.881107	4.31e-06	7.5e-05	KIF23	15	69414246	69448427	+	6576	protein_coding	kinesin family member 23 [Source:HGNC Symbol;Acc:HGNC:6392]	-
ENSG00000185278	171.168	302.956	-0.826873	4.44e-06	7.72e-05	ZBTB37	1	173868082	173903549	+	19464	protein_coding	zinc finger and BTB domain containing 37 [Source:HGNC Symbol;Acc:HGNC:28365]	ZBTB
ENSG00000164048	119.977	208.963	-0.790159	4.44e-06	7.72e-05	ZNF589	3	48241100	48299253	+	5521	protein_coding	zinc finger protein 589 [Source:HGNC Symbol;Acc:HGNC:16747]	zf-C2H2
ENSG00000184613	315.36	651.307	-1.04185	4.45e-06	7.72e-05	NELL2	12	44508275	44921848	-	6424	protein_coding	neural EGFL like 2 [Source:HGNC Symbol;Acc:HGNC:7751]	-
ENSG00000186376	43.4249	92.1167	-1.07224	4.47e-06	7.75e-05	ZNF75D	X	135248920	135344087	-	6819	protein_coding	zinc finger protein 75D [Source:HGNC Symbol;Acc:HGNC:13145]	zf-C2H2
ENSG00000142102	978.56	444.355	1.13947	4.48e-06	7.76e-05	PGGHG	11	289135	296107	+	5260	protein_coding	protein-glucosylgalactosylhydroxylysine glucosidase [Source:HGNC Symbol;Acc:HGNC:26210]	-
ENSG00000187837	584.042	199.555	1.5515	4.51e-06	7.8e-05	HIST1H1C	6	26055787	26056428	-	642	protein_coding	histone cluster 1 H1 family member c [Source:HGNC Symbol;Acc:HGNC:4716]	-
ENSG00000159840	1814	776.192	1.22377	4.51e-06	7.8e-05	ZYX	7	143381080	143391111	+	3482	protein_coding	zyxin [Source:HGNC Symbol;Acc:HGNC:13200]	-
ENSG00000132825	89.8593	182.354	-1.00535	4.51e-06	7.8e-05	PPP1R3D	20	59936668	59940297	-	3630	protein_coding	protein phosphatase 1 regulatory subunit 3D [Source:HGNC Symbol;Acc:HGNC:9294]	-
ENSG00000034510	16567.5	6145.3	1.43085	4.54e-06	7.85e-05	TMSB10	2	84905625	84906675	+	496	protein_coding	thymosin beta 10 [Source:HGNC Symbol;Acc:HGNC:11879]	-
ENSG00000162813	410.813	570.59	-0.47143	4.59e-06	7.91e-05	BPNT1	1	220057482	220090462	-	3113	protein_coding	3'(2'), 5'-bisphosphate nucleotidase 1 [Source:HGNC Symbol;Acc:HGNC:1096]	-
ENSG00000076924	1407.83	742.353	0.922363	4.62e-06	7.97e-05	XAB2	19	7619525	7629565	-	4673	protein_coding	XPA binding protein 2 [Source:HGNC Symbol;Acc:HGNC:14089]	-
ENSG00000135679	330.78	654.542	-0.979726	4.63e-06	7.98e-05	MDM2	12	68808176	68850686	+	13284	protein_coding	MDM2 proto-oncogene [Source:HGNC Symbol;Acc:HGNC:6973]	-
ENSG00000261556	29.2672	71.7993	-1.29369	4.66e-06	8.02e-05	SMG1P7	16	70219574	70246610	-	4433	transcribed_unprocessed_pseudogene	SMG1 pseudogene 7 [Source:HGNC Symbol;Acc:HGNC:49864]	-
ENSG00000101557	924.441	1723.65	-0.896898	4.7e-06	8.09e-05	USP14	18	158383	214629	+	5987	protein_coding	ubiquitin specific peptidase 14 [Source:HGNC Symbol;Acc:HGNC:12612]	-
ENSG00000100316	29178.8	18900.4	0.626575	4.73e-06	8.13e-05	RPL3	22	39312882	39320389	-	4787	protein_coding	ribosomal protein L3 [Source:HGNC Symbol;Acc:HGNC:10332]	-
ENSG00000136997	4343.69	2046.71	1.0852	4.83e-06	8.3e-05	MYC	8	127735434	127741434	+	3001	protein_coding	MYC proto-oncogene, bHLH transcription factor [Source:HGNC Symbol;Acc:HGNC:7553]	bHLH
ENSG00000186298	2885.8	4726.98	-0.711458	4.9e-06	8.42e-05	PPP1CC	12	110719680	110742939	-	6906	protein_coding	protein phosphatase 1 catalytic subunit gamma [Source:HGNC Symbol;Acc:HGNC:9283]	-
ENSG00000185480	231.224	445.585	-0.947447	4.94e-06	8.46e-05	PARPBP	12	102120185	102197520	+	4745	protein_coding	PARP1 binding protein [Source:HGNC Symbol;Acc:HGNC:26074]	-
ENSG00000116005	340.328	870.453	-1.35098	4.94e-06	8.47e-05	PCYOX1	2	70257386	70281191	+	5870	protein_coding	prenylcysteine oxidase 1 [Source:HGNC Symbol;Acc:HGNC:20588]	-
ENSG00000271862	4.80853	25.8476	-2.39042	4.95e-06	8.47e-05	AC104118.1	5	83049376	83050964	-	1589	lincRNA	novel transcript	-
ENSG00000169246	77.4627	33.3916	1.21655	5e-06	8.56e-05	NPIPB3	16	21402237	21448567	-	4717	protein_coding	nuclear pore complex interacting protein family member B3 [Source:HGNC Symbol;Acc:HGNC:28989]	-
ENSG00000101290	425.866	622.216	-0.548343	5.03e-06	8.6e-05	CDS2	20	5126786	5197887	+	11893	protein_coding	CDP-diacylglycerol synthase 2 [Source:HGNC Symbol;Acc:HGNC:1801]	-
ENSG00000104341	3676.8	5839.57	-0.66687	5.04e-06	8.61e-05	LAPTM4B	8	97775057	97853013	+	3197	protein_coding	lysosomal protein transmembrane 4 beta [Source:HGNC Symbol;Acc:HGNC:13646]	-
ENSG00000141101	882.921	395.351	1.15736	5.07e-06	8.65e-05	NOB1	16	69741867	69754940	-	2119	protein_coding	NIN1 (RPN12) binding protein 1 homolog [Source:HGNC Symbol;Acc:HGNC:29540]	-
ENSG00000147912	195.894	306.505	-0.65194	5.08e-06	8.66e-05	FBXO10	9	37510892	37576349	-	5997	protein_coding	F-box protein 10 [Source:HGNC Symbol;Acc:HGNC:13589]	-
ENSG00000137812	121.823	420.275	-1.77777	5.09e-06	8.66e-05	KNL1	15	40594020	40664342	+	10250	protein_coding	kinetochore scaffold 1 [Source:HGNC Symbol;Acc:HGNC:24054]	-
ENSG00000120327	140.268	279.854	-0.986619	5.09e-06	8.66e-05	PCDHB14	5	141222932	141227759	+	4828	protein_coding	protocadherin beta 14 [Source:HGNC Symbol;Acc:HGNC:8685]	-
ENSG00000218891	438.948	159.362	1.45834	5.09e-06	8.66e-05	ZNF579	19	55576770	55580845	-	3321	protein_coding	zinc finger protein 579 [Source:HGNC Symbol;Acc:HGNC:26646]	zf-C2H2
ENSG00000075884	557.776	1052.42	-0.914173	5.13e-06	8.72e-05	ARHGAP15	2	143091362	143768352	+	6226	protein_coding	Rho GTPase activating protein 15 [Source:HGNC Symbol;Acc:HGNC:21030]	-
ENSG00000143420	1842.38	2645.27	-0.523145	5.15e-06	8.74e-05	ENSA	1	150600851	150629612	-	5493	protein_coding	endosulfine alpha [Source:HGNC Symbol;Acc:HGNC:3360]	-
ENSG00000124767	1684.72	3152.4	-0.903177	5.22e-06	8.86e-05	GLO1	6	38675925	38703141	-	2352	protein_coding	glyoxalase I [Source:HGNC Symbol;Acc:HGNC:4323]	-
ENSG00000178295	132.816	388.624	-1.54005	5.3e-06	8.99e-05	GEN1	2	17753858	17788941	+	11827	protein_coding	GEN1, Holliday junction 5' flap endonuclease [Source:HGNC Symbol;Acc:HGNC:26881]	-
ENSG00000138777	225.247	356.455	-0.662839	5.32e-06	9.01e-05	PPA2	4	105369077	105474081	-	4654	protein_coding	pyrophosphatase (inorganic) 2 [Source:HGNC Symbol;Acc:HGNC:28883]	-
ENSG00000103966	902.026	503.364	0.839444	5.47e-06	9.27e-05	EHD4	15	41895939	41972578	-	7879	protein_coding	EH domain containing 4 [Source:HGNC Symbol;Acc:HGNC:3245]	-
ENSG00000200534	5.78609	32.4173	-2.44225	5.5e-06	9.31e-05	SNORA33	6	132817219	132817348	+	130	snoRNA	small nucleolar RNA, H/ACA box 33 [Source:HGNC Symbol;Acc:HGNC:32623]	-
ENSG00000177613	396.641	688.056	-0.799335	5.51e-06	9.32e-05	CSTF2T	10	51695487	51699591	-	4105	protein_coding	cleavage stimulation factor subunit 2 tau variant [Source:HGNC Symbol;Acc:HGNC:17086]	-
ENSG00000116604	1202.74	639.111	0.910603	5.52e-06	9.32e-05	MEF2D	1	156463727	156500828	-	6400	protein_coding	myocyte enhancer factor 2D [Source:HGNC Symbol;Acc:HGNC:6997]	SRF
ENSG00000267565	5.26726	24.5868	-2.28403	5.56e-06	9.38e-05	AC011477.3	19	19892433	19895847	-	403	antisense	novel transcript, antisense to ZNF253	-
ENSG00000116954	327.778	171.356	0.940632	5.58e-06	9.41e-05	RRAGC	1	38838198	38859823	-	5167	protein_coding	Ras related GTP binding C [Source:HGNC Symbol;Acc:HGNC:19902]	-
ENSG00000176383	69.4297	28.8637	1.27882	5.65e-06	9.52e-05	B3GNT4	12	122203543	122208952	+	4690	protein_coding	UDP-GlcNAc:betaGal beta-1,3-N-acetylglucosaminyltransferase 4 [Source:HGNC Symbol;Acc:HGNC:15683]	-
ENSG00000281026	5.53564	39.7161	-2.76793	5.68e-06	9.57e-05	N4BP2L2-IT2	13	32504506	32509395	-	4890	sense_intronic	N4BPL2 intronic transcript 2 [Source:HGNC Symbol;Acc:HGNC:25038]	-
ENSG00000134107	5013.84	217.049	4.52985	5.73e-06	9.63e-05	BHLHE40	3	4979116	4985323	+	3837	protein_coding	basic helix-loop-helix family member e40 [Source:HGNC Symbol;Acc:HGNC:1046]	bHLH
ENSG00000277775	33.1683	1.99206	4.03425	5.75e-06	9.66e-05	HIST1H3F	6	26250195	26250605	-	411	protein_coding	histone cluster 1 H3 family member f [Source:HGNC Symbol;Acc:HGNC:4773]	-
ENSG00000007968	268.121	776.781	-1.53965	5.75e-06	9.67e-05	E2F2	1	23506430	23531220	-	5457	protein_coding	E2F transcription factor 2 [Source:HGNC Symbol;Acc:HGNC:3114]	E2F
ENSG00000120656	522.118	310.81	0.7521	5.78e-06	9.7e-05	TAF12	1	28589323	28643085	-	2337	protein_coding	TATA-box binding protein associated factor 12 [Source:HGNC Symbol;Acc:HGNC:11545]	-
ENSG00000142864	7398.86	9305.98	-0.330877	5.81e-06	9.75e-05	SERBP1	1	67407810	67430415	-	7676	protein_coding	SERPINE1 mRNA binding protein 1 [Source:HGNC Symbol;Acc:HGNC:17860]	-
ENSG00000179195	1576.87	2727.56	-0.789431	5.84e-06	9.79e-05	ZNF664	12	123971845	124015439	+	6340	protein_coding	zinc finger protein 664 [Source:HGNC Symbol;Acc:HGNC:25406]	zf-C2H2
ENSG00000248323	1252.54	178.561	2.81095	5.85e-06	9.8e-05	LUCAT1	5	91054834	91314547	-	16538	antisense	lung cancer associated transcript 1 [Source:HGNC Symbol;Acc:HGNC:48498]	-
ENSG00000053501	133.598	67.085	0.991632	5.89e-06	9.85e-05	USE1	19	17215346	17219829	+	2431	protein_coding	unconventional SNARE in the ER 1 [Source:HGNC Symbol;Acc:HGNC:30882]	-
ENSG00000132406	240.665	131.156	0.881482	5.9e-06	9.86e-05	TMEM128	4	4235542	4248212	-	1737	protein_coding	transmembrane protein 128 [Source:HGNC Symbol;Acc:HGNC:28201]	-
ENSG00000134668	106.161	18.88	2.49684	5.9e-06	9.86e-05	SPOCD1	1	31790422	31816051	-	7085	protein_coding	SPOC domain containing 1 [Source:HGNC Symbol;Acc:HGNC:26338]	-
ENSG00000105229	623.456	346.52	0.844476	5.91e-06	9.87e-05	PIAS4	19	4007646	4039386	+	3646	protein_coding	protein inhibitor of activated STAT 4 [Source:HGNC Symbol;Acc:HGNC:17002]	zf-MIZ
ENSG00000108523	1285.54	822.764	0.642204	5.98e-06	9.98e-05	RNF167	17	4940008	4945222	+	2744	protein_coding	ring finger protein 167 [Source:HGNC Symbol;Acc:HGNC:24544]	-
ENSG00000135776	178.827	283.537	-0.661454	6.04e-06	0.000100624	ABCB10	1	229516582	229558695	-	4256	protein_coding	ATP binding cassette subfamily B member 10 [Source:HGNC Symbol;Acc:HGNC:41]	-
ENSG00000165868	241.87	370.834	-0.612339	6.08e-06	0.000101207	HSPA12A	10	116671192	116850236	-	11834	protein_coding	heat shock protein family A (Hsp70) member 12A [Source:HGNC Symbol;Acc:HGNC:19022]	-
ENSG00000125378	144.435	71.9268	1.00374	6.11e-06	0.000101682	BMP4	14	53949736	53958761	-	3082	protein_coding	bone morphogenetic protein 4 [Source:HGNC Symbol;Acc:HGNC:1071]	-
ENSG00000196182	1263.96	628.091	1.0074	6.13e-06	0.000101915	STK40	1	36339624	36385896	-	5590	protein_coding	serine/threonine kinase 40 [Source:HGNC Symbol;Acc:HGNC:21373]	-
ENSG00000142082	173.882	108.457	0.685684	6.19e-06	0.000102879	SIRT3	11	215458	236931	-	5202	protein_coding	sirtuin 3 [Source:HGNC Symbol;Acc:HGNC:14931]	-
ENSG00000128266	240.84	358.316	-0.571414	6.3e-06	0.000104583	GNAZ	22	23070361	23125037	+	3840	protein_coding	G protein subunit alpha z [Source:HGNC Symbol;Acc:HGNC:4395]	-
ENSG00000102893	313.423	550.995	-0.81101	6.3e-06	0.000104583	PHKB	16	47461123	47701523	+	11822	protein_coding	phosphorylase kinase regulatory subunit beta [Source:HGNC Symbol;Acc:HGNC:8927]	-
ENSG00000285979	6.77783	27.3667	-1.99664	6.31e-06	0.000104626	AC009090.6	16	57177349	57181390	+	3524	antisense	novel transcript, antisense to FAM192A	-
ENSG00000102158	775.493	1186.85	-0.612083	6.36e-06	0.000105424	MAGT1	X	77826364	77895593	-	4862	protein_coding	magnesium transporter 1 [Source:HGNC Symbol;Acc:HGNC:28880]	-
ENSG00000115325	953.773	482.69	0.980609	6.42e-06	0.000106215	DOK1	2	74549026	74557554	+	3049	protein_coding	docking protein 1 [Source:HGNC Symbol;Acc:HGNC:2990]	-
ENSG00000183258	1525.37	612.118	1.31818	6.58e-06	0.000108881	DDX41	5	177511577	177517469	-	4536	protein_coding	DEAD-box helicase 41 [Source:HGNC Symbol;Acc:HGNC:18674]	-
ENSG00000176244	43.2995	119.014	-1.43268	6.61e-06	0.000109205	ACBD7	10	15077523	15088776	-	1498	protein_coding	acyl-CoA binding domain containing 7 [Source:HGNC Symbol;Acc:HGNC:17715]	-
ENSG00000206573	282.058	415.353	-0.554568	6.62e-06	0.000109286	THUMPD3-AS1	3	9349689	9398579	-	6275	antisense	THUMPD3 antisense RNA 1 [Source:HGNC Symbol;Acc:HGNC:44478]	-
ENSG00000100558	10.8612	0.889895	3.57072	6.63e-06	0.000109436	PLEK2	14	67386983	67412200	-	1603	protein_coding	pleckstrin 2 [Source:HGNC Symbol;Acc:HGNC:19238]	-
ENSG00000141524	585.194	300.961	0.960422	6.65e-06	0.00010964	TMC6	17	78110458	78132407	-	8669	protein_coding	transmembrane channel like 6 [Source:HGNC Symbol;Acc:HGNC:18021]	-
ENSG00000182208	330.512	174.66	0.915669	6.76e-06	0.000111374	MOB2	11	1469457	1501247	-	4512	protein_coding	MOB kinase activator 2 [Source:HGNC Symbol;Acc:HGNC:24904]	-
ENSG00000119715	44.9457	19.2858	1.20903	6.77e-06	0.000111435	ESRRB	14	76310712	76501837	+	5930	protein_coding	estrogen related receptor beta [Source:HGNC Symbol;Acc:HGNC:3473]	ESR-like
ENSG00000166263	138.054	288.739	-1.05639	6.83e-06	0.000112324	STXBP4	17	54968727	55173632	+	18055	protein_coding	syntaxin binding protein 4 [Source:HGNC Symbol;Acc:HGNC:19694]	-
ENSG00000099954	792.108	488.177	0.696962	6.95e-06	0.000114259	CECR2	22	17359949	17558149	+	10759	protein_coding	CECR2, histone acetyl-lysine reader [Source:HGNC Symbol;Acc:HGNC:1840]	-
ENSG00000137038	154.167	306.57	-0.995163	6.96e-06	0.000114259	DMAC1	9	7796490	7888380	-	3000	protein_coding	distal membrane arm assembly complex 1 [Source:HGNC Symbol;Acc:HGNC:30536]	-
ENSG00000164463	489.522	153.938	1.67157	6.96e-06	0.000114259	CREBRF	5	173056352	173139284	+	12333	protein_coding	CREB3 regulatory factor [Source:HGNC Symbol;Acc:HGNC:24050]	-
ENSG00000143013	584.86	916.028	-0.644075	7.08e-06	0.000116133	LMO4	1	87328468	87348923	+	5833	protein_coding	LIM domain only 4 [Source:HGNC Symbol;Acc:HGNC:6644]	-
ENSG00000144560	1060.35	526.767	1.01026	7.1e-06	0.000116327	VGLL4	3	11556070	11771350	-	7236	protein_coding	vestigial like family member 4 [Source:HGNC Symbol;Acc:HGNC:28966]	-
ENSG00000104856	497.068	78.4232	2.66207	7.12e-06	0.000116491	RELB	19	45001430	45038198	+	3035	protein_coding	RELB proto-oncogene, NF-kB subunit [Source:HGNC Symbol;Acc:HGNC:9956]	RHD
ENSG00000111110	270.524	664.514	-1.29158	7.12e-06	0.000116491	PPM1H	12	62643982	62935037	-	7063	protein_coding	protein phosphatase, Mg2+/Mn2+ dependent 1H [Source:HGNC Symbol;Acc:HGNC:18583]	-
ENSG00000171604	1295.51	914.328	0.504013	7.12e-06	0.000116491	CXXC5	5	139647299	139683882	+	3852	protein_coding	CXXC finger protein 5 [Source:HGNC Symbol;Acc:HGNC:26943]	-
ENSG00000130193	175.851	532.371	-1.60521	7.22e-06	0.000118017	THEM6	8	142727203	142736927	+	3055	protein_coding	thioesterase superfamily member 6 [Source:HGNC Symbol;Acc:HGNC:29656]	-
ENSG00000171503	125.462	238.303	-0.917214	7.24e-06	0.00011829	ETFDH	4	158672125	158709623	+	4493	protein_coding	electron transfer flavoprotein dehydrogenase [Source:HGNC Symbol;Acc:HGNC:3483]	-
ENSG00000147889	1846.77	1036.47	0.832217	7.4e-06	0.00012067	CDKN2A	9	21967753	21995301	-	4329	protein_coding	cyclin dependent kinase inhibitor 2A [Source:HGNC Symbol;Acc:HGNC:1787]	-
ENSG00000048052	55.2892	13.9219	1.97918	7.43e-06	0.000121124	HDAC9	7	18086949	19002416	+	16827	protein_coding	histone deacetylase 9 [Source:HGNC Symbol;Acc:HGNC:14065]	-
ENSG00000171522	14.7181	1.99448	2.87279	7.49e-06	0.000122097	PTGER4	5	40679498	40693735	+	3961	protein_coding	prostaglandin E receptor 4 [Source:HGNC Symbol;Acc:HGNC:9596]	-
ENSG00000125746	171.022	56.4082	1.60544	7.52e-06	0.000122448	EML2	19	45606994	45645629	-	8224	protein_coding	echinoderm microtubule associated protein like 2 [Source:HGNC Symbol;Acc:HGNC:18035]	-
ENSG00000120889	1427.92	939.355	0.603559	7.56e-06	0.000123026	TNFRSF10B	8	23020133	23069179	-	5158	protein_coding	TNF receptor superfamily member 10b [Source:HGNC Symbol;Acc:HGNC:11905]	-
ENSG00000213463	169.768	422.195	-1.30686	7.58e-06	0.000123256	SYNJ2BP	14	70366496	70417061	-	7031	protein_coding	synaptojanin 2 binding protein [Source:HGNC Symbol;Acc:HGNC:18955]	-
ENSG00000168779	174.376	93.0765	0.91341	7.66e-06	0.000124487	SHOX2	3	158095954	158106503	-	5045	protein_coding	short stature homeobox 2 [Source:HGNC Symbol;Acc:HGNC:10854]	Homeobox
ENSG00000012822	637.322	355.34	0.845194	7.75e-06	0.000125711	CALCOCO1	12	53708517	53727745	-	8898	protein_coding	calcium binding and coiled-coil domain 1 [Source:HGNC Symbol;Acc:HGNC:29306]	-
ENSG00000135931	288.089	166.224	0.79289	7.75e-06	0.000125711	ARMC9	2	231198546	231374837	+	9661	protein_coding	armadillo repeat containing 9 [Source:HGNC Symbol;Acc:HGNC:20730]	-
ENSG00000175322	59.0924	145.869	-1.29744	7.77e-06	0.000125909	ZNF519	18	14057457	14132490	-	15787	protein_coding	zinc finger protein 519 [Source:HGNC Symbol;Acc:HGNC:30574]	zf-C2H2
ENSG00000167555	270.659	414.431	-0.618752	7.86e-06	0.000127363	ZNF528	19	52397849	52418412	+	8530	protein_coding	zinc finger protein 528 [Source:HGNC Symbol;Acc:HGNC:29384]	zf-C2H2
ENSG00000269951	12.9874	40.2065	-1.59134	7.97e-06	0.000128991	AC090181.2	15	77067654	77068325	-	672	sense_intronic	novel transcript, sense intronic to TSPAN3	-
ENSG00000105619	275.308	141.314	0.956449	8e-06	0.000129387	TFPT	19	54107013	54115675	-	1240	protein_coding	TCF3 fusion partner [Source:HGNC Symbol;Acc:HGNC:13630]	-
ENSG00000181704	310.502	469.514	-0.594015	8.01e-06	0.000129414	YIPF6	X	68498323	68537285	+	8850	protein_coding	Yip1 domain family member 6 [Source:HGNC Symbol;Acc:HGNC:28304]	-
ENSG00000165548	350.43	576.254	-0.717492	8.05e-06	0.00012999	TMEM63C	14	77116568	77259495	+	6363	protein_coding	transmembrane protein 63C [Source:HGNC Symbol;Acc:HGNC:23787]	-
ENSG00000134470	60.6857	29.225	1.05432	8.08e-06	0.000130312	IL15RA	10	5943639	5978187	-	3634	protein_coding	interleukin 15 receptor subunit alpha [Source:HGNC Symbol;Acc:HGNC:5978]	-
ENSG00000251127	31.7777	8.69318	1.89825	8.08e-06	0.000130312	AC091173.1	8	61759094	61765969	-	2750	lincRNA	novel transcript	-
ENSG00000042493	76.4234	35.2527	1.12565	8.14e-06	0.000131188	CAPG	2	85394748	85418432	-	2607	protein_coding	capping actin protein, gelsolin like [Source:HGNC Symbol;Acc:HGNC:1474]	-
ENSG00000179148	39.1287	10.1355	1.96472	8.21e-06	0.000132073	ALOXE3	17	8095900	8119047	-	3760	protein_coding	arachidonate lipoxygenase 3 [Source:HGNC Symbol;Acc:HGNC:13743]	-
ENSG00000130513	1156.88	317.396	1.86674	8.21e-06	0.000132073	GDF15	19	18374731	18389176	+	2087	protein_coding	growth differentiation factor 15 [Source:HGNC Symbol;Acc:HGNC:30142]	-
ENSG00000198369	1914.82	1346.54	0.507711	8.33e-06	0.000133836	SPRED2	2	65310851	65432637	-	5154	protein_coding	sprouty related EVH1 domain containing 2 [Source:HGNC Symbol;Acc:HGNC:17722]	-
ENSG00000104324	229.332	368.87	-0.688855	8.34e-06	0.000133985	CPQ	8	96645227	97149654	+	3457	protein_coding	carboxypeptidase Q [Source:HGNC Symbol;Acc:HGNC:16910]	-
ENSG00000163449	37.5686	77.0671	-1.03057	8.38e-06	0.000134526	TMEM169	2	216081866	216102783	+	3628	protein_coding	transmembrane protein 169 [Source:HGNC Symbol;Acc:HGNC:25130]	-
ENSG00000142279	181.715	52.9607	1.77113	8.41e-06	0.000134926	WTIP	19	34481638	34512304	+	13733	protein_coding	WT1 interacting protein [Source:HGNC Symbol;Acc:HGNC:20964]	-
ENSG00000118473	40.6943	6.62404	2.63707	8.46e-06	0.000135529	SGIP1	1	66533383	66748299	+	10477	protein_coding	SH3 domain GRB2 like endophilin interacting protein 1 [Source:HGNC Symbol;Acc:HGNC:25412]	-
ENSG00000157600	192.191	352.082	-0.879605	8.49e-06	0.000135984	TMEM164	X	110002631	110182734	+	6583	protein_coding	transmembrane protein 164 [Source:HGNC Symbol;Acc:HGNC:26217]	-
ENSG00000196074	15.3017	82.1345	-2.38003	8.51e-06	0.00013621	SYCP2	20	59863563	59933655	-	6466	protein_coding	synaptonemal complex protein 2 [Source:HGNC Symbol;Acc:HGNC:11490]	-
ENSG00000198668	4112.13	6295.7	-0.614203	8.59e-06	0.000137291	CALM1	14	90396502	90408261	+	7705	protein_coding	calmodulin 1 [Source:HGNC Symbol;Acc:HGNC:1442]	-
ENSG00000158164	317.007	498.483	-0.651617	8.6e-06	0.000137431	TMSB15A	X	102513676	102516784	-	685	protein_coding	thymosin beta 15a [Source:HGNC Symbol;Acc:HGNC:30744]	-
ENSG00000072274	3463.94	6184.68	-0.8358	8.77e-06	0.000140082	TFRC	3	196027183	196082189	-	7887	protein_coding	transferrin receptor [Source:HGNC Symbol;Acc:HGNC:11763]	-
ENSG00000167772	2615.64	70.1527	5.22061	8.84e-06	0.000141068	ANGPTL4	19	8363289	8374373	+	2482	protein_coding	angiopoietin like 4 [Source:HGNC Symbol;Acc:HGNC:16039]	-
ENSG00000184545	372.012	194.081	0.934756	8.87e-06	0.000141485	DUSP8	11	1554044	1571920	-	4616	protein_coding	dual specificity phosphatase 8 [Source:HGNC Symbol;Acc:HGNC:3074]	-
ENSG00000267523	4.38406	24.2621	-2.46145	8.95e-06	0.00014247	AC008735.2	19	55661901	55674715	-	561	antisense	novel transcript, antisense to U2AF2A	-
ENSG00000136158	2143	1301.56	0.718484	8.95e-06	0.00014247	SPRY2	13	80335976	80340951	-	3038	protein_coding	sprouty RTK signaling antagonist 2 [Source:HGNC Symbol;Acc:HGNC:11270]	-
ENSG00000071082	4921.01	2574.97	0.934551	9e-06	0.000143148	RPL31	2	101001715	101024032	+	5791	protein_coding	ribosomal protein L31 [Source:HGNC Symbol;Acc:HGNC:10334]	-
ENSG00000176678	16.2521	3.47831	2.21467	9.07e-06	0.000144103	FOXL1	16	86576368	86582160	+	3742	protein_coding	forkhead box L1 [Source:HGNC Symbol;Acc:HGNC:3817]	Fork
ENSG00000166435	116.131	67.0639	0.792782	9.15e-06	0.000145371	XRRA1	11	74807739	74949200	-	9086	protein_coding	X-ray radiation resistance associated 1 [Source:HGNC Symbol;Acc:HGNC:18868]	-
ENSG00000144645	550.29	317.044	0.792865	9.28e-06	0.000147197	OSBPL10	3	31657890	32077580	-	11976	protein_coding	oxysterol binding protein like 10 [Source:HGNC Symbol;Acc:HGNC:16395]	-
ENSG00000078804	357.63	577.006	-0.687136	9.28e-06	0.000147197	TP53INP2	20	34704290	34713439	+	4228	protein_coding	tumor protein p53 inducible nuclear protein 2 [Source:HGNC Symbol;Acc:HGNC:16104]	-
ENSG00000145882	105.203	189.17	-0.836628	9.31e-06	0.000147514	PCYOX1L	5	149358007	149369653	+	6069	protein_coding	prenylcysteine oxidase 1 like [Source:HGNC Symbol;Acc:HGNC:28477]	-
ENSG00000075340	188.342	323.515	-0.775011	9.36e-06	0.000148208	ADD2	2	70607618	70768225	-	12673	protein_coding	adducin 2 [Source:HGNC Symbol;Acc:HGNC:244]	-
ENSG00000169964	139.462	67.287	1.04534	9.37e-06	0.000148315	TMEM42	3	44861869	44865670	+	3106	protein_coding	transmembrane protein 42 [Source:HGNC Symbol;Acc:HGNC:28444]	-
ENSG00000167874	542.129	286.51	0.916456	9.47e-06	0.000149784	TMEM88	17	7855065	7856099	+	875	protein_coding	transmembrane protein 88 [Source:HGNC Symbol;Acc:HGNC:32371]	-
ENSG00000168096	333.661	155.597	1.09621	9.55e-06	0.000150842	ANKS3	16	4696510	4734378	-	7868	protein_coding	ankyrin repeat and sterile alpha motif domain containing 3 [Source:HGNC Symbol;Acc:HGNC:29422]	-
ENSG00000162572	79.8468	24.0841	1.73811	9.6e-06	0.000151505	SCNN1D	1	1280436	1292029	+	4025	protein_coding	sodium channel epithelial 1 delta subunit [Source:HGNC Symbol;Acc:HGNC:10601]	-
ENSG00000196517	58.1873	119.901	-1.0578	9.6e-06	0.000151505	SLC6A9	1	43991500	44031467	-	5159	protein_coding	solute carrier family 6 member 9 [Source:HGNC Symbol;Acc:HGNC:11056]	-
ENSG00000275395	491.992	142.476	1.78529	9.65e-06	0.000152108	FCGBP	19	39863323	39934626	-	12961	protein_coding	Fc fragment of IgG binding protein [Source:HGNC Symbol;Acc:HGNC:13572]	-
ENSG00000128989	448.079	796.085	-0.825111	9.66e-06	0.000152166	ARPP19	15	52547045	52569883	-	6917	protein_coding	cAMP regulated phosphoprotein 19 [Source:HGNC Symbol;Acc:HGNC:16967]	-
ENSG00000129128	1022.19	1863.53	-0.864616	9.71e-06	0.000152874	SPCS3	4	176319964	176332245	+	6831	protein_coding	signal peptidase complex subunit 3 [Source:HGNC Symbol;Acc:HGNC:26212]	-
ENSG00000117280	458.19	751.842	-0.718235	9.84e-06	0.000154764	RAB29	1	205767986	205775460	-	3882	protein_coding	RAB29, member RAS oncogene family [Source:HGNC Symbol;Acc:HGNC:9789]	-
ENSG00000127526	565.359	339.835	0.736654	9.88e-06	0.000155265	SLC35E1	19	16549831	16572382	-	7257	protein_coding	solute carrier family 35 member E1 [Source:HGNC Symbol;Acc:HGNC:20803]	-
ENSG00000156858	370.096	241.187	0.613981	9.93e-06	0.000156072	PRR14	16	30650717	30656440	+	3860	protein_coding	proline rich 14 [Source:HGNC Symbol;Acc:HGNC:28458]	-
ENSG00000130021	57.1205	149.772	-1.39719	1.01e-05	0.000158232	PUDP	X	7048920	7148190	-	3168	protein_coding	pseudouridine 5'-phosphatase [Source:HGNC Symbol;Acc:HGNC:16818]	-
ENSG00000105329	1186.18	595.984	0.991446	1.01e-05	0.000158232	TGFB1	19	41301587	41353911	-	3238	protein_coding	transforming growth factor beta 1 [Source:HGNC Symbol;Acc:HGNC:11766]	-
ENSG00000177283	478.771	257.186	0.898526	1.01e-05	0.000158363	FZD8	10	35638249	35642278	-	4030	protein_coding	frizzled class receptor 8 [Source:HGNC Symbol;Acc:HGNC:4046]	-
ENSG00000015532	307.398	163.852	0.912272	1.02e-05	0.000159209	XYLT2	17	50346092	50363138	+	5472	protein_coding	xylosyltransferase 2 [Source:HGNC Symbol;Acc:HGNC:15517]	-
ENSG00000249485	43.868	90.4164	-1.05553	1.02e-05	0.000160031	RBBP4P1	5	14797125	14798400	-	1276	processed_pseudogene	RB binding protein 4 pseudogene 1 [Source:HGNC Symbol;Acc:HGNC:42368]	-
ENSG00000119969	529.321	884.241	-0.738743	1.04e-05	0.00016195	HELLS	10	94501434	94613905	+	10148	protein_coding	helicase, lymphoid specific [Source:HGNC Symbol;Acc:HGNC:4861]	-
ENSG00000172216	525.246	244.908	1.10213	1.04e-05	0.000161956	CEBPB	20	50190734	50192689	+	1956	protein_coding	CCAAT enhancer binding protein beta [Source:HGNC Symbol;Acc:HGNC:1834]	C/EBP
ENSG00000121903	213.958	87.0213	1.29159	1.04e-05	0.000162408	ZSCAN20	1	33472645	33496507	+	5308	protein_coding	zinc finger and SCAN domain containing 20 [Source:HGNC Symbol;Acc:HGNC:13093]	zf-C2H2
ENSG00000163738	153.85	250.637	-0.698365	1.04e-05	0.000162408	MTHFD2L	4	74114174	74303099	+	9819	protein_coding	methylenetetrahydrofolate dehydrogenase (NADP+ dependent) 2 like [Source:HGNC Symbol;Acc:HGNC:31865]	-
ENSG00000130703	1096.51	703.41	0.641963	1.04e-05	0.000162779	OSBPL2	20	62231922	62296213	+	13047	protein_coding	oxysterol binding protein like 2 [Source:HGNC Symbol;Acc:HGNC:15761]	-
ENSG00000152518	817.21	522.171	0.64739	1.05e-05	0.000163573	ZFP36L2	2	43222402	43226609	-	3696	protein_coding	ZFP36 ring finger protein like 2 [Source:HGNC Symbol;Acc:HGNC:1108]	Others
ENSG00000127080	256.291	173.013	0.567297	1.05e-05	0.000164256	IPPK	9	92613184	92670265	-	5166	protein_coding	inositol-pentakisphosphate 2-kinase [Source:HGNC Symbol;Acc:HGNC:14645]	-
ENSG00000118785	317.851	68.2117	2.22328	1.06e-05	0.000164291	SPP1	4	87975650	87983426	+	2321	protein_coding	secreted phosphoprotein 1 [Source:HGNC Symbol;Acc:HGNC:11255]	-
ENSG00000100814	1009.61	603.936	0.742685	1.06e-05	0.000164319	CCNB1IP1	14	20311368	20333312	-	3680	protein_coding	cyclin B1 interacting protein 1 [Source:HGNC Symbol;Acc:HGNC:19437]	-
ENSG00000095739	33.1603	8.91623	1.89491	1.07e-05	0.000165835	BAMBI	10	28677342	28682939	+	2314	protein_coding	BMP and activin membrane bound inhibitor [Source:HGNC Symbol;Acc:HGNC:30251]	-
ENSG00000156650	247.94	406.852	-0.718367	1.07e-05	0.000165944	KAT6B	10	74824927	75032624	+	32495	protein_coding	lysine acetyltransferase 6B [Source:HGNC Symbol;Acc:HGNC:17582]	-
ENSG00000067191	316.45	191.237	0.725986	1.07e-05	0.000166604	CACNB1	17	39173456	39197703	-	7094	protein_coding	calcium voltage-gated channel auxiliary subunit beta 1 [Source:HGNC Symbol;Acc:HGNC:1401]	-
ENSG00000140961	344.895	143.503	1.26239	1.1e-05	0.000170881	OSGIN1	16	83948282	83966332	+	3460	protein_coding	oxidative stress induced growth inhibitor 1 [Source:HGNC Symbol;Acc:HGNC:30093]	-
ENSG00000144802	896.463	170.97	2.38945	1.11e-05	0.000172113	NFKBIZ	3	101827991	101861022	+	5902	protein_coding	NFKB inhibitor zeta [Source:HGNC Symbol;Acc:HGNC:29805]	-
ENSG00000111670	223.535	468.208	-1.05989	1.12e-05	0.000173008	GNPTAB	12	101745497	101830938	-	9755	protein_coding	N-acetylglucosamine-1-phosphate transferase subunits alpha and beta [Source:HGNC Symbol;Acc:HGNC:29670]	-
ENSG00000107862	1547.72	1109.81	0.478581	1.12e-05	0.000173844	GBF1	10	102245532	102382899	+	6641	protein_coding	golgi brefeldin A resistant guanine nucleotide exchange factor 1 [Source:HGNC Symbol;Acc:HGNC:4181]	-
ENSG00000182628	419.462	798.996	-0.925871	1.12e-05	0.000173844	SKA2	17	59109951	59155269	-	3148	protein_coding	spindle and kinetochore associated complex subunit 2 [Source:HGNC Symbol;Acc:HGNC:28006]	-
ENSG00000180098	533.092	306.344	0.796461	1.13e-05	0.000174054	TRNAU1AP	1	28553085	28578545	+	4311	protein_coding	tRNA selenocysteine 1 associated protein 1 [Source:HGNC Symbol;Acc:HGNC:30813]	-
ENSG00000078053	135.575	237.538	-0.799697	1.13e-05	0.000174054	AMPH	7	38383704	38631567	-	5636	protein_coding	amphiphysin [Source:HGNC Symbol;Acc:HGNC:471]	-
ENSG00000157851	368.201	941.75	-1.35878	1.13e-05	0.000174054	DPYSL5	2	26847747	26950351	+	7079	protein_coding	dihydropyrimidinase like 5 [Source:HGNC Symbol;Acc:HGNC:20637]	-
ENSG00000172071	411.981	234.597	0.815151	1.13e-05	0.000174054	EIF2AK3	2	88556741	88627576	-	5434	protein_coding	eukaryotic translation initiation factor 2 alpha kinase 3 [Source:HGNC Symbol;Acc:HGNC:3255]	-
ENSG00000280385	32.1622	118.016	-1.84936	1.13e-05	0.000174054	AP000648.3	11	90193614	90198120	+	4507	TEC	novel transcript	-
ENSG00000150687	154.55	92.1109	0.745133	1.13e-05	0.000174054	PRSS23	11	86791059	86952910	+	11725	protein_coding	serine protease 23 [Source:HGNC Symbol;Acc:HGNC:14370]	-
ENSG00000139318	11690.4	4906.96	1.25256	1.13e-05	0.000174054	DUSP6	12	89347232	89353271	-	4632	protein_coding	dual specificity phosphatase 6 [Source:HGNC Symbol;Acc:HGNC:3072]	-
ENSG00000088305	362.181	572.744	-0.656028	1.14e-05	0.000174985	DNMT3B	20	32762385	32809356	+	4630	protein_coding	DNA methyltransferase 3 beta [Source:HGNC Symbol;Acc:HGNC:2979]	-
ENSG00000122574	411.287	231.054	0.836161	1.14e-05	0.000175034	WIPF3	7	29806486	29917066	+	6065	protein_coding	WAS/WASL interacting protein family member 3 [Source:HGNC Symbol;Acc:HGNC:22004]	-
ENSG00000173402	1196.89	2810.68	-1.23298	1.14e-05	0.000175034	DAG1	3	49468703	49535618	+	6923	protein_coding	dystroglycan 1 [Source:HGNC Symbol;Acc:HGNC:2666]	-
ENSG00000155366	1491.97	799.876	0.899548	1.14e-05	0.000175211	RHOC	1	112701106	112707434	-	4028	protein_coding	ras homolog family member C [Source:HGNC Symbol;Acc:HGNC:669]	-
ENSG00000090238	335.975	103.378	1.70393	1.15e-05	0.000175688	YPEL3	16	30092314	30096915	-	3181	protein_coding	yippee like 3 [Source:HGNC Symbol;Acc:HGNC:18327]	-
ENSG00000133069	268.587	437.525	-0.709192	1.15e-05	0.000176397	TMCC2	1	205228176	205285632	+	5592	protein_coding	transmembrane and coiled-coil domain family 2 [Source:HGNC Symbol;Acc:HGNC:24239]	-
ENSG00000083799	399.097	272.733	0.552441	1.16e-05	0.000176868	CYLD	16	50742050	50801935	+	12954	protein_coding	CYLD lysine 63 deubiquitinase [Source:HGNC Symbol;Acc:HGNC:2584]	-
ENSG00000168488	2248.4	1159.75	0.954264	1.16e-05	0.000177555	ATXN2L	16	28823035	28837237	+	6508	protein_coding	ataxin 2 like [Source:HGNC Symbol;Acc:HGNC:31326]	-
ENSG00000240024	384.881	252.26	0.613505	1.17e-05	0.000178145	LINC00888	3	183447608	183456013	+	2131	transcribed_unprocessed_pseudogene	long intergenic non-protein coding RNA 888 [Source:HGNC Symbol;Acc:HGNC:48575]	-
ENSG00000174839	166.875	276.259	-0.732237	1.17e-05	0.000178922	DENND6A	3	57625457	57693089	-	5124	protein_coding	DENN domain containing 6A [Source:HGNC Symbol;Acc:HGNC:26635]	-
ENSG00000165675	114.586	231.922	-1.008	1.18e-05	0.000179752	ENOX2	X	130623369	130903317	-	4279	protein_coding	ecto-NOX disulfide-thiol exchanger 2 [Source:HGNC Symbol;Acc:HGNC:2259]	-
ENSG00000005243	67.7596	27.6409	1.28217	1.19e-05	0.000181493	COPZ2	17	48026167	48038030	-	1851	protein_coding	coatomer protein complex subunit zeta 2 [Source:HGNC Symbol;Acc:HGNC:19356]	-
ENSG00000009307	5967.59	9817.8	-0.717999	1.19e-05	0.000181641	CSDE1	1	114716913	114758676	-	5778	protein_coding	cold shock domain containing E1 [Source:HGNC Symbol;Acc:HGNC:29905]	CSD
ENSG00000227507	31.0245	1.5969	4.24891	1.19e-05	0.000181775	LTB	6	31580525	31582522	-	1535	protein_coding	lymphotoxin beta [Source:HGNC Symbol;Acc:HGNC:6711]	-
ENSG00000129204	61.6487	145.258	-1.22036	1.2e-05	0.000182356	USP6	17	5116438	5175034	+	11270	protein_coding	ubiquitin specific peptidase 6 [Source:HGNC Symbol;Acc:HGNC:12629]	-
ENSG00000198892	239.887	128.173	0.899091	1.21e-05	0.000183299	SHISA4	1	201888680	201892306	+	1746	protein_coding	shisa family member 4 [Source:HGNC Symbol;Acc:HGNC:27139]	-
ENSG00000186260	193.467	355.035	-0.868042	1.21e-05	0.000184168	MRTFB	16	14071321	14266773	+	16578	protein_coding	myocardin related transcription factor B [Source:HGNC Symbol;Acc:HGNC:29819]	-
ENSG00000137745	12.6268	0.352294	5.14008	1.22e-05	0.000185462	MMP13	11	102942995	102955734	-	2834	protein_coding	matrix metallopeptidase 13 [Source:HGNC Symbol;Acc:HGNC:7159]	-
ENSG00000130304	406.452	234.677	0.790366	1.25e-05	0.000189478	SLC27A1	19	17468769	17506168	+	8249	protein_coding	solute carrier family 27 member 1 [Source:HGNC Symbol;Acc:HGNC:10995]	-
ENSG00000136754	596.974	399.235	0.57914	1.25e-05	0.000189978	ABI1	10	26746593	26861087	-	4218	protein_coding	abl interactor 1 [Source:HGNC Symbol;Acc:HGNC:11320]	-
ENSG00000174021	305.544	164.786	0.888611	1.26e-05	0.000190536	GNG5	1	84498325	84506565	-	1112	protein_coding	G protein subunit gamma 5 [Source:HGNC Symbol;Acc:HGNC:4408]	-
ENSG00000231513	15.4969	41.7218	-1.41372	1.27e-05	0.000192312	E2F6P4	X	136097835	136098348	-	514	processed_pseudogene	E2F transcription factor 6 pseudogene 4 [Source:HGNC Symbol;Acc:HGNC:51452]	-
ENSG00000146278	487.797	113.093	2.11062	1.27e-05	0.000192441	PNRC1	6	89080751	89085160	+	2992	protein_coding	proline rich nuclear receptor coactivator 1 [Source:HGNC Symbol;Acc:HGNC:17278]	-
ENSG00000115993	319.297	516.895	-0.690769	1.28e-05	0.000192901	TRAK2	2	201377207	201451579	-	7595	protein_coding	trafficking kinesin protein 2 [Source:HGNC Symbol;Acc:HGNC:13206]	-
ENSG00000117614	625.586	310.347	1.01413	1.28e-05	0.00019293	SYF2	1	25222679	25232502	-	3370	protein_coding	SYF2 pre-mRNA splicing factor [Source:HGNC Symbol;Acc:HGNC:19824]	-
ENSG00000146263	238.282	392.902	-0.716786	1.28e-05	0.000193133	MMS22L	6	97142161	97283217	-	21793	protein_coding	MMS22 like, DNA repair protein [Source:HGNC Symbol;Acc:HGNC:21475]	-
ENSG00000233337	1.78775	16.0377	-3.06779	1.28e-05	0.000193304	UBE2FP3	1	111437514	111438037	+	524	processed_pseudogene	UBE2F pseudogene 3 [Source:HGNC Symbol;Acc:HGNC:44537]	-
ENSG00000106546	77.187	34.4789	1.17652	1.28e-05	0.000193304	AHR	7	16916359	17346152	+	8081	protein_coding	aryl hydrocarbon receptor [Source:HGNC Symbol;Acc:HGNC:348]	bHLH
ENSG00000197958	21329.5	11945.7	0.836271	1.28e-05	0.0001935	RPL12	9	127447674	127451405	-	2452	protein_coding	ribosomal protein L12 [Source:HGNC Symbol;Acc:HGNC:10302]	-
ENSG00000141401	163.727	350.12	-1.10616	1.29e-05	0.00019375	IMPA2	18	11981025	12030883	+	3825	protein_coding	inositol monophosphatase 2 [Source:HGNC Symbol;Acc:HGNC:6051]	-
ENSG00000165359	211.235	424.457	-1.00036	1.3e-05	0.000195182	INTS6L	X	135520643	135582510	+	7193	protein_coding	integrator complex subunit 6 like [Source:HGNC Symbol;Acc:HGNC:27334]	-
ENSG00000188643	72.1363	29.9839	1.26386	1.3e-05	0.000195596	S100A16	1	153606886	153613145	-	1701	protein_coding	S100 calcium binding protein A16 [Source:HGNC Symbol;Acc:HGNC:20441]	-
ENSG00000214900	34.3435	10.4001	1.71104	1.31e-05	0.000197381	LINC01588	14	49927571	50092643	-	14763	lincRNA	long intergenic non-protein coding RNA 1588 [Source:HGNC Symbol;Acc:HGNC:27503]	-
ENSG00000285108	9.47029	36.4949	-1.90505	1.32e-05	0.000198379	AC103718.1	8	129685401	129723023	-	10728	lincRNA	novel transcript	-
ENSG00000113368	1500.09	2638.48	-0.815757	1.32e-05	0.000198379	LMNB1	5	126776623	126837020	+	3633	protein_coding	lamin B1 [Source:HGNC Symbol;Acc:HGNC:6637]	-
ENSG00000132646	1138.29	2245.28	-0.981466	1.33e-05	0.000199043	PCNA	20	5114953	5126626	-	1471	protein_coding	proliferating cell nuclear antigen [Source:HGNC Symbol;Acc:HGNC:8729]	-
ENSG00000150556	58.8977	23.4984	1.32067	1.33e-05	0.000199137	LYPD6B	2	149038107	149215262	+	3771	protein_coding	LY6/PLAUR domain containing 6B [Source:HGNC Symbol;Acc:HGNC:27018]	-
ENSG00000274605	117.359	67.8895	0.787578	1.33e-05	0.000199263	AL355338.1	13	100086031	100088848	-	913	lincRNA	uncharacterized LOC105370333 [Source:NCBI gene;Acc:105370333]	-
ENSG00000171867	602.557	897.909	-0.573571	1.34e-05	0.000199853	PRNP	20	4686236	4701590	+	2851	protein_coding	prion protein [Source:HGNC Symbol;Acc:HGNC:9449]	-
ENSG00000179862	186.748	84.5898	1.13528	1.34e-05	0.000200499	CITED4	1	40861051	40862366	-	1316	protein_coding	Cbp/p300 interacting transactivator with Glu/Asp rich carboxy-terminal domain 4 [Source:HGNC Symbol;Acc:HGNC:18696]	-
ENSG00000187953	523.277	303.571	0.788727	1.34e-05	0.000200727	PMS2CL	7	6710128	6753862	+	3879	transcribed_unprocessed_pseudogene	PMS2 C-terminal like pseudogene [Source:HGNC Symbol;Acc:HGNC:30061]	-
ENSG00000120937	7.88568	0	6.30402	1.35e-05	0.000200972	NPPB	1	11857464	11858931	-	694	protein_coding	natriuretic peptide B [Source:HGNC Symbol;Acc:HGNC:7940]	-
ENSG00000110841	1223.27	757.834	0.692475	1.35e-05	0.000201125	PPFIBP1	12	27523431	27695564	+	11690	protein_coding	PPFIA binding protein 1 [Source:HGNC Symbol;Acc:HGNC:9249]	-
ENSG00000121068	208.162	114.111	0.861772	1.36e-05	0.000202333	TBX2	17	61399896	61409466	+	6029	protein_coding	T-box 2 [Source:HGNC Symbol;Acc:HGNC:11597]	T-box
ENSG00000229951	15.8197	3.24531	2.25627	1.36e-05	0.000202333	FLJ31356	2	28384409	28394672	-	3001	antisense	uncharacterized protein FLJ31356 [Source:NCBI gene;Acc:403150]	-
ENSG00000183337	469.334	254.081	0.885155	1.36e-05	0.000202333	BCOR	X	40049815	40177329	-	8544	protein_coding	BCL6 corepressor [Source:HGNC Symbol;Acc:HGNC:20893]	-
ENSG00000145545	259.138	390.232	-0.586049	1.36e-05	0.000202782	SRD5A1	5	6633343	6674386	+	7715	protein_coding	steroid 5 alpha-reductase 1 [Source:HGNC Symbol;Acc:HGNC:11284]	-
ENSG00000136026	1196.04	1663.79	-0.47798	1.36e-05	0.000202828	CKAP4	12	106237877	106304279	-	3638	protein_coding	cytoskeleton associated protein 4 [Source:HGNC Symbol;Acc:HGNC:16991]	-
ENSG00000228649	16.406	42.0502	-1.37973	1.38e-05	0.000204412	SNHG26	7	22854178	22861579	+	2627	processed_transcript	small nucleolar RNA host gene 26 [Source:HGNC Symbol;Acc:HGNC:53131]	-
ENSG00000064886	13.8611	52.4503	-1.86944	1.38e-05	0.000204419	CHI3L2	1	111200771	111243440	+	3295	protein_coding	chitinase 3 like 2 [Source:HGNC Symbol;Acc:HGNC:1933]	-
ENSG00000133935	326.623	544.467	-0.735637	1.38e-05	0.000205112	ERG28	14	75649791	75661189	-	2633	protein_coding	ergosterol biosynthesis 28 homolog [Source:HGNC Symbol;Acc:HGNC:1187]	-
ENSG00000118985	403.078	170.981	1.24085	1.38e-05	0.000205309	ELL2	5	95885098	95962071	-	7328	protein_coding	elongation factor for RNA polymerase II 2 [Source:HGNC Symbol;Acc:HGNC:17064]	-
ENSG00000241404	3.22186	19.9894	-2.60373	1.39e-05	0.000205309	EGFL8	6	32164583	32168281	+	2621	protein_coding	EGF like domain multiple 8 [Source:HGNC Symbol;Acc:HGNC:13944]	-
ENSG00000137692	889.443	652.894	0.445738	1.39e-05	0.000205831	DCUN1D5	11	103062076	103092215	-	1700	protein_coding	defective in cullin neddylation 1 domain containing 5 [Source:HGNC Symbol;Acc:HGNC:28409]	-
ENSG00000171109	352.085	608.305	-0.784793	1.39e-05	0.000206217	MFN1	3	179347692	179394931	+	5957	protein_coding	mitofusin 1 [Source:HGNC Symbol;Acc:HGNC:18262]	-
ENSG00000143751	700.122	475.323	0.558797	1.4e-05	0.000206771	SDE2	1	225982702	225999331	-	3975	protein_coding	SDE2 telomere maintenance homolog [Source:HGNC Symbol;Acc:HGNC:26643]	-
ENSG00000237991	32.5141	8.23861	1.95938	1.4e-05	0.000207043	RPL35P1	1	236981339	236981708	+	370	processed_pseudogene	ribosomal protein L35 pseudogene 1 [Source:HGNC Symbol;Acc:HGNC:36695]	-
ENSG00000279530	0.239963	10.7299	-4.80362	1.41e-05	0.000207911	AC092881.1	12	70321542	70324274	-	2733	TEC	TEC	-
ENSG00000283959	32.6619	9.44789	1.80322	1.43e-05	0.000210689	AP002851.1	8	102656464	102687118	+	2130	bidirectional_promoter_lncRNA	vegetative cell wall protein gp1-like [Source:NCBI gene;Acc:101927245]	-
ENSG00000139531	113.045	196.331	-0.797048	1.43e-05	0.000210689	SUOX	12	55997180	56006641	+	5008	protein_coding	sulfite oxidase [Source:HGNC Symbol;Acc:HGNC:11460]	-
ENSG00000186352	634.354	21.9575	4.8529	1.44e-05	0.000211931	ANKRD37	4	185396021	185400628	+	2580	protein_coding	ankyrin repeat domain 37 [Source:HGNC Symbol;Acc:HGNC:29593]	-
ENSG00000184058	493.143	275.951	0.836135	1.44e-05	0.000211931	TBX1	22	19756703	19783593	+	3580	protein_coding	T-box 1 [Source:HGNC Symbol;Acc:HGNC:11592]	T-box
ENSG00000165655	252.333	117.998	1.09789	1.44e-05	0.000212226	ZNF503	10	75397830	75401906	-	3347	protein_coding	zinc finger protein 503 [Source:HGNC Symbol;Acc:HGNC:23589]	-
ENSG00000185291	29.547	9.0199	1.70441	1.44e-05	0.000212226	IL3RA	X	1336616	1382689	+	1710	protein_coding	interleukin 3 receptor subunit alpha [Source:HGNC Symbol;Acc:HGNC:6012]	-
ENSG00000163516	989.161	257.153	1.94451	1.46e-05	0.00021393	ANKZF1	2	219229757	219236669	+	6119	protein_coding	ankyrin repeat and zinc finger domain containing 1 [Source:HGNC Symbol;Acc:HGNC:25527]	-
ENSG00000019549	1656.98	692.074	1.26047	1.46e-05	0.00021393	SNAI2	8	48917604	48921740	-	3392	protein_coding	snail family transcriptional repressor 2 [Source:HGNC Symbol;Acc:HGNC:11094]	zf-C2H2
ENSG00000111602	784.423	1328.34	-0.762285	1.46e-05	0.000214266	TIMELESS	12	56416373	56449403	-	5818	protein_coding	timeless circadian regulator [Source:HGNC Symbol;Acc:HGNC:11813]	-
ENSG00000057757	752.601	534.535	0.49072	1.47e-05	0.000216219	PITHD1	1	23778405	23788232	+	2186	protein_coding	PITH domain containing 1 [Source:HGNC Symbol;Acc:HGNC:25022]	-
ENSG00000105926	391.491	632.275	-0.687152	1.48e-05	0.00021646	MPP6	7	24573268	24694193	+	9369	protein_coding	membrane palmitoylated protein 6 [Source:HGNC Symbol;Acc:HGNC:18167]	-
ENSG00000197705	50.9433	136.434	-1.39919	1.49e-05	0.000218235	KLHL14	18	32672671	32773062	-	4992	protein_coding	kelch like family member 14 [Source:HGNC Symbol;Acc:HGNC:29266]	-
ENSG00000167625	245.819	116.017	1.07749	1.51e-05	0.000221363	ZNF526	19	42220271	42228201	+	4271	protein_coding	zinc finger protein 526 [Source:HGNC Symbol;Acc:HGNC:29415]	zf-C2H2
ENSG00000100575	450.176	273.915	0.718128	1.51e-05	0.000221363	TIMM9	14	58408494	58427614	-	1500	protein_coding	translocase of inner mitochondrial membrane 9 [Source:HGNC Symbol;Acc:HGNC:11819]	-
ENSG00000134248	1049.16	761.541	0.461627	1.52e-05	0.000221661	LAMTOR5	1	110401249	110407942	-	2388	protein_coding	late endosomal/lysosomal adaptor, MAPK and MTOR activator 5 [Source:HGNC Symbol;Acc:HGNC:17955]	-
ENSG00000097096	96.5771	51.0936	0.926542	1.52e-05	0.000221661	SYDE2	1	85156873	85201046	-	6451	protein_coding	synapse defective Rho GTPase homolog 2 [Source:HGNC Symbol;Acc:HGNC:25841]	-
ENSG00000119912	360.255	686.508	-0.926274	1.52e-05	0.000222071	IDE	10	92451684	92574076	-	7607	protein_coding	insulin degrading enzyme [Source:HGNC Symbol;Acc:HGNC:5381]	-
ENSG00000130844	286.367	479.521	-0.742193	1.53e-05	0.000222638	ZNF331	19	53519527	53580269	+	8926	protein_coding	zinc finger protein 331 [Source:HGNC Symbol;Acc:HGNC:15489]	zf-C2H2
ENSG00000136444	299.344	461.774	-0.629876	1.53e-05	0.000222638	RSAD1	17	50478800	50485975	+	4198	protein_coding	radical S-adenosyl methionine domain containing 1 [Source:HGNC Symbol;Acc:HGNC:25634]	-
ENSG00000125648	601.446	840.233	-0.483797	1.54e-05	0.000223872	SLC25A23	19	6436079	6465203	-	4859	protein_coding	solute carrier family 25 member 23 [Source:HGNC Symbol;Acc:HGNC:19375]	-
ENSG00000164976	154.625	283.727	-0.881484	1.55e-05	0.00022596	MYORG	9	34366670	34376853	-	6398	protein_coding	myogenesis regulating glycosidase (putative) [Source:HGNC Symbol;Acc:HGNC:19918]	-
ENSG00000102053	9.02978	29.6751	-1.67559	1.57e-05	0.000228035	ZC3H12B	X	65366638	65507887	+	7829	protein_coding	zinc finger CCCH-type containing 12B [Source:HGNC Symbol;Acc:HGNC:17407]	-
ENSG00000121644	605.046	948.783	-0.645765	1.57e-05	0.000228741	DESI2	1	244652935	244709033	+	5104	protein_coding	desumoylating isopeptidase 2 [Source:HGNC Symbol;Acc:HGNC:24264]	-
ENSG00000130255	4894.4	2473.94	0.984023	1.59e-05	0.000230689	RPL36	19	5674947	5691876	+	2272	protein_coding	ribosomal protein L36 [Source:HGNC Symbol;Acc:HGNC:13631]	-
ENSG00000144554	581.985	955.409	-0.718757	1.62e-05	0.000235048	FANCD2	3	10026414	10101930	+	8378	protein_coding	FA complementation group D2 [Source:HGNC Symbol;Acc:HGNC:3585]	-
ENSG00000204498	255.047	121.196	1.06723	1.63e-05	0.000235981	NFKBIL1	6	31546870	31558829	+	1779	protein_coding	NFKB inhibitor like 1 [Source:HGNC Symbol;Acc:HGNC:7800]	-
ENSG00000175556	243.07	112.968	1.09921	1.63e-05	0.000236013	LONRF3	X	118974614	119018355	+	4041	protein_coding	LON peptidase N-terminal domain and ring finger 3 [Source:HGNC Symbol;Acc:HGNC:21152]	-
ENSG00000166289	47.5629	21.4805	1.14282	1.63e-05	0.000236099	PLEKHF1	19	29665056	29675457	+	2681	protein_coding	pleckstrin homology and FYVE domain containing 1 [Source:HGNC Symbol;Acc:HGNC:20764]	-
ENSG00000175294	49.0397	8.16422	2.60315	1.64e-05	0.000236972	CATSPER1	11	66016752	66026517	-	2687	protein_coding	cation channel sperm associated 1 [Source:HGNC Symbol;Acc:HGNC:17116]	-
ENSG00000172725	1183.27	798.975	0.564649	1.65e-05	0.000239214	CORO1B	11	67435510	67443821	-	5327	protein_coding	coronin 1B [Source:HGNC Symbol;Acc:HGNC:2253]	-
ENSG00000184260	49.7332	7.00813	2.81333	1.65e-05	0.000239214	HIST2H2AC	1	149886975	149887364	+	390	protein_coding	histone cluster 2 H2A family member c [Source:HGNC Symbol;Acc:HGNC:4738]	-
ENSG00000233589	0.250073	10.3395	-4.75066	1.66e-05	0.000239638	AL138789.1	1	68479129	68483539	+	960	antisense	novel transcript	-
ENSG00000196418	70.9443	121.892	-0.783426	1.67e-05	0.000241207	ZNF124	1	247121975	247172016	-	4517	protein_coding	zinc finger protein 124 [Source:HGNC Symbol;Acc:HGNC:12907]	zf-C2H2
ENSG00000220875	17.7745	0.397575	5.54287	1.67e-05	0.000241207	HIST1H3PS1	6	26321876	26322292	-	417	processed_pseudogene	histone cluster 1 H3 pseudogene 1 [Source:HGNC Symbol;Acc:HGNC:18982]	-
ENSG00000198276	1089.24	572.898	0.92541	1.67e-05	0.00024161	UCKL1	20	63939829	63956415	-	3184	protein_coding	uridine-cytidine kinase 1 like 1 [Source:HGNC Symbol;Acc:HGNC:15938]	-
ENSG00000135829	2978.86	4859.09	-0.706469	1.68e-05	0.00024161	DHX9	1	182839369	182887751	+	5645	protein_coding	DExH-box helicase 9 [Source:HGNC Symbol;Acc:HGNC:2750]	-
ENSG00000262202	12.7464	1.89731	2.78105	1.68e-05	0.000241712	AC007952.4	17	19112000	19112636	-	637	lincRNA	novel transcript	-
ENSG00000183506	285.372	178.361	0.681766	1.7e-05	0.000244521	PI4KAP2	22	21473000	21517533	-	7474	transcribed_unitary_pseudogene	phosphatidylinositol 4-kinase alpha pseudogene 2 [Source:HGNC Symbol;Acc:HGNC:33577]	-
ENSG00000087586	973.876	1885.17	-0.954642	1.7e-05	0.000245192	AURKA	20	56369389	56392337	-	2928	protein_coding	aurora kinase A [Source:HGNC Symbol;Acc:HGNC:11393]	-
ENSG00000165633	29.557	66.5257	-1.15541	1.71e-05	0.00024609	VSTM4	10	49014245	49115509	-	8633	protein_coding	V-set and transmembrane domain containing 4 [Source:HGNC Symbol;Acc:HGNC:26470]	-
ENSG00000135324	135.836	281.836	-1.06319	1.71e-05	0.00024609	MRAP2	6	84033756	84090881	+	2153	protein_coding	melanocortin 2 receptor accessory protein 2 [Source:HGNC Symbol;Acc:HGNC:21232]	-
ENSG00000275215	38.966	1.76389	4.4385	1.73e-05	0.000248273	RNA5-8SN2	21	8395607	8395759	+	153	rRNA	RNA, 5.8S ribosomal N2 [Source:HGNC Symbol;Acc:HGNC:53521]	-
ENSG00000118518	136.735	236.218	-0.789945	1.75e-05	0.000251074	RNF146	6	127266610	127288567	+	3508	protein_coding	ring finger protein 146 [Source:HGNC Symbol;Acc:HGNC:21336]	-
ENSG00000138829	582.718	894.41	-0.615615	1.76e-05	0.000251725	FBN2	5	128257909	128659185	-	13196	protein_coding	fibrillin 2 [Source:HGNC Symbol;Acc:HGNC:3604]	-
ENSG00000276293	677.833	1206.19	-0.8342	1.76e-05	0.000251725	PIP4K2B	17	38765689	38800126	-	6135	protein_coding	phosphatidylinositol-5-phosphate 4-kinase type 2 beta [Source:HGNC Symbol;Acc:HGNC:8998]	-
ENSG00000170571	470.052	1111.49	-1.23884	1.76e-05	0.000252378	EMB	5	50396192	50443248	-	5257	protein_coding	embigin [Source:HGNC Symbol;Acc:HGNC:30465]	-
ENSG00000138356	11.2747	1.24219	3.18297	1.77e-05	0.000252774	AOX1	2	200585868	200677064	+	5556	protein_coding	aldehyde oxidase 1 [Source:HGNC Symbol;Acc:HGNC:553]	-
ENSG00000117318	1236.54	805.013	0.617494	1.77e-05	0.000253313	ID3	1	23557918	23559794	-	1797	protein_coding	inhibitor of DNA binding 3, HLH protein [Source:HGNC Symbol;Acc:HGNC:5362]	bHLH
ENSG00000240583	96.1367	49.2319	0.972047	1.77e-05	0.000253484	AQP1	7	30911694	30925516	+	3435	protein_coding	aquaporin 1 (Colton blood group) [Source:HGNC Symbol;Acc:HGNC:633]	-
ENSG00000134321	11.8272	1.63734	2.86498	1.78e-05	0.000253494	RSAD2	2	6865806	6898239	+	4834	protein_coding	radical S-adenosyl methionine domain containing 2 [Source:HGNC Symbol;Acc:HGNC:30908]	-
ENSG00000110911	333.832	556.507	-0.742476	1.78e-05	0.000253494	SLC11A2	12	50979401	51028566	-	10145	protein_coding	solute carrier family 11 member 2 [Source:HGNC Symbol;Acc:HGNC:10908]	-
ENSG00000108468	1016.44	1462.25	-0.523419	1.79e-05	0.000254736	CBX1	17	48070052	48101521	-	3087	protein_coding	chromobox 1 [Source:HGNC Symbol;Acc:HGNC:1551]	-
ENSG00000261351	6.40096	33.1678	-2.30722	1.79e-05	0.000255624	AC116913.1	15	66488658	66492109	-	2168	antisense	novel transcript, antisense to MAP2K1	-
ENSG00000160191	344.813	181.094	0.934123	1.8e-05	0.0002558	PDE9A	21	42653636	42775509	+	5266	protein_coding	phosphodiesterase 9A [Source:HGNC Symbol;Acc:HGNC:8795]	-
ENSG00000232533	48.4022	18.5733	1.38286	1.8e-05	0.000256543	AC093673.1	7	143379692	143380495	-	648	antisense	novel transcript	-
ENSG00000078140	954.653	1404.99	-0.555459	1.8e-05	0.000256543	UBE2K	4	39698044	39782792	+	5245	protein_coding	ubiquitin conjugating enzyme E2 K [Source:HGNC Symbol;Acc:HGNC:4914]	-
ENSG00000168685	112.258	18.5	2.59416	1.82e-05	0.000258319	IL7R	5	35852695	35879603	+	6060	protein_coding	interleukin 7 receptor [Source:HGNC Symbol;Acc:HGNC:6024]	-
ENSG00000261428	4.50746	25.6007	-2.46624	1.83e-05	0.00025982	AC097461.1	2	222566899	222569719	-	2821	antisense	novel transcript, antisense to SGPP2	-
ENSG00000243927	202.061	356.086	-0.816171	1.83e-05	0.000260282	MRPS6	21	34073224	34143034	+	4299	protein_coding	mitochondrial ribosomal protein S6 [Source:HGNC Symbol;Acc:HGNC:14051]	-
ENSG00000198924	187.756	373.458	-0.989245	1.83e-05	0.000260352	DCLRE1A	10	113834725	113854383	-	4600	protein_coding	DNA cross-link repair 1A [Source:HGNC Symbol;Acc:HGNC:17660]	-
ENSG00000159409	51.8753	20.0188	1.37794	1.85e-05	0.000262874	CELF3	1	151702404	151716814	-	4439	protein_coding	CUGBP Elav-like family member 3 [Source:HGNC Symbol;Acc:HGNC:11967]	-
ENSG00000123213	540.159	905.524	-0.743428	1.86e-05	0.000263061	NLN	5	65722196	65871725	+	10948	protein_coding	neurolysin [Source:HGNC Symbol;Acc:HGNC:16058]	-
ENSG00000264522	660.737	403.457	0.709375	1.86e-05	0.000263061	OTUD7B	1	149937812	150010676	-	12177	protein_coding	OTU deubiquitinase 7B [Source:HGNC Symbol;Acc:HGNC:16683]	-
ENSG00000100311	80.5739	14.723	2.45712	1.87e-05	0.000265176	PDGFB	22	39223359	39244751	-	3761	protein_coding	platelet derived growth factor subunit B [Source:HGNC Symbol;Acc:HGNC:8800]	-
ENSG00000143748	440.63	268.861	0.709341	1.88e-05	0.00026534	NVL	1	224227334	224330387	-	4813	protein_coding	nuclear VCP-like [Source:HGNC Symbol;Acc:HGNC:8070]	-
ENSG00000124782	382.297	260.177	0.556078	1.92e-05	0.000270654	RREB1	6	7107597	7251980	+	17254	protein_coding	ras responsive element binding protein 1 [Source:HGNC Symbol;Acc:HGNC:10449]	zf-C2H2
ENSG00000253352	569.962	1154.8	-1.01597	1.92e-05	0.000270654	TUG1	22	30969245	30979395	+	10151	bidirectional_promoter_lncRNA	taurine up-regulated 1 [Source:HGNC Symbol;Acc:HGNC:26066]	-
ENSG00000101224	976.488	1470.28	-0.592572	1.92e-05	0.000270654	CDC25B	20	3786772	3806121	+	4314	protein_coding	cell division cycle 25B [Source:HGNC Symbol;Acc:HGNC:1726]	-
ENSG00000102054	976.807	1379.21	-0.497831	1.92e-05	0.000271382	RBBP7	X	16839283	16870414	-	7392	protein_coding	RB binding protein 7, chromatin remodeling factor [Source:HGNC Symbol;Acc:HGNC:9890]	-
ENSG00000173992	248.918	159.179	0.640908	1.93e-05	0.000271382	CCS	11	66592821	66606019	+	2474	protein_coding	copper chaperone for superoxide dismutase [Source:HGNC Symbol;Acc:HGNC:1613]	-
ENSG00000154914	57.0588	16.4401	1.77946	1.94e-05	0.000273001	USP43	17	9644698	9729691	+	5068	protein_coding	ubiquitin specific peptidase 43 [Source:HGNC Symbol;Acc:HGNC:20072]	-
ENSG00000275092	12.4298	1.86793	2.75459	1.94e-05	0.000273763	AL031710.2	16	1707252	1707973	+	722	sense_intronic	novel transcript, sense intronic to MAPK8IP3	-
ENSG00000129084	250.516	377.099	-0.593521	1.95e-05	0.000274816	PSMA1	11	14504874	14643635	-	3301	protein_coding	proteasome subunit alpha 1 [Source:HGNC Symbol;Acc:HGNC:9530]	-
ENSG00000178988	655.726	926.334	-0.495841	1.96e-05	0.000275645	MRFAP1L1	4	6707701	6709880	-	2180	protein_coding	Morf4 family associated protein 1 like 1 [Source:HGNC Symbol;Acc:HGNC:28796]	-
ENSG00000128872	71.0314	195.837	-1.44761	1.98e-05	0.000277635	TMOD2	15	51751561	51816368	+	11636	protein_coding	tropomodulin 2 [Source:HGNC Symbol;Acc:HGNC:11872]	-
ENSG00000116001	693.357	1440.08	-1.05221	2.02e-05	0.000283757	TIA1	2	70209444	70248660	-	6607	protein_coding	TIA1 cytotoxic granule associated RNA binding protein [Source:HGNC Symbol;Acc:HGNC:11802]	-
ENSG00000134461	97.6879	48.181	1.00882	2.03e-05	0.000284874	ANKRD16	10	5861617	5889906	-	3059	protein_coding	ankyrin repeat domain 16 [Source:HGNC Symbol;Acc:HGNC:23471]	-
ENSG00000075239	559.79	861.104	-0.620589	2.03e-05	0.000284958	ACAT1	11	108121516	108147776	+	5584	protein_coding	acetyl-CoA acetyltransferase 1 [Source:HGNC Symbol;Acc:HGNC:93]	-
ENSG00000204859	413.955	235.142	0.811285	2.03e-05	0.000284958	ZBTB48	1	6580001	6589280	+	4503	protein_coding	zinc finger and BTB domain containing 48 [Source:HGNC Symbol;Acc:HGNC:4930]	ZBTB
ENSG00000174307	428.406	251.769	0.765742	2.04e-05	0.000286008	PHLDA3	1	201464383	201469237	-	3138	protein_coding	pleckstrin homology like domain family A member 3 [Source:HGNC Symbol;Acc:HGNC:8934]	-
ENSG00000183723	265.419	455.152	-0.775771	2.04e-05	0.000286008	CMTM4	16	66614750	66696707	-	8117	protein_coding	CKLF like MARVEL transmembrane domain containing 4 [Source:HGNC Symbol;Acc:HGNC:19175]	-
ENSG00000090612	114.255	314.325	-1.45046	2.07e-05	0.000289783	ZNF268	12	133181409	133214831	+	14095	protein_coding	zinc finger protein 268 [Source:HGNC Symbol;Acc:HGNC:13061]	zf-C2H2
ENSG00000221955	15.7208	2.75541	2.52473	2.08e-05	0.000290441	SLC12A8	3	125082636	125212864	-	5586	protein_coding	solute carrier family 12 member 8 [Source:HGNC Symbol;Acc:HGNC:15595]	-
ENSG00000284770	24.9337	61.9815	-1.33346	2.1e-05	0.000293487	TBCE	1	235367360	235452443	+	12444	protein_coding	tubulin folding cofactor E [Source:HGNC Symbol;Acc:HGNC:11582]	-
ENSG00000256229	161.251	265.811	-0.715065	2.12e-05	0.000295292	ZNF486	19	20167228	20200490	+	4261	protein_coding	zinc finger protein 486 [Source:HGNC Symbol;Acc:HGNC:20807]	zf-C2H2
ENSG00000205581	1919.11	2704.76	-0.496208	2.13e-05	0.0002968	HMGN1	21	39342315	39349647	-	5102	protein_coding	high mobility group nucleosome binding domain 1 [Source:HGNC Symbol;Acc:HGNC:4984]	-
ENSG00000083817	165.413	73.9663	1.15396	2.14e-05	0.000298257	ZNF416	19	57571566	57578927	-	2561	protein_coding	zinc finger protein 416 [Source:HGNC Symbol;Acc:HGNC:20645]	zf-C2H2
ENSG00000196189	23.9522	7.91151	1.5953	2.14e-05	0.000298257	SEMA4A	1	156147366	156177752	+	6822	protein_coding	semaphorin 4A [Source:HGNC Symbol;Acc:HGNC:10729]	-
ENSG00000183020	1294.54	955.388	0.438787	2.15e-05	0.000299952	AP2A2	11	924894	1012245	+	9638	protein_coding	adaptor related protein complex 2 subunit alpha 2 [Source:HGNC Symbol;Acc:HGNC:562]	-
ENSG00000232810	46.5218	0.169407	7.87899	2.17e-05	0.000302304	TNF	6	31575567	31578336	+	1676	protein_coding	tumor necrosis factor [Source:HGNC Symbol;Acc:HGNC:11892]	-
ENSG00000224272	11.0306	32.2245	-1.54641	2.21e-05	0.000307652	AC131097.3	2	241808312	241812016	-	2250	antisense	novel transcript	-
ENSG00000128050	3186.32	5070.83	-0.669997	2.22e-05	0.00030787	PAICS	4	56435741	56464579	+	7517	protein_coding	phosphoribosylaminoimidazole carboxylase and phosphoribosylaminoimidazolesuccinocarboxamide synthase [Source:HGNC Symbol;Acc:HGNC:8587]	-
ENSG00000270012	5.60119	24.2043	-2.17615	2.23e-05	0.000309674	AC232271.1	X	49273054	49275768	+	2715	lincRNA	novel transcript	-
ENSG00000100650	1871.52	3035.04	-0.698469	2.24e-05	0.000310198	SRSF5	14	69726900	69772005	+	5357	protein_coding	serine and arginine rich splicing factor 5 [Source:HGNC Symbol;Acc:HGNC:10787]	-
ENSG00000151726	443.463	615.528	-0.471999	2.24e-05	0.000310356	ACSL1	4	184755595	184826818	-	6284	protein_coding	acyl-CoA synthetase long chain family member 1 [Source:HGNC Symbol;Acc:HGNC:3569]	-
ENSG00000163590	141.843	373.28	-1.38708	2.26e-05	0.000312689	PPM1L	3	160755602	161078907	+	12447	protein_coding	protein phosphatase, Mg2+/Mn2+ dependent 1L [Source:HGNC Symbol;Acc:HGNC:16381]	-
ENSG00000162607	931.941	1893.49	-1.02105	2.26e-05	0.000312968	USP1	1	62436297	62451804	+	4263	protein_coding	ubiquitin specific peptidase 1 [Source:HGNC Symbol;Acc:HGNC:12607]	-
ENSG00000072778	3666.11	2345.14	0.645088	2.3e-05	0.000319054	ACADVL	17	7217125	7225273	+	4865	protein_coding	acyl-CoA dehydrogenase very long chain [Source:HGNC Symbol;Acc:HGNC:92]	-
ENSG00000253741	11.7294	36.2712	-1.63932	2.32e-05	0.000320577	LNCOC1	8	142702252	142726973	-	5684	antisense	lncRNA associated with ovarian cancer 1 [Source:HGNC Symbol;Acc:HGNC:53947]	-
ENSG00000183775	215.792	573.661	-1.4048	2.32e-05	0.000320981	KCTD16	5	144170832	144485686	+	14294	protein_coding	potassium channel tetramerization domain containing 16 [Source:HGNC Symbol;Acc:HGNC:29244]	-
ENSG00000171951	170.217	65.8209	1.378	2.36e-05	0.000325743	SCG2	2	223596940	223602503	-	2719	protein_coding	secretogranin II [Source:HGNC Symbol;Acc:HGNC:10575]	-
ENSG00000114999	983.711	1532.66	-0.641894	2.37e-05	0.0003277	TTL	2	112482154	112541739	+	15732	protein_coding	tubulin tyrosine ligase [Source:HGNC Symbol;Acc:HGNC:21586]	-
ENSG00000196296	718.266	1649.62	-1.2017	2.38e-05	0.000328302	ATP2A1	16	28878405	28904509	+	4587	protein_coding	ATPase sarcoplasmic/endoplasmic reticulum Ca2+ transporting 1 [Source:HGNC Symbol;Acc:HGNC:811]	-
ENSG00000132801	87.4586	45.4884	0.932375	2.39e-05	0.000329586	ZSWIM3	20	45857617	45879122	+	2773	protein_coding	zinc finger SWIM-type containing 3 [Source:HGNC Symbol;Acc:HGNC:16157]	-
ENSG00000155850	132.56	373.023	-1.48383	2.41e-05	0.00033148	SLC26A2	5	149960737	149993455	+	8606	protein_coding	solute carrier family 26 member 2 [Source:HGNC Symbol;Acc:HGNC:10994]	-
ENSG00000099290	735.802	518.864	0.501796	2.41e-05	0.000331689	WASHC2A	10	50067888	50133506	+	5159	protein_coding	WASH complex subunit 2A [Source:HGNC Symbol;Acc:HGNC:23416]	-
ENSG00000174151	181.412	378.742	-1.06894	2.41e-05	0.000332271	CYB561D1	1	109494052	109502932	+	5690	protein_coding	cytochrome b561 family member D1 [Source:HGNC Symbol;Acc:HGNC:26804]	-
ENSG00000135414	368.605	540.69	-0.556526	2.44e-05	0.00033519	GDF11	12	55743280	55757278	+	8657	protein_coding	growth differentiation factor 11 [Source:HGNC Symbol;Acc:HGNC:4216]	-
ENSG00000100097	5364.38	3463.08	0.631015	2.44e-05	0.000335195	LGALS1	22	37675608	37679806	+	1099	protein_coding	galectin 1 [Source:HGNC Symbol;Acc:HGNC:6561]	-
ENSG00000273143	22.9819	7.04235	1.73719	2.45e-05	0.000335911	AL355512.1	10	110428840	110496204	-	628	lincRNA	novel transcript	-
ENSG00000229124	70.6175	24.0506	1.56768	2.45e-05	0.000335911	VIM-AS1	10	17214239	17229985	-	1992	antisense	VIM antisense RNA 1 [Source:HGNC Symbol;Acc:HGNC:44879]	-
ENSG00000124532	275.825	412.345	-0.580352	2.46e-05	0.000337238	MRS2	6	24402908	24426194	+	5133	protein_coding	MRS2, magnesium transporter [Source:HGNC Symbol;Acc:HGNC:13785]	-
ENSG00000168807	250.215	364.827	-0.54548	2.47e-05	0.000339166	SNTB2	16	69187129	69309052	+	9875	protein_coding	syntrophin beta 2 [Source:HGNC Symbol;Acc:HGNC:11169]	-
ENSG00000170522	580.417	1017.21	-0.806775	2.48e-05	0.000340304	ELOVL6	4	110045846	110199199	-	7297	protein_coding	ELOVL fatty acid elongase 6 [Source:HGNC Symbol;Acc:HGNC:15829]	-
ENSG00000111877	62.4391	142.429	-1.2059	2.51e-05	0.000343022	MCM9	6	118813442	118935162	-	12496	protein_coding	minichromosome maintenance 9 homologous recombination repair factor [Source:HGNC Symbol;Acc:HGNC:21484]	-
ENSG00000086730	94.8818	48.4438	0.960071	2.51e-05	0.000343022	LAT2	7	74199652	74229834	+	4545	protein_coding	linker for activation of T cells family member 2 [Source:HGNC Symbol;Acc:HGNC:12749]	-
ENSG00000133020	44.9904	134.452	-1.56001	2.55e-05	0.000348344	MYH8	17	10390322	10421950	-	6041	protein_coding	myosin heavy chain 8 [Source:HGNC Symbol;Acc:HGNC:7578]	-
ENSG00000105245	581.2	322.322	0.848363	2.55e-05	0.000348344	NUMBL	19	40665905	40690972	-	5823	protein_coding	NUMB like, endocytic adaptor protein [Source:HGNC Symbol;Acc:HGNC:8061]	-
ENSG00000130529	420.442	215.072	0.967112	2.56e-05	0.000349221	TRPM4	19	49157741	49211836	+	6604	protein_coding	transient receptor potential cation channel subfamily M member 4 [Source:HGNC Symbol;Acc:HGNC:17993]	-
ENSG00000269973	14.3847	46.3734	-1.65966	2.56e-05	0.000349221	AC010969.2	2	9936360	9939590	+	3231	lincRNA	novel transcript	-
ENSG00000078668	1456.95	2185.75	-0.58623	2.56e-05	0.000349332	VDAC3	8	42391624	42405897	+	3141	protein_coding	voltage dependent anion channel 3 [Source:HGNC Symbol;Acc:HGNC:12674]	-
ENSG00000164849	45.0973	17.9569	1.32572	2.57e-05	0.000350129	GPR146	7	1044576	1059261	+	3160	protein_coding	G protein-coupled receptor 146 [Source:HGNC Symbol;Acc:HGNC:21718]	-
ENSG00000160124	407.602	236.048	0.79106	2.57e-05	0.000350282	CCDC58	3	122359591	122383231	-	1746	protein_coding	coiled-coil domain containing 58 [Source:HGNC Symbol;Acc:HGNC:31136]	-
ENSG00000152642	163.27	323.717	-0.978304	2.57e-05	0.000350561	GPD1L	3	32105689	32168713	+	4802	protein_coding	glycerol-3-phosphate dehydrogenase 1 like [Source:HGNC Symbol;Acc:HGNC:28956]	-
ENSG00000147872	1222.33	556.321	1.13692	2.59e-05	0.000353034	PLIN2	9	19108375	19149290	-	5086	protein_coding	perilipin 2 [Source:HGNC Symbol;Acc:HGNC:248]	-
ENSG00000171462	142.944	72.3374	0.974177	2.6e-05	0.000353145	DLK2	6	43450352	43456632	-	2236	protein_coding	delta like non-canonical Notch ligand 2 [Source:HGNC Symbol;Acc:HGNC:21113]	-
ENSG00000167565	386.36	185.535	1.062	2.6e-05	0.000353521	SERTAD3	19	40440844	40444705	-	2218	protein_coding	SERTA domain containing 3 [Source:HGNC Symbol;Acc:HGNC:17931]	-
ENSG00000196141	2800.36	1938.64	0.531369	2.62e-05	0.000355467	SPATS2L	2	200305881	200482263	+	10437	protein_coding	spermatogenesis associated serine rich 2 like [Source:HGNC Symbol;Acc:HGNC:24574]	-
ENSG00000167861	247.666	159.453	0.631853	2.63e-05	0.000357207	HID1	17	74950743	74973166	-	6196	protein_coding	HID1 domain containing [Source:HGNC Symbol;Acc:HGNC:15736]	-
ENSG00000123358	173.203	70.2295	1.30676	2.63e-05	0.000357207	NR4A1	12	52022832	52059507	+	7295	protein_coding	nuclear receptor subfamily 4 group A member 1 [Source:HGNC Symbol;Acc:HGNC:7980]	NGFIB-like
ENSG00000143384	4021.57	2292.03	0.811622	2.64e-05	0.000357438	MCL1	1	150574551	150579738	-	4371	protein_coding	MCL1, BCL2 family apoptosis regulator [Source:HGNC Symbol;Acc:HGNC:6943]	-
ENSG00000102007	1283.03	775.587	0.725606	2.64e-05	0.000357652	PLP2	X	49171926	49175239	+	1279	protein_coding	proteolipid protein 2 [Source:HGNC Symbol;Acc:HGNC:9087]	-
ENSG00000129990	47.0114	10.8246	2.12606	2.65e-05	0.000358441	SYT5	19	55171199	55180441	-	5347	protein_coding	synaptotagmin 5 [Source:HGNC Symbol;Acc:HGNC:11513]	-
ENSG00000198355	1069.99	621.253	0.782671	2.66e-05	0.000359554	PIM3	22	49960513	49964080	+	2461	protein_coding	Pim-3 proto-oncogene, serine/threonine kinase [Source:HGNC Symbol;Acc:HGNC:19310]	-
ENSG00000109586	556.727	1102.29	-0.982538	2.71e-05	0.000366576	GALNT7	4	173168753	173323967	+	6865	protein_coding	polypeptide N-acetylgalactosaminyltransferase 7 [Source:HGNC Symbol;Acc:HGNC:4129]	-
ENSG00000187608	825.965	474.539	0.800677	2.71e-05	0.000366576	ISG15	1	1001138	1014540	+	941	protein_coding	ISG15 ubiquitin-like modifier [Source:HGNC Symbol;Acc:HGNC:4053]	-
ENSG00000169087	264.61	130.991	1.01876	2.72e-05	0.000367039	HSPBAP1	3	122740003	122793824	-	5434	protein_coding	HSPB1 associated protein 1 [Source:HGNC Symbol;Acc:HGNC:16389]	-
ENSG00000157657	76.932	162.487	-1.08949	2.74e-05	0.000369243	ZNF618	9	113876282	114056591	+	10384	protein_coding	zinc finger protein 618 [Source:HGNC Symbol;Acc:HGNC:29416]	zf-C2H2
ENSG00000164402	527.688	769.091	-0.542681	2.76e-05	0.000371602	2021-09-08	5	132750817	132807241	-	7711	protein_coding	septin 8 [Source:HGNC Symbol;Acc:HGNC:16511]	-
ENSG00000218358	42.6197	19.1724	1.15976	2.78e-05	0.000374887	RAET1K	6	149998019	150005157	-	1896	transcribed_unprocessed_pseudogene	retinoic acid early transcript 1K pseudogene [Source:HGNC Symbol;Acc:HGNC:16797]	-
ENSG00000135926	590.24	321.581	0.873059	2.78e-05	0.000374887	TMBIM1	2	218274192	218292586	-	5098	protein_coding	transmembrane BAX inhibitor motif containing 1 [Source:HGNC Symbol;Acc:HGNC:23410]	-
ENSG00000171155	100.162	198.353	-0.989654	2.79e-05	0.000375443	C1GALT1C1	X	120625793	120630150	-	1785	protein_coding	C1GALT1 specific chaperone 1 [Source:HGNC Symbol;Acc:HGNC:24338]	-
ENSG00000146677	83.3408	37.9746	1.13827	2.82e-05	0.000379028	AC004453.1	7	44467897	44468304	+	408	processed_pseudogene	ribosomal protein L32 (RPL32) pseudogene	-
ENSG00000261221	468.055	186.178	1.3271	2.85e-05	0.000383019	ZNF865	19	55605405	55617269	+	4005	protein_coding	zinc finger protein 865 [Source:HGNC Symbol;Acc:HGNC:38705]	zf-C2H2
ENSG00000176396	143.508	239.385	-0.736192	2.89e-05	0.000387552	EID2	19	39538705	39540333	-	1629	protein_coding	EP300 interacting inhibitor of differentiation 2 [Source:HGNC Symbol;Acc:HGNC:28292]	-
ENSG00000241399	23.8831	67.7936	-1.47898	2.89e-05	0.000387552	CD302	2	159768630	159798255	-	4075	protein_coding	CD302 molecule [Source:HGNC Symbol;Acc:HGNC:30843]	-
ENSG00000118680	2636.84	1762.13	0.582208	2.89e-05	0.000387552	MYL12B	18	3261479	3278431	+	1932	protein_coding	myosin light chain 12B [Source:HGNC Symbol;Acc:HGNC:29827]	-
ENSG00000206527	393.842	770.185	-0.963529	2.89e-05	0.000387686	HACD2	3	123490820	123585185	-	5351	protein_coding	3-hydroxyacyl-CoA dehydratase 2 [Source:HGNC Symbol;Acc:HGNC:9640]	-
ENSG00000162222	303.226	188.122	0.684119	2.9e-05	0.000389262	TTC9C	11	62728069	62740293	+	2657	protein_coding	tetratricopeptide repeat domain 9C [Source:HGNC Symbol;Acc:HGNC:28432]	-
ENSG00000283236	9.66654	39.0216	-1.94795	2.91e-05	0.000389676	AC074141.1	19	51860242	51863236	-	2995	transcribed_unprocessed_pseudogene	novel zinc finger protein pseudogene	-
ENSG00000142173	1902.46	1081.33	0.815909	2.92e-05	0.000390459	COL6A2	21	46098097	46132849	+	5386	protein_coding	collagen type VI alpha 2 chain [Source:HGNC Symbol;Acc:HGNC:2212]	-
ENSG00000172183	307.903	94.2144	1.71108	2.92e-05	0.000390459	ISG20	15	88636153	88656483	+	7363	protein_coding	interferon stimulated exonuclease gene 20 [Source:HGNC Symbol;Acc:HGNC:6130]	-
ENSG00000152443	174.439	330.885	-0.922482	2.93e-05	0.000392351	ZNF776	19	57746796	57758159	+	5484	protein_coding	zinc finger protein 776 [Source:HGNC Symbol;Acc:HGNC:26765]	zf-C2H2
ENSG00000142546	1460.36	1037.05	0.494349	2.94e-05	0.000392676	NOSIP	19	49555711	49590262	-	4248	protein_coding	nitric oxide synthase interacting protein [Source:HGNC Symbol;Acc:HGNC:17946]	-
ENSG00000167034	91.3783	33.6928	1.42517	2.98e-05	0.000398028	NKX3-1	8	23678693	23682927	-	3271	protein_coding	NK3 homeobox 1 [Source:HGNC Symbol;Acc:HGNC:7838]	Homeobox
ENSG00000166741	267.339	65.054	2.035	2.99e-05	0.000398925	NNMT	11	114257787	114313285	+	2919	protein_coding	nicotinamide N-methyltransferase [Source:HGNC Symbol;Acc:HGNC:7861]	-
ENSG00000070423	1274.24	575.232	1.14618	2.99e-05	0.000398925	RNF126	19	647526	663277	-	3496	protein_coding	ring finger protein 126 [Source:HGNC Symbol;Acc:HGNC:21151]	-
ENSG00000254093	300.559	175.923	0.7681	3e-05	0.000399653	PINX1	8	10764963	10839884	-	2802	protein_coding	PIN2 (TERF1) interacting telomerase inhibitor 1 [Source:HGNC Symbol;Acc:HGNC:30046]	-
ENSG00000243679	48.2488	19.4659	1.32268	3e-05	0.000399887	AC018638.5	7	128653969	128654722	+	754	processed_pseudogene	novel pseudogene	-
ENSG00000196950	331.976	848.463	-1.34998	3.01e-05	0.000400442	SLC39A10	2	195575977	195737702	+	6917	protein_coding	solute carrier family 39 member 10 [Source:HGNC Symbol;Acc:HGNC:20861]	-
ENSG00000092847	454.074	672.35	-0.567129	3.02e-05	0.000401762	AGO1	1	35869808	35930528	+	13886	protein_coding	argonaute 1, RISC catalytic component [Source:HGNC Symbol;Acc:HGNC:3262]	-
ENSG00000168610	1255.26	959.223	0.388763	3.03e-05	0.000402235	STAT3	17	42313324	42388568	-	8812	protein_coding	signal transducer and activator of transcription 3 [Source:HGNC Symbol;Acc:HGNC:11364]	STAT
ENSG00000146842	279.077	462.226	-0.728795	3.05e-05	0.000405206	TMEM209	7	130164715	130207770	-	4759	protein_coding	transmembrane protein 209 [Source:HGNC Symbol;Acc:HGNC:21898]	-
ENSG00000180440	16.882	70.7835	-2.03024	3.07e-05	0.000407744	SERTM1	13	36673912	36697839	+	3207	protein_coding	serine rich and transmembrane domain containing 1 [Source:HGNC Symbol;Acc:HGNC:33792]	-
ENSG00000224184	30.0684	9.13157	1.72356	3.08e-05	0.000408221	MIR3681HG	2	11848622	12578348	+	3876	lincRNA	MIR3681 host gene [Source:HGNC Symbol;Acc:HGNC:52001]	-
ENSG00000264345	12.1909	33.282	-1.47377	3.08e-05	0.000408405	LINC01894	18	24933487	24987682	-	564	lincRNA	long intergenic non-protein coding RNA 1894 [Source:HGNC Symbol;Acc:HGNC:52713]	-
ENSG00000007944	193.764	116.498	0.736492	3.09e-05	0.000410076	MYLIP	6	16129125	16148248	+	3033	protein_coding	myosin regulatory light chain interacting protein [Source:HGNC Symbol;Acc:HGNC:21155]	-
ENSG00000171720	837.48	561.07	0.580096	3.11e-05	0.000411399	HDAC3	5	141620876	141636870	-	4631	protein_coding	histone deacetylase 3 [Source:HGNC Symbol;Acc:HGNC:4854]	-
ENSG00000197177	27.8872	59.1625	-1.11043	3.11e-05	0.00041183	ADGRA1	10	133070929	133131675	+	6503	protein_coding	adhesion G protein-coupled receptor A1 [Source:HGNC Symbol;Acc:HGNC:13838]	-
ENSG00000134013	767.033	441.384	0.795561	3.17e-05	0.000419134	LOXL2	8	23297189	23425328	-	5707	protein_coding	lysyl oxidase like 2 [Source:HGNC Symbol;Acc:HGNC:6666]	-
ENSG00000129946	379.464	190.675	0.992126	3.17e-05	0.000419277	SHC2	19	416583	460996	-	4131	protein_coding	SHC adaptor protein 2 [Source:HGNC Symbol;Acc:HGNC:29869]	-
ENSG00000165732	3043.83	4346.4	-0.513601	3.18e-05	0.000420258	DDX21	10	68956128	68985073	+	5020	protein_coding	DExD-box helicase 21 [Source:HGNC Symbol;Acc:HGNC:2744]	-
ENSG00000166446	61.9978	29.4954	1.08253	3.19e-05	0.000420661	CDYL2	16	80597906	80804329	-	8557	protein_coding	chromodomain Y like 2 [Source:HGNC Symbol;Acc:HGNC:23030]	-
ENSG00000160752	652.529	1098.13	-0.753073	3.21e-05	0.000423286	FDPS	1	155308748	155320666	+	3718	protein_coding	farnesyl diphosphate synthase [Source:HGNC Symbol;Acc:HGNC:3631]	-
ENSG00000159921	343.037	502.985	-0.548805	3.22e-05	0.00042497	GNE	9	36214441	36277056	-	5921	protein_coding	glucosamine (UDP-N-acetyl)-2-epimerase/N-acetylmannosamine kinase [Source:HGNC Symbol;Acc:HGNC:23657]	-
ENSG00000130203	132.395	69.2892	0.928123	3.23e-05	0.000425878	APOE	19	44905754	44909393	+	2191	protein_coding	apolipoprotein E [Source:HGNC Symbol;Acc:HGNC:613]	-
ENSG00000175894	96.1471	13.2167	2.86756	3.26e-05	0.000429475	TSPEAR	21	44497892	44711580	-	4471	protein_coding	thrombospondin type laminin G domain and EAR repeats [Source:HGNC Symbol;Acc:HGNC:1268]	-
ENSG00000266967	6.75143	25.7252	-1.90615	3.29e-05	0.000432577	AARSD1	17	42950526	42964498	-	3704	protein_coding	alanyl-tRNA synthetase domain containing 1 [Source:HGNC Symbol;Acc:HGNC:28417]	-
ENSG00000119688	469.179	334.549	0.486021	3.29e-05	0.000433464	ABCD4	14	74285423	74303056	-	8769	protein_coding	ATP binding cassette subfamily D member 4 [Source:HGNC Symbol;Acc:HGNC:68]	-
ENSG00000089335	298.493	575.071	-0.940982	3.31e-05	0.000435236	ZNF302	19	34677639	34686397	+	5032	protein_coding	zinc finger protein 302 [Source:HGNC Symbol;Acc:HGNC:13848]	zf-C2H2
ENSG00000171517	491.23	664.241	-0.438081	3.33e-05	0.000436986	LPAR3	1	84811602	84893213	-	3543	protein_coding	lysophosphatidic acid receptor 3 [Source:HGNC Symbol;Acc:HGNC:14298]	-
ENSG00000101104	543.004	300.506	0.856506	3.35e-05	0.000439509	PABPC1L	20	44910062	44959035	+	4984	protein_coding	poly(A) binding protein cytoplasmic 1 like [Source:HGNC Symbol;Acc:HGNC:15797]	-
ENSG00000173706	221.944	365.019	-0.713257	3.35e-05	0.000439747	HEG1	3	124965710	125055958	-	9925	protein_coding	heart development protein with EGF like domains 1 [Source:HGNC Symbol;Acc:HGNC:29227]	-
ENSG00000257354	13.3872	48.5183	-1.90748	3.36e-05	0.000440611	AC048341.1	12	62602752	62622213	+	8693	lincRNA	novel transcript	-
ENSG00000178965	21.6707	2.18601	3.32669	3.37e-05	0.000441912	ERICH3	1	74568111	74673738	-	8779	protein_coding	glutamate rich 3 [Source:HGNC Symbol;Acc:HGNC:25346]	-
ENSG00000071205	595.377	311.078	0.933615	3.37e-05	0.000442156	ARHGAP10	4	147732063	148072780	+	10759	protein_coding	Rho GTPase activating protein 10 [Source:HGNC Symbol;Acc:HGNC:26099]	-
ENSG00000159023	685.589	969.549	-0.500659	3.38e-05	0.000442746	EPB41	1	28887091	29120046	+	19993	protein_coding	erythrocyte membrane protein band 4.1 [Source:HGNC Symbol;Acc:HGNC:3377]	-
ENSG00000114302	812.201	1279.5	-0.657713	3.39e-05	0.000443967	PRKAR2A	3	48744597	48847846	-	6644	protein_coding	protein kinase cAMP-dependent type II regulatory subunit alpha [Source:HGNC Symbol;Acc:HGNC:9391]	-
ENSG00000110324	72.5582	28.7594	1.34035	3.4e-05	0.000444139	IL10RA	11	117986348	118003037	+	8102	protein_coding	interleukin 10 receptor subunit alpha [Source:HGNC Symbol;Acc:HGNC:5964]	-
ENSG00000162373	69.8633	7.7421	3.18207	3.4e-05	0.000444139	BEND5	1	48727523	48776969	-	2138	protein_coding	BEN domain containing 5 [Source:HGNC Symbol;Acc:HGNC:25668]	-
ENSG00000105701	2232.48	1549.13	0.526993	3.4e-05	0.000444155	FKBP8	19	18531751	18544077	-	2902	protein_coding	FK506 binding protein 8 [Source:HGNC Symbol;Acc:HGNC:3724]	-
ENSG00000133863	114.624	679.694	-2.56228	3.4e-05	0.000444155	TEX15	8	30831544	30913003	-	11864	protein_coding	testis expressed 15, meiosis and synapsis associated [Source:HGNC Symbol;Acc:HGNC:11738]	-
ENSG00000176842	148.41	85.6006	0.792894	3.43e-05	0.000447511	IRX5	16	54930862	54934485	+	2845	protein_coding	iroquois homeobox 5 [Source:HGNC Symbol;Acc:HGNC:14361]	Homeobox
ENSG00000136160	216.966	97.0682	1.16706	3.46e-05	0.000450553	EDNRB	13	77895481	77975529	-	5607	protein_coding	endothelin receptor type B [Source:HGNC Symbol;Acc:HGNC:3180]	-
ENSG00000011426	1159.54	2750	-1.24473	3.48e-05	0.000453896	ANLN	7	36389806	36453791	+	6012	protein_coding	anillin actin binding protein [Source:HGNC Symbol;Acc:HGNC:14082]	-
ENSG00000158528	310.763	531.615	-0.770121	3.49e-05	0.000454931	PPP1R9A	7	94907202	95296415	+	11151	protein_coding	protein phosphatase 1 regulatory subunit 9A [Source:HGNC Symbol;Acc:HGNC:14946]	-
ENSG00000198346	95.2647	162.233	-0.756963	3.51e-05	0.000456059	ZNF813	19	53467735	53496255	+	6244	protein_coding	zinc finger protein 813 [Source:HGNC Symbol;Acc:HGNC:33257]	zf-C2H2
ENSG00000117461	222.198	425.333	-0.929687	3.51e-05	0.000456059	PIK3R3	1	46040140	46133036	-	7410	protein_coding	phosphoinositide-3-kinase regulatory subunit 3 [Source:HGNC Symbol;Acc:HGNC:8981]	-
ENSG00000280927	4.74362	22.7797	-2.27242	3.51e-05	0.000456059	CTBP1-AS	4	1210120	1218591	+	3886	antisense	CTBP1 antisense RNA [Source:HGNC Symbol;Acc:HGNC:48337]	-
ENSG00000183691	474.651	154.829	1.61828	3.51e-05	0.000456432	NOG	17	56593699	56595590	+	1892	protein_coding	noggin [Source:HGNC Symbol;Acc:HGNC:7866]	-
ENSG00000163374	981.163	599.999	0.708076	3.52e-05	0.000457051	YY1AP1	1	155659443	155689000	-	5001	protein_coding	YY1 associated protein 1 [Source:HGNC Symbol;Acc:HGNC:30935]	-
ENSG00000149485	1007.48	1372	-0.445582	3.54e-05	0.000459512	FADS1	11	61799625	61829318	-	10230	protein_coding	fatty acid desaturase 1 [Source:HGNC Symbol;Acc:HGNC:3574]	-
ENSG00000165097	273.17	483.122	-0.816852	3.54e-05	0.000459516	KDM1B	6	18155329	18223853	+	5596	protein_coding	lysine demethylase 1B [Source:HGNC Symbol;Acc:HGNC:21577]	-
ENSG00000116586	501.176	330.507	0.596908	3.55e-05	0.000459516	LAMTOR2	1	156054752	156058510	+	1438	protein_coding	late endosomal/lysosomal adaptor, MAPK and MTOR activator 2 [Source:HGNC Symbol;Acc:HGNC:29796]	-
ENSG00000151474	209.028	120.09	0.796619	3.55e-05	0.000459551	FRMD4A	10	13643706	14462142	-	14646	protein_coding	FERM domain containing 4A [Source:HGNC Symbol;Acc:HGNC:25491]	-
ENSG00000164885	121.851	198.686	-0.71559	3.55e-05	0.000459755	CDK5	7	151053812	151058530	-	2938	protein_coding	cyclin dependent kinase 5 [Source:HGNC Symbol;Acc:HGNC:1774]	-
ENSG00000215146	81.0173	327.32	-2.00421	3.57e-05	0.000461424	BX322639.1	10	42331866	42367974	-	7208	transcribed_unprocessed_pseudogene	zinc finger protein 91 pseudogene [Source:NCBI gene;Acc:441666]	-
ENSG00000237296	404.255	222.977	0.856688	3.57e-05	0.000461424	SMG1P1	16	22437008	22492220	+	7046	transcribed_unprocessed_pseudogene	SMG1 pseudogene 1 [Source:HGNC Symbol;Acc:HGNC:44186]	-
ENSG00000114251	414.67	652.583	-0.657436	3.58e-05	0.000462945	WNT5A	3	55465715	55490539	-	7397	protein_coding	Wnt family member 5A [Source:HGNC Symbol;Acc:HGNC:12784]	-
ENSG00000188021	187.572	305.474	-0.705623	3.59e-05	0.000463569	UBQLN2	X	56563639	56567868	+	4230	protein_coding	ubiquilin 2 [Source:HGNC Symbol;Acc:HGNC:12509]	-
ENSG00000131844	958.517	1408.38	-0.555353	3.59e-05	0.000463847	MCCC2	5	71587288	71658704	+	6034	protein_coding	methylcrotonoyl-CoA carboxylase 2 [Source:HGNC Symbol;Acc:HGNC:6937]	-
ENSG00000166803	249.437	373.97	-0.584896	3.61e-05	0.000465539	PCLAF	15	64364311	64387687	-	3734	protein_coding	PCNA clamp associated factor [Source:HGNC Symbol;Acc:HGNC:28961]	-
ENSG00000150281	68.3795	34.4575	0.992019	3.64e-05	0.000468744	CTF1	16	30896607	30903560	+	1664	protein_coding	cardiotrophin 1 [Source:HGNC Symbol;Acc:HGNC:2499]	-
ENSG00000111371	1919.29	3470.04	-0.853433	3.64e-05	0.000468744	SLC38A1	12	46183063	46270017	-	10015	protein_coding	solute carrier family 38 member 1 [Source:HGNC Symbol;Acc:HGNC:13447]	-
ENSG00000136943	279.292	521.85	-0.896235	3.65e-05	0.000470091	CTSV	9	97029679	97039643	-	4700	protein_coding	cathepsin V [Source:HGNC Symbol;Acc:HGNC:2538]	-
ENSG00000186866	444.735	232.888	0.929524	3.66e-05	0.000470311	POFUT2	21	45263928	45287898	-	5862	protein_coding	protein O-fucosyltransferase 2 [Source:HGNC Symbol;Acc:HGNC:14683]	-
ENSG00000118246	405.092	760.468	-0.907214	3.66e-05	0.000470455	FASTKD2	2	206765357	206792509	+	6079	protein_coding	FAST kinase domains 2 [Source:HGNC Symbol;Acc:HGNC:29160]	-
ENSG00000196998	522.991	306.174	0.769528	3.66e-05	0.00047048	WDR45	X	49071470	49101170	-	5452	protein_coding	WD repeat domain 45 [Source:HGNC Symbol;Acc:HGNC:28912]	-
ENSG00000196923	1179.38	750.551	0.65242	3.68e-05	0.000472242	PDLIM7	5	177483394	177497606	-	4407	protein_coding	PDZ and LIM domain 7 [Source:HGNC Symbol;Acc:HGNC:22958]	-
ENSG00000198908	41.6137	96.4693	-1.1964	3.68e-05	0.000472735	BHLHB9	X	102720688	102753540	+	5518	protein_coding	basic helix-loop-helix family member b9 [Source:HGNC Symbol;Acc:HGNC:29353]	-
ENSG00000137815	359.555	499.036	-0.475423	3.69e-05	0.000473425	RTF1	15	41408408	41483563	+	5770	protein_coding	RTF1 homolog, Paf1/RNA polymerase II complex component [Source:HGNC Symbol;Acc:HGNC:28996]	-
ENSG00000106624	1160.44	727.983	0.673613	3.69e-05	0.000473425	AEBP1	7	44104361	44114562	+	4955	protein_coding	AE binding protein 1 [Source:HGNC Symbol;Acc:HGNC:303]	-
ENSG00000161277	126.867	54.9223	1.21378	3.7e-05	0.000474645	THAP8	19	36034985	36054762	-	1825	protein_coding	THAP domain containing 8 [Source:HGNC Symbol;Acc:HGNC:23191]	THAP
ENSG00000198894	166.92	286.482	-0.771238	3.71e-05	0.000475197	CIPC	14	77098097	77117287	+	5300	protein_coding	CLOCK interacting pacemaker [Source:HGNC Symbol;Acc:HGNC:20365]	-
ENSG00000245910	1864.62	1122.14	0.732808	3.72e-05	0.000476345	SNHG6	8	66921684	66926398	-	1247	processed_transcript	small nucleolar RNA host gene 6 [Source:HGNC Symbol;Acc:HGNC:32965]	-
ENSG00000183196	215.391	354.817	-0.714584	3.74e-05	0.000478274	CHST6	16	75472052	75495445	-	8620	protein_coding	carbohydrate sulfotransferase 6 [Source:HGNC Symbol;Acc:HGNC:6938]	-
ENSG00000179627	118.85	233.592	-0.985612	3.77e-05	0.000481572	ZBTB42	14	104800596	104804712	+	3905	protein_coding	zinc finger and BTB domain containing 42 [Source:HGNC Symbol;Acc:HGNC:32550]	ZBTB
ENSG00000183598	33.5137	2.41901	3.78316	3.79e-05	0.000484325	HIST2H3D	1	149813271	149813681	-	411	protein_coding	histone cluster 2 H3 family member d [Source:HGNC Symbol;Acc:HGNC:25311]	-
ENSG00000171262	223.36	346.338	-0.627234	3.81e-05	0.000486833	FAM98B	15	38454127	38487710	+	6851	protein_coding	family with sequence similarity 98 member B [Source:HGNC Symbol;Acc:HGNC:26773]	-
ENSG00000138185	17.0227	64.6805	-1.88838	3.82e-05	0.000486833	ENTPD1	10	95711779	95869695	+	6975	protein_coding	ectonucleoside triphosphate diphosphohydrolase 1 [Source:HGNC Symbol;Acc:HGNC:3363]	-
ENSG00000141562	834.989	466.05	0.843402	3.84e-05	0.00048998	NARF	17	82458180	82490537	+	7962	protein_coding	nuclear prelamin A recognition factor [Source:HGNC Symbol;Acc:HGNC:29916]	-
ENSG00000152192	79.7854	156.179	-0.985065	3.85e-05	0.000490427	POU4F1	13	78598362	78603560	-	4547	protein_coding	POU class 4 homeobox 1 [Source:HGNC Symbol;Acc:HGNC:9218]	Pou
ENSG00000167173	599.789	280.262	1.09532	3.85e-05	0.00049055	C15orf39	15	75195643	75212169	+	5812	protein_coding	chromosome 15 open reading frame 39 [Source:HGNC Symbol;Acc:HGNC:24497]	-
ENSG00000181754	211.435	402.325	-0.934938	3.86e-05	0.000490945	AMIGO1	1	109504175	109509738	-	5144	protein_coding	adhesion molecule with Ig like domain 1 [Source:HGNC Symbol;Acc:HGNC:20824]	-
ENSG00000081386	320.66	497.734	-0.632063	3.91e-05	0.000497053	ZNF510	9	96755865	96778129	-	5921	protein_coding	zinc finger protein 510 [Source:HGNC Symbol;Acc:HGNC:29161]	zf-C2H2
ENSG00000218226	19.9392	63.2007	-1.70772	3.91e-05	0.000497053	TATDN2P2	6	158609706	158621636	-	2226	processed_pseudogene	TatD DNase domain containing 2 pseudogene 2 [Source:HGNC Symbol;Acc:HGNC:39255]	-
ENSG00000144048	613.249	399.778	0.617528	3.92e-05	0.000498727	DUSP11	2	73762184	73780157	-	3544	protein_coding	dual specificity phosphatase 11 [Source:HGNC Symbol;Acc:HGNC:3066]	-
ENSG00000187607	196.759	346.128	-0.810377	3.95e-05	0.000501757	ZNF286A	17	15699577	15720787	+	6754	protein_coding	zinc finger protein 286A [Source:HGNC Symbol;Acc:HGNC:13501]	zf-C2H2
ENSG00000151748	642.401	342.158	0.911543	3.97e-05	0.000504338	SAV1	14	50632058	50668331	-	5630	protein_coding	salvador family WW domain containing protein 1 [Source:HGNC Symbol;Acc:HGNC:17795]	-
ENSG00000197013	57.8858	115.582	-0.989489	4.04e-05	0.000512009	ZNF429	19	21496682	21556270	+	5054	protein_coding	zinc finger protein 429 [Source:HGNC Symbol;Acc:HGNC:20817]	zf-C2H2
ENSG00000152683	455.708	730.246	-0.676937	4.04e-05	0.000512423	SLC30A6	2	32165841	32224379	+	5410	protein_coding	solute carrier family 30 member 6 [Source:HGNC Symbol;Acc:HGNC:19305]	-
ENSG00000171224	176.352	113.489	0.639678	4.07e-05	0.00051613	FAM241B	10	69630251	69633599	+	1349	protein_coding	family with sequence similarity 241 member B [Source:HGNC Symbol;Acc:HGNC:23519]	-
ENSG00000105220	5346.58	3002.81	0.832624	4.11e-05	0.000520515	GPI	19	34359480	34402413	+	10680	protein_coding	glucose-6-phosphate isomerase [Source:HGNC Symbol;Acc:HGNC:4458]	-
ENSG00000257621	150.33	330.178	-1.12576	4.13e-05	0.000522192	PSMA3-AS1	14	58265365	58298134	-	7409	antisense	PSMA3 antisense RNA 1 [Source:HGNC Symbol;Acc:HGNC:26445]	-
ENSG00000127325	10.4884	49.7988	-2.19923	4.14e-05	0.000523776	BEST3	12	69643360	69699476	-	6863	protein_coding	bestrophin 3 [Source:HGNC Symbol;Acc:HGNC:17105]	-
ENSG00000163064	100.995	46.5419	1.12703	4.14e-05	0.000523803	EN1	2	118842171	118847678	-	2886	protein_coding	engrailed homeobox 1 [Source:HGNC Symbol;Acc:HGNC:3342]	Homeobox
ENSG00000149948	1829.47	2876.01	-0.651557	4.17e-05	0.000526468	HMGA2	12	65824131	65966295	+	15403	protein_coding	high mobility group AT-hook 2 [Source:HGNC Symbol;Acc:HGNC:5009]	HMGI/HMGY
ENSG00000125430	288.862	149.826	0.951828	4.17e-05	0.000526498	HS3ST3B1	17	14301083	14349404	+	5367	protein_coding	heparan sulfate-glucosamine 3-sulfotransferase 3B1 [Source:HGNC Symbol;Acc:HGNC:5198]	-
ENSG00000135480	18.2401	4.61228	2.00766	4.21e-05	0.000530988	KRT7	12	52232520	52252186	+	4093	protein_coding	keratin 7 [Source:HGNC Symbol;Acc:HGNC:6445]	-
ENSG00000236921	69.1289	17.5706	1.98975	4.23e-05	0.000533768	AL157937.1	9	22203990	22214672	-	443	lincRNA	novel transcript	-
ENSG00000129355	218.37	104.541	1.0645	4.24e-05	0.000534211	CDKN2D	19	10566462	10569059	-	1503	protein_coding	cyclin dependent kinase inhibitor 2D [Source:HGNC Symbol;Acc:HGNC:1790]	-
ENSG00000189334	10.7158	1.10216	3.25885	4.24e-05	0.000534557	S100A14	1	153614255	153616986	-	1277	protein_coding	S100 calcium binding protein A14 [Source:HGNC Symbol;Acc:HGNC:18901]	-
ENSG00000151806	323.18	590.062	-0.864603	4.27e-05	0.000537263	GUF1	4	44678427	44700926	+	4454	protein_coding	GUF1 homolog, GTPase [Source:HGNC Symbol;Acc:HGNC:25799]	-
ENSG00000155363	1523.22	1070.16	0.508276	4.27e-05	0.000537614	MOV10	1	112673141	112700746	+	6509	protein_coding	Mov10 RISC complex RNA helicase [Source:HGNC Symbol;Acc:HGNC:7200]	-
ENSG00000164134	1045.59	1914.37	-0.871343	4.28e-05	0.000538746	NAA15	4	139301455	139420033	+	9712	protein_coding	N(alpha)-acetyltransferase 15, NatA auxiliary subunit [Source:HGNC Symbol;Acc:HGNC:30782]	-
ENSG00000162396	208.873	96.5804	1.1063	4.29e-05	0.000539145	PARS2	1	54756898	54764514	-	2347	protein_coding	prolyl-tRNA synthetase 2, mitochondrial [Source:HGNC Symbol;Acc:HGNC:30563]	-
ENSG00000163162	902.985	478.208	0.918964	4.31e-05	0.000541342	RNF149	2	101271219	101308701	-	4836	protein_coding	ring finger protein 149 [Source:HGNC Symbol;Acc:HGNC:23137]	-
ENSG00000110321	7164.25	10141.2	-0.501314	4.33e-05	0.000542921	EIF4G2	11	10797050	10809110	-	8655	protein_coding	eukaryotic translation initiation factor 4 gamma 2 [Source:HGNC Symbol;Acc:HGNC:3297]	-
ENSG00000124942	3066.79	1957.6	0.647868	4.4e-05	0.000551425	AHNAK	11	62433542	62556235	-	19465	protein_coding	AHNAK nucleoprotein [Source:HGNC Symbol;Acc:HGNC:347]	-
ENSG00000197948	185.853	109.263	0.762433	4.43e-05	0.000555975	FCHSD1	5	141639302	141651419	-	6073	protein_coding	FCH and double SH3 domains 1 [Source:HGNC Symbol;Acc:HGNC:25463]	-
ENSG00000126603	234.02	105.719	1.14743	4.45e-05	0.000557085	GLIS2	16	4314761	4339597	+	4469	protein_coding	GLIS family zinc finger 2 [Source:HGNC Symbol;Acc:HGNC:29450]	zf-C2H2
ENSG00000072415	346.67	580.869	-0.740378	4.45e-05	0.000557085	MPP5	14	67241109	67335819	+	8743	protein_coding	membrane palmitoylated protein 5 [Source:HGNC Symbol;Acc:HGNC:18669]	-
ENSG00000278864	9.87858	43.5508	-2.21359	4.46e-05	0.000558137	AC055811.4	17	17181504	17183257	+	1754	TEC	novel transcript	-
ENSG00000168710	1210.77	1630.89	-0.430321	4.47e-05	0.00055934	AHCYL1	1	109984686	110023741	+	5113	protein_coding	adenosylhomocysteinase like 1 [Source:HGNC Symbol;Acc:HGNC:344]	-
ENSG00000163932	474.605	264.44	0.847183	4.48e-05	0.000560139	PRKCD	3	53156009	53192717	+	3396	protein_coding	protein kinase C delta [Source:HGNC Symbol;Acc:HGNC:9399]	-
ENSG00000249096	24.6043	8.65274	1.51121	4.49e-05	0.000560837	LINC02362	4	184365183	184382306	-	2767	lincRNA	long intergenic non-protein coding RNA 2362 [Source:HGNC Symbol;Acc:HGNC:53284]	-
ENSG00000198768	5.30107	0	5.70481	4.49e-05	0.000561193	APCDD1L	20	58459101	58515131	-	3942	protein_coding	APC down-regulated 1 like [Source:HGNC Symbol;Acc:HGNC:26892]	-
ENSG00000139112	892.521	534.944	0.740124	4.51e-05	0.00056274	GABARAPL1	12	10212458	10223130	+	4086	protein_coding	GABA type A receptor associated protein like 1 [Source:HGNC Symbol;Acc:HGNC:4068]	-
ENSG00000260804	27.2783	88.8739	-1.67601	4.52e-05	0.00056354	LINC01963	2	216217045	216220192	+	3148	lincRNA	long intergenic non-protein coding RNA 1963 [Source:HGNC Symbol;Acc:HGNC:25283]	-
ENSG00000127616	3628.19	2427.7	0.579337	4.52e-05	0.000563612	SMARCA4	19	10960825	11079426	+	15778	protein_coding	SWI/SNF related, matrix associated, actin dependent regulator of chromatin, subfamily a, member 4 [Source:HGNC Symbol;Acc:HGNC:11100]	-
ENSG00000125968	924.928	352.146	1.39452	4.53e-05	0.000564267	ID1	20	31605283	31606515	+	1233	protein_coding	inhibitor of DNA binding 1, HLH protein [Source:HGNC Symbol;Acc:HGNC:5360]	bHLH
ENSG00000153487	242.615	100.619	1.27467	4.53e-05	0.000564267	ING1	13	110712736	110723339	+	6388	protein_coding	inhibitor of growth family member 1 [Source:HGNC Symbol;Acc:HGNC:6062]	-
ENSG00000101335	281.031	178.905	0.654227	4.55e-05	0.000566572	MYL9	20	36541484	36551447	+	2821	protein_coding	myosin light chain 9 [Source:HGNC Symbol;Acc:HGNC:15754]	-
ENSG00000182749	74.5729	32.9378	1.18058	4.56e-05	0.000567016	PAQR7	1	25861210	25871253	-	3297	protein_coding	progestin and adipoQ receptor family member 7 [Source:HGNC Symbol;Acc:HGNC:23146]	-
ENSG00000274419	47.1541	20.5069	1.21232	4.56e-05	0.000567016	TBC1D3D	17	38003976	38014902	+	2116	protein_coding	TBC1 domain family member 3D [Source:HGNC Symbol;Acc:HGNC:28944]	-
ENSG00000278705	28.0147	0.765769	5.21006	4.59e-05	0.000569933	HIST1H4B	6	26026815	26027252	-	438	protein_coding	histone cluster 1 H4 family member b [Source:HGNC Symbol;Acc:HGNC:4789]	-
ENSG00000102924	64.7335	129.717	-1.01912	4.6e-05	0.000571167	CBLN1	16	49277917	49281831	-	2594	protein_coding	cerebellin 1 precursor [Source:HGNC Symbol;Acc:HGNC:1543]	-
ENSG00000100078	109.947	263.686	-1.27244	4.61e-05	0.000572071	PLA2G3	22	31134809	31140607	-	2697	protein_coding	phospholipase A2 group III [Source:HGNC Symbol;Acc:HGNC:17934]	-
ENSG00000165672	1572.43	2111.05	-0.424888	4.62e-05	0.000573265	PRDX3	10	119167703	119178833	-	3417	protein_coding	peroxiredoxin 3 [Source:HGNC Symbol;Acc:HGNC:9354]	-
ENSG00000138757	1356.56	2390.56	-0.816048	4.63e-05	0.000573265	G3BP2	4	75642782	75724525	-	7183	protein_coding	G3BP stress granule assembly factor 2 [Source:HGNC Symbol;Acc:HGNC:30291]	-
ENSG00000085185	232.005	129.252	0.838135	4.63e-05	0.000573464	BCORL1	X	129981107	130058083	+	7996	protein_coding	BCL6 corepressor like 1 [Source:HGNC Symbol;Acc:HGNC:25657]	-
ENSG00000142541	26944.6	17095.3	0.656428	4.63e-05	0.000573464	RPL13A	19	49487554	49492308	+	2369	protein_coding	ribosomal protein L13a [Source:HGNC Symbol;Acc:HGNC:10304]	-
ENSG00000143756	469.913	300.348	0.648216	4.71e-05	0.000582258	FBXO28	1	224114087	224162047	+	6044	protein_coding	F-box protein 28 [Source:HGNC Symbol;Acc:HGNC:29046]	-
ENSG00000198853	483.156	219.832	1.13297	4.74e-05	0.000585944	RUSC2	9	35490127	35561898	+	5682	protein_coding	RUN and SH3 domain containing 2 [Source:HGNC Symbol;Acc:HGNC:23625]	-
ENSG00000174004	63.177	119.125	-0.92492	4.75e-05	0.000587518	NRROS	3	196639686	196662004	+	2910	protein_coding	negative regulator of reactive oxygen species [Source:HGNC Symbol;Acc:HGNC:24613]	-
ENSG00000105401	3052.71	1958.52	0.639676	4.77e-05	0.000588893	CDC37	19	10391134	10420121	-	3041	protein_coding	cell division cycle 37 [Source:HGNC Symbol;Acc:HGNC:1735]	-
ENSG00000165819	564.364	915.661	-0.701062	4.78e-05	0.000589504	METTL3	14	21498133	21511375	-	5894	protein_coding	methyltransferase like 3 [Source:HGNC Symbol;Acc:HGNC:17563]	-
ENSG00000143622	894.075	551.668	0.698911	4.78e-05	0.000589852	RIT1	1	155897808	155911404	-	3919	protein_coding	Ras like without CAAX 1 [Source:HGNC Symbol;Acc:HGNC:10023]	-
ENSG00000152578	131.412	310.734	-1.23164	4.8e-05	0.000591769	GRIA4	11	105609994	105982092	+	10083	protein_coding	glutamate ionotropic receptor AMPA type subunit 4 [Source:HGNC Symbol;Acc:HGNC:4574]	-
ENSG00000095059	11.3141	38.1436	-1.75331	4.82e-05	0.000593439	DHPS	19	12675717	12681902	-	3006	protein_coding	deoxyhypusine synthase [Source:HGNC Symbol;Acc:HGNC:2869]	-
ENSG00000222041	442.825	280.006	0.656506	4.82e-05	0.000593439	CYTOR	2	87454781	87636740	+	17693	lincRNA	cytoskeleton regulator RNA [Source:HGNC Symbol;Acc:HGNC:28717]	-
ENSG00000130165	683.131	347.83	0.971756	4.84e-05	0.00059544	ELOF1	19	11551147	11559236	-	4173	protein_coding	elongation factor 1 homolog [Source:HGNC Symbol;Acc:HGNC:28691]	-
ENSG00000178562	17.4446	42.489	-1.27302	4.86e-05	0.000597646	CD28	2	203706475	203738912	+	4885	protein_coding	CD28 molecule [Source:HGNC Symbol;Acc:HGNC:1653]	-
ENSG00000056998	105.688	180.696	-0.782655	4.88e-05	0.000600248	GYG2	X	2828788	2882820	+	3655	protein_coding	glycogenin 2 [Source:HGNC Symbol;Acc:HGNC:4700]	-
ENSG00000215154	129.588	48.3355	1.41243	4.93e-05	0.000605164	AC141586.1	16	2603350	2630494	+	2751	transcribed_unprocessed_pseudogene	potassium channel tetramerization domain containing 5 pseudogene [Source:NCBI gene;Acc:652276]	-
ENSG00000120992	1064.88	1426.62	-0.421005	4.97e-05	0.000609967	LYPLA1	8	54046367	54102017	-	4694	protein_coding	lysophospholipase I [Source:HGNC Symbol;Acc:HGNC:6737]	-
ENSG00000007908	24.6277	0.169407	6.95439	4.97e-05	0.000609967	SELE	1	169722641	169764705	-	4585	protein_coding	selectin E [Source:HGNC Symbol;Acc:HGNC:10718]	-
ENSG00000123143	1681.45	1041.31	0.690357	4.99e-05	0.000612014	PKN1	19	14433053	14471867	+	4606	protein_coding	protein kinase N1 [Source:HGNC Symbol;Acc:HGNC:9405]	-
ENSG00000213859	331.929	81.7719	2.02328	5e-05	0.000612723	KCTD11	17	7351889	7354944	+	3056	protein_coding	potassium channel tetramerization domain containing 11 [Source:HGNC Symbol;Acc:HGNC:21302]	-
ENSG00000256671	226.114	47.6251	2.25003	5e-05	0.000612723	LIMS4	2	110446640	110473075	-	2553	protein_coding	LIM zinc finger domain containing 4 [Source:HGNC Symbol;Acc:HGNC:39941]	-
ENSG00000126453	512.176	342.348	0.577395	5.02e-05	0.000614732	BCL2L12	19	49665142	49673916	+	2216	protein_coding	BCL2 like 12 [Source:HGNC Symbol;Acc:HGNC:13787]	-
ENSG00000126458	424.268	181.083	1.23097	5.05e-05	0.000617444	RRAS	19	49635292	49640201	-	1160	protein_coding	RAS related [Source:HGNC Symbol;Acc:HGNC:10447]	-
ENSG00000058866	49.5592	96.8676	-0.989923	5.11e-05	0.000625099	DGKG	3	186105668	186362237	-	10978	protein_coding	diacylglycerol kinase gamma [Source:HGNC Symbol;Acc:HGNC:2853]	-
ENSG00000237945	60.5087	105.786	-0.79552	5.13e-05	0.000626765	LINC00649	21	33915534	33977691	+	14336	antisense	long intergenic non-protein coding RNA 649 [Source:HGNC Symbol;Acc:HGNC:44305]	-
ENSG00000175061	5324.04	3653.49	0.543018	5.2e-05	0.000635331	LRRC75A-AS1	17	16438822	16478678	+	3759	processed_transcript	LRRC75A antisense RNA 1 [Source:HGNC Symbol;Acc:HGNC:28619]	-
ENSG00000278272	62.0653	8.54033	2.85865	5.2e-05	0.000635331	HIST1H3C	6	26045411	26045821	+	411	protein_coding	histone cluster 1 H3 family member c [Source:HGNC Symbol;Acc:HGNC:4768]	-
ENSG00000186026	43.3604	18.2963	1.22553	5.21e-05	0.000635331	ZNF284	19	44072144	44089613	+	4351	protein_coding	zinc finger protein 284 [Source:HGNC Symbol;Acc:HGNC:13078]	zf-C2H2
ENSG00000136244	13.219	0.352294	5.15151	5.22e-05	0.000636427	IL6	7	22725884	22732002	+	2069	protein_coding	interleukin 6 [Source:HGNC Symbol;Acc:HGNC:6018]	-
ENSG00000059588	129.801	227.916	-0.802888	5.24e-05	0.000638966	TARBP1	1	234391313	234479103	-	7743	protein_coding	TAR (HIV-1) RNA binding protein 1 [Source:HGNC Symbol;Acc:HGNC:11568]	-
ENSG00000196498	4325.03	2814.75	0.619503	5.27e-05	0.000642384	NCOR2	12	124324415	124567589	-	13975	protein_coding	nuclear receptor corepressor 2 [Source:HGNC Symbol;Acc:HGNC:7673]	MYB
ENSG00000125944	2067.45	3241.03	-0.647643	5.29e-05	0.000643643	HNRNPR	1	23303771	23344336	-	8676	protein_coding	heterogeneous nuclear ribonucleoprotein R [Source:HGNC Symbol;Acc:HGNC:5047]	-
ENSG00000078699	492.816	344.392	0.519556	5.29e-05	0.000643643	CBFA2T2	20	33490075	33650036	+	9457	protein_coding	CBFA2/RUNX1 translocation partner 2 [Source:HGNC Symbol;Acc:HGNC:1536]	-
ENSG00000196230	7668.1	11549.1	-0.591105	5.35e-05	0.000649818	TUBB	6	30720201	30725426	+	3359	protein_coding	tubulin beta class I [Source:HGNC Symbol;Acc:HGNC:20778]	-
ENSG00000163273	73.2976	22.7247	1.70052	5.35e-05	0.000649818	NPPC	2	231921820	231926403	-	1071	protein_coding	natriuretic peptide C [Source:HGNC Symbol;Acc:HGNC:7941]	-
ENSG00000163794	67.2925	31.3146	1.11314	5.4e-05	0.000655807	UCN	2	27307400	27308445	-	795	protein_coding	urocortin [Source:HGNC Symbol;Acc:HGNC:12516]	-
ENSG00000163734	273.957	7.99965	5.09793	5.43e-05	0.000658896	CXCL3	4	74036589	74038807	-	2219	protein_coding	C-X-C motif chemokine ligand 3 [Source:HGNC Symbol;Acc:HGNC:4604]	-
ENSG00000121316	371.212	588.213	-0.66647	5.43e-05	0.000659122	PLBD1	12	14503661	14568349	-	2841	protein_coding	phospholipase B domain containing 1 [Source:HGNC Symbol;Acc:HGNC:26215]	-
ENSG00000180448	846.949	474.618	0.833632	5.5e-05	0.000666747	ARHGAP45	19	1065923	1086628	+	6238	protein_coding	Rho GTPase activating protein 45 [Source:HGNC Symbol;Acc:HGNC:17102]	-
ENSG00000221890	257.894	468.792	-0.865997	5.5e-05	0.000666879	NPTXR	22	38818452	38843982	-	5784	protein_coding	neuronal pentraxin receptor [Source:HGNC Symbol;Acc:HGNC:7954]	-
ENSG00000254531	135.25	65.6912	1.04464	5.54e-05	0.000670965	FLJ20021	4	101347780	101348883	+	790	lincRNA	uncharacterized LOC90024 [Source:NCBI gene;Acc:90024]	-
ENSG00000111707	826.314	1116.33	-0.433743	5.55e-05	0.000672222	SUDS3	12	118376380	118418031	+	5731	protein_coding	SDS3 homolog, SIN3A corepressor complex component [Source:HGNC Symbol;Acc:HGNC:29545]	-
ENSG00000234338	5.42301	24.229	-2.14494	5.57e-05	0.000674071	AC073349.2	7	64835280	64836882	-	1603	processed_pseudogene	endogenous retroviral family W, env(C7), member 2 (ERVWE2) pseudogene	-
ENSG00000166685	298.569	187.971	0.662491	5.58e-05	0.000675308	COG1	17	73192632	73208507	+	5317	protein_coding	component of oligomeric golgi complex 1 [Source:HGNC Symbol;Acc:HGNC:6545]	-
ENSG00000075413	1943.18	1438.36	0.434141	5.63e-05	0.000680086	MARK3	14	103385392	103503831	+	8891	protein_coding	microtubule affinity regulating kinase 3 [Source:HGNC Symbol;Acc:HGNC:6897]	-
ENSG00000106976	1068.32	1496.45	-0.486768	5.65e-05	0.000682387	DNM1	9	128191655	128255248	+	10775	protein_coding	dynamin 1 [Source:HGNC Symbol;Acc:HGNC:2972]	-
ENSG00000179295	2074.71	3306.93	-0.671652	5.66e-05	0.000682791	PTPN11	12	112418351	112509913	+	7023	protein_coding	protein tyrosine phosphatase, non-receptor type 11 [Source:HGNC Symbol;Acc:HGNC:9644]	-
ENSG00000116898	1267.86	955.243	0.408297	5.67e-05	0.000684361	MRPS15	1	36455718	36464437	-	2916	protein_coding	mitochondrial ribosomal protein S15 [Source:HGNC Symbol;Acc:HGNC:14504]	-
ENSG00000163946	526.231	1091.17	-1.04927	5.68e-05	0.000685112	FAM208A	3	56620133	56683237	-	9824	protein_coding	family with sequence similarity 208 member A [Source:HGNC Symbol;Acc:HGNC:30314]	-
ENSG00000127084	66.4509	129.786	-0.975319	5.73e-05	0.000690527	FGD3	9	92947451	93036236	+	5890	protein_coding	FYVE, RhoGEF and PH domain containing 3 [Source:HGNC Symbol;Acc:HGNC:16027]	-
ENSG00000240036	41.2088	15.051	1.47666	5.74e-05	0.000691416	AC104563.1	11	27581680	27582055	+	376	processed_pseudogene	novel pseudogene	-
ENSG00000163072	7.58009	25.1354	-1.70971	5.76e-05	0.000693003	NOSTRIN	2	168786539	168865514	+	5248	protein_coding	nitric oxide synthase trafficking [Source:HGNC Symbol;Acc:HGNC:20203]	-
ENSG00000230148	48.5004	19.2222	1.35205	5.77e-05	0.000694594	HOXB-AS1	17	48543551	48551250	+	1559	antisense	HOXB cluster antisense RNA 1 [Source:HGNC Symbol;Acc:HGNC:43744]	-
ENSG00000173889	466.683	297.865	0.651201	5.79e-05	0.000696548	PHC3	3	170086732	170181749	-	16919	protein_coding	polyhomeotic homolog 3 [Source:HGNC Symbol;Acc:HGNC:15682]	-
ENSG00000061936	875.064	545.398	0.679969	5.8e-05	0.000696597	SFSWAP	12	131711081	131799737	+	10157	protein_coding	splicing factor SWAP [Source:HGNC Symbol;Acc:HGNC:10790]	-
ENSG00000059804	3814.61	269.451	3.82353	5.84e-05	0.000701625	SLC2A3	12	7919230	7936275	-	6159	protein_coding	solute carrier family 2 member 3 [Source:HGNC Symbol;Acc:HGNC:11007]	-
ENSG00000169359	104.685	225.55	-1.09647	5.84e-05	0.000701625	SLC33A1	3	155821024	155854456	-	10040	protein_coding	solute carrier family 33 member 1 [Source:HGNC Symbol;Acc:HGNC:95]	-
ENSG00000164587	9028.01	6686.31	0.43325	5.87e-05	0.000704164	RPS14	5	150442635	150449756	-	5099	protein_coding	ribosomal protein S14 [Source:HGNC Symbol;Acc:HGNC:10387]	-
ENSG00000177542	867.01	468.497	0.886385	5.89e-05	0.000706292	SLC25A22	11	790475	798333	-	4647	protein_coding	solute carrier family 25 member 22 [Source:HGNC Symbol;Acc:HGNC:19954]	-
ENSG00000117139	2701.88	1215.27	1.15325	5.92e-05	0.000709333	KDM5B	1	202724495	202809470	-	25882	protein_coding	lysine demethylase 5B [Source:HGNC Symbol;Acc:HGNC:18039]	ARID
ENSG00000159167	193.169	4.73398	5.3512	5.92e-05	0.000709515	STC1	8	23841915	23854807	-	4149	protein_coding	stanniocalcin 1 [Source:HGNC Symbol;Acc:HGNC:11373]	-
ENSG00000204209	1214.65	748.568	0.696728	5.93e-05	0.000709649	DAXX	6	33318558	33323016	-	3084	protein_coding	death domain associated protein [Source:HGNC Symbol;Acc:HGNC:2681]	-
ENSG00000151893	476.089	347.534	0.456487	5.94e-05	0.000711148	CACUL1	10	118674167	118755249	-	12406	protein_coding	CDK2 associated cullin domain 1 [Source:HGNC Symbol;Acc:HGNC:23727]	-
ENSG00000274827	34.6771	77.5477	-1.15362	6.01e-05	0.000718474	LINC01297	14	19344578	19384587	-	4414	lincRNA	long intergenic non-protein coding RNA 1297 [Source:HGNC Symbol;Acc:HGNC:50443]	-
ENSG00000233515	59.6461	20.5664	1.51741	6.02e-05	0.000719027	LINC01518	10	42674197	42691723	-	519	lincRNA	long intergenic non-protein coding RNA 1518 [Source:HGNC Symbol;Acc:HGNC:51216]	-
ENSG00000235760	6.57907	27.4657	-2.0582	6.04e-05	0.000721214	HCG2040054	2	47527008	47535199	+	1295	antisense	uncharacterized LOC644093 [Source:NCBI gene;Acc:644093]	-
ENSG00000279359	3.39965	22.6314	-2.83929	6.08e-05	0.000725814	AL359195.2	10	80249710	80254121	+	4412	TEC	TEC	-
ENSG00000122863	419.338	210.235	0.991855	6.1e-05	0.000727673	CHST3	10	71964365	72013564	+	6970	protein_coding	carbohydrate sulfotransferase 3 [Source:HGNC Symbol;Acc:HGNC:1971]	-
ENSG00000183111	45.6306	11.8576	1.9596	6.13e-05	0.000731207	ARHGEF37	5	149551947	149634968	+	5324	protein_coding	Rho guanine nucleotide exchange factor 37 [Source:HGNC Symbol;Acc:HGNC:34430]	-
ENSG00000161638	1167.32	377.73	1.62854	6.16e-05	0.000734129	ITGA5	12	54395261	54419460	-	7577	protein_coding	integrin subunit alpha 5 [Source:HGNC Symbol;Acc:HGNC:6141]	-
ENSG00000187189	192.141	358.813	-0.89368	6.17e-05	0.000734194	TSPYL4	6	116249961	116254140	-	4180	protein_coding	TSPY like 4 [Source:HGNC Symbol;Acc:HGNC:21559]	-
ENSG00000263272	14.3267	50.6879	-1.78808	6.17e-05	0.000734194	AC004148.2	17	5425139	5432876	-	1938	antisense	novel transcript, antisense to RPAIN	-
ENSG00000167995	17.3955	4.06984	2.1375	6.17e-05	0.000734194	BEST1	11	61949821	61965515	+	8930	protein_coding	bestrophin 1 [Source:HGNC Symbol;Acc:HGNC:12703]	-
ENSG00000145087	1.70969	15.7698	-3.06248	6.17e-05	0.000734194	STXBP5L	3	120908072	121424761	+	11085	protein_coding	syntaxin binding protein 5 like [Source:HGNC Symbol;Acc:HGNC:30757]	-
ENSG00000163121	17.1231	1.39811	3.55417	6.18e-05	0.000735138	NEURL3	2	96497643	96508109	-	2497	protein_coding	neuralized E3 ubiquitin protein ligase 3 [Source:HGNC Symbol;Acc:HGNC:25162]	-
ENSG00000275074	80.0411	41.2555	0.953691	6.25e-05	0.000741956	NUDT18	8	22106872	22109419	-	1756	protein_coding	nudix hydrolase 18 [Source:HGNC Symbol;Acc:HGNC:26194]	-
ENSG00000105321	517.103	227.434	1.18176	6.25e-05	0.000741956	CCDC9	19	47255980	47273701	+	3845	protein_coding	coiled-coil domain containing 9 [Source:HGNC Symbol;Acc:HGNC:24560]	-
ENSG00000119965	260.391	167.239	0.636802	6.27e-05	0.000743613	C10orf88	10	122930903	122954403	-	3173	protein_coding	chromosome 10 open reading frame 88 [Source:HGNC Symbol;Acc:HGNC:25822]	-
ENSG00000143867	54.2347	20.2995	1.43257	6.28e-05	0.000744461	OSR1	2	19351485	19358653	-	5309	protein_coding	odd-skipped related transciption factor 1 [Source:HGNC Symbol;Acc:HGNC:8111]	zf-C2H2
ENSG00000144791	480.226	337.273	0.510758	6.3e-05	0.000746795	LIMD1	3	45555394	45686338	+	12673	protein_coding	LIM domains containing 1 [Source:HGNC Symbol;Acc:HGNC:6612]	-
ENSG00000131931	228.349	137.541	0.733348	6.31e-05	0.000747854	THAP1	8	42836674	42843325	-	2462	protein_coding	THAP domain containing 1 [Source:HGNC Symbol;Acc:HGNC:20856]	THAP
ENSG00000151360	13.5743	2.15905	2.65706	6.32e-05	0.000748213	ALLC	2	3658195	3702671	+	2542	protein_coding	allantoicase [Source:HGNC Symbol;Acc:HGNC:17377]	-
ENSG00000164484	17.6518	3.91633	2.20977	6.34e-05	0.000750296	TMEM200A	6	130365734	130443063	+	6137	protein_coding	transmembrane protein 200A [Source:HGNC Symbol;Acc:HGNC:21075]	-
ENSG00000107140	213.226	97.5971	1.12187	6.46e-05	0.000763323	TESK1	9	35605305	35610041	+	3298	protein_coding	testis associated actin remodelling kinase 1 [Source:HGNC Symbol;Acc:HGNC:11731]	-
ENSG00000234233	45.7705	16.1974	1.48158	6.46e-05	0.000763323	KCNH1-IT1	1	211132588	211133374	-	626	sense_intronic	KCNH1 intronic transcript 1 [Source:HGNC Symbol;Acc:HGNC:41351]	-
ENSG00000069248	618.971	891.685	-0.527383	6.47e-05	0.000763913	NUP133	1	229440260	229508341	-	6080	protein_coding	nucleoporin 133 [Source:HGNC Symbol;Acc:HGNC:18016]	-
ENSG00000273306	5.69755	28.2209	-2.25355	6.48e-05	0.000764988	AC018690.1	2	99405218	99405843	+	626	antisense	novel transcript	-
ENSG00000218336	483.148	857.081	-0.830497	6.54e-05	0.00077192	TENM3	4	182143987	182803024	+	11983	protein_coding	teneurin transmembrane protein 3 [Source:HGNC Symbol;Acc:HGNC:29944]	-
ENSG00000151689	394.904	230.065	0.776831	6.55e-05	0.000773007	INPP1	2	190343470	190371665	+	3676	protein_coding	inositol polyphosphate-1-phosphatase [Source:HGNC Symbol;Acc:HGNC:6071]	-
ENSG00000129235	868.006	495.238	0.810065	6.62e-05	0.000780147	TXNDC17	17	6640758	6644541	+	3784	protein_coding	thioredoxin domain containing 17 [Source:HGNC Symbol;Acc:HGNC:28218]	-
ENSG00000226683	13.5933	2.72603	2.34697	6.67e-05	0.000786005	PWWP2AP1	13	80654755	80657027	+	2273	processed_pseudogene	PWWP domain containing 2A pseudogene 1 [Source:HGNC Symbol;Acc:HGNC:39709]	-
ENSG00000101265	121.272	184.813	-0.604203	6.77e-05	0.000796905	RASSF2	20	4780023	4823645	-	5759	protein_coding	Ras association domain family member 2 [Source:HGNC Symbol;Acc:HGNC:9883]	-
ENSG00000115364	729.705	1052.15	-0.526276	6.78e-05	0.000797663	MRPL19	2	75646783	75690851	+	4601	protein_coding	mitochondrial ribosomal protein L19 [Source:HGNC Symbol;Acc:HGNC:14052]	-
ENSG00000164105	487.36	179.675	1.44182	6.78e-05	0.000797986	SAP30	4	173369969	173377532	+	1320	protein_coding	Sin3A associated protein 30 [Source:HGNC Symbol;Acc:HGNC:10532]	-
ENSG00000143774	1237.42	835.537	0.566142	6.79e-05	0.000797986	GUK1	1	228139962	228148984	+	4725	protein_coding	guanylate kinase 1 [Source:HGNC Symbol;Acc:HGNC:4693]	-
ENSG00000110583	500.508	678.582	-0.440859	6.8e-05	0.000798699	NAA40	11	63938959	63957328	+	5321	protein_coding	N(alpha)-acetyltransferase 40, NatD catalytic subunit [Source:HGNC Symbol;Acc:HGNC:25845]	-
ENSG00000160963	174.135	354.778	-1.03447	6.82e-05	0.000800431	COL26A1	7	101362820	101559024	+	3156	protein_coding	collagen type XXVI alpha 1 chain [Source:HGNC Symbol;Acc:HGNC:18038]	-
ENSG00000141580	1810.51	945.126	0.938675	6.84e-05	0.000803131	WDR45B	17	82614562	82648553	-	3542	protein_coding	WD repeat domain 45B [Source:HGNC Symbol;Acc:HGNC:25072]	-
ENSG00000160284	417.823	218.984	0.934595	6.85e-05	0.000803984	SPATC1L	21	46161148	46184476	-	2333	protein_coding	spermatogenesis and centriole associated 1 like [Source:HGNC Symbol;Acc:HGNC:1298]	-
ENSG00000159200	591.135	390.733	0.595222	6.87e-05	0.000805867	RCAN1	21	34513142	34615142	-	6990	protein_coding	regulator of calcineurin 1 [Source:HGNC Symbol;Acc:HGNC:3040]	-
ENSG00000004534	982.121	731.065	0.424072	6.88e-05	0.000806379	RBM6	3	49940007	50100045	+	7302	protein_coding	RNA binding motif protein 6 [Source:HGNC Symbol;Acc:HGNC:9903]	-
ENSG00000120800	1011.69	1775.21	-0.812535	6.89e-05	0.000807324	UTP20	12	101280109	101386616	+	10024	protein_coding	UTP20, small subunit processome component [Source:HGNC Symbol;Acc:HGNC:17897]	-
ENSG00000068650	154.521	268.103	-0.793584	6.95e-05	0.000813059	ATP11A	13	112690329	112887168	+	13733	protein_coding	ATPase phospholipid transporting 11A [Source:HGNC Symbol;Acc:HGNC:13552]	-
ENSG00000102871	184.789	99.409	0.895662	6.98e-05	0.00081591	TRADD	16	67154180	67160298	-	2567	protein_coding	TNFRSF1A associated via death domain [Source:HGNC Symbol;Acc:HGNC:12030]	-
ENSG00000179921	34.4335	81.0323	-1.22046	6.98e-05	0.00081591	GPBAR1	2	218259496	218263859	+	2692	protein_coding	G protein-coupled bile acid receptor 1 [Source:HGNC Symbol;Acc:HGNC:19680]	-
ENSG00000163939	563.716	950.092	-0.751738	7.04e-05	0.000823065	PBRM1	3	52545352	52685917	-	9654	protein_coding	polybromo 1 [Source:HGNC Symbol;Acc:HGNC:30064]	HMG
ENSG00000163874	473.699	95.1654	2.31363	7.05e-05	0.000823226	ZC3H12A	1	37474552	37484379	+	3121	protein_coding	zinc finger CCCH-type containing 12A [Source:HGNC Symbol;Acc:HGNC:26259]	-
ENSG00000173218	34.1771	69.3122	-1.03762	7.07e-05	0.000824874	VANGL1	1	115641953	115698224	+	9062	protein_coding	VANGL planar cell polarity protein 1 [Source:HGNC Symbol;Acc:HGNC:15512]	-
ENSG00000104129	128.105	75.6859	0.752305	7.08e-05	0.000826608	DNAJC17	15	40765155	40807478	-	5634	protein_coding	DnaJ heat shock protein family (Hsp40) member C17 [Source:HGNC Symbol;Acc:HGNC:25556]	-
ENSG00000182324	27.667	59.9086	-1.12556	7.1e-05	0.000827995	KCNJ14	19	48455509	48466980	+	4340	protein_coding	potassium voltage-gated channel subfamily J member 14 [Source:HGNC Symbol;Acc:HGNC:6260]	-
ENSG00000198753	173.228	59.7016	1.54138	7.11e-05	0.000828549	PLXNB3	X	153764196	153779346	+	7007	protein_coding	plexin B3 [Source:HGNC Symbol;Acc:HGNC:9105]	-
ENSG00000136937	1197.12	2042.55	-0.769438	7.11e-05	0.000828549	NCBP1	9	97633626	97673748	+	5548	protein_coding	nuclear cap binding protein subunit 1 [Source:HGNC Symbol;Acc:HGNC:7658]	-
ENSG00000141027	1120.6	1476.41	-0.396759	7.12e-05	0.000828549	NCOR1	17	16029157	16218185	-	15404	protein_coding	nuclear receptor corepressor 1 [Source:HGNC Symbol;Acc:HGNC:7672]	MYB
ENSG00000130700	140.404	75.9567	0.892	7.13e-05	0.000829118	GATA5	20	62463497	62475970	-	2595	protein_coding	GATA binding protein 5 [Source:HGNC Symbol;Acc:HGNC:15802]	zf-GATA
ENSG00000271474	13.4496	35.4943	-1.4142	7.14e-05	0.000830023	AC106881.1	4	95549129	95552457	+	3329	antisense	uncharacterized LOC105377335 [Source:NCBI gene;Acc:105377335]	-
ENSG00000251361	13.7989	2.44598	2.52858	7.14e-05	0.000830142	AC012625.1	5	93019663	93068669	-	625	lincRNA	novel transcript	-
ENSG00000173933	83.5818	169.361	-1.02764	7.16e-05	0.000831526	RBM4	11	66638617	66668374	+	6589	protein_coding	RNA binding motif protein 4 [Source:HGNC Symbol;Acc:HGNC:9901]	-
ENSG00000010319	13.6453	53.1637	-1.93288	7.17e-05	0.000831985	SEMA3G	3	52433053	52445085	-	5011	protein_coding	semaphorin 3G [Source:HGNC Symbol;Acc:HGNC:30400]	-
ENSG00000232472	187.49	107.598	0.795106	7.19e-05	0.000834679	EEF1B2P3	X	24788392	24789069	-	678	processed_pseudogene	eukaryotic translation elongation factor 1 beta 2 pseudogene 3 [Source:HGNC Symbol;Acc:HGNC:3210]	-
ENSG00000015171	344.666	477.08	-0.467083	7.2e-05	0.000834679	ZMYND11	10	134465	254637	+	5300	protein_coding	zinc finger MYND-type containing 11 [Source:HGNC Symbol;Acc:HGNC:16966]	-
ENSG00000275713	54.3763	21.6584	1.33311	7.26e-05	0.000841497	HIST1H2BH	6	26251651	26253710	+	2060	protein_coding	histone cluster 1 H2B family member h [Source:HGNC Symbol;Acc:HGNC:4755]	-
ENSG00000162191	1029.96	633.274	0.699731	7.31e-05	0.000846465	UBXN1	11	62676498	62679117	-	2532	protein_coding	UBX domain protein 1 [Source:HGNC Symbol;Acc:HGNC:18402]	-
ENSG00000163466	2751.93	1861.62	0.564413	7.31e-05	0.000846465	ARPC2	2	218217094	218254356	+	6562	protein_coding	actin related protein 2/3 complex subunit 2 [Source:HGNC Symbol;Acc:HGNC:705]	-
ENSG00000185989	489.42	287.309	0.765197	7.32e-05	0.000846775	RASA3	13	113977783	114132611	-	4763	protein_coding	RAS p21 protein activator 3 [Source:HGNC Symbol;Acc:HGNC:20331]	-
ENSG00000185220	51.4023	113.525	-1.16615	7.34e-05	0.000848527	PGBD2	1	248906196	248919946	+	3651	protein_coding	piggyBac transposable element derived 2 [Source:HGNC Symbol;Acc:HGNC:19399]	-
ENSG00000076555	153.281	285.01	-0.905066	7.34e-05	0.000848527	ACACB	12	109116595	109268226	+	14505	protein_coding	acetyl-CoA carboxylase beta [Source:HGNC Symbol;Acc:HGNC:85]	-
ENSG00000184584	860.854	582.447	0.565402	7.35e-05	0.000849084	TMEM173	5	139475534	139482935	-	3850	protein_coding	transmembrane protein 173 [Source:HGNC Symbol;Acc:HGNC:27962]	-
ENSG00000161243	146.951	86.4265	0.77295	7.37e-05	0.000850748	FBXO27	19	38990714	39032785	-	2833	protein_coding	F-box protein 27 [Source:HGNC Symbol;Acc:HGNC:18753]	-
ENSG00000143815	902.845	1926.34	-1.09166	7.42e-05	0.000856841	LBR	1	225401502	225428925	-	5257	protein_coding	lamin B receptor [Source:HGNC Symbol;Acc:HGNC:6518]	-
ENSG00000265806	5.02241	23.0418	-2.2647	7.48e-05	0.000862356	MIR4292	9	136830957	136831023	+	67	miRNA	microRNA 4292 [Source:HGNC Symbol;Acc:HGNC:38348]	-
ENSG00000143507	441.711	268.108	0.723763	7.52e-05	0.000866869	DUSP10	1	221701424	221742176	-	2914	protein_coding	dual specificity phosphatase 10 [Source:HGNC Symbol;Acc:HGNC:3065]	-
ENSG00000082126	16.6377	4.68629	1.82436	7.53e-05	0.00086749	MPP4	2	201644870	201698694	-	4924	protein_coding	membrane palmitoylated protein 4 [Source:HGNC Symbol;Acc:HGNC:13680]	-
ENSG00000121680	304.455	203.933	0.5728	7.57e-05	0.000871624	PEX16	11	45909669	45918812	-	3013	protein_coding	peroxisomal biogenesis factor 16 [Source:HGNC Symbol;Acc:HGNC:8857]	-
ENSG00000049759	1045.77	680.636	0.621105	7.63e-05	0.000877768	NEDD4L	18	58044367	58401540	+	17455	protein_coding	neural precursor cell expressed, developmentally down-regulated 4-like, E3 ubiquitin protein ligase [Source:HGNC Symbol;Acc:HGNC:7728]	-
ENSG00000148680	28.1133	10.0339	1.48474	7.63e-05	0.000877983	HTR7	10	90740823	90857698	-	3131	protein_coding	5-hydroxytryptamine receptor 7 [Source:HGNC Symbol;Acc:HGNC:5302]	-
ENSG00000198948	45.7926	85.6534	-0.892391	7.65e-05	0.000879026	MFAP3L	4	169986597	170033031	-	8741	protein_coding	microfibril associated protein 3 like [Source:HGNC Symbol;Acc:HGNC:29083]	-
ENSG00000278000	5.11837	20.1466	-2.00574	7.65e-05	0.000879026	AC139100.2	18	80161752	80162413	+	662	sense_intronic	novel transcript	-
ENSG00000236901	58.0797	137.777	-1.22822	7.67e-05	0.000881586	MIR600HG	9	123109494	123115477	-	5984	sense_intronic	MIR600 host gene [Source:HGNC Symbol;Acc:HGNC:23642]	-
ENSG00000171621	368.541	152.081	1.28031	7.68e-05	0.000881611	SPSB1	1	9292880	9369532	+	3403	protein_coding	splA/ryanodine receptor domain and SOCS box containing 1 [Source:HGNC Symbol;Acc:HGNC:30628]	-
ENSG00000185624	5207.93	3366.28	0.629941	7.68e-05	0.000881611	P4HB	17	81843159	81860694	-	5303	protein_coding	prolyl 4-hydroxylase subunit beta [Source:HGNC Symbol;Acc:HGNC:8548]	-
ENSG00000150347	722.768	321.822	1.16928	7.69e-05	0.000881611	ARID5B	10	61901300	62096944	+	9144	protein_coding	AT-rich interaction domain 5B [Source:HGNC Symbol;Acc:HGNC:17362]	ARID
ENSG00000091140	944.271	1308.56	-0.469815	7.7e-05	0.000883149	DLD	7	107890970	107931730	+	5299	protein_coding	dihydrolipoamide dehydrogenase [Source:HGNC Symbol;Acc:HGNC:2898]	-
ENSG00000228705	145.457	16.844	3.11185	7.72e-05	0.000884739	LINC00659	20	62774128	62775412	-	540	antisense	long intergenic non-protein coding RNA 659 [Source:HGNC Symbol;Acc:HGNC:44316]	-
ENSG00000107951	488.973	350.529	0.479214	7.74e-05	0.000886181	MTPAP	10	30309801	30374448	-	8382	protein_coding	mitochondrial poly(A) polymerase [Source:HGNC Symbol;Acc:HGNC:25532]	-
ENSG00000197417	36.8106	15.1275	1.26024	7.75e-05	0.000886613	SHPK	17	3608262	3636322	-	3838	protein_coding	sedoheptulokinase [Source:HGNC Symbol;Acc:HGNC:1492]	-
ENSG00000120685	635.704	892.01	-0.486259	7.76e-05	0.000887306	PROSER1	13	39009866	39038076	-	7315	protein_coding	proline and serine rich 1 [Source:HGNC Symbol;Acc:HGNC:20291]	-
ENSG00000184602	298.114	470.203	-0.656919	7.8e-05	0.000891253	SNN	16	11668414	11679159	+	3312	protein_coding	stannin [Source:HGNC Symbol;Acc:HGNC:11149]	-
ENSG00000078401	11.7301	0.397575	4.93803	7.82e-05	0.000893615	EDN1	6	12290363	12297194	+	2033	protein_coding	endothelin 1 [Source:HGNC Symbol;Acc:HGNC:3176]	-
ENSG00000011007	1302.58	819.996	0.666208	7.84e-05	0.00089544	ELOA	1	23743155	23762059	+	5391	protein_coding	elongin A [Source:HGNC Symbol;Acc:HGNC:11620]	-
ENSG00000235138	0.366254	8.6704	-4.49754	7.85e-05	0.00089544	AL445931.1	9	134054290	134058805	+	2112	antisense	uncharacterized LOC100130548 [Source:NCBI gene;Acc:100130548]	-
ENSG00000197062	114.369	64.1553	0.839124	7.85e-05	0.000895681	ZSCAN26	6	28267010	28278224	+	2933	protein_coding	zinc finger and SCAN domain containing 26 [Source:HGNC Symbol;Acc:HGNC:12978]	-
ENSG00000234741	4829.61	3186.41	0.600374	7.86e-05	0.000895708	GAS5	1	173863900	173868882	-	3631	processed_transcript	growth arrest specific 5 [Source:HGNC Symbol;Acc:HGNC:16355]	-
ENSG00000131409	584.856	298.26	0.968513	7.93e-05	0.000903891	LRRC4B	19	50516892	50568045	-	3121	protein_coding	leucine rich repeat containing 4B [Source:HGNC Symbol;Acc:HGNC:25042]	-
ENSG00000157349	225.951	143.408	0.658895	8e-05	0.000910579	DDX19B	16	70289663	70335283	+	4522	protein_coding	DEAD-box helicase 19B [Source:HGNC Symbol;Acc:HGNC:2742]	-
ENSG00000158467	166.472	272.617	-0.704671	8e-05	0.000910579	AHCYL2	7	129225023	129430211	+	6858	protein_coding	adenosylhomocysteinase like 2 [Source:HGNC Symbol;Acc:HGNC:22204]	-
ENSG00000067829	460.02	327.362	0.490622	8.01e-05	0.000911533	IDH3G	X	153785766	153794523	-	2717	protein_coding	isocitrate dehydrogenase 3 (NAD(+)) gamma [Source:HGNC Symbol;Acc:HGNC:5386]	-
ENSG00000057252	525.962	869.908	-0.72226	8.07e-05	0.000917417	SOAT1	1	179293714	179358680	+	7005	protein_coding	sterol O-acyltransferase 1 [Source:HGNC Symbol;Acc:HGNC:11177]	-
ENSG00000198886	222781	122151	0.86696	8.07e-05	0.000917417	MT-ND4	MT	10760	12137	+	1378	protein_coding	mitochondrially encoded NADH:ubiquinone oxidoreductase core subunit 4 [Source:HGNC Symbol;Acc:HGNC:7459]	-
ENSG00000173334	527.319	239.135	1.14345	8.08e-05	0.000917417	TRIB1	8	125430321	125438405	+	4138	protein_coding	tribbles pseudokinase 1 [Source:HGNC Symbol;Acc:HGNC:16891]	-
ENSG00000131435	843.956	511.753	0.71949	8.08e-05	0.000917417	PDLIM4	5	132257671	132273454	+	3192	protein_coding	PDZ and LIM domain 4 [Source:HGNC Symbol;Acc:HGNC:16501]	-
ENSG00000056972	370.276	167.292	1.15019	8.1e-05	0.000919445	TRAF3IP2	6	111556454	111606278	-	6553	protein_coding	TRAF3 interacting protein 2 [Source:HGNC Symbol;Acc:HGNC:1343]	-
ENSG00000146802	82.3674	136.578	-0.719865	8.11e-05	0.000919445	TMEM168	7	112762382	112790592	-	7995	protein_coding	transmembrane protein 168 [Source:HGNC Symbol;Acc:HGNC:25826]	-
ENSG00000146966	53.8287	24.9007	1.12285	8.11e-05	0.000919445	DENND2A	7	140518420	140673993	-	5148	protein_coding	DENN domain containing 2A [Source:HGNC Symbol;Acc:HGNC:22212]	-
ENSG00000250251	341.704	154.483	1.14248	8.12e-05	0.000919445	PKD1P6	16	15125242	15154564	-	6015	transcribed_unprocessed_pseudogene	polycystin 1, transient receptor potential channel interacting pseudogene 6 [Source:HGNC Symbol;Acc:HGNC:30070]	-
ENSG00000125347	102.56	52.3811	0.958855	8.15e-05	0.000922609	IRF1	5	132481609	132490798	-	7799	protein_coding	interferon regulatory factor 1 [Source:HGNC Symbol;Acc:HGNC:6116]	IRF
ENSG00000149761	195.862	115.956	0.753683	8.15e-05	0.000922773	NUDT22	11	64225941	64230686	+	3721	protein_coding	nudix hydrolase 22 [Source:HGNC Symbol;Acc:HGNC:28189]	-
ENSG00000149781	48.0517	19.3117	1.31239	8.27e-05	0.000935418	FERMT3	11	64206678	64223886	+	3066	protein_coding	fermitin family member 3 [Source:HGNC Symbol;Acc:HGNC:23151]	-
ENSG00000273449	1.92943	19.6256	-3.209	8.35e-05	0.00094361	AC093788.1	4	163529771	163530697	+	927	lincRNA	novel transcript	-
ENSG00000196843	1284.79	862.909	0.57334	8.4e-05	0.000949587	ARID5A	2	96536743	96552638	+	3565	protein_coding	AT-rich interaction domain 5A [Source:HGNC Symbol;Acc:HGNC:17361]	ARID
ENSG00000171094	57.3701	10.1902	2.49839	8.41e-05	0.000950024	ALK	2	29192774	29921566	-	7362	protein_coding	ALK receptor tyrosine kinase [Source:HGNC Symbol;Acc:HGNC:427]	-
ENSG00000112183	1016.21	1711.94	-0.750515	8.45e-05	0.000954197	RBM24	6	17281346	17293875	+	3444	protein_coding	RNA binding motif protein 24 [Source:HGNC Symbol;Acc:HGNC:21539]	-
ENSG00000161914	112.287	50.2034	1.15158	8.47e-05	0.000954723	ZNF653	19	11483427	11505923	-	3301	protein_coding	zinc finger protein 653 [Source:HGNC Symbol;Acc:HGNC:25196]	zf-C2H2
ENSG00000124171	104.657	41.717	1.33802	8.47e-05	0.000954723	PARD6B	20	50731544	50756795	+	4726	protein_coding	par-6 family cell polarity regulator beta [Source:HGNC Symbol;Acc:HGNC:16245]	-
ENSG00000179314	481.874	1310.47	-1.44616	8.48e-05	0.000955378	WSCD1	17	6057807	6124427	+	7136	protein_coding	WSC domain containing 1 [Source:HGNC Symbol;Acc:HGNC:29060]	-
ENSG00000066279	446.969	1922.97	-2.10332	8.48e-05	0.000955378	ASPM	1	197084128	197146694	-	10887	protein_coding	abnormal spindle microtubule assembly [Source:HGNC Symbol;Acc:HGNC:19048]	-
ENSG00000048740	1079.63	1458.53	-0.433703	8.49e-05	0.000955378	CELF2	10	10798397	11336675	+	10978	protein_coding	CUGBP Elav-like family member 2 [Source:HGNC Symbol;Acc:HGNC:2550]	-
ENSG00000175701	160.2	92.2365	0.790812	8.49e-05	0.000955378	MTLN	2	110211529	110245420	-	2051	protein_coding	mitoregulin [Source:HGNC Symbol;Acc:HGNC:27339]	-
ENSG00000124701	23.8984	58.6186	-1.2833	8.51e-05	0.000956898	APOBEC2	6	41053304	41064511	+	1151	protein_coding	apolipoprotein B mRNA editing enzyme catalytic subunit 2 [Source:HGNC Symbol;Acc:HGNC:605]	-
ENSG00000162496	153.611	21.5119	2.83995	8.53e-05	0.000958851	DHRS3	1	12567910	12617731	-	3036	protein_coding	dehydrogenase/reductase 3 [Source:HGNC Symbol;Acc:HGNC:17693]	-
ENSG00000275620	53.7441	133.233	-1.30167	8.56e-05	0.000961194	FLJ16779	20	63253978	63261615	+	7638	antisense	uncharacterized LOC100192386 [Source:NCBI gene;Acc:100192386]	-
ENSG00000279117	85.0375	162.38	-0.918845	8.62e-05	0.000968339	AP001972.5	11	75260129	75262466	-	2338	TEC	TEC	-
ENSG00000196743	214.645	346.633	-0.686752	8.66e-05	0.000971537	GM2A	5	151212150	151270440	+	4479	protein_coding	GM2 ganglioside activator [Source:HGNC Symbol;Acc:HGNC:4367]	-
ENSG00000173320	169.723	340.465	-0.996609	8.68e-05	0.000973632	STOX2	4	183797692	184023526	+	11316	protein_coding	storkhead box 2 [Source:HGNC Symbol;Acc:HGNC:25450]	-
ENSG00000112159	902.967	1569.11	-0.798141	8.69e-05	0.000973955	MDN1	6	89642499	89819723	-	18602	protein_coding	midasin AAA ATPase 1 [Source:HGNC Symbol;Acc:HGNC:18302]	-
ENSG00000261934	8.93162	28.1784	-1.69571	8.7e-05	0.0009753	PCDHGA9	5	141402932	141512979	+	4749	protein_coding	protocadherin gamma subfamily A, 9 [Source:HGNC Symbol;Acc:HGNC:8707]	-
ENSG00000104413	11.0686	0.580462	4.34145	8.77e-05	0.000982716	ESRP1	8	94641074	94707466	+	4875	protein_coding	epithelial splicing regulatory protein 1 [Source:HGNC Symbol;Acc:HGNC:25966]	-
ENSG00000171067	539.604	345.504	0.644335	8.78e-05	0.000983281	C11orf24	11	68261335	68272001	-	3406	protein_coding	chromosome 11 open reading frame 24 [Source:HGNC Symbol;Acc:HGNC:1174]	-
ENSG00000185404	17.7999	4.96838	1.8406	8.79e-05	0.000983702	SP140L	2	230327184	230403732	+	5650	protein_coding	SP140 nuclear body protein like [Source:HGNC Symbol;Acc:HGNC:25105]	SAND
ENSG00000180354	450.134	714.08	-0.661604	8.8e-05	0.000983702	MTURN	7	30134810	30162762	+	6532	protein_coding	maturin, neural progenitor differentiation regulator homolog [Source:HGNC Symbol;Acc:HGNC:25457]	-
ENSG00000265415	47.2829	97.6357	-1.05839	8.81e-05	0.000984341	AC099850.3	17	59202677	59203829	-	321	antisense	novel transcript, antisense to PRR11	-
ENSG00000273759	20.4588	5.97375	1.79185	8.81e-05	0.000984341	AL117379.1	20	62928621	62929297	-	677	lincRNA	novel transcript	-
ENSG00000107614	86.826	144.177	-0.72172	8.84e-05	0.000987328	TRDMT1	10	17142254	17202054	-	10535	protein_coding	tRNA aspartic acid methyltransferase 1 [Source:HGNC Symbol;Acc:HGNC:2977]	-
ENSG00000124104	352.733	211.009	0.73698	8.91e-05	0.000994421	SNX21	20	45833810	45843275	+	4066	protein_coding	sorting nexin family member 21 [Source:HGNC Symbol;Acc:HGNC:16154]	-
ENSG00000253633	72.2946	7.38981	3.29742	8.94e-05	0.000997451	AP002852.1	8	102528740	102538668	+	1231	lincRNA	uncharacterized LOC107986898 [Source:NCBI gene;Acc:107986898]	-
ENSG00000074800	24191	17521.6	0.465337	8.95e-05	0.000998152	ENO1	1	8861000	8879250	-	5276	protein_coding	enolase 1 [Source:HGNC Symbol;Acc:HGNC:3350]	-
ENSG00000232748	2.48232	15.048	-2.6009	8.97e-05	0.000998987	AC135050.1	16	31056460	31062803	+	3593	lincRNA	novel transcript, antisense to ZNF668	-
ENSG00000081041	315.194	6.02591	5.71014	9.01e-05	0.00100296	CXCL2	4	74097035	74099293	-	1500	protein_coding	C-X-C motif chemokine ligand 2 [Source:HGNC Symbol;Acc:HGNC:4603]	-
ENSG00000203685	108.218	233.033	-1.1166	9.01e-05	0.00100336	STUM	1	226548800	226609214	+	7791	protein_coding	stum, mechanosensory transduction mediator homolog [Source:HGNC Symbol;Acc:HGNC:30491]	-
ENSG00000279312	5.19952	23.0185	-2.08581	9.06e-05	0.00100804	AL136164.4	6	71373253	71375387	-	2135	TEC	TEC	-
ENSG00000073849	351.433	492.052	-0.486403	9.07e-05	0.00100825	ST6GAL1	3	186930485	187078553	+	9151	protein_coding	ST6 beta-galactoside alpha-2,6-sialyltransferase 1 [Source:HGNC Symbol;Acc:HGNC:10860]	-
ENSG00000132967	415.22	667.712	-0.684826	9.1e-05	0.00101096	HMGB1P5	3	22381819	22382929	+	1111	transcribed_processed_pseudogene	high mobility group box 1 pseudogene 5 [Source:HGNC Symbol;Acc:HGNC:4997]	-
ENSG00000233818	50.9732	2.94071	4.12313	9.14e-05	0.00101528	AP000695.2	21	36445731	36532408	+	1178	antisense	novel transcript	-
ENSG00000067057	2635.95	1309.42	1.00993	9.2e-05	0.0010213	PFKP	10	3066333	3137712	+	4836	protein_coding	phosphofructokinase, platelet [Source:HGNC Symbol;Acc:HGNC:8878]	-
ENSG00000112309	7.40395	25.0929	-1.71497	9.21e-05	0.00102182	B3GAT2	6	70856679	70957038	-	6565	protein_coding	beta-1,3-glucuronyltransferase 2 [Source:HGNC Symbol;Acc:HGNC:922]	-
ENSG00000278180	0.489846	11.6582	-4.34859	9.23e-05	0.00102401	AL451054.3	1	227490691	227492296	+	776	unprocessed_pseudogene	FAM166A, pseudogene 5	-
ENSG00000179222	1395.75	2008.86	-0.526995	9.25e-05	0.00102526	MAGED1	X	51803007	51902357	+	6016	protein_coding	MAGE family member D1 [Source:HGNC Symbol;Acc:HGNC:6813]	-
ENSG00000254726	397.636	611.299	-0.624364	9.26e-05	0.00102556	MEX3A	1	156072013	156081998	-	6124	protein_coding	mex-3 RNA binding family member A [Source:HGNC Symbol;Acc:HGNC:33482]	-
ENSG00000185798	248.476	166.694	0.579677	9.26e-05	0.00102556	WDR53	3	196554177	196568674	-	1797	protein_coding	WD repeat domain 53 [Source:HGNC Symbol;Acc:HGNC:28786]	-
ENSG00000125247	77.3582	132.899	-0.765156	9.27e-05	0.00102638	TMTC4	13	100603927	100675093	-	6272	protein_coding	transmembrane and tetratricopeptide repeat containing 4 [Source:HGNC Symbol;Acc:HGNC:25904]	-
ENSG00000148153	415.45	683.019	-0.718628	9.28e-05	0.00102689	INIP	9	112683926	112718236	-	4423	protein_coding	INTS3 and NABP interacting protein [Source:HGNC Symbol;Acc:HGNC:24994]	-
ENSG00000149599	149.479	84.9525	0.810285	9.3e-05	0.00102777	DUSP15	20	31847637	31870747	-	3791	protein_coding	dual specificity phosphatase 15 [Source:HGNC Symbol;Acc:HGNC:16236]	-
ENSG00000142178	136.471	56.7573	1.26902	9.54e-05	0.00105465	SIK1	21	43414483	43427189	-	5268	protein_coding	salt inducible kinase 1 [Source:HGNC Symbol;Acc:HGNC:11142]	-
ENSG00000105254	1582.95	979.814	0.690934	9.62e-05	0.00106199	TBCB	19	36114289	36125947	+	3326	protein_coding	tubulin folding cofactor B [Source:HGNC Symbol;Acc:HGNC:1989]	-
ENSG00000138798	67.2862	130.885	-0.942679	9.63e-05	0.00106276	EGF	4	109912884	110012266	+	6127	protein_coding	epidermal growth factor [Source:HGNC Symbol;Acc:HGNC:3229]	-
ENSG00000167797	633.046	354.965	0.832178	9.64e-05	0.00106276	CDK2AP2	11	67506497	67508649	-	2019	protein_coding	cyclin dependent kinase 2 associated protein 2 [Source:HGNC Symbol;Acc:HGNC:30833]	-
ENSG00000057608	2431.91	3791.56	-0.640597	9.64e-05	0.00106276	GDI2	10	5765223	5842132	-	4033	protein_coding	GDP dissociation inhibitor 2 [Source:HGNC Symbol;Acc:HGNC:4227]	-
ENSG00000263826	8.05384	28.7237	-1.84082	9.7e-05	0.00106945	AC112907.3	3	186781780	186784179	-	2400	antisense	novel transcript, antisense to eukaryotic translation initiation factor 4A, isoform 2 EIF4A2	-
ENSG00000261488	37.0939	99.7792	-1.40561	9.73e-05	0.00107222	TBILA	3	112133423	112135359	+	1937	antisense	TGF-beta induced lncRNA [Source:HGNC Symbol;Acc:HGNC:53943]	-
ENSG00000197937	142.673	243.728	-0.767	9.79e-05	0.00107798	ZNF347	19	53124072	53159075	-	9131	protein_coding	zinc finger protein 347 [Source:HGNC Symbol;Acc:HGNC:16447]	zf-C2H2
ENSG00000167977	1079.09	665.889	0.694424	9.81e-05	0.00107926	KCTD5	16	2682475	2709030	+	3420	protein_coding	potassium channel tetramerization domain containing 5 [Source:HGNC Symbol;Acc:HGNC:21423]	-
ENSG00000114646	104.429	160.15	-0.617279	9.81e-05	0.00107926	CSPG5	3	47562239	47580792	-	4366	protein_coding	chondroitin sulfate proteoglycan 5 [Source:HGNC Symbol;Acc:HGNC:2467]	-
ENSG00000152926	51.3722	178.135	-1.7809	9.82e-05	0.00107926	ZNF117	7	64971776	65006684	-	10691	protein_coding	zinc finger protein 117 [Source:HGNC Symbol;Acc:HGNC:12897]	zf-C2H2
ENSG00000244509	255.826	417.774	-0.706935	9.95e-05	0.00109297	APOBEC3C	22	39014083	39020352	+	2818	protein_coding	apolipoprotein B mRNA editing enzyme catalytic subunit 3C [Source:HGNC Symbol;Acc:HGNC:17353]	-
ENSG00000163507	386.238	930.023	-1.26461	9.95e-05	0.00109316	CIP2A	3	108549869	108589644	-	4579	protein_coding	cell proliferation regulating inhibitor of protein phosphatase 2A [Source:HGNC Symbol;Acc:HGNC:29302]	-
ENSG00000162378	382.044	617.045	-0.687493	0.000101098	0.00110981	ZYG11B	1	52726467	52827342	+	8198	protein_coding	zyg-11 family member B, cell cycle regulator [Source:HGNC Symbol;Acc:HGNC:25820]	-
ENSG00000145833	1037.09	1753.38	-0.755846	0.000101331	0.0011118	DDX46	5	134758771	134855133	+	9222	protein_coding	DEAD-box helicase 46 [Source:HGNC Symbol;Acc:HGNC:18681]	-
ENSG00000131711	1087.08	2319.45	-1.092	0.000101745	0.00111578	MAP1B	5	72107234	72209570	+	12630	protein_coding	microtubule associated protein 1B [Source:HGNC Symbol;Acc:HGNC:6836]	-
ENSG00000116273	519.575	309.816	0.748557	0.00010188	0.00111669	PHF13	1	6613685	6624033	+	3681	protein_coding	PHD finger protein 13 [Source:HGNC Symbol;Acc:HGNC:22983]	-
ENSG00000124641	387.673	574.33	-0.566785	0.000101992	0.00111734	MED20	6	41905354	41921139	-	3278	protein_coding	mediator complex subunit 20 [Source:HGNC Symbol;Acc:HGNC:16840]	-
ENSG00000277196	6.02729	24.257	-1.96146	0.000102153	0.00111854	AC007325.2	KI270734.1	138082	161852	-	2405	protein_coding	proline dehydrogenase 1, mitochondrial [Source:NCBI gene;Acc:102724788]	-
ENSG00000080573	147.715	20.1781	2.8669	0.000102517	0.00112196	COL5A3	19	9959561	10010471	-	6750	protein_coding	collagen type V alpha 3 chain [Source:HGNC Symbol;Acc:HGNC:14864]	-
ENSG00000260948	4.81122	19.9247	-2.07414	0.000103351	0.00113051	AL390195.2	1	111431046	111433068	-	2023	sense_overlapping	novel transcript, sense overlapping WDR77 & OVGP1	-
ENSG00000154640	419.989	227.113	0.890779	0.000103688	0.00113362	BTG3	21	17593653	17612947	-	2306	protein_coding	BTG anti-proliferation factor 3 [Source:HGNC Symbol;Acc:HGNC:1132]	-
ENSG00000141384	242.065	140.835	0.787313	0.000105	0.00114738	TAF4B	18	26225936	26391685	+	5395	protein_coding	TATA-box binding protein associated factor 4b [Source:HGNC Symbol;Acc:HGNC:11538]	-
ENSG00000122367	76.5902	145.899	-0.920689	0.000105121	0.00114812	LDB3	10	86668449	86736068	+	6676	protein_coding	LIM domain binding 3 [Source:HGNC Symbol;Acc:HGNC:15710]	-
ENSG00000165521	9.0142	27.0076	-1.60577	0.000105682	0.00115364	EML5	14	88612431	88792752	-	11000	protein_coding	echinoderm microtubule associated protein like 5 [Source:HGNC Symbol;Acc:HGNC:18197]	-
ENSG00000147475	508.202	664.413	-0.387012	0.000105733	0.00115364	ERLIN2	8	37736601	37759101	+	9415	protein_coding	ER lipid raft associated 2 [Source:HGNC Symbol;Acc:HGNC:1356]	-
ENSG00000144909	163.239	313.943	-0.933956	0.000106141	0.0011575	OSBPL11	3	125528858	125595090	-	4191	protein_coding	oxysterol binding protein like 11 [Source:HGNC Symbol;Acc:HGNC:16397]	-
ENSG00000148426	166.672	66.5137	1.31712	0.000106588	0.00116178	PROSER2	10	11823339	11872277	+	3663	protein_coding	proline and serine rich 2 [Source:HGNC Symbol;Acc:HGNC:23728]	-
ENSG00000145725	294.412	741.83	-1.3292	0.000106926	0.00116488	PPIP5K2	5	103120149	103212799	+	17270	protein_coding	diphosphoinositol pentakisphosphate kinase 2 [Source:HGNC Symbol;Acc:HGNC:29035]	-
ENSG00000138771	429.431	233.778	0.873324	0.000106987	0.00116496	SHROOM3	4	76435100	76783253	+	13958	protein_coding	shroom family member 3 [Source:HGNC Symbol;Acc:HGNC:30422]	-
ENSG00000121871	16.3761	39.7208	-1.25543	0.000107235	0.00116706	SLITRK3	3	165186720	165197109	-	4892	protein_coding	SLIT and NTRK like family member 3 [Source:HGNC Symbol;Acc:HGNC:23501]	-
ENSG00000276805	114.373	48.7102	1.22662	0.000108738	0.00118283	AL133216.2	10	38403189	38452153	+	7213	transcribed_unprocessed_pseudogene	general transcription factor IIi (GTF2I) pseudogene	-
ENSG00000275854	0.818165	11.7801	-3.82642	0.000108871	0.00118367	AC084824.4	12	32736930	32737660	-	731	sense_intronic	novel transcript, sense intronic to YARS2	-
ENSG00000027847	224.178	127.769	0.804254	0.000109255	0.00118725	B4GALT7	5	177600100	177610347	+	4927	protein_coding	beta-1,4-galactosyltransferase 7 [Source:HGNC Symbol;Acc:HGNC:930]	-
ENSG00000077152	679.756	1135.1	-0.740708	0.000109354	0.00118773	UBE2T	1	202331657	202341980	-	1652	protein_coding	ubiquitin conjugating enzyme E2 T [Source:HGNC Symbol;Acc:HGNC:25009]	-
ENSG00000102032	98.0835	49.5936	0.990233	0.00011007	0.0011949	RENBP	X	153935263	153944691	-	2057	protein_coding	renin binding protein [Source:HGNC Symbol;Acc:HGNC:9959]	-
ENSG00000196458	152.823	462.151	-1.59001	0.00011024	0.00119614	ZNF605	12	132918308	132956306	-	10824	protein_coding	zinc finger protein 605 [Source:HGNC Symbol;Acc:HGNC:28068]	zf-C2H2
ENSG00000176422	80.9431	163.307	-1.02892	0.000111151	0.00120543	SPRYD4	12	56468567	56479707	+	10779	protein_coding	SPRY domain containing 4 [Source:HGNC Symbol;Acc:HGNC:27468]	-
ENSG00000131473	2040.88	3005.96	-0.559708	0.000111458	0.00120815	ACLY	17	41866908	41930542	-	5217	protein_coding	ATP citrate lyase [Source:HGNC Symbol;Acc:HGNC:115]	-
ENSG00000205215	35.4083	117.932	-1.71289	0.000111528	0.00120829	KRT17P7	17	20519312	20528687	-	2625	transcribed_unprocessed_pseudogene	keratin 17 pseudogene 7 [Source:HGNC Symbol;Acc:HGNC:50725]	-
ENSG00000272886	637.248	470.758	0.438574	0.000111618	0.00120866	DCP1A	3	53283428	53347610	-	6127	protein_coding	decapping mRNA 1A [Source:HGNC Symbol;Acc:HGNC:18714]	-
ENSG00000197405	19.7356	5.40017	1.90731	0.000111733	0.0012093	C5AR1	19	47290023	47322066	+	2951	protein_coding	complement C5a receptor 1 [Source:HGNC Symbol;Acc:HGNC:1338]	-
ENSG00000265194	0	7.53644	-4.8727	0.000111809	0.00120952	AL359922.2	9	21858910	21861926	-	3017	antisense	novel transcript, antisense MTAP	-
ENSG00000197061	42.168	2.79827	3.90822	0.000112313	0.00121436	HIST1H4C	6	26103876	26104310	+	435	protein_coding	histone cluster 1 H4 family member c [Source:HGNC Symbol;Acc:HGNC:4787]	-
ENSG00000173013	13.9768	3.6453	1.94171	0.000112935	0.00122047	CCDC96	4	7040849	7042939	-	2091	protein_coding	coiled-coil domain containing 96 [Source:HGNC Symbol;Acc:HGNC:26900]	-
ENSG00000135723	861.374	623.714	0.465746	0.000113058	0.00122118	FHOD1	16	67229387	67247658	-	5407	protein_coding	formin homology 2 domain containing 1 [Source:HGNC Symbol;Acc:HGNC:17905]	-
ENSG00000205423	149.803	87.8941	0.768634	0.00011443	0.00123445	CNEP1R1	16	50024410	50037088	+	4178	protein_coding	CTD nuclear envelope phosphatase 1 regulatory subunit 1 [Source:HGNC Symbol;Acc:HGNC:26759]	-
ENSG00000151065	165.484	96.8914	0.775769	0.00011444	0.00123445	DCP1B	12	1946054	2004535	-	4609	protein_coding	decapping mRNA 1B [Source:HGNC Symbol;Acc:HGNC:24451]	-
ENSG00000254206	27.2771	11.1935	1.28836	0.000114458	0.00123445	NPIPB11	16	29381354	29404029	-	4398	protein_coding	nuclear pore complex interacting protein family member B11 [Source:HGNC Symbol;Acc:HGNC:37453]	-
ENSG00000281207	13.4752	46.815	-1.84375	0.00011455	0.00123482	SLFNL1-AS1	1	41014590	41043890	+	4800	antisense	SLFNL1 antisense RNA 1 [Source:HGNC Symbol;Acc:HGNC:44126]	-
ENSG00000180787	172.23	268.326	-0.641652	0.000115326	0.00124237	ZFP3	17	5078248	5096374	+	5206	protein_coding	ZFP3 zinc finger protein [Source:HGNC Symbol;Acc:HGNC:12861]	zf-C2H2
[truncated: 2,616 more rows]
